# Supplementary material for: Rhodium(iii) catalyzed olefination and deuteration of tetrahydrocarbazole
Source: Royal Society of Chemistry journal article supplement (doi:10.1039/d1ra00236h), 2021-01-01
Supplement: d1ra00236h1.pdf [file d1ra00236h1.pdf]

## Supporting information

### **Rhodium (III) catalyzed olefination and deuteration of tetrahydrocarbazole**

Wan Peng, Qiaohong Liu, Fucheng Yin, Cunjian Shi, Limei Ji, Lailiang Qu, Cheng  
Wang, Heng Luo, Lingyi Kong\* and Xiaobing Wang\*

*Jiangsu Key Laboratory of Bioactive Natural Product Research and State Key  
Laboratory of Natural Medicines, School of Traditional Chinese Pharmacy, China  
Pharmaceutical University, 24 Tong Jia Xiang, Nanjing 210009, People's Republic of  
China*

*\*Corresponding Authors*

*Tel/Fax: +86-25-83271405;*

*E-mail: xbwang@cpu.edu.cn (Xiaobing Wang); cpu\_lykong@126.com (Lingyi Kong)*

## Table of contents

|                                                                  |     |
|------------------------------------------------------------------|-----|
| 1. General Information.....                                      | 3   |
| 2. Experimental Section.....                                     | 4   |
| 2.1 Preparation and characterization of substrates.....          | 4   |
| 2.2 Optimization studies.....                                    | 16  |
| 2.3 The general procedure for rhodium-catalyzed olefination..... | 19  |
| 2.4 The general procedure for rhodium-catalyzed deuteration..... | 38  |
| 2.5 The utility of this method.....                              | 44  |
| 2.6 Mechanistic Studies.....                                     | 46  |
| 3. NMR and HRMS Spectra for New Compounds.....                   | 51  |
| 4. X-ray Crystallographic Analysis of <b>3p</b> .....            | 187 |

## 1. General Information

Unless otherwise noted, all materials were gained from commercial sources without further purification. Solvents were available from Sigma-Aldrich, Alfa-Aesar, and Acros and used directly without further purification. Before running reactions all heating plates were allowed to warm to the desired temperature for at least 15 minutes to allow for sufficient equilibration.

All isolated compounds were characterized by  $^1\text{H}$  NMR,  $^{13}\text{C}$  NMR spectroscopy. Copies of the  $^1\text{H}$  NMR,  $^{13}\text{C}$  NMR could be noted in the supporting information.  $^1\text{H}$  NMR spectra were recorded either on a Bruker AVANCE AV-500 spectrometer (500 MHz for  $^1\text{H}$ , 125 MHz for  $^{13}\text{C}$ ) or Bruker AVANCE AV-500 spectrometer (600 MHz for  $^1\text{H}$ , 150 MHz for  $^{13}\text{C}$ ). All  $^1\text{H}$  NMR experiments were reported in units, parts per million (ppm), and were measured relative to the signals for residual chloroform (7.26 ppm) in the deuterated solvent, unless otherwise stated. All  $^{13}\text{C}$  NMR spectra were reported in ppm relative to  $\text{CDCl}_3$  (77.23 ppm), unless otherwise stated.

High-resolution electrospray ionization (HRESI) mass spectra were carried out using an Agilent 6520B Q-TOF mass spectrometer (Agilent Technologies, Santa Clara, CA, USA).

## 2. Experimental section

### 2.1 Preparation and characterization of substrates

#### 2.1.1 Procedure for the preparation of template substrates

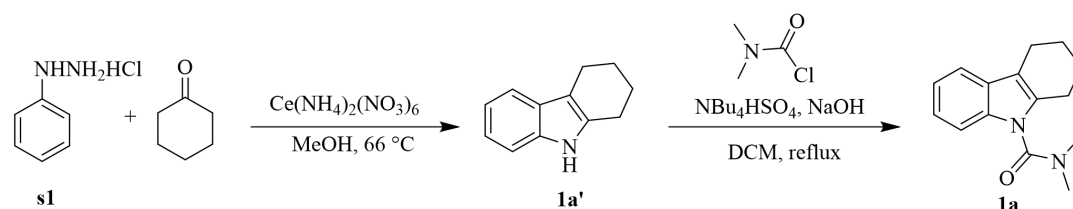

To a solution of **s1** (1.0 g, 6.9 mmol) and cyclohexanone (6.9 mmol) in MeOH (40 mL) in a round bottom flask were added  $\text{Ce}(\text{NH}_4)_2(\text{NO}_3)_6$  (1.4 mmol). Then the reaction mixture was heated to  $66\text{ }^\circ\text{C}$  until the reaction completed as judged by TLC. The reaction mixture was quenched with  $\text{H}_2\text{O}$  and extracted with ethyl acetate (three times). The combined organic layer was washed with brine, dried over  $\text{MgSO}_4$ , and concentrated in vacuum. The residue was purified by silica gel column chromatography using petroleum ether/ethyl acetate (15:1) as eluents to afford the product **1a'**.<sup>1</sup> The product was used in the next step without further purification. A 100 mL flask was charged with **s1** (1.1 g, 6.4 mmol),  $\text{NBu}_4\text{HSO}_4$  (0.64 mmol) and NaOH (16 mmol). The flask was then fitted with a reflux condenser and flushed with argon. Dry  $\text{CH}_2\text{Cl}_2$  (20 mL) and dimethylcarbamylchloride (9.6 mmol) were added to the flask and the resulting solution was refluxed overnight. The reaction was quenched with saturated  $\text{NH}_4\text{Cl}$  solution. The organic layer was separated, and the aqueous phase was extracted with  $\text{CH}_2\text{Cl}_2$ . The organics were combined, dried over  $\text{MgSO}_4$ , concentrated and the residue was purified by silica gel column chromatography using petroleum ether/ethyl acetate (10:1) as eluents.<sup>2</sup>



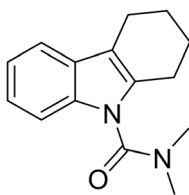

***N,N*-dimethyl-1,2,3,4-tetrahydro-9*H*-carbazole-9-carboxamide (1a)**

Faint yellow solid, m.p. 73-74 °C;  $^1\text{H NMR}$  (600 MHz,  $\text{CDCl}_3$ )  $\delta$  7.44 (d,  $J = 7.7$  Hz, 1H), 7.23 (d,  $J = 8.1$  Hz, 1H), 7.18 (t,  $J = 7.5$  Hz, 1H), 7.13 (t,  $J = 7.3$  Hz, 1H), 3.04 (s, 6H), 2.79 (s, 2H), 2.68 (t,  $J = 6.0$  Hz, 2H), 1.94-1.84 (m, 4H);  $^{13}\text{C NMR}$  (150 MHz, Chloroform-*d*)  $\delta$  154.6, 135.3, 134.9, 128.6, 122.1, 120.7, 118.0, 113.8, 111.3, 77.2, 37.9, 23.0, 22.9, 22.7, 20.8; **HRMS** calcd. for  $\text{C}_{15}\text{H}_{19}\text{N}_2\text{O}$   $[\text{M}+\text{H}]^+$ : 243.1492, found: 243.1491.

The spectroscopic data are in accordance with those reported.<sup>3</sup>

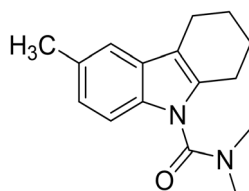

***N,N,6*-trimethyl-1,2,3,4-tetrahydro-9*H*-carbazole-9-carboxamide (1b)**

Yellow oil;  $^1\text{H NMR}$  (600 MHz,  $\text{CDCl}_3$ )  $\delta$  7.22 (d,  $J = 1.6$  Hz, 1H), 7.11 (d,  $J = 8.2$  Hz, 1H), 7.00 (dd,  $J = 8.4, 1.6$  Hz, 1H), 3.04 (s, 6H), 2.78 (s, 2H), 2.66-2.64 (m, 2H), 2.44 (s, 3H), 1.93-1.82 (m, 4H);  $^{13}\text{C NMR}$  (150 MHz,  $\text{CDCl}_3$ )  $\delta$  154.8, 135.6, 133.3, 130.1, 128.9, 123.5, 118.0, 113.6, 111.2, 77.2, 38.0, 23.2, 23.1, 22.8, 21.4, 20.9; **HRMS** calcd. for  $\text{C}_{14}\text{H}_{17}\text{N}_2\text{O}$   $[\text{M}+\text{H}]^+$ : 257.1648, found: 257.1651.

The spectroscopic data are in accordance with those reported.<sup>3</sup>

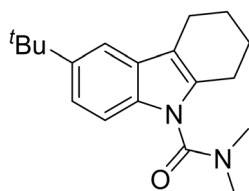

**6-(*tert*-butyl)-*N,N*-dimethyl-1,2,3,4-tetrahydro-9*H*-carbazole-9-carboxamide (1c)**

White solid, m.p. 106-108 °C;  $^1\text{H NMR}$  (600 MHz,  $\text{CDCl}_3$ )  $\delta$  7.41 (d,  $J = 1.9$  Hz, 1H), 7.25 (dd,  $J = 8.6, 1.9$  Hz, 1H), 7.16 (d,  $J = 8.6$  Hz, 1H), 3.05 (s, 6H), 2.79 (t,  $J = 5.6$

Hz, 2H), 2.69 (td,  $J = 5.8, 2.0$  Hz, 2H), 2.08-1.70 (m, 4H), 1.38 (s, 9H);  $^{13}\text{C}$  NMR (150 MHz,  $\text{CDCl}_3$ )  $\delta$  154.8, 143.8, 135.5, 133.1, 128.4, 120.1, 114.0, 113.9, 111.0, 77.2, 37.9, 34.5, 31.8, 23.1, 23.1, 22.8, 20.9; HRMS calcd. for  $\text{C}_{19}\text{H}_{27}\text{N}_2\text{O}$   $[\text{M}+\text{H}]^+$ : 299.2118, found: 299.2120.

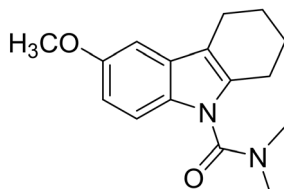

**6-methoxy-*N,N*-dimethyl-1,2,3,4-tetrahydro-9*H*-carbazole-9-carboxamide (1d)**

Yellow oil;  $^1\text{H}$  NMR (500 MHz,  $\text{CDCl}_3$ )  $\delta$  7.18 (d,  $J = 8.8$  Hz, 1H), 6.94 (s, 1H), 6.86 (d,  $J = 8.6$  Hz, 1H), 3.90 (s, 3H), 3.09 (s, 6H), 2.84 (s, 2H), 2.69 (s, 2H), 2.03-1.84 (m, 4H);  $^{13}\text{C}$  NMR (125 MHz,  $\text{CDCl}_3$ )  $\delta$  154.8, 154.7, 136.2, 129.9, 129.2, 113.7, 112.0, 111.0, 100.7, 77.2, 55.7, 37.9, 23.1, 23.0, 22.7, 20.9; HRMS calcd. for  $\text{C}_{16}\text{H}_{21}\text{N}_2\text{O}_2$   $[\text{M}+\text{H}]^+$ : 273.1595, found: 273.1594.

The spectroscopic data are in accordance with those reported.<sup>3</sup>

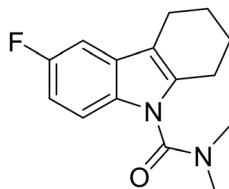

**6-fluoro-*N,N*-dimethyl-1,2,3,4-tetrahydro-9*H*-carbazole-9-carboxamide (1e)**

Faint yellow oil;  $^1\text{H}$  NMR (600 MHz,  $\text{CDCl}_3$ )  $\delta$  7.14 (dd,  $J = 8.8, 4.3$  Hz, 1H), 7.07 (dd,  $J = 9.1, 2.5$  Hz, 1H), 6.90 (td,  $J = 9.0, 2.6$  Hz, 1H), 3.04 (s, 6H), 2.78 (s, 2H), 2.63 (tt,  $J = 5.9, 1.8$  Hz, 2H), 1.98-1.82 (m, 4H);  $^{13}\text{C}$  NMR (150 MHz,  $\text{CDCl}_3$ )  $\delta$  158.8 (d,  $J = 235.5$  Hz), 154.8, 137.6, 131.8, 129.7 (d,  $J = 9.0$  Hz), 114.2 (d,  $J = 4.5$  Hz), 112.3 (d,  $J = 10.5$  Hz), 110.2 (d,  $J = 25.5$  Hz), 103.9 (d,  $J = 24.0$  Hz), 77.2, 38.3, 23.5, 23.3, 23.0, 21.2; HRMS calcd. for  $\text{C}_{15}\text{H}_{18}\text{FN}_2\text{O}$   $[\text{M}+\text{H}]^+$ : 261.1398, found: 261.1399.

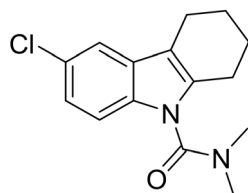

**6-chloro-*N,N*-dimethyl-1,2,3,4-tetrahydro-9*H*-carbazole-9-carboxamide (1f)**

Faint yellow oil;  $^1\text{H NMR}$  (500 MHz,  $\text{CDCl}_3$ )  $\delta$  7.39 (s, 1H), 7.13 (s, 2H), 3.03 (s, 6H), 2.78 (t,  $J = 5.5$  Hz, 2H), 2.64 (td,  $J = 5.9, 1.8$  Hz, 2H), 1.98-1.80 (m, 4H);  $^{13}\text{C NMR}$  (125 MHz,  $\text{CDCl}_3$ )  $\delta$  154.1, 136.8, 133.3, 129.7, 126.3, 122.1, 117.7, 113.3, 112.2, 77.2, 37.8, 22.9, 22.9, 22.5, 20.6; **HRMS** calcd. for  $\text{C}_{15}\text{H}_{18}\text{ClN}_2\text{O}$   $[\text{M}+\text{H}]^+$ : 277.1102, found: 277.1102.

The spectroscopic data are in accordance with those reported.<sup>3</sup>

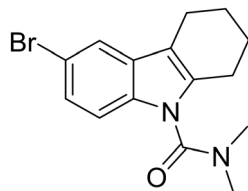

**6-bromo-*N,N*-dimethyl-1,2,3,4-tetrahydro-9*H*-carbazole-9-carboxamide (1g)**

Faint yellow oil;  $^1\text{H NMR}$  (500 MHz,  $\text{CDCl}_3$ )  $\delta$  7.55 (d,  $J = 1.9$  Hz, 1H), 7.25 (dd,  $J = 8.8, 2.5$  Hz, 1H), 7.09 (d,  $J = 8.6$  Hz, 1H), 3.02 (s, 6H), 2.77 (s, 2H), 2.63 (t,  $J = 5.6$  Hz, 2H), 1.91-1.83 (m, 4H);  $^{13}\text{C NMR}$  (125 MHz,  $\text{CDCl}_3$ )  $\delta$  154.0, 136.6, 133.5, 130.2, 124.7, 120.7, 113.9, 113.2, 112.6, 77.2, 37.8, 22.8, 22.8, 22.5, 20.6; **HRMS** calcd. for  $\text{C}_{15}\text{H}_{18}\text{BrN}_2\text{O}$   $[\text{M}+\text{H}]^+$ : 321.0597, found: 321.0597.

The spectroscopic data are in accordance with those reported.<sup>3</sup>

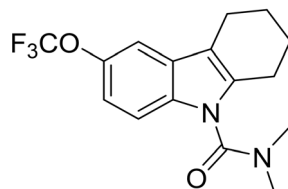

***N,N*-dimethyl-6-(trifluoromethoxy)-1,2,3,4-tetrahydro-9*H*-carbazole-9-carboxamide (1h)**

Faint yellow solid, m.p. 73-74 °C;  $^1\text{H NMR}$  (500 MHz,  $\text{CDCl}_3$ )  $\delta$  7.27 (d,  $J = 2.2$  Hz, 1H), 7.20 (d,  $J = 8.7$  Hz, 1H), 7.04 (dd,  $J = 8.8, 2.3$  Hz, 1H), 3.04 (s, 6H), 2.78 (s, 2H),

2.71-2.58 (m, 2H), 1.97-1.82 (m, 4H);  $^{13}\text{C}$  NMR (125 MHz,  $\text{CDCl}_3$ )  $\delta$  154.6, 144.2, 137.8, 133.7, 129.5, 122.2, 116.1, 114.4, 112.2, 111.1, 77.2, 38.3, 23.4, 23.4, 23.0, 21.2; HRMS calcd. for  $\text{C}_{16}\text{H}_{18}\text{F}_3\text{N}_2\text{O}_2$   $[\text{M}+\text{H}]^+$ : 327.1315, found: 327.1316.

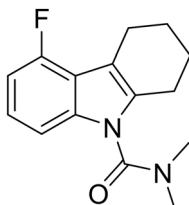

**5-fluoro-*N,N*-dimethyl-1,2,3,4-tetrahydro-9*H*-carbazole-9-carboxamide (1i)**

Faint yellow oil;  $^1\text{H}$  NMR (600 MHz,  $\text{CDCl}_3$ )  $\delta$  7.33 (dd,  $J = 8.5, 5.4$  Hz, 1H), 6.95 (dd,  $J = 9.9, 2.3$  Hz, 1H), 6.89 (td,  $J = 9.0, 2.3$  Hz, 1H), 3.05 (s, 6H), 2.76 (s, 2H), 2.65 (td,  $J = 5.9, 2.0$  Hz, 2H), 1.91-1.84 (m, 4H);  $^{13}\text{C}$  NMR (125 MHz,  $\text{CDCl}_3$ )  $\delta$  160.0 (d,  $J = 236.2$  Hz), 154.2, 135.5 (d,  $J = 5.0$  Hz), 135.0 (d,  $J = 12.5$  Hz), 125.0, 118.4 (d,  $J = 10.0$  Hz), 113.6, 108.8 (d,  $J = 23.8$  Hz), 98.5 (d,  $J = 26.2$  Hz), 77.2, 37.8, 22.9, 22.6, 20.7; HRMS calcd. for  $\text{C}_{15}\text{H}_{18}\text{FN}_2\text{O}$   $[\text{M}+\text{H}]^+$ : 261.1398, found: 261.1400.

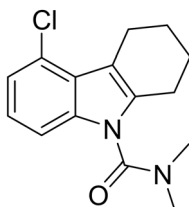

**5-chloro-*N,N*-dimethyl-1,2,3,4-tetrahydro-9*H*-carbazole-9-carboxamide (1j)**

Faint yellow oil;  $^1\text{H}$  NMR (600 MHz,  $\text{CDCl}_3$ )  $\delta$  7.33 (d,  $J = 8.3$  Hz, 1H), 7.22 (d,  $J = 1.8$  Hz, 1H), 7.10 (dd,  $J = 8.3, 1.8$  Hz, 1H), 3.04 (s, 6H), 2.76 (s, 2H), 2.65 (tt,  $J = 5.8, 1.8$  Hz, 2H), 1.95-1.79 (m, 4H);  $^{13}\text{C}$  NMR (150 MHz,  $\text{CDCl}_3$ )  $\delta$  154.0, 136.0, 135.3, 128.0, 127.1, 121.2, 118.8, 113.7, 111.4, 77.2, 37.9, 22.9, 22.9, 22.5, 20.7; HRMS calcd. for  $\text{C}_{15}\text{H}_{18}\text{ClN}_2\text{O}$   $[\text{M}+\text{H}]^+$ : 277.1102, found: 277.1102.

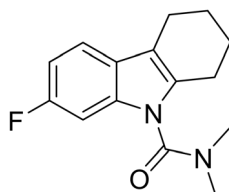

**7-fluoro-*N,N*-dimethyl-1,2,3,4-tetrahydro-9*H*-carbazole-9-carboxamide (1k)**

Faint yellow solid; m.p. 101-102 °C;  $^1\text{H NMR}$  (600 MHz,  $\text{CDCl}_3$ )  $\delta$  7.06 (td,  $J = 8.0$ , 5.1 Hz, 1H), 6.99 (d,  $J = 8.2$  Hz, 1H), 6.77 (ddd,  $J = 10.4$ , 7.9, 0.8 Hz, 1H), 3.03 (s, 6H), 2.87 (t,  $J = 5.5$  Hz, 2H), 2.76 (s, 2H), 1.96-1.80 (m, 4H);  $^{13}\text{C NMR}$  (150 MHz,  $\text{CDCl}_3$ )  $\delta$  156.6 (d,  $J = 244.5$  Hz), 154.1, 137.3 (d,  $J = 12.0$  Hz), 134.9, 122.5 (d,  $J = 7.5$  Hz), 117.0 (d,  $J = 19.5$  Hz), 111.8, 107.3, 106.2 (d,  $J = 19.5$  Hz), 77.2, 37.8, 22.8, 22.8, 22.6, 22.3; **HRMS** calcd. for  $\text{C}_{15}\text{H}_{18}\text{FN}_2\text{O}$   $[\text{M}+\text{H}]^+$ : 261.1398, found: 261.1397.

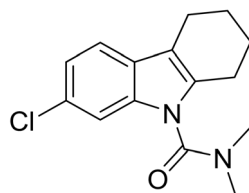

**7-chloro-*N,N*-dimethyl-1,2,3,4-tetrahydro-9*H*-carbazole-9-carboxamide (1l)**

Faint yellow solid; m.p. 90-91 °C;  $^1\text{H NMR}$  (600 MHz,  $\text{CDCl}_3$ )  $\delta$  7.10 (d,  $J = 7.1$  Hz, 1H), 7.06-7.03 (m, 2H), 3.11-2.95 (m, 8H), 2.75 (s, 2H), 1.93-1.81 (m, 4H);  $^{13}\text{C NMR}$  (125 MHz,  $\text{CDCl}_3$ )  $\delta$  153.8, 136.0, 135.9, 126.0, 125.6, 122.5, 121.3, 113.4, 109.6, 77.2, 37.7, 22.9, 22.9, 22.4; **HRMS** calcd. for  $\text{C}_{15}\text{H}_{18}\text{ClN}_2\text{O}$   $[\text{M}+\text{H}]^+$ : 277.1102, found: 277.1101.

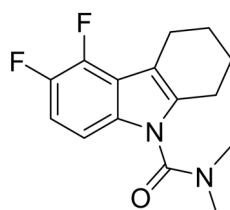

**5,6-difluoro-*N,N*-dimethyl-1,2,3,4-tetrahydro-9*H*-carbazole-9-carboxamide (1m)**

White solid, m.p. 78-79 °C;  $^1\text{H NMR}$  (600 MHz,  $\text{CDCl}_3$ )  $\delta$  6.95 (ddd,  $J = 10.7$ , 8.9, 7.4 Hz, 1H), 6.88 (dd,  $J = 8.8$ , 3.3 Hz, 1H), 3.03 (s, 6H), 2.89-2.84 (m, 2H), 2.75 (s, 2H), 1.88-1.85 (m, 4H);  $^{13}\text{C NMR}$  (125 MHz,  $\text{CDCl}_3$ )  $\delta$  153.8, 145.0 (dd,  $J = 227.5$ , 3.8 Hz), 143.4 (dd,  $J = 243.8$ , 12.5 Hz), 136.6, 132.7, 118.4 (d,  $J = 16.2$  Hz), 112.2, 111.0 (d,  $J = 21.2$  Hz), 106.4, 77.2, 37.7, 22.9, 22.6, 22.4, 22.1; **HRMS** calcd. for  $\text{C}_{15}\text{H}_{17}\text{F}_2\text{N}_2\text{O}$   $[\text{M}+\text{H}]^+$ : 279.1303, found: 279.1301.

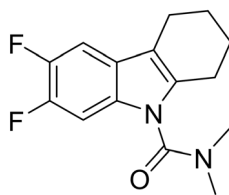

**6,7-difluoro-*N,N*-dimethyl-1,2,3,4-tetrahydro-9*H*-carbazole-9-carboxamide (1n)**

Yellow solid, m.p. 71-72 °C;  $^1\text{H NMR}$  (600 MHz,  $\text{CDCl}_3$ )  $\delta$  7.15 (dd,  $J = 10.4, 7.7$  Hz, 1H), 7.05 (dd,  $J = 10.8, 6.6$  Hz, 1H), 3.03 (s, 6H), 2.75 (d,  $J = 7.3$  Hz, 2H), 2.68-2.55 (m, 2H), 1.89-1.85 (m, 4H);  $^{13}\text{C NMR}$  (150 MHz,  $\text{CDCl}_3$ )  $\delta$  154.1, 147.7 (dd,  $J = 240.0, 15.0$  Hz), 146.8 (dd,  $J = 238.5, 15.0$  Hz), 136.7, 130.0 (d,  $J = 9.0$  Hz), 124.0 (d,  $J = 7.5$  Hz), 113.6, 105.0 (d,  $J = 18.0$  Hz), 100.1 (d,  $J = 24.0$  Hz), 77.2, 37.9, 23.0, 22.8, 22.5, 20.7; **HRMS** calcd.  $\text{C}_{15}\text{H}_{17}\text{F}_2\text{N}_2\text{O}$   $[\text{M}+\text{H}]^+$ : 279.1303, found: 279.1304.

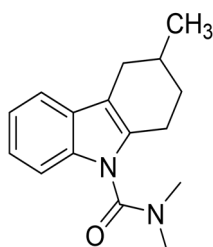

***N,N*,3-trimethyl-1,2,3,4-tetrahydro-9*H*-carbazole-9-carboxamide (1o)**

Yellow solid, m.p. 60-61 °C;  $^1\text{H NMR}$  (600 MHz,  $\text{CDCl}_3$ )  $\delta$  7.43 (d,  $J = 7.5$  Hz, 1H), 7.23 (d,  $J = 8.1$  Hz, 1H), 7.20-7.16 (m, 1H), 7.14 (td,  $J = 7.4, 1.2$  Hz, 1H), 3.06 (s, 3H), 3.03 (s, 3H), 2.83 (d,  $J = 5.3$  Hz, 2H), 2.82-2.79 (m, 1H), 2.28-2.23 (m, 1H), 2.02-1.90 (m, 2H), 1.58-1.51 (m, 1H), 1.14 (d,  $J = 6.5$  Hz, 3H);  $^{13}\text{C NMR}$  (150 MHz,  $\text{CDCl}_3$ )  $\delta$  154.6, 135.2, 135.1, 128.5, 122.1, 120.7, 118.0, 113.7, 111.4, 77.2, 38.0, 37.7, 31.3, 29.2, 29.0, 22.6, 21.6; **HRMS** calcd. for  $\text{C}_{16}\text{H}_{21}\text{N}_2\text{O}$   $[\text{M}+\text{H}]^+$ : 257.1648, found: 257.1647.

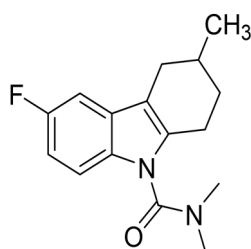

**6-fluoro-*N,N*,3-trimethyl-1,2,3,4-tetrahydro-9*H*-carbazole-9-carboxamide (1p)**

Faint yellow solid, m.p. 80-81 °C; <sup>1</sup>H NMR (600 MHz, CDCl<sub>3</sub>) δ 7.14 (dd, *J* = 8.8, 4.3 Hz, 1H), 7.06 (dd, *J* = 9.1, 2.5 Hz, 1H), 6.90 (td, *J* = 9.0, 2.6 Hz, 1H), 3.04 (s, 3H), 3.02 (s, 3H), 2.81 (s, 2H), 2.79-2.71 (m, 1H), 2.23-2.18 (m, 1H), 2.01-1.86 (m, 2H), 1.56-1.49 (m, 1H), 1.13 (d, *J* = 6.5 Hz, 3H); <sup>13</sup>C NMR (150 MHz, CDCl<sub>3</sub>) δ 158.5 (d, *J* = 235.5 Hz), 154.5, 137.0, 131.7, 129.2 (d, *J* = 10.5 Hz), 113.8, 112.0 (d, *J* = 9.0 Hz), 109.9 (d, *J* = 25.5 Hz), 103.6 (d, *J* = 24.0 Hz), 77.2, 38.1, 37.8, 31.2, 29.2, 29.1, 22.8, 21.6; HRMS calcd. for C<sub>16</sub>H<sub>20</sub>FN<sub>2</sub>O [M+H]<sup>+</sup>: 275.1554, found: 275.1555.

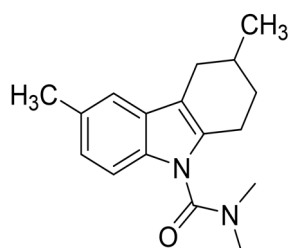

***N,N*,3,6-tetramethyl-1,2,3,4-tetrahydro-9*H*-carbazole-9-carboxamide (1q)**

Faint yellow oil; <sup>1</sup>H NMR (600 MHz, CDCl<sub>3</sub>) δ 7.22-7.20 (m, 1H), 7.10 (d, *J* = 8.3 Hz, 1H), 7.02-6.98 (m, 1H), 3.04 (s, 3H), 3.02 (s, 3H), 2.84-2.79 (m, 2H), 2.81-2.76 (m, 1H), 2.43 (s, 3H), 2.24-2.19 (m, 1H), 2.00-1.91 (m, 2H), 1.55-1.49 (m, 1H), 1.13 (d, *J* = 6.5 Hz, 3H); <sup>13</sup>C NMR (150 MHz, CDCl<sub>3</sub>) δ 155.2, 135.7, 133.9, 130.5, 129.1, 123.8, 118.4, 113.9, 111.5, 77.2, 38.6, 38.1, 31.7, 29.7, 29.5, 23.1, 22.0, 21.7; HRMS calcd. for C<sub>17</sub>H<sub>23</sub>N<sub>2</sub>O [M+H]<sup>+</sup>: 271.1805, found: 271.1806.

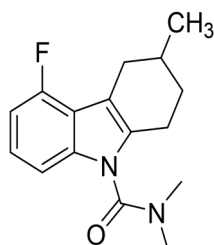

**5-fluoro-*N,N*,3-trimethyl-1,2,3,4-tetrahydro-9*H*-carbazole-9-carboxamide (1r)**

Faint yellow solid, m.p. 70-71 °C; <sup>1</sup>H NMR (500 MHz, CDCl<sub>3</sub>) δ 7.31 (dd, *J* = 8.5, 5.4 Hz, 1H), 6.95 (dd, *J* = 9.9, 2.3 Hz, 1H), 6.89 (ddd, *J* = 9.5, 8.6, 2.3 Hz, 1H), 3.05 (s, 3H), 3.03 (s, 3H), 2.79 (d, *J* = 5.3 Hz, 2H), 2.76 (d, *J* = 5.1 Hz, 1H), 2.33-2.16 (m,

1H), 2.03-1.88 (m, 2H), 1.57-1.47 (m, 1H), 1.13 (d,  $J = 6.5$  Hz, 3H);  $^{13}\text{C}$  NMR (125 MHz,  $\text{CDCl}_3$ )  $\delta$  160.0 (d,  $J = 237.5$  Hz), 154.2, 135.3, 135.2, 124.8, 118.4 (d,  $J = 10.0$  Hz), 113.5, 108.8 (d,  $J = 23.8$  Hz), 98.5 (d,  $J = 27.5$  Hz), 77.2, 37.9, 37.6, 31.1, 29.1, 28.9, 22.5, 21.4; **HRMS** calcd. for  $\text{C}_{16}\text{H}_{20}\text{FN}_2\text{O}$   $[\text{M}+\text{H}]^+$ : 275.1554, found: 275.1555.

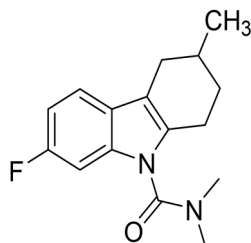

**7-fluoro-*N,N*,3-trimethyl-1,2,3,4-tetrahydro-9*H*-carbazole-9-carboxamide (1s)**

Faint yellow oil;  $^1\text{H}$  NMR (500 MHz,  $\text{CDCl}_3$ )  $\delta$  7.11 (td,  $J = 8.0, 5.1$  Hz, 1H), 7.03 (d,  $J = 8.1$  Hz, 1H), 6.81 (dd,  $J = 10.5, 7.8$  Hz, 1H), 3.14-3.02 (m, 7H), 2.84 (s, 2H), 2.58-2.38 (m, 1H), 2.10-1.92 (m, 2H), 1.65-1.60 (m, 1H), 1.18 (d,  $J = 6.5$  Hz, 3H);  $^{13}\text{C}$  NMR (125 MHz,  $\text{CDCl}_3$ )  $\delta$  156.6 (d,  $J = 245.0$  Hz), 154.1, 137.5 (d,  $J = 12.5$  Hz), 134.7, 122.4 (d,  $J = 7.5$  Hz), 116.9 (d,  $J = 20.0$  Hz), 111.7, 107.3, 106.2, 77.2, 37.6, 30.8, 30.6, 29.1, 22.4, 21.4; **HRMS** calcd. for  $\text{C}_{16}\text{H}_{20}\text{FN}_2\text{O}$   $[\text{M}+\text{H}]^+$ : 275.1554, found: 275.1555.

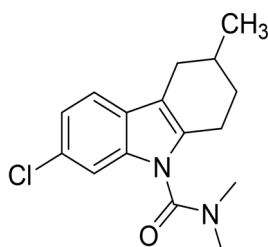

**7-chloro-*N,N*,3-trimethyl-1,2,3,4-tetrahydro-9*H*-carbazole-9-carboxamide (1t)**

Faint yellow solid, m.p. 89-90 °C;  $^1\text{H}$  NMR (600 MHz,  $\text{CDCl}_3$ )  $\delta$  7.10 (dd,  $J = 7.3, 1.7$  Hz, 1H), 7.08-7.02 (m, 2H), 3.38-3.24 (m, 1H), 3.03 (s, 3H), 3.01 (s, 3H), 2.78 (s, 2H), 2.57-2.46 (m, 1H), 1.99-1.86 (m, 2H), 1.55-1.44 (m, 1H), 1.14 (d,  $J = 6.6$  Hz, 3H);  $^{13}\text{C}$  NMR (150 MHz,  $\text{CDCl}_3$ )  $\delta$  153.9, 136.3, 135.8, 126.0, 125.5, 122.5, 121.4, 113.4, 109.7, 77.2, 37.7, 31.3, 30.6, 29.3, 22.6, 21.6; **HRMS** calcd. for  $\text{C}_{16}\text{H}_{20}\text{ClN}_2\text{O}$   $[\text{M}+\text{H}]^+$ : 291.1259, found: 291.1257.



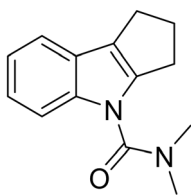

***N,N*-dimethyl-2,3-dihydrocyclopenta[*b*]indole-4(1*H*)-carboxamide (1u)**

Faint yellow solid, m.p. 96-97 °C;  $^1\text{H NMR}$  (500 MHz,  $\text{CDCl}_3$ )  $\delta$  7.41 (dd,  $J = 7.3$ , 1.6 Hz, 1H), 7.39-7.35 (m, 1H), 7.22 -7.12 (m, 2H), 3.07 (s, 6H), 2.97 (ddd,  $J = 7.8$ , 5.1, 1.7 Hz, 2H), 2.81 (ddt,  $J = 7.4$ , 5.4, 1.8 Hz, 2H), 2.53 (p,  $J = 7.2$  Hz, 2H);  $^{13}\text{C NMR}$  (125 MHz,  $\text{CDCl}_3$ )  $\delta$  155.5, 145.2, 140.4, 126.3, 123.4, 122.2, 121.7, 119.2, 113.4, 77.2, 38.6, 28.4, 27.0, 24.6; **HRMS** calcd. for  $\text{C}_{14}\text{H}_{17}\text{N}_2\text{O}$   $[\text{M}+\text{H}]^+$ : 229.1335, found: 229.1336.

The spectroscopic data are in accordance with those reported.<sup>3</sup>

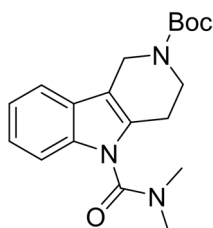

***tert*-butyl 5-(dimethylcarbamoyl)-1,3,4,5-tetrahydro-2*H*-pyrido[4,3-*b*]indole-2-carboxylate (1v)**

Faint yellow oil;  $^1\text{H NMR}$  (500 MHz,  $\text{CDCl}_3$ )  $\delta$  7.43 (d,  $J = 7.7$  Hz, 1H), 7.30-7.26 (m, 1H), 7.25-7.20 (m, 1H), 7.17 (t,  $J = 7.2$  Hz, 1H), 4.62 (s, 2H), 3.79 (s, 2H), 3.06 (s, 6H), 2.91 (s, 2H), 1.50 (s, 9H);  $^{13}\text{C NMR}$  (125 MHz,  $\text{CDCl}_3$ )  $\delta$  155.5, 154.6, 135.7, 126.8, 123.3, 121.7, 118.4, 112.2, 100.4, 80.4, 77.2, 40.9, 38.4, 28.9, 23.9; **HRMS** calcd. for  $\text{C}_{19}\text{H}_{25}\text{N}_3\text{NaO}_3$   $[\text{M}+\text{Na}]^+$ : 366.1788, found: 366.1788.

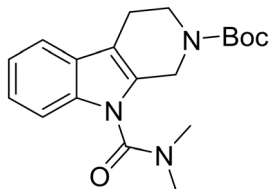

***tert*-butyl 9-(dimethylcarbamoyl)-1,3,4,9-tetrahydro-2*H*-pyrido[3,4-*b*]indole-2-carboxylate (1w)**

Faint yellow oil;  $^1\text{H NMR}$  (500 MHz,  $\text{DMSO-}d_6$ )  $\delta$  7.49 (d,  $J = 7.7$  Hz, 1H), 7.33 (d,  $J = 8.1$  Hz, 1H), 7.27-7.20 (m, 1H), 7.16 (t,  $J = 7.4$  Hz, 1H), 4.60 (s, 2H), 3.68 (t,  $J = 5.7$  Hz, 2H), 2.98 (s, 6H), 2.70 (t,  $J = 5.8$  Hz, 2H), 1.43 (s, 9H);  $^{13}\text{C NMR}$  (125 MHz,  $\text{DMSO-}d_6$ )  $\delta$  154.2, 153.0, 134.6, 131.9, 127.1, 122.9, 121.0, 118.3, 111.9, 79.3, 41.4, 39.5, 37.6, 28.0; **HRMS** calcd. for  $\text{C}_{19}\text{H}_{25}\text{N}_3\text{NaO}_3$   $[\text{M}+\text{Na}]^+$ : 366.1788, found: 366.1786.

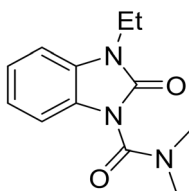

**3-ethyl-*N,N*-dimethyl-2-oxo-2,3-dihydro-1*H*-benzo[*d*]imidazole-1-carboxamide (1x)**

White solid, m.p. 63-64 °C;  $^1\text{H NMR}$  (500 MHz,  $\text{CDCl}_3$ )  $\delta$  7.33 (dd,  $J = 7.8, 1.3$  Hz, 1H), 7.16 (td,  $J = 7.7, 1.3$  Hz, 1H), 7.11 (td,  $J = 7.7, 1.3$  Hz, 1H), 7.01 (dd,  $J = 7.7, 1.2$  Hz, 1H), 3.92 (q,  $J = 7.2$  Hz, 2H), 3.17 (s, 6H), 1.35 (t,  $J = 7.3$  Hz, 3H);  $^{13}\text{C NMR}$  (125 MHz,  $\text{CDCl}_3$ )  $\delta$  151.2, 150.7, 129.3, 127.1, 122.6, 121.5, 111.8, 107.5, 77.2, 38.3, 35.7, 13.0; **HRMS** calcd. for  $\text{C}_{12}\text{H}_{16}\text{N}_3\text{O}_2$   $[\text{M}+\text{H}]^+$ : 234.1237, found: 234.1236.

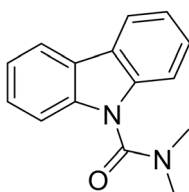

***N,N*-dimethyl-9*H*-carbazole-9-carboxamide (1y)**

Faint yellow solid, m.p. 138-139 °C;  $^1\text{H NMR}$  (600 MHz,  $\text{CDCl}_3$ )  $\delta$  8.06 (d,  $J = 7.8$  Hz, 2H), 7.59 (d,  $J = 8.3$  Hz, 2H), 7.48 (ddd,  $J = 8.3, 7.1, 1.3$  Hz, 2H), 7.38-7.30 (m, 2H), 3.10 (s, 6H);  $^{13}\text{C NMR}$  (150 MHz,  $\text{CDCl}_3$ )  $\delta$  155.1, 138.9, 126.8, 124.6, 121.7, 120.5, 112.9, 77.2, 38.3; **HRMS** calcd. for  $\text{C}_{15}\text{H}_{15}\text{N}_2\text{O}$   $[\text{M}+\text{H}]^+$ : 239.1179, found: 239.1180.

The spectroscopic data are in accordance with those reported.<sup>5</sup>

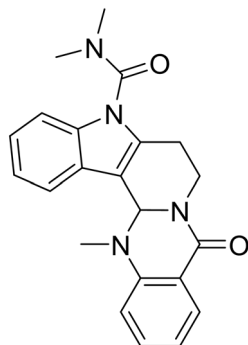

***N,N,14*-trimethyl-9-oxo-6,9,14,14a-tetrahydroindolo[3',2':3,4]pyrido[2,1-*b*]quinazoline-5(7*H*)-carboxamide (4)**

Yellow solid, m.p. 218-220 °C; <sup>1</sup>H NMR (500 MHz, CDCl<sub>3</sub>) δ 8.11 (dd, *J* = 7.9, 1.5 Hz, 1H), 7.62 (d, *J* = 7.8 Hz, 1H), 7.48 (td, *J* = 7.7, 1.5 Hz, 1H), 7.36 (dd, *J* = 8.4, 2.5 Hz, 2H), 7.30-7.24 (m, 1H), 7.22-7.16 (m, 1H), 7.10 (d, *J* = 7.9 Hz, 1H), 6.16 (s, 1H), 5.07-4.89 (m, 1H), 3.38-3.28 (m, 1H), 3.22 (s, 3H), 3.09 (s, 3H), 3.04-2.93 (m, 2H), 2.58 (s, 3H); <sup>13</sup>C NMR (125 MHz, CDCl<sub>3</sub>) δ 164.8, 153.6, 150.6, 136.0, 133.0, 129.9, 128.8, 126.8, 124.3, 123.8, 123.3, 122.4, 121.5, 119.4, 117.6, 111.6, 77.2, 68.6, 39.4, 38.0, 37.1, 29.3, 20.2; HRMS calcd. for C<sub>22</sub>H<sub>23</sub>N<sub>4</sub>O<sub>2</sub> [M+H]<sup>+</sup>: 375.1816, found: 375.1816.

**References**

- 1 Y. Xie, Y. Zhao, B. Qian, L. Yang, C. Xia and H. Huang, *Angew Chem Int Ed.*, 2011, **50**, 5682.
- 2 L. Ye, S. H. Cai, D. X. Wang, Y. Q. Wang, L. J. Lai, C. Feng and T. P. Loh, *Org Lett.*, 2017, **19**, 6164.
- 3 Y. Nakano and D. W. Lupton, *Chem Commun.*, 2014, **50**, 1757.
- 4 Compounds **1u'**, **1v'**, **1w'**, **1x'**, **1y'**, **4'** are obtained from commercial sources.
- 5 X.-F. H. P. Cao, H. Ding, H. M. Ge, H. Q. Li, B. F. Ruan and H. Li. Zhu, *Chem. Biodiv.*, 2007, **4**, 881.

## 2.2 Optimization Studies

**Table S1.** Screening of time <sup>a</sup>

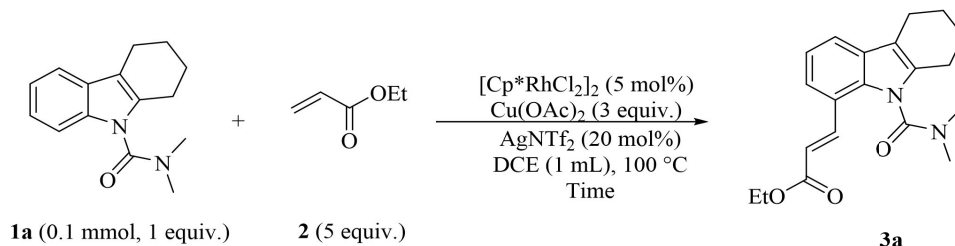

| entry | time (h) | yield <sup>a</sup> (%) |
|-------|----------|------------------------|
| 1     | 36       | 80                     |
| 2     | 24       | 74                     |
| 3     | 12       | 86                     |
| 4     | 6        | 67                     |

<sup>a</sup>Data were obtained by <sup>1</sup>H NMR analysis with  $\text{CH}_2\text{Br}_2$  as reference.

**Table S2.** Screening of temperature <sup>a</sup>

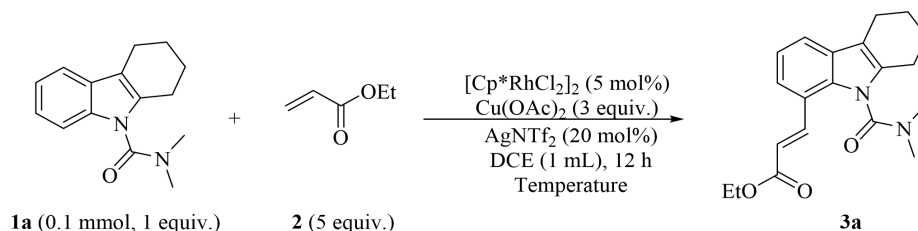

| entry | temperature (°C) | yield <sup>a</sup> (%) |
|-------|------------------|------------------------|
| 1     | 100              | 86                     |
| 2     | 80               | 93                     |
| 3     | 40               | 26                     |

<sup>a</sup>Data were obtained by <sup>1</sup>H NMR analysis with  $\text{CH}_2\text{Br}_2$  as reference.

After completing the conditional screening, it was later found that the reaction can also be carried out in water with a yield of 90%. Therefore, the reaction conditions were further optimized.

**Table S3.** Screening of catalyst amount <sup>a</sup>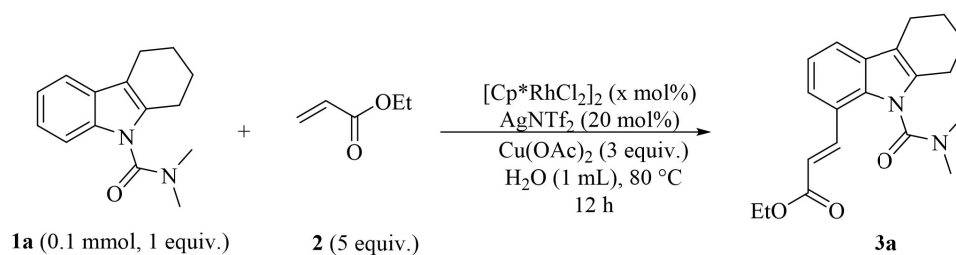

| entry | x   | yield <sup>a</sup> (%) |
|-------|-----|------------------------|
| 1     | 5   | 96                     |
| 2     | 4   | 92                     |
| 3     | 2.5 | 64                     |
| 4     | 1   | 24                     |

<sup>a</sup> Data were obtained by <sup>1</sup>H NMR analysis with  $\text{CH}_2\text{Br}_2$  as reference.

**Table S4.** Screening of oxidant amount <sup>a</sup>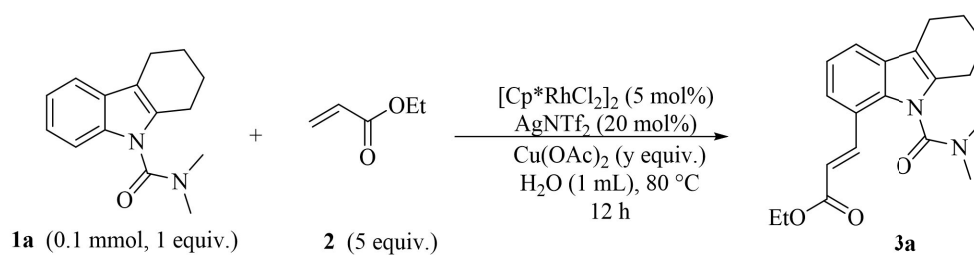

| entry | y | yield <sup>a</sup> (%) |
|-------|---|------------------------|
| 1     | 3 | 96                     |
| 2     | 2 | 84                     |
| 3     | 1 | 40                     |

<sup>a</sup> Data were obtained by <sup>1</sup>H NMR analysis with  $\text{CH}_2\text{Br}_2$  as reference.

**Table S5.** Screening of olefinated reagent amount <sup>a</sup>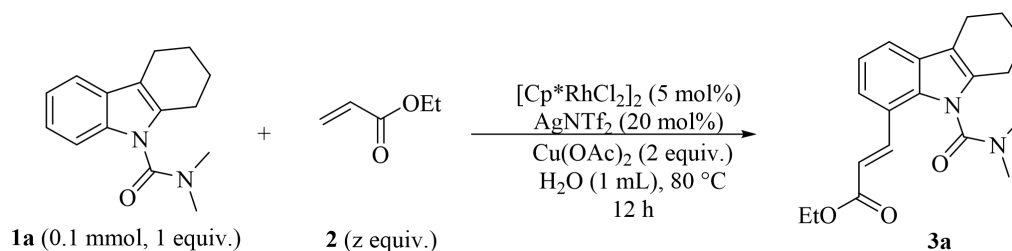

| entry | z | yield <sup>a</sup> (%) |
|-------|---|------------------------|
| 1     | 5 | 96                     |
| 2     | 3 | 92                     |
| 3     | 2 | 86                     |

<sup>a</sup> Data were obtained by <sup>1</sup>H NMR analysis with  $\text{CH}_2\text{Br}_2$  as reference.

**Table S6.** Optimization of deuterium conditions <sup>a</sup>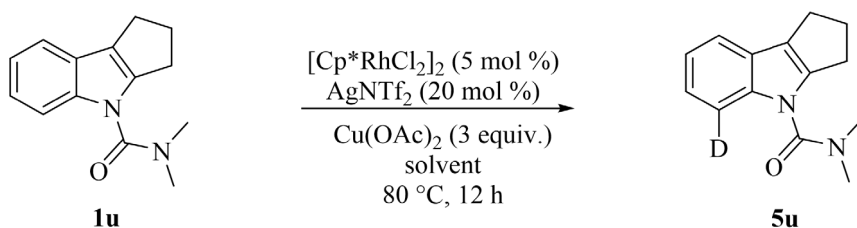

| entry | solvent                        | deuterium incorporation (%) <sup>b</sup> | yield (%) <sup>c</sup> |
|-------|--------------------------------|------------------------------------------|------------------------|
| 1     | $\text{D}_2\text{O}$           | 99                                       | 90                     |
| 2     | $[\text{D}_4]\text{-methanol}$ | 75                                       | 86                     |
| 3     | $[\text{D}_1]\text{-TFA}$      | 0                                        | Trace                  |
| 4     | $\text{CDCl}_3$                | --                                       | 95                     |

<sup>a</sup> **1u** (0.1 mmol, 1 equiv.),  $[\text{Cp}^*\text{RhCl}_2]_2$  (5 mol%),  $\text{AgNTf}_2$  (20 mol%),  $\text{Cu}(\text{OAc})_2$  (3 equiv.),  $\text{D}_2\text{O}$  (0.5 mL), 80 °C, 12 h. <sup>b</sup> Deuterium incorporation at the aromatic position was determined by <sup>1</sup>H NMR spectroscopy. <sup>c</sup> Data are reported as isolated yields.

### 2.3 The general procedure for rhodium-catalyzed olefination

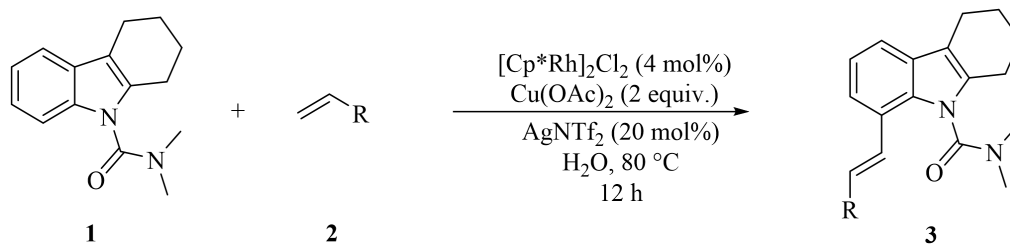

An oven-dried screw cap reaction tube was charged with a magnetic stir-bar, substrate (0.1 mmol, 1.0 equiv.), olefin (0.2 mmol, 2.0 equiv.),  $[\text{Cp}^*\text{RhCl}_2]_2$  (0.004 mmol, 4 mol%),  $\text{Cu}(\text{OAc})_2$  (0.2 mmol, 2.0 equiv.), and  $\text{AgNTf}_2$  (0.02 mmol, 20 mol%) were taken. Subsequently,  $\text{H}_2\text{O}$  (1 mL) was added and the reaction mixture was stirred vigorously at  $80\text{ }^\circ\text{C}$  for 12 h. The reaction mixture was then diluted with EtOAc and filtered through celite pad. After evaporation of the solvent, the crude mixture was purified by preparative Thin-Layer Chromatography (petroleum ether/ethyl acetate = 3:1).

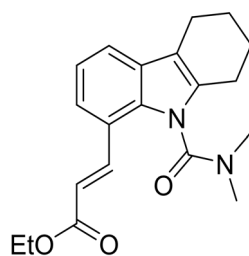

#### ethyl (*E*)-3-(9-(dimethylcarbamoyl)-2,3,4,9-tetrahydro-1*H*-carbazol-8-yl)acrylate

##### (3a)

Yellow oil, 28 mg, 84% yield;  $^1\text{H NMR}$  (500 MHz,  $\text{CDCl}_3$ )  $\delta$  7.96 (d,  $J = 15.6$  Hz, 1H), 7.47 (d,  $J = 7.7$  Hz, 1H), 7.36 (d,  $J = 7.5$  Hz, 1H), 7.13 (t,  $J = 7.6$  Hz, 1H), 6.41 (d,  $J = 15.6$  Hz, 1H), 4.27 (q,  $J = 7.2$  Hz, 2H), 3.19 (s, 3H), 2.94-2.81 (m, 1H), 2.75-2.65 (m, 2H), 2.60 (s, 3H), 2.58-2.46 (m, 1H), 1.98-1.89 (m, 2H), 1.89-1.82 (m, 2H), 1.34 (t,  $J = 7.1$  Hz, 3H);  $^{13}\text{C NMR}$  (125 MHz,  $\text{CDCl}_3$ )  $\delta$  166.9, 154.9, 140.2, 135.3, 133.3, 129.4, 121.1, 120.8, 120.3, 119.4, 119.2, 112.7, 77.2, 60.6, 38.0, 36.6,

23.0, 22.9, 22.2, 20.8, 14.5; **HRMS** calcd. for C<sub>20</sub>H<sub>25</sub>N<sub>2</sub>O<sub>3</sub> [M+H]<sup>+</sup>: 341.1860, found: 341.1860.

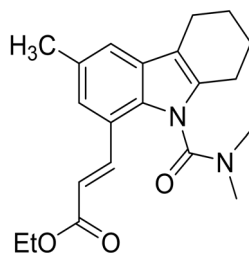

**ethyl(*E*)-3-(9-(dimethylcarbamoyl)-6-methyl-2,3,4,9-tetrahydro-1*H*-carbazol-8-yl)acrylate (3b)**

Yellow oil, 29 mg, 80% yield; <sup>1</sup>H NMR (500 MHz, CDCl<sub>3</sub>) δ 7.92 (d, *J* = 15.6 Hz, 1H), 7.27 (s, 1H), 7.20 (s, 1H), 6.40 (d, *J* = 15.6 Hz, 1H), 4.46-4.17 (m, 2H), 3.18 (s, 3H), 2.93-2.80 (m, 1H), 2.65 (d, *J* = 5.3 Hz, 2H), 2.59 (s, 3H), 2.55-2.46 (m, 1H), 2.43 (s, 3H), 1.94-1.89 (m, 2H), 1.87-1.83 (m, 2H), 1.34 (t, *J* = 7.1 Hz, 3H); <sup>13</sup>C NMR (125 MHz, CDCl<sub>3</sub>) δ 166.7, 154.8, 140.0, 135.2, 131.5, 129.9, 129.5, 122.0, 120.3, 118.8, 118.7, 112.0, 77.2, 60.3, 37.7, 36.3, 22.8, 22.7, 22.0, 21.1, 20.6, 14.3; **HRMS** calcd. for C<sub>21</sub>H<sub>27</sub>N<sub>2</sub>O<sub>3</sub> [M+H]<sup>+</sup>: 355.2016, found: 355.2014.

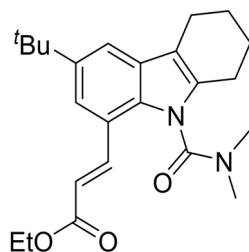

**ethyl (*E*)-3-(6-(*tert*-butyl)-9-(dimethylcarbamoyl)-2,3,4,9-tetrahydro-1*H*-carbazol-8-yl)acrylate (3c)**

Yellow oil, 29 mg, 79% yield; <sup>1</sup>H NMR (600 MHz, CDCl<sub>3</sub>) δ 7.95 (d, *J* = 15.6 Hz, 1H), 7.46 (d, *J* = 1.8 Hz, 1H), 7.41 (d, *J* = 1.8 Hz, 1H), 6.42 (d, *J* = 15.6 Hz, 1H), 4.27 (q, *J* = 7.1 Hz, 2H), 3.18 (s, 3H), 2.89-2.79 (m, 1H), 2.73-2.67 (m, 2H), 2.64 (s, 3H), 2.55-2.48 (m, 1H), 1.97-1.88 (m, 2H), 1.88-1.82 (m, 2H), 1.38 (s, 9H), 1.35 (t, *J* = 7.1 Hz, 3H); <sup>13</sup>C NMR (150 MHz, CDCl<sub>3</sub>) δ 166.8, 154.9, 143.7, 140.6, 135.3, 131.5, 129.2, 118.8, 118.6, 118.5, 116.6, 112.5, 77.2, 60.4, 37.9, 36.4, 34.6, 31.8, 22.9, 22.7,



22.1, 20.7, 14.3; **HRMS** calcd. for C<sub>24</sub>H<sub>33</sub>N<sub>2</sub>O<sub>3</sub> [M+H]<sup>+</sup>: 397.2486, found: 397.2486.

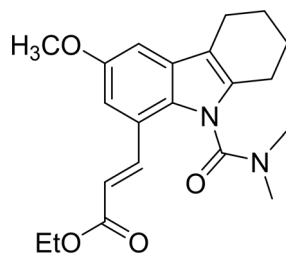

**ethyl (*E*)-3-(9-(dimethylcarbamoyl)-6-methoxy-2,3,4,9-tetrahydro-1*H*-carbazol-8-yl)acrylate (3d)**

Yellow oil, 30 mg, 83% yield; <sup>1</sup>H NMR (600 MHz, CDCl<sub>3</sub>) δ 7.90 (d, *J* = 15.6 Hz, 1H), 7.11-6.85 (m, 2H), 6.39 (d, *J* = 15.6 Hz, 1H), 4.27 (q, *J* = 7.2, 2H), 3.86 (s, 3H), 3.17 (s, 3H), 2.89-2.81 (m, 1H), 2.66-2.62 (m, 2H), 2.61 (s, 3H), 2.54-2.47 (m, 1H), 1.96-1.88 (m, 2H), 1.88-1.83 (m, 2H), 1.34 (t, *J* = 7.2 Hz, 3H); <sup>13</sup>C NMR (150 MHz, CDCl<sub>3</sub>) δ 166.6, 154.8, 154.5, 139.7, 136.1, 130.2, 128.6, 119.7, 119.4, 112.3, 108.8, 103.6, 77.2, 60.4, 55.9, 37.8, 36.4, 22.8, 22.7, 22.2, 20.7, 14.3; **HRMS** calcd. for C<sub>21</sub>H<sub>26</sub>N<sub>2</sub>NaO<sub>4</sub> [M+Na]<sup>+</sup>: 393.1785 found: 393.1783.

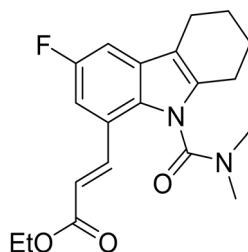

**ethyl (*E*)-3-(9-(dimethylcarbamoyl)-6-fluoro-2,3,4,9-tetrahydro-1*H*-carbazol-8-yl)acrylate (3e)**

Yellow oil, 26 mg, 74% yield; <sup>1</sup>H NMR (600 MHz, CDCl<sub>3</sub>) δ 7.88 (dd, *J* = 15.6 Hz, 1H), 7.12 (dd, *J* = 8.6, 2.5 Hz, 1H), 7.09 (dd, *J* = 10.0, 2.5 Hz, 1H), 6.39 (d, *J* = 15.6 Hz, 1H), 4.27 (q, *J* = 7.1 Hz, 2H), 3.19 (s, 3H), 2.89-2.81 (m, 1H), 2.63 (s, 5H), 2.55-2.48 (m, 1H), 1.98-1.89 (m, 2H), 1.89-1.82 (m, 2H), 1.35 (t, *J* = 7.1 Hz, 3H); <sup>13</sup>C NMR (125 MHz, CDCl<sub>3</sub>) δ 166.5, 158.2 (d, *J* = 235.0 Hz), 154.7, 139.0, 137.3, 130.4 (d, *J* = 10.0 Hz), 130.0, 120.5, 120.0 (d, *J* = 8.8 Hz), 112.9 (d, *J* = 5.0 Hz), 108.1 (d, *J* = 26.2 Hz), 105.8 (d, *J* = 23.8 Hz), 77.2, 60.8, 38.0, 36.7, 23.0, 22.8, 22.3, 20.8, 14.5;

$^{19}\text{F}$  NMR (471 MHz,  $\text{CDCl}_3$ )  $\delta$  -123.2; HRMS calcd. for  $\text{C}_{20}\text{H}_{24}\text{FN}_2\text{O}_3$   $[\text{M}+\text{H}]^+$ : 359.1765 found: 359.1758.

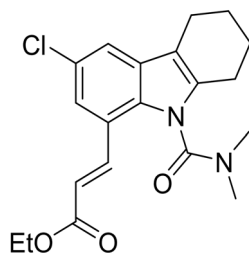

**ethyl (*E*)-3-(6-chloro-9-(dimethylcarbamoyl)-2,3,4,9-tetrahydro-1*H*-carbazol-8-yl)acrylate (3f)**

Yellow oil, 25 mg, 68% yield;  $^1\text{H}$  NMR (600 MHz,  $\text{CDCl}_3$ )  $\delta$  7.86 (d,  $J = 15.6$  Hz, 1H), 7.42 (d,  $J = 1.9$  Hz, 1H), 7.31 (d,  $J = 1.9$  Hz, 1H), 6.40 (d,  $J = 15.6$  Hz, 1H), 4.27 (q,  $J = 7.1$  Hz, 2H), 3.18 (s, 3H), 2.95-2.81 (m, 1H), 2.63 (d,  $J = 5.6$  Hz, 2H), 2.60 (s, 3H), 2.55-2.45 (m, 1H), 2.00-1.89 (m, 2H), 1.89-1.81 (m, 2H), 1.34 (t,  $J = 7.2$  Hz, 3H);  $^{13}\text{C}$  NMR (150 MHz,  $\text{CDCl}_3$ )  $\delta$  166.3, 154.2, 138.6, 136.7, 131.4, 130.4, 126.4, 120.4, 120.4, 120.1, 119.4, 112.2, 77.2, 60.6, 37.8, 36.5, 22.7, 22.5, 22.0, 20.5, 14.3; HRMS calcd. for  $\text{C}_{20}\text{H}_{24}\text{ClN}_2\text{O}_3$   $[\text{M}+\text{H}]^+$ : 375.1470, found: 375.1469.

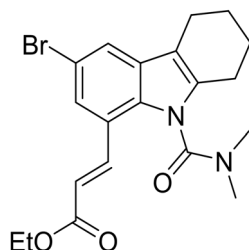

**ethyl (*E*)-3-(6-bromo-9-(dimethylcarbamoyl)-2,3,4,9-tetrahydro-1*H*-carbazol-8-yl)acrylate (3g)**

Yellow oil, 22 mg, 54% yield;  $^1\text{H}$  NMR (600 MHz,  $\text{CDCl}_3$ )  $\delta$  7.85 (d,  $J = 15.6$  Hz, 1H), 7.57 (d,  $J = 1.8$  Hz, 1H), 7.44 (d,  $J = 1.8$  Hz, 1H), 6.40 (d,  $J = 15.6$  Hz, 1H), 4.26 (q,  $J = 7.1$  Hz, 2H), 3.18 (s, 3H), 2.92-2.81 (m, 1H), 2.63 (t,  $J = 5.8$  Hz, 2H), 2.59 (s, 3H), 2.56-2.46 (m, 1H), 1.99-1.88 (m, 2H), 1.88-1.79 (m, 2H), 1.34 (t,  $J = 7.1$  Hz, 3H);  $^{13}\text{C}$  NMR (150 MHz,  $\text{CDCl}_3$ )  $\delta$  166.3, 154.1, 138.5, 136.5, 131.7, 130.9, 123.1, 122.4, 120.6, 120.4, 113.8, 112.1, 77.2, 60.6, 37.8, 36.5, 22.7, 22.5, 22.0, 20.5, 14.3;

HRMS calcd. for C<sub>20</sub>H<sub>24</sub>BrN<sub>2</sub>O<sub>3</sub> [M+H]<sup>+</sup>: 419.0965, found: 419.0967.

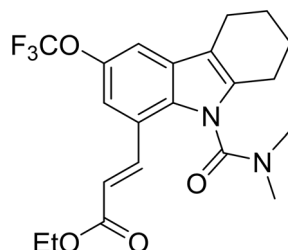

**ethyl (*E*)-3-(9-(dimethylcarbamoyl)-6-(trifluoromethoxy)-2,3,4,9-tetrahydro-1*H*-carbazol-8-yl)acrylate (3h)**

Yellow oil, 27 mg, 65% yield; <sup>1</sup>H NMR (500 MHz, CDCl<sub>3</sub>) δ 7.89 (d, *J* = 15.6 Hz, 1H), 7.31 (d, *J* = 2.2 Hz, 1H), 7.22-7.19 (m, 1H), 6.41 (d, *J* = 15.6 Hz, 1H), 4.27 (q, *J* = 7.0 Hz, 2H), 3.20 (s, 3H), 2.87-2.83 (m, 1H), 2.65 (s, 5H), 2.55-2.49 (m, 1H), 1.93-1.91 (m, 2H), 1.89-1.87 (m, 2H), 1.35 (t, *J* = 7.1 Hz, 3H); <sup>13</sup>C NMR (125 MHz, CDCl<sub>3</sub>) δ 166.2, 154.1, 143.5, 138.5, 137.2, 131.3, 129.9, 121.6, 120.7, 119.8, 113.9, 112.8, 112.3, 77.2, 60.6, 37.8, 36.5, 22.7, 22.5, 22.0, 20.5, 14.2; <sup>19</sup>F NMR (471 MHz, CDCl<sub>3</sub>) δ -58.0; HRMS calcd. for C<sub>21</sub>H<sub>24</sub>F<sub>3</sub>N<sub>2</sub>O<sub>4</sub> [M+H]<sup>+</sup>: 425.1683, found: 425.1682.

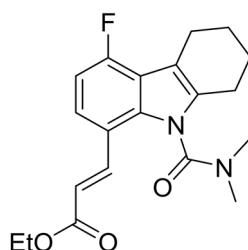

**ethyl (*E*)-3-(9-(dimethylcarbamoyl)-5-fluoro-2,3,4,9-tetrahydro-1*H*-carbazol-8-yl)acrylate (3i)**

Yellow solid, 23 mg, 65% yield, m.p. 110-111 °C; <sup>1</sup>H NMR (600 MHz, CDCl<sub>3</sub>) δ 7.73 (d, *J* = 16.0 Hz, 1H), 7.35 (dd, *J* = 8.5, 4.9 Hz, 1H), 6.94 (dd, *J* = 11.6, 8.5 Hz, 1H), 6.58 (d, *J* = 16.0 Hz, 1H), 4.27 (qd, *J* = 7.2, 2.7 Hz, 2H), 3.18 (s, 3H), 2.85-2.79 (m, 1H), 2.68 (s, 3H), 2.67-2.63 (m, 2H), 2.55-2.48 (m, 1H), 1.95-1.88 (m, 2H), 1.88-1.82 (m, 2H), 1.35 (t, *J* = 7.1 Hz, 3H); <sup>13</sup>C NMR (150 MHz, CDCl<sub>3</sub>) δ 167.1, 158.5 (d, *J* = 246.0 Hz), 154.6, 135.6, 133.7, 133.6 (d, *J* = 7.5 Hz), 125.8, 123.6 (d, *J* = 12.0 Hz),

120.1, 112.7, 109.5 (d,  $J = 25.5$  Hz), 107.7 (d,  $J = 18.0$  Hz), 77.2, 60.7, 38.0, 36.6, 22.9, 22.8, 22.2, 20.7, 14.5;  $^{19}\text{F}$  NMR (471 MHz,  $\text{CDCl}_3$ )  $\delta$  -119.6; HRMS calcd. for  $\text{C}_{20}\text{H}_{24}\text{FN}_2\text{O}_3$   $[\text{M}+\text{H}]^+$ : 359.1765, found: 359.1757.

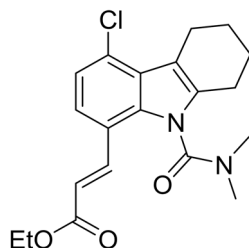

**ethyl (*E*)-3-(5-chloro-9-(dimethylcarbamoyl)-2,3,4,9-tetrahydro-1*H*-carbazol-8-yl)acrylate (3j)**

Yellow oil, 20 mg, 53% yield;  $^1\text{H}$  NMR (500 MHz,  $\text{CDCl}_3$ )  $\delta$  7.86 (d,  $J = 16.2$  Hz, 1H), 7.33 (d,  $J = 8.3$  Hz, 1H), 7.19 (d,  $J = 8.3$  Hz, 1H), 6.26 (d,  $J = 16.3$  Hz, 1H), 4.28 (q,  $J = 7.1$  Hz, 2H), 3.04 (s, 3H), 2.78 (dd,  $J = 14.2, 8.8$  Hz, 1H), 2.69 (s, 3H), 2.68-2.61 (m, 2H), 2.57-2.47 (m, 1H), 1.92-1.83 (m, 4H), 1.35 (t,  $J = 7.1$  Hz, 3H);  $^{13}\text{C}$  NMR (125 MHz,  $\text{CDCl}_3$ )  $\delta$  166.2, 153.9, 138.0, 136.0, 133.8, 128.1, 127.3, 124.7, 122.3, 119.1, 118.5, 112.8, 77.2, 60.6, 37.8, 36.1, 22.7, 22.6, 22.2, 20.5, 14.3; HRMS calcd. for  $\text{C}_{20}\text{H}_{24}\text{ClN}_2\text{O}_3$   $[\text{M}+\text{H}]^+$ : 375.1470, found: 375.1469.

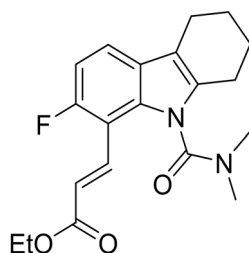

**ethyl (*E*)-3-(9-(dimethylcarbamoyl)-7-fluoro-2,3,4,9-tetrahydro-1*H*-carbazol-8-yl)acrylate (3k)**

Yellow oil, 17 mg, 47% yield;  $^1\text{H}$  NMR (500 MHz,  $\text{CDCl}_3$ )  $\delta$  7.87 (d,  $J = 15.6$  Hz, 1H), 7.28 (d,  $J = 4.9$  Hz, 1H), 6.78 (dd,  $J = 10.0, 8.3$  Hz, 1H), 6.34 (d,  $J = 15.6$  Hz, 1H), 4.26 (q,  $J = 7.1$  Hz, 2H), 3.20 (s, 3H), 2.87 (d,  $J = 5.9$  Hz, 2H), 2.61 (s, 3H), 2.46-2.50 (m, 2H), 1.96-1.88 (m, 2H), 1.86 (dd,  $J = 7.9, 4.4$  Hz, 2H), 1.34 (t,  $J = 7.1$  Hz, 3H);  $^{13}\text{C}$  NMR (125 MHz,  $\text{CDCl}_3$ )  $\delta$  166.6, 157.9 (d,  $J = 250.0$  Hz), 154.0, 139.0,

135.2 (d,  $J = 12.5$  Hz), 134.7, 121.7 (d,  $J = 7.5$  Hz), 118.6, 117.4 (d,  $J = 21.2$  Hz), 115.7, 110.7, 106.6 (d,  $J = 20.0$  Hz), 77.2, 60.4, 37.7, 36.4, 22.7, 22.4, 22.0, 21.9, 14.3;  $^{19}\text{F}$  NMR (471 MHz,  $\text{CDCl}_3$ )  $\delta$  -121.2; HRMS calcd. for  $\text{C}_{20}\text{H}_{24}\text{FN}_2\text{O}_3$   $[\text{M}+\text{H}]^+$ : 359.1765, found: 359.1763.

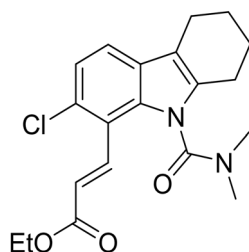

**ethyl (*E*)-3-(7-chloro-9-(dimethylcarbamoyl)-2,3,4,9-tetrahydro-1*H*-carbazol-8-yl)acrylate (3l)**

Yellow oil, 15 mg, 39% yield;  $^1\text{H}$  NMR (500 MHz,  $\text{CDCl}_3$ )  $\delta$  7.88 (d,  $J = 15.6$  Hz, 1H), 7.23 (d,  $J = 8.1$  Hz, 1H), 7.07 (d,  $J = 8.1$  Hz, 1H), 6.37 (d,  $J = 15.6$  Hz, 1H), 4.26 (q,  $J = 7.0$  Hz, 2H), 3.19 (s, 3H), 3.09-3.01 (m, 2H), 2.90-2.79 (m, 1H), 2.59 (s, 3H), 2.54-2.44 (m, 1H), 1.96-1.81 (m, 4H), 1.34 (t,  $J = 7.2$  Hz, 3H);  $^{13}\text{C}$  NMR (150 MHz,  $\text{CDCl}_3$ )  $\delta$  166.5, 154.1, 139.0, 135.9, 133.8, 128.2, 126.2, 121.6, 121.3, 119.5, 117.9, 112.5, 77.2, 60.5, 37.7, 36.5, 22.9, 22.8, 22.2, 22.1, 14.3; HRMS calcd. for  $\text{C}_{20}\text{H}_{24}\text{ClN}_2\text{O}_3$   $[\text{M}+\text{H}]^+$ : 375.1470, found: 375.1470.

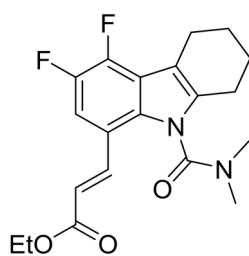

**ethyl (*E*)-3-(9-(dimethylcarbamoyl)-5,7-difluoro-2,3,4,9-tetrahydro-1*H*-carbazol-8-yl)acrylate (3m)**

Yellow oil, 22 mg, 59% yield;  $^1\text{H}$  NMR (500 MHz,  $\text{CDCl}_3$ )  $\delta$  7.80 (d,  $J = 15.5$  Hz, 1H), 7.16 (dd,  $J = 11.6, 7.3$  Hz, 1H), 6.31 (d,  $J = 15.5$  Hz, 1H), 4.26 (q,  $J = 6.9$  Hz, 2H), 3.19 (s, 3H), 2.90-2.83 (m, 2H), 2.83-2.76 (m, 1H), 2.63 (s, 3H), 2.55-2.43 (m, 1H), 1.97-1.79 (m, 4H), 1.34 (t,  $J = 7.1$  Hz, 3H);  $^{13}\text{C}$  NMR (125 MHz,  $\text{CDCl}_3$ )  $\delta$

166.2, 153.8, 144.9 (d,  $J = 237.5$  Hz), 144.6 (d,  $J = 251.2$  Hz), 137.9, 136.5, 130.5 (d,  $J = 10.0$  Hz), 129.8, 119.8, 114.8, 111.2, 109.4 (d,  $J = 21.2$  Hz), 77.2, 60.5, 37.7, 36.5, 22.6, 22.2, 21.9, 21.8, 14.2;  $^{19}\text{F}$  NMR (471 MHz,  $\text{CDCl}_3$ )  $\delta$  -147.3 (d,  $J = 23.5$  Hz), -150.1 (d,  $J = 18.8$  Hz); HRMS calcd. for  $\text{C}_{20}\text{H}_{23}\text{F}_2\text{N}_2\text{O}_3$   $[\text{M}+\text{H}]^+$ : 377.1671, found: 377.1669.

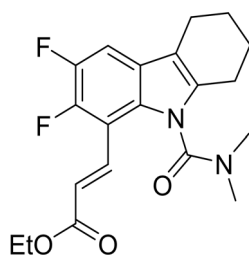

**ethyl (*E*)-3-(9-(dimethylcarbamoyl)-5,6-difluoro-2,3,4,9-tetrahydro-1*H*-carbazol-8-yl)acrylate (3n)**

Faint yellow solid, 26 mg, 69% yield, m.p. 118-120 °C;  $^1\text{H}$  NMR (500 MHz,  $\text{CDCl}_3$ )  $\delta$  7.69 (d,  $J = 16.1$  Hz, 1H), 7.19 (dd,  $J = 9.8, 7.5$  Hz, 1H), 6.59 (dd,  $J = 16.1, 1.2$  Hz, 1H), 4.28 (qd,  $J = 7.1, 1.4$  Hz, 2H), 3.17 (s, 3H), 2.86-2.76 (m, 1H), 2.69 (s, 3H), 2.65-2.57 (m, 2H), 2.54-2.45 (m, 1H), 1.94-1.88 (m, 2H), 1.88-1.81 (m, 2H), 1.35 (t,  $J = 7.1$  Hz, 3H);  $^{13}\text{C}$  NMR (125 MHz,  $\text{CDCl}_3$ )  $\delta$  167.0, 154.5, 147.4 (d,  $J = 238.8$  Hz), 146.8 (d,  $J = 262.5$  Hz), 137.1, 133.2, 129.2, 125.0 (d,  $J = 12.5$  Hz), 124.5, 113.1, 109.4 (d,  $J = 13.8$  Hz), 106.6 (d,  $J = 18.8$  Hz), 77.2, 61.1, 38.3, 36.9, 23.1, 23.0, 22.5, 21.0, 14.8;  $^{19}\text{F}$  NMR (471 MHz,  $\text{CDCl}_3$ )  $\delta$  -144.0 (d,  $J = 23.5$  Hz), -145.7 (d,  $J = 23.5$  Hz); HRMS calcd. for  $\text{C}_{20}\text{H}_{23}\text{F}_2\text{N}_2\text{O}_3$   $[\text{M}+\text{H}]^+$ : 377.1671, found: 377.1670.

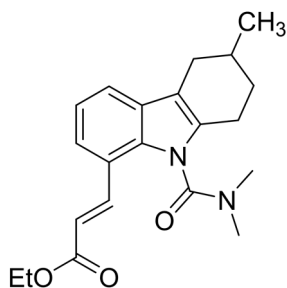

**ethyl (*E*)-3-(9-(dimethylcarbamoyl)-3-methyl-2,3,4,9-tetrahydro-1*H*-carbazol-8-yl)acrylate (3o)**

Faint yellow oil, 29 mg, 83% yield;  $^1\text{H}$  NMR (600 MHz,  $\text{CDCl}_3$ )  $\delta$  7.95 (dd,  $J = 15.6,$

1.4 Hz, 1H), 7.47 (d,  $J = 7.7$  Hz, 1H), 7.36 (d,  $J = 7.5$  Hz, 1H), 7.14 (t,  $J = 7.6$  Hz, 1H), 6.41 (dd,  $J = 15.6, 5.9$  Hz, 1H), 4.47-4.18 (m, 2H), 3.19 (s, 3H), 2.97-2.86 (m, 1H), 2.86-2.74 (m, 1H), 2.63 (s, 1H), 2.56 (s, 2H), 2.56-2.51 (m, 1H), 2.32-2.21 (m, 1H), 2.05-1.90 (m, 2H), 1.61-1.50 (m, 1H), 1.35 (t,  $J = 7.1$  Hz, 3H), 1.14 (dd,  $J = 6.5, 1.6$  Hz, 3H);  $^{13}\text{C NMR}$  (150 MHz,  $\text{CDCl}_3$ )  $\delta$  167.1, 155.3, 140.4, 135.3, 133.9, 133.6, 129.6, 121.3, 120.5, 119.7, 119.5, 112.7, 77.2, 60.8, 38.2, 36.9, 31.5, 29.6, 29.4, 22.3, 21.9, 14.7; **HRMS** calcd. for  $\text{C}_{21}\text{H}_{27}\text{N}_2\text{O}_3$   $[\text{M}+\text{H}]^+$ : 355.2016, found: 355.2013.

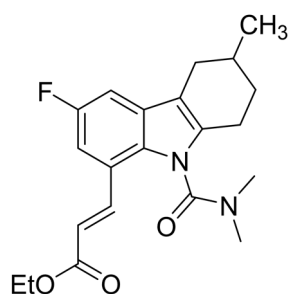

**ethyl (*E*)-3-(9-(dimethylcarbamoyl)-6-fluoro-3-methyl-2,3,4,9-tetrahydro-1*H*-carbazol-8-yl)acrylate (3p)**

Yellow solid, 28 mg, 75% yield, m.p. 123-124 °C;  $^1\text{H NMR}$  (600 MHz,  $\text{CDCl}_3$ )  $\delta$  7.86 (d,  $J = 15.5$  Hz, 1H), 7.12-7.01 (m, 2H), 6.36 (dd,  $J = 14.7, 6.2$  Hz, 1H), 4.36-4.18 (m, 2H), 3.16 (s, 3H), 2.90-2.80 (m, 1H), 2.76-2.68 (m, 1H), 2.63 (s, 3H), 2.54-2.48 (m, 1H), 2.26-2.13 (m, 1H), 2.04-1.85 (m, 2H), 1.61-1.46 (m, 1H), 1.32 (td,  $J = 7.1, 2.0$  Hz, 3H), 1.10 (d,  $J = 6.6$  Hz, 3H);  $^{13}\text{C NMR}$  (150 MHz,  $\text{CDCl}_3$ )  $\delta$  166.2, 157.9 (d,  $J = 235.5$  Hz), 154.4, 138.6 (d,  $J = 10.5$  Hz), 136.7, 130.1, 129.9, 120.1, 119.7 (d,  $J = 9.0$  Hz), 112.3, 107.7 (d,  $J = 27.0$  Hz), 105.5 (d,  $J = 22.5$  Hz), 77.2, 60.4, 37.7, 36.3, 30.8, 29.0, 28.8, 21.8, 21.4, 14.2;  $^{19}\text{F NMR}$  (471 MHz,  $\text{CDCl}_3$ )  $\delta$  -123.2; **HRMS** calcd. for  $\text{C}_{21}\text{H}_{26}\text{FN}_2\text{O}_3$   $[\text{M}+\text{H}]^+$ : 373.1922, found: 373.1921.

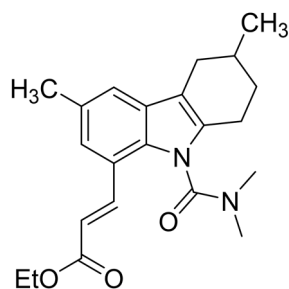

**ethyl (*E*)-3-(9-(dimethylcarbamoyl)-3,6-dimethyl-2,3,4,9-tetrahydro-1*H*-carbazol-8-yl)acrylate**

**bazol-8-yl) acrylate (3q)**

Yellow oil, 29 mg, 80% yield;  $^1\text{H NMR}$  (600 MHz,  $\text{CDCl}_3$ )  $\delta$  7.92 (d,  $J = 15.6$  Hz, 1H), 7.26 (s, 1H), 7.19 (s, 1H), 6.40 (dd,  $J = 15.6, 5.7$  Hz, 1H), 4.31-4.22 (m, 2H), 3.17 (s, 3H), 2.95-2.84 (m, 1H), 2.81-2.75 (m, 1H), 2.59 (s, 3H), 2.54-2.48 (m, 1H), 2.44 (s, 3H), 2.27-2.18 (m, 1H), 2.03-1.90 (m, 2H), 1.59 (s, 1H), 1.34 (t,  $J = 7.2$  Hz, 3H), 1.13 (d,  $J = 6.6$  Hz, 3H);  $^{13}\text{C NMR}$  (125 MHz,  $\text{CDCl}_3$ )  $\delta$  166.9, 155.2, 140.3, 135.3, 132.2, 131.9, 130.2, 129.7, 122.2, 120.5, 119.0, 112.3, 77.2, 60.5, 38.0, 36.6, 31.3, 29.4, 29.2, 22.2, 21.7, 21.3, 14.5; **HRMS** calcd. for  $\text{C}_{22}\text{H}_{29}\text{N}_2\text{O}_3$   $[\text{M}+\text{H}]^+$ : 369.2173, found: 369.2175.

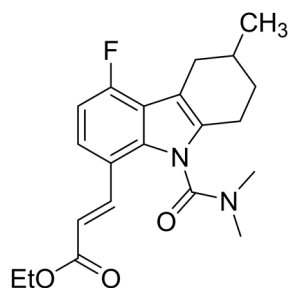

**ethyl (*E*)-3-(9-(dimethylcarbamoyl)-5-fluoro-3-methyl-2,3,4,9-tetrahydro-1*H*-carbazol-8-yl)acrylate (3r)**

Yellow oil, 25 mg, 68% yield;  $^1\text{H NMR}$  (600 MHz,  $\text{CDCl}_3$ )  $\delta$  7.72 (d,  $J = 16.0$  Hz, 1H), 7.33 (ddd,  $J = 8.3, 5.0, 3.2$  Hz, 1H), 6.93 (dd,  $J = 11.6, 8.5$  Hz, 1H), 6.57 (ddd,  $J = 16.0, 12.4, 1.3$  Hz, 1H), 4.38-4.19 (m, 2H), 3.17 (s, 3H), 2.89-2.81 (m, 1H), 2.80-2.74 (m, 1H), 2.66 (s, 3H), 2.58-2.48 (m, 1H), 2.29-2.15 (m, 1H), 2.02-1.87 (m, 2H), 1.64-1.49 (m, 1H), 1.34 (t,  $J = 7.1$  Hz, 3H), 1.12 (dd,  $J = 6.6, 2.6$  Hz, 3H);  $^{13}\text{C NMR}$  (150 MHz,  $\text{CDCl}_3$ )  $\delta$  166.9, 158.2 (d,  $J = 244.5$  Hz), 154.4, 135.1, 133.8, 133.4, 125.5, 123.4, 119.9, 112.5, 109.2 (d,  $J = 25.5$  Hz), 107.5 (d,  $J = 36.0$  Hz), 77.2, 60.5, 37.8, 36.4, 30.9, 29.2, 28.9, 21.8, 21.4, 14.3;  $^{19}\text{F NMR}$  (471 MHz,  $\text{CDCl}_3$ )  $\delta$  -119.6; **HRMS** calcd. for  $\text{C}_{21}\text{H}_{26}\text{FN}_2\text{O}_3$   $[\text{M}+\text{H}]^+$ : 373.1922, found: 373.1924.



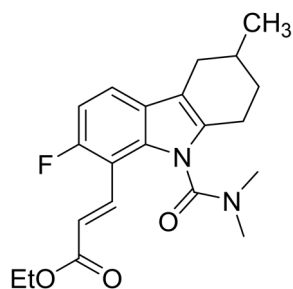

**ethyl(*E*)-3-(9-(dimethylcarbamoyl)-7-fluoro-3-methyl-2,3,4,9-tetrahydro-1*H*-carbazol-8-yl)acrylate (3s)**

Yellow oil, 20 mg, 54% yield;  $^1\text{H NMR}$  (600 MHz,  $\text{CDCl}_3$ )  $\delta$  7.87 (d,  $J = 15.4$  Hz, 1H), 7.27 (d,  $J = 5.2$  Hz, 1H), 6.77 (dd,  $J = 9.9, 8.3$  Hz, 1H), 6.33 (dd,  $J = 15.6, 6.3$  Hz, 1H), 4.36-4.16 (m, 2H), 3.19 (s, 3H), 3.02 (s, 1H), 2.94-2.82 (m, 1H), 2.60 (s, 3H), 2.56-2.48 (m, 1H), 2.49-2.34 (m, 1H), 2.07-1.85 (m, 2H), 1.62-1.46 (m, 1H), 1.34 (t,  $J = 7.1$  Hz, 3H), 1.12 (dd,  $J = 6.6, 2.3$  Hz, 3H);  $^{13}\text{C NMR}$  (150 MHz,  $\text{CDCl}_3$ )  $\delta$  166.6, 157.9 (d,  $J = 250.5$  Hz), 154.1, 139.0, 135.6 (d,  $J = 12.0$  Hz), 134.6, 121.7 (d,  $J = 9.0$  Hz), 118.6, 117.3 (d,  $J = 21.0$  Hz), 115.7, 110.7, 106.7 (d,  $J = 19.5$  Hz), 77.2, 60.4, 37.8, 36.5, 30.3, 29.3, 29.0, 21.8, 21.4, 14.3;  $^{19}\text{F NMR}$  (471 MHz,  $\text{CDCl}_3$ )  $\delta$  -121.2; **HRMS** calcd. for  $\text{C}_{21}\text{H}_{26}\text{FN}_2\text{O}_3$   $[\text{M}+\text{H}]^+$ : 373.1922, found: 373.1919.

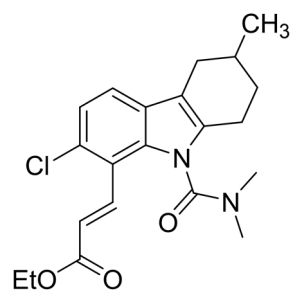

**ethyl (*E*)-3-(7-chloro-9-(dimethylcarbamoyl)-3-methyl-2,3,4,9-tetrahydro-1*H*-carbazol-8-yl)acrylate (3t)**

Yellow oil, 19 mg, 48% yield;  $^1\text{H NMR}$  (600 MHz,  $\text{CDCl}_3$ )  $\delta$  7.88 (dd,  $J = 15.6, 2.2$  Hz, 1H), 7.22 (d,  $J = 8.5$  Hz, 1H), 7.06 (d,  $J = 8.1$  Hz, 1H), 6.37 (dd,  $J = 15.5, 6.6$  Hz, 1H), 4.43-4.19 (m, 2H), 3.28 (ddt,  $J = 15.5, 10.1, 5.0$  Hz, 1H), 3.18 (d,  $J = 7.3$  Hz, 3H), 2.92-2.81 (m, 1H), 2.66-2.47 (m, 5H), 2.02-1.85 (m, 2H), 1.53 (dtd,  $J = 24.4, 12.3, 11.6, 5.5$  Hz, 1H), 1.34 (t,  $J = 7.1$  Hz, 3H), 1.14 (dd,  $J = 6.7, 2.5$  Hz, 3H);  $^{13}\text{C NMR}$  (125 MHz,  $\text{CDCl}_3$ )  $\delta$  166.5, 154.1, 139.0, 135.7, 134.2, 128.1, 126.1, 121.6,

121.2, 119.5, 118.0, 112.5, 77.2, 60.4, 37.7, 36.5, 31.1, 30.2, 29.4, 21.9, 21.4, 14.3;

**HRMS** calcd. for  $C_{21}H_{26}ClN_2O_3$   $[M+H]^+$ : 389.1626, found: 389.1625.

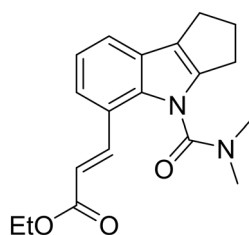

**ethyl (*E*)-3-(4-(dimethylcarbamoyl)-1,2,3,4-tetrahydrocyclopenta[*b*]indol-5-yl)acrylate (3u)**

Faint yellow oil, 29 mg, 90% yield;  $^1H$  NMR (500 MHz,  $CDCl_3$ )  $\delta$  7.94 (d,  $J = 15.7$  Hz, 1H), 7.44 (d,  $J = 7.8$  Hz, 1H), 7.35 (d,  $J = 7.5$  Hz, 1H), 7.15 (t,  $J = 7.7$  Hz, 1H), 6.40 (d,  $J = 15.7$  Hz, 1H), 4.27 (q,  $J = 7.2$  Hz, 2H), 3.23-3.07 (m, 3H), 3.03-2.92 (m, 2H), 2.85-2.79 (m, 3H), 2.75 (s, 2H), 2.55 (p,  $J = 7.1$  Hz, 2H), 1.34 (t,  $J = 7.1$  Hz, 3H);  $^{13}C$  NMR (125 MHz,  $CDCl_3$ )  $\delta$  166.6, 154.8, 145.2, 140.2, 138.2, 126.5, 121.8, 121.3, 120.8, 120.8, 120.5, 118.8, 77.2, 60.3, 28.0, 25.7, 24.3, 14.3; **HRMS** calcd. for  $C_{19}H_{23}N_2O_3$   $[M+H]^+$ : 327.1703, found: 327.1704.

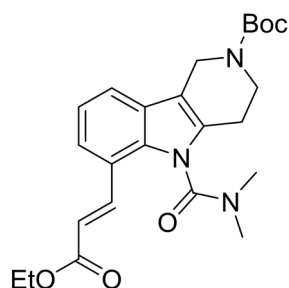

**tert-butyl (*E*)-5-(dimethylcarbamoyl)-6-(3-ethoxy-3-oxoprop-1-en-1-yl)-1,3,4,5-tetrahydro-2*H*-pyrido[4,3-*b*]indole-2-carboxylate (3v)**

Yellow oil, 29 mg, 67% yield;  $^1H$  NMR (600 MHz,  $CDCl_3$ )  $\delta$  7.93 (d,  $J = 15.6$  Hz, 1H), 7.47 (d,  $J = 7.7$  Hz, 1H), 7.40 (d,  $J = 7.5$  Hz, 1H), 7.17 (t,  $J = 7.7$  Hz, 1H), 6.42 (d,  $J = 15.5$  Hz, 1H), 4.78-4.61 (m, 1H), 4.60-4.48 (m, 1H), 4.27 (q,  $J = 7.1$  Hz, 2H), 3.95 (s, 1H), 3.67 (s, 1H), 3.19 (s, 3H), 3.02-2.88 (m, 1H), 2.71-2.57 (m, 4H), 1.50 (s, 9H), 1.34 (t,  $J = 7.2$  Hz, 3H);  $^{13}C$  NMR (150 MHz,  $CDCl_3$ )  $\delta$  166.5, 154.9, 154.1, 139.6, 133.3, 126.9, 121.5, 121.2, 120.1, 119.8, 119.6, 119.5, 80.1, 77.2, 60.5, 40.3,

37.9, 36.5, 29.6, 28.4, 14.3; **HRMS** calcd. for C<sub>24</sub>H<sub>31</sub>N<sub>3</sub>NaO<sub>5</sub> [M+Na]<sup>+</sup>: 464.2156, found: 464.2156.

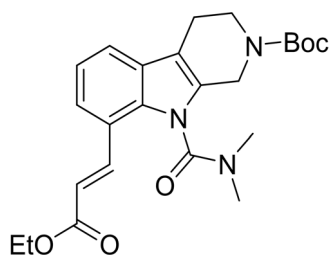

**tert-butyl (*E*)-9-(dimethylcarbamoyl)-8-(3-ethoxy-3-oxoprop-1-en-1-yl)-1,3,4,9-tetrahydro-2*H*-pyrido[3,4-*b*]indole-2-carboxylate (3w)**

Faint yellow oil, 31 mg, 70% yield; <sup>1</sup>H NMR (500 MHz, CDCl<sub>3</sub>) δ 7.93 (d, *J* = 15.6 Hz, 1H), 7.49 (d, *J* = 7.7 Hz, 1H), 7.40 (d, *J* = 7.5 Hz, 1H), 7.17 (t, *J* = 7.7 Hz, 1H), 6.42 (d, *J* = 15.6 Hz, 1H), 4.70 (s, 1H), 4.50 (s, 1H), 4.27 (q, *J* = 6.8 Hz, 2H), 4.19 – 4.00 (m, 1H), 3.95 – 3.55 (m, 1H), 3.17 (s, 3H), 2.77 (d, *J* = 7.0 Hz, 2H), 2.61 (s, 3H), 1.49 (s, 9H), 1.34 (t, *J* = 7.0 Hz, 3H); <sup>13</sup>C NMR (125 MHz, CDCl<sub>3</sub>) δ 166.7, 155.2, 154.1, 139.9, 133.5, 128.7, 122.0, 121.4, 120.5, 120.1, 119.7, 80.4, 77.2, 60.7, 41.2, 38.2, 36.7, 29.8, 28.6, 14.5; **HRMS** calcd. for C<sub>24</sub>H<sub>31</sub>N<sub>3</sub>NaO<sub>5</sub> [M+Na]<sup>+</sup>: 464.2156, found: 464.2158.

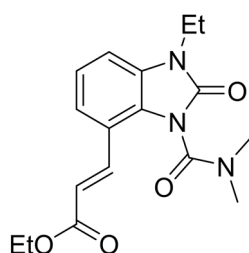

**ethyl (*E*)-3-(3-(dimethylcarbamoyl)-1-ethyl-2-oxo-2,3-dihydro-1*H*-benzo[*d*]imidazole-4-yl)acrylate (3x)**

Faint yellow oil, 29 mg, 88% yield; <sup>1</sup>H NMR (500 MHz, CDCl<sub>3</sub>) δ 7.72 (dd, *J* = 15.8, 2.5 Hz, 1H), 7.30-7.26 (m, 1H), 7.16 (td, *J* = 8.0, 2.4 Hz, 1H), 6.99 (dd, *J* = 7.9, 2.4 Hz, 1H), 6.33 (dd, *J* = 15.5, 2.5 Hz, 1H), 4.25 (q, *J* = 7.2 Hz, 2H), 3.91 (qt, *J* = 7.8, 3.9 Hz, 2H), 3.23 (s, 3H), 3.15 (s, 3H), 1.39-1.29 (m, 6H); <sup>13</sup>C NMR (125 MHz, CDCl<sub>3</sub>) δ 166.5, 151.8, 151.7, 138.6, 131.2, 126.2, 123.2, 120.5, 120.3, 119.4, 109.0,

77.2, 60.7, 38.5, 37.1, 36.3, 14.4, 13.4; **HRMS** calcd. for C<sub>17</sub>H<sub>22</sub>N<sub>3</sub>O<sub>4</sub> [M+H]<sup>+</sup>: 332.1605, found: 332.1602.

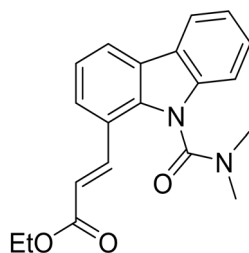

**ethyl (*E*)-3-(9-(dimethylcarbamoyl)-9*H*-carbazol-1-yl)acrylate (3y)**

Faint yellow solid, 30 mg, 90% yield, m.p. 146-147 °C; <sup>1</sup>H NMR (500 MHz, CDCl<sub>3</sub>) δ 8.14-7.89 (m, 3H), 7.63 (d, *J* = 7.6 Hz, 1H), 7.51-7.44 (m, 2H), 7.35-7.29 (m, 2H), 6.46 (d, *J* = 15.6 Hz, 1H), 4.30 (qd, *J* = 7.2, 2.1 Hz, 2H), 3.29 (s, 3H), 2.81 (s, 3H), 1.37 (t, *J* = 7.1 Hz, 3H); <sup>13</sup>C NMR (125 MHz, CDCl<sub>3</sub>) δ 166.7, 154.8, 140.0, 139.3, 137.2, 127.2, 125.6, 125.3, 123.7, 122.2, 121.7, 121.7, 120.5, 120.2, 119.7, 111.1, 77.2, 60.7, 38.2, 36.8, 14.5; **HRMS** calcd. for C<sub>20</sub>H<sub>21</sub>N<sub>2</sub>O<sub>3</sub> [M+H]<sup>+</sup>: 337.1547, found: 337.1549.

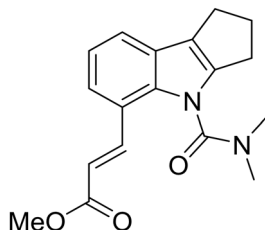

**methyl (*E*)-3-(4-(dimethylcarbamoyl)-1,2,3,4-tetrahydrocyclopenta[*b*]indol-5-yl)acrylate (3aa)**

Yellow solid, 28 mg, 89% yield, m.p. 101-102 °C; <sup>1</sup>H NMR (500 MHz, CDCl<sub>3</sub>) δ 7.96 (d, *J* = 15.6 Hz, 1H), 7.44 (d, *J* = 7.7 Hz, 1H), 7.34 (d, *J* = 7.5 Hz, 1H), 7.15 (t, *J* = 7.6 Hz, 1H), 6.40 (d, *J* = 15.7 Hz, 1H), 3.80 (s, 3H), 3.24-2.63 (m, 10H), 2.54 (p, *J* = 7.1 Hz, 2H); <sup>13</sup>C NMR (125 MHz, CDCl<sub>3</sub>) δ 167.3, 155.0, 145.4, 140.8, 138.4, 126.7, 122.0, 121.5, 121.1, 121.0, 120.6, 118.6, 77.2, 51.8, 38.2, 36.7, 28.2, 26.0, 24.5; **HRMS** calcd. for C<sub>18</sub>H<sub>21</sub>N<sub>2</sub>O<sub>3</sub> [M+H]<sup>+</sup>: 313.1547, found: 313.1547.

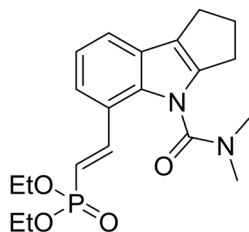

**diethyl(*E*)-(2-(4-(dimethylcarbamoyl)-1,2,3,4-tetrahydrocyclopenta[*b*]indol-5-yl)vinyl)phosphonate (3ab)**

Yellow oil, 21 mg, 54% yield;  $^1\text{H NMR}$  (500 MHz,  $\text{CDCl}_3$ )  $\delta$  7.69 (dd,  $J = 22.4, 17.2$  Hz, 1H), 7.43 (d,  $J = 7.7$  Hz, 1H), 7.30 (d,  $J = 7.5$  Hz, 1H), 7.15 (t,  $J = 7.7$  Hz, 1H), 6.21 (dd,  $J = 19.2, 17.1$  Hz, 1H), 4.15 (p,  $J = 7.2$  Hz, 4H), 3.25-2.66 (m, 10H), 2.54 (q,  $J = 7.1$  Hz, 2H), 1.36 (t,  $J = 7.1$  Hz, 6H);  $^{13}\text{C NMR}$  (150 MHz,  $\text{CDCl}_3$ )  $\delta$  154.8, 145.1, 144.4, 137.9, 126.5, 121.8, 121.3, 120.7, 120.6, 115.4, 114.2, 77.2, 61.9, 61.9, 38.2, 36.4, 27.9, 25.7, 24.3, 16.4, 16.3; **HRMS** calcd. for  $\text{C}_{20}\text{H}_{28}\text{N}_2\text{O}_4\text{P}$   $[\text{M}+\text{H}]^+$ : 391.1776, found: 391.1779.

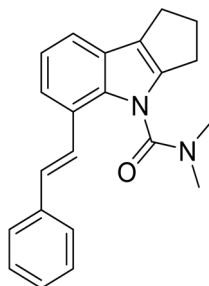

**(*E*)-*N,N*-dimethyl-5-styryl-2,3-dihydrocyclopenta[*b*]indole-4(1*H*)-carboxamide (3ac)**

Yellow oil, 19 mg, 57% yield;  $^1\text{H NMR}$  (500 MHz,  $\text{CDCl}_3$ )  $\delta$  7.52 (d,  $J = 7.6$  Hz, 2H), 7.41 (d,  $J = 16.0$  Hz, 1H), 7.36 (q,  $J = 8.0, 7.5$  Hz, 4H), 7.27 (d,  $J = 7.3$  Hz, 1H), 7.17 (t,  $J = 7.7$  Hz, 1H), 7.03 (d,  $J = 16.0$  Hz, 1H), 3.18-2.68 (m, 8H), 2.64-2.49 (m, 4H);  $^{13}\text{C NMR}$  (125 MHz,  $\text{CDCl}_3$ )  $\delta$  155.7, 145.0, 138.2, 137.7, 130.3, 129.1, 128.0, 126.8, 126.4, 124.7, 124.3, 122.0, 121.8, 120.6, 118.9, 77.2, 38.3, 37.1, 28.5, 26.2, 24.8; **HRMS** calcd. for  $\text{C}_{22}\text{H}_{23}\text{N}_2\text{O}$   $[\text{M}+\text{H}]^+$ : 331.1085, found: 331.1082.

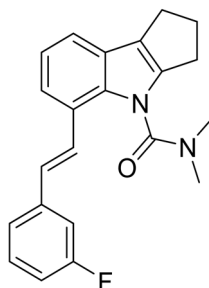

**(E)-5-(3-fluorostyryl)-N,N-dimethyl-2,3-dihydrocyclopenta[b]indole-4(1H)-carboxamide (3ad)**

Yellow oil, 18 mg, 51% yield;  $^1\text{H NMR}$  (500 MHz,  $\text{CDCl}_3$ )  $\delta$  7.41 (d,  $J = 15.9$  Hz, 1H), 7.37 (d,  $J = 7.9$  Hz, 1H), 7.32 (dd,  $J = 6.7, 3.8$  Hz, 2H), 7.29 (d,  $J = 9.9$  Hz, 1H), 7.21-7.18 (m, 1H), 7.16 (d,  $J = 7.6$  Hz, 1H), 7.01-6.93 (m, 2H), 3.01 (s, 4H), 2.84 (t,  $J = 7.1$  Hz, 3H), 2.62 (s, 2H), 2.55 (p,  $J = 7.3$  Hz, 3H);  $^{13}\text{C NMR}$  (125 MHz,  $\text{CDCl}_3$ )  $\delta$  163.4 (d,  $J = 243.8$  Hz), 155.4, 144.9, 139.9 (d,  $J = 7.5$  Hz), 138.0, 130.3 (d,  $J = 8.8$  Hz), 128.9, 126.3, 126.0, 123.6, 122.4, 121.9, 121.6, 120.5, 119.0, 114.5 (d,  $J = 21.2$  Hz), 113.0 (d,  $J = 21.2$  Hz), 28.2, 26.0, 24.6;  $^{19}\text{F NMR}$  (471 MHz,  $\text{CDCl}_3$ )  $\delta$  -113.3; **HRMS** calcd. for  $\text{C}_{22}\text{H}_{22}\text{FN}_2\text{O}$   $[\text{M}+\text{H}]^+$ : 349.1711, found: 349.1712.

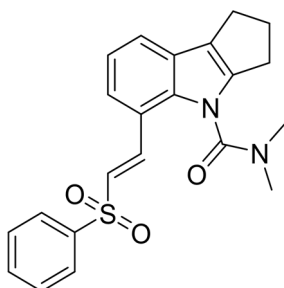

**(E)-N,N-dimethyl-5-(2-(phenylsulfonyl)vinyl)-2,3-dihydrocyclopenta[b]indole-4(1H)-carboxamide (3ae)**

Yellow solid, 18 mg, 47% yield, m.p. 102-104 °C;  $^1\text{H NMR}$  (600 MHz,  $\text{CDCl}_3$ )  $\delta$  8.05-7.93 (m, 3H), 7.64-7.58 (m, 1H), 7.55 (dd,  $J = 8.3, 6.8$  Hz, 2H), 7.46 (d,  $J = 7.7$  Hz, 1H), 7.25-7.21 (m, 1H), 7.12 (t,  $J = 7.7$  Hz, 1H), 6.81 (d,  $J = 15.0$  Hz, 1H), 3.25 (s, 3H), 2.87 (s, 4H), 2.85-2.78 (m, 3H), 2.62-2.48 (m, 2H);  $^{13}\text{C NMR}$  (150 MHz,  $\text{CDCl}_3$ )  $\delta$  154.7, 145.5, 140.5, 138.9, 138.4, 133.2, 129.2, 127.7, 127.3, 126.8, 122.0, 121.8, 121.3, 121.0, 118.2, 77.2, 38.2, 36.5, 28.0, 25.8, 24.2; **HRMS** calcd. for  $\text{C}_{22}\text{H}_{23}\text{N}_2\text{O}_3\text{S}$   $[\text{M}+\text{H}]^+$ : 395.1424, found: 395.1423.

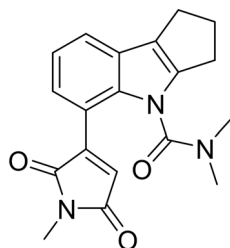

***N,N*-dimethyl-5-(1-methyl-2,5-dioxo-2,5-dihydro-1*H*-pyrrol-3-yl)-2,3-dihydrocyclopenta[*b*]indole-4(1*H*)-carboxamide (3af)**

Yellow solid, 14 mg, 43% yield, m.p. 128-130 °C; <sup>1</sup>H NMR (500 MHz, CDCl<sub>3</sub>) δ 7.51 (dd, *J* = 7.1, 1.8 Hz, 1H), 7.24-7.17 (m, 2H), 6.51 (s, 1H), 3.05 (s, 3H), 3.01 (s, 6H), 2.90 (t, *J* = 7.2 Hz, 2H), 2.83 (t, *J* = 7.0 Hz, 2H), 2.53 (p, *J* = 7.1 Hz, 2H); <sup>13</sup>C NMR (125 MHz, CDCl<sub>3</sub>) δ 171.0, 170.8, 155.6, 148.0, 144.9, 137.5, 127.4, 124.7, 123.6, 122.5, 121.5, 121.4, 115.3, 77.2, 28.0, 27.0, 24.1, 23.6; HRMS calcd. for C<sub>19</sub>H<sub>20</sub>N<sub>3</sub>O<sub>3</sub> [M+H]<sup>+</sup>: 338.1499, found: 338.1500.

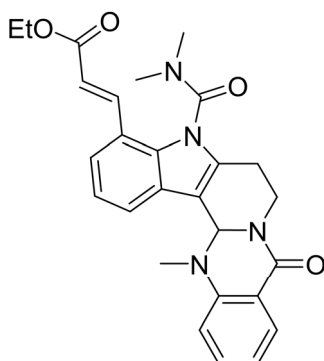

**ethyl (*E*)-3-(5-(dimethylcarbamoyl)-14-methyl-9-oxo-5,6,7,9,14,14a-hexahydroindolo[3',2':3,4]pyrido[2,1-*b*]quinazolin-4-yl)acrylate (4a)**

Yellow solid, 23 mg, 49% yield, m.p. 221-222 °C; <sup>1</sup>H NMR (500 MHz, CDCl<sub>3</sub>) δ 8.6 (d, *J* = 15.8 Hz, 1H), 7.6 (d, *J* = 7.8 Hz, 1H), 7.4 (t, *J* = 7.8 Hz, 1H), 7.4-7.3 (m, 2H), 7.3-7.3 (m, 1H), 7.3-7.2 (m, 1H), 7.1 (d, *J* = 8.1 Hz, 1H), 6.2 (d, *J* = 15.9 Hz, 1H), 6.1 (s, 1H), 4.9 (ddd, *J* = 12.9, 5.4, 2.1 Hz, 1H), 4.5-4.2 (m, 2H), 3.3 (ddd, *J* = 12.9, 11.2, 4.3 Hz, 1H), 3.1 (s, 3H), 3.1 (d, *J* = 2.7 Hz, 3H), 3.0-3.0 (m, 1H), 2.9 (tdd, *J* = 10.5, 5.6, 1.8 Hz, 1H), 2.5 (s, 3H), 1.3 (t, *J* = 7.1 Hz, 3H); <sup>13</sup>C NMR (125 MHz, CDCl<sub>3</sub>) δ 167.0, 163.9, 153.7, 152.0, 145.6, 138.4, 136.4, 132.4, 126.7, 124.6, 124.5, 124.0,

122.4, 121.8, 120.1, 119.6, 118.3, 118.1, 111.9, 77.2, 67.2, 60.6, 39.0, 37.3, 37.0, 29.5, 20.4, 14.5; **HRMS** calcd. for C<sub>27</sub>H<sub>29</sub>N<sub>4</sub>O<sub>4</sub> [M+H]<sup>+</sup>: 473.2183, found: 473.2184.

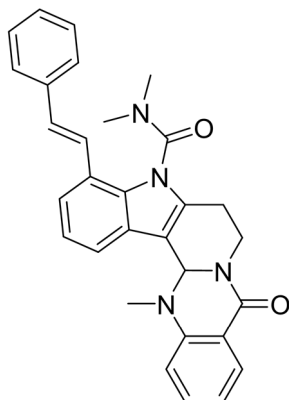

**(E)-N,N,14-trimethyl-9-oxo-4-styryl-6,9,14,14a-tetrahydroindolo[3',2':3,4]pyrido[2,1-b]quinazoline-5(7H)-carboxamide (4b)**

Faint yellow solid, 20 mg, 43% yield, m.p. 216-217 °C **<sup>1</sup>H NMR** (600 MHz, CDCl<sub>3</sub>) δ 8.2 (d, *J* = 16.2 Hz, 1H), 7.7-7.5 (m, 3H), 7.5 (d, *J* = 7.6 Hz, 1H), 7.4 (t, *J* = 7.8 Hz, 1H), 7.3 (t, *J* = 6.9 Hz, 4H), 7.2 (d, *J* = 7.8, 3.5 Hz, 2H), 7.1-7.0 (m, 2H), 6.1 (s, 1H), 4.9 (ddd, *J* = 12.9, 5.5, 2.1 Hz, 1H), 3.4 (ddd, *J* = 12.8, 11.1, 4.3 Hz, 1H), 3.2 (s, 3H), 3.1 (s, 3H), 3.1-3.0 (m, 1H), 3.0-2.9 (m, 1H), 2.4 (s, 3H); **<sup>13</sup>C NMR** (150 MHz, CDCl<sub>3</sub>) δ 164.4, 153.5, 152.0, 140.9, 137.7, 136.2, 132.0, 130.2, 129.9, 129.2, 129.1, 128.5, 127.4, 126.9, 126.5, 124.3, 123.0, 122.1, 121.5, 119.4, 117.7, 111.7, 66.8, 38.5, 37.1, 36.7, 29.3, 20.3; **HRMS** calcd. for C<sub>30</sub>H<sub>29</sub>N<sub>4</sub>O<sub>2</sub> [M+H]<sup>+</sup>: 477.2285, found: 477.2285.

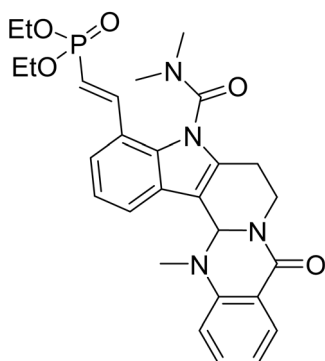

**diethyl (E)-(2-(5-(dimethylcarbamoyl)-14-methyl-9-oxo-5,6,7,9,14,14a-hexahydroindolo[3',2':3,4]pyrido[2,1-b]quinazolin-4-yl)vinyl)phosphonate (4c)**

Faint yellow solid, 25 mg, 47% yield, m.p. 226-227 °C; **<sup>1</sup>H NMR** (600 MHz, CDCl<sub>3</sub>)



$\delta$  8.3 (dd,  $J = 22.2, 17.5$  Hz, 1H), 7.6 (d,  $J = 7.8$  Hz, 1H), 7.4 (t,  $J = 7.8$  Hz, 1H), 7.4-7.3 (m, 2H), 7.3 (d,  $J = 7.6$  Hz, 1H), 7.2 (d,  $J = 7.9$  Hz, 1H), 7.1-7.1 (m, 1H), 6.2-6.1 (m, 1H), 6.1 (s, 1H), 4.9 (ddd,  $J = 12.9, 5.4, 1.9$  Hz, 1H), 4.2 (qd,  $J = 7.3, 3.0$  Hz, 4H), 3.3 (ddd,  $J = 12.9, 11.3, 4.3$  Hz, 1H), 3.1 (s, 3H), 3.1 (s, 3H), 3.0 (ddd,  $J = 14.0, 4.2, 2.1$  Hz, 1H), 2.9 (dddd,  $J = 16.0, 11.4, 5.5, 1.7$  Hz, 1H), 2.4 (s, 3H), 1.4 (td,  $J = 7.1, 5.0$  Hz, 6H);  $^{13}\text{C}$  NMR (150 MHz,  $\text{CDCl}_3$ )  $\delta$  163.5, 153.4, 151.7, 149.1, 138.6, 138.5, 136.1, 132.1, 126.4, 124.4, 124.0, 123.6, 121.6, 119.4, 117.8, 115.9, 114.6, 111.7, 77.2, 66.9, 62.0, 61.9, 38.7, 37.0, 36.7, 29.2, 20.2, 16.4, 16.3; HRMS calcd. for  $\text{C}_{28}\text{H}_{33}\text{N}_4\text{NaO}_5\text{P}$   $[\text{M}+\text{Na}]^+$ : 559.2081, found: 559.2075.

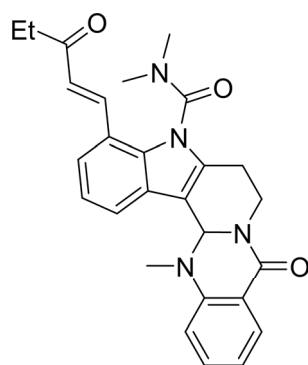

**(E)-N,N,14-trimethyl-9-oxo-4-(3-oxopent-1-en-1-yl)-6,9,14,14a-tetrahydroindolo[3',2':3,4]pyrido[2,1-b]quinazoline-5(7H)-carboxamide (4d)**

Yellow solid, 17 mg, 37% yield, m.p. 223-224 °C;  $^1\text{H}$  NMR (500 MHz,  $\text{CDCl}_3$ )  $\delta$  8.57 (d,  $J = 16.4$  Hz, 1H), 7.60 (d,  $J = 7.8$  Hz, 1H), 7.43 (t,  $J = 7.8$  Hz, 1H), 7.38-7.30 (m, 3H), 7.27-7.23 (m, 1H), 7.14 (dd,  $J = 8.0, 1.1$  Hz, 1H), 6.49 (d,  $J = 16.4$  Hz, 1H), 6.11 (s, 1H), 4.86 (ddd,  $J = 12.9, 5.4, 2.0$  Hz, 1H), 3.35 (ddd,  $J = 12.9, 11.2, 4.3$  Hz, 1H), 3.16 (s, 3H), 3.11 (s, 3H), 3.03 (ddt,  $J = 15.8, 4.1, 1.8$  Hz, 1H), 2.96-2.90 (m, 1H), 2.90-2.85 (m, 1H), 2.85-2.78 (m, 1H), 2.47 (s, 3H), 1.19 (t,  $J = 7.3$  Hz, 3H);  $^{13}\text{C}$  NMR (125 MHz,  $\text{CDCl}_3$ )  $\delta$  202.5, 164.4, 153.9, 152.3, 144.1, 138.7, 136.6, 132.7, 130.3, 129.1, 126.9, 124.9, 124.5, 124.1, 122.5, 122.1, 119.9, 118.3, 112.2, 77.2, 67.4, 39.2, 37.5, 37.2, 32.7, 29.7, 20.7, 8.7; HRMS calcd. for  $\text{C}_{27}\text{H}_{29}\text{N}_4\text{O}_3$   $[\text{M}+\text{H}]^+$ : 457.2234, found: 457.2236.

## 2.4 The general procedure for rhodium-catalyzed deuteration

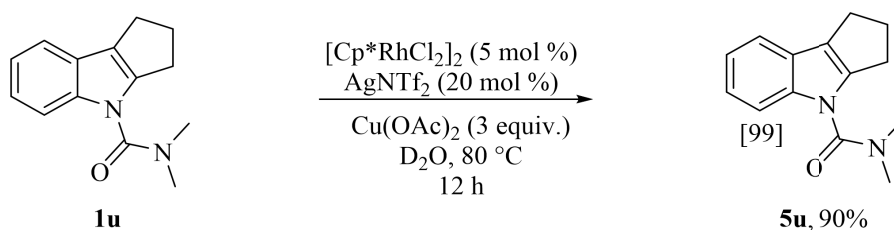

An oven-dried screw cap reaction tube was charged with a magnetic stir-bar, substrate (0.1 mmol, 1.0 equiv.),  $[\text{Cp}^*\text{RhCl}_2]_2$  (0.005 mmol, 5 mol%),  $\text{Cu}(\text{OAc})_2$  (0.3 mmol, 3.0 equiv.), and  $\text{AgNTf}_2$  (0.02 mmol, 20 mol%) were taken. Subsequently,  $\text{D}_2\text{O}$  (0.5 mL) was added and the reaction mixture was stirred vigorously at  $80\text{ }^\circ\text{C}$  for 12 h. The reaction mixture was then diluted with EtOAc and filtered through celite pad. After evaporation of the solvent, the crude mixture was purified by preparative Thin-Layer Chromatography (petroleum ether/ethyl acetate = 3:1).

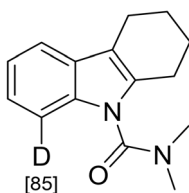

### *N,N*-dimethyl-1,2,3,4-tetrahydro-9*H*-carbazole-9-carboxamide-8-*d* (**5a**)

Faint yellow solid, 21 mg, 88% yield;  $^1\text{H NMR}$  (500 MHz,  $\text{CDCl}_3$ )  $\delta$  7.44 (d,  $J = 7.6$  Hz, 1H), 7.23 (d,  $J = 8.1$  Hz, 0.15H), 7.19 (d,  $J = 7.1$  Hz, 1H), 7.14 (t,  $J = 7.4$  Hz, 1H), 3.05 (s, 6H), 2.80 (t,  $J = 5.5$  Hz, 2H), 2.73-2.63 (m, 2H), 1.96-1.83 (m, 4H);  $^{13}\text{C NMR}$  (150 MHz,  $\text{CDCl}_3$ )  $\delta$  154.5, 135.2, 134.9, 128.5, 122.1, 120.6, 117.9, 113.7, 111.2, 77.2, 37.8, 23.0, 22.9, 22.6, 20.8; **HRMS** calcd. for  $\text{C}_{15}\text{H}_{18}\text{DN}_2\text{O}$   $[\text{M}+\text{H}]^+$ : 244.1555, found: 244.1551.

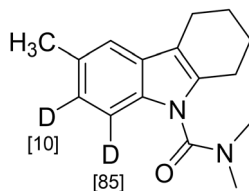

### *N,N,6*-trimethyl-1,2,3,4-tetrahydro-9*H*-carbazole-9-carboxamide-7,8-*d*<sub>2</sub> (**5b**)

Yellow oil, 21 mg, 83% yield;  $^1\text{H NMR}$  (500 MHz,  $\text{CDCl}_3$ )  $\delta$  7.22 (d,  $J = 1.5$  Hz, 1H), 7.11 (d,  $J = 8.4$  Hz, 0.15H), 7.00 (d,  $J = 1.6$  Hz, 0.90H), 3.04 (s, 6H), 2.78 (s, 2H),

2.65 (td,  $J = 5.9, 2.0$  Hz, 2H), 2.44 (s, 3H), 1.96-1.80 (m, 4H);  $^{13}\text{C}$  NMR (150 MHz, DMSO- $d_6$ )  $\delta$  153.5, 135.1, 132.9, 129.2, 128.0, 123.4, 117.8, 112.3, 111.0, 39.5, 37.3, 22.6, 22.4, 22.4, 21.0, 20.4; HRMS calcd. for  $\text{C}_{16}\text{H}_{20}\text{DN}_2\text{O}$   $[\text{M}+\text{H}]^+$ : 258.1711, found: 258.1712.

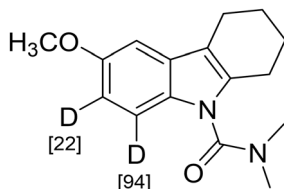

**6-methoxy-*N,N*-dimethyl-1,2,3,4-tetrahydro-9*H*-carbazole-9-carboxamide-7,8- $d_2$**   
**(5d)**

Yellow oil, 22 mg, 80% yield;  $^1\text{H}$  NMR (600 MHz,  $\text{CDCl}_3$ )  $\delta$  7.12 (d,  $J = 8.8$  Hz, 0.06H), 6.89 (d,  $J = 2.5$  Hz, 1H), 6.81 (d,  $J = 2.5$  Hz, 0.78H), 3.85 (s, 3H), 3.03 (s, 6H), 2.79 (s, 2H), 2.70-2.58 (m, 2H), 1.95-1.77 (m, 4H);  $^{13}\text{C}$  NMR (150 MHz,  $\text{CDCl}_3$ )  $\delta$  154.8, 154.7, 136.2, 129.8, 129.3, 113.7, 110.9, 100.7, 100.7, 77.2, 55.7, 37.9, 23.1, 23.0, 22.7, 20.9; HRMS calcd. for  $\text{C}_{16}\text{H}_{19}\text{DN}_2\text{O}_2$   $[\text{M}+\text{H}]^+$ : 274.1660, found: 274.1655.

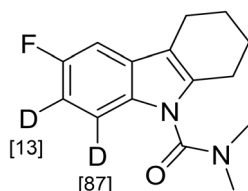

**6-fluoro-*N,N*-dimethyl-1,2,3,4-tetrahydro-9*H*-carbazole-9-carboxamide-7,8- $d_2$**   
**(5e)**

Faint yellow oil, 22 mg, 85% yield;  $^1\text{H}$  NMR (500 MHz,  $\text{CDCl}_3$ )  $\delta$  7.14 (dd,  $J = 8.9, 4.3$  Hz, 0.13 H), 7.07 (dd,  $J = 9.1, 2.3$  Hz, 1H), 6.90 (dd,  $J = 9.2, 2.6$  Hz, 0.87 H), 3.03 (s, 6H), 2.78 (s, 2H), 2.67-2.57 (m, 2H), 1.94-1.80 (m, 4H);  $^{13}\text{C}$  NMR (125 MHz,  $\text{CDCl}_3$ )  $\delta$  158.4 (d,  $J = 235.0$  Hz), 154.3, 137.1, 131.3, 129.3 (d,  $J = 10.0$  Hz), 113.8, 111.8 (d,  $J = 8.8$  Hz), 109.6 (d,  $J = 26.2$  Hz), 103.4 (d,  $J = 23.8$  Hz), 77.2, 37.8, 23.0, 22.9, 22.5, 20.7; HRMS calcd. for  $\text{C}_{15}\text{H}_{17}\text{DFN}_2\text{O}$   $[\text{M}+\text{H}]^+$ : 262.1460, found: 262.1459.

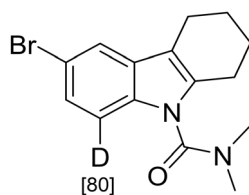

**6-bromo-*N,N*-dimethyl-1,2,3,4-tetrahydro-9*H*-carbazole-9-carboxamide-8-*d* (5g)**

Faint yellow oil, 24 mg, 76% yield;  $^1\text{H NMR}$  (600 MHz,  $\text{CDCl}_3$ )  $\delta$  7.55 (d,  $J = 2.0$  Hz, 1H), 7.25 (d,  $J = 1.9$  Hz, 1H), 7.09 (d,  $J = 8.6$  Hz, 0.20H), 3.02 (s, 6H), 2.78 (s, 2H), 2.69-2.58 (m, 2H), 1.94-1.77 (m, 4H);  $^{13}\text{C NMR}$  (150 MHz,  $\text{CDCl}_3$ )  $\delta$  154.1, 136.7, 133.5, 130.3, 124.8, 120.8, 113.9, 113.3, 112.6, 77.2, 37.8, 22.9, 22.8, 22.5, 20.6; **HRMS** calcd. for  $\text{C}_{15}\text{H}_{17}\text{DBrN}_2\text{O}$   $[\text{M}+\text{H}]^+$ : 322.0660, found: 322.0652.

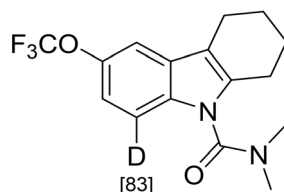

***N,N*-dimethyl-6-(trifluoromethoxy)-1,2,3,4-tetrahydro-9*H*-carbazole-9-carboxamide-8-*d* (5h)**

Faint yellow oil, 26 mg, 79% yield;  $^1\text{H NMR}$  (500 MHz,  $\text{DMSO-}d_6$ )  $\delta$  7.41 (d,  $J = 2.3$  Hz, 1H), 7.38–7.34 (m, 0.17H), 7.12 (d,  $J = 2.3$  Hz, 1H), 2.96 (s, 6H), 2.70 (d,  $J = 6.0$  Hz, 2H), 2.63 (t,  $J = 5.9$  Hz, 2H), 1.87–1.75 (m, 4H);  $^{13}\text{C NMR}$  (125 MHz,  $\text{DMSO-}d_6$ )  $\delta$  153.3, 143.2, 137.9, 133.4, 130.1, 128.8, 119.8, 115.7, 113.3, 110.9, 39.5, 37.8, 22.9, 22.8, 22.7, 20.7; **HRMS** calcd. for  $\text{C}_{16}\text{H}_{17}\text{DF}_3\text{N}_2\text{O}_2$   $[\text{M}+\text{H}]^+$ : 328.1378, found: 328.1377.

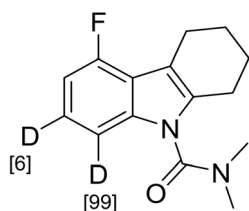

**5-fluoro-*N,N*-dimethyl-1,2,3,4-tetrahydro-9*H*-carbazole-9-carboxamide-7,8-*d*<sub>2</sub> (5i)**

Yellow oil, 21 mg, 82% yield;  $^1\text{H NMR}$  (500 MHz,  $\text{CDCl}_3$ )  $\delta$  7.32 (dd,  $J = 8.6, 5.4$

Hz, 1H), 6.89 (t,  $J = 9.0$  Hz, 0.94H), 3.04 (s, 6H), 2.76 (s, 2H), 2.69-2.60 (m, 2H), 1.94-1.79 (m, 4H);  $^{13}\text{C}$  NMR (125 MHz,  $\text{CDCl}_3$ )  $\delta$  159.9 (d,  $J = 236.2$  Hz), 154.2, 135.5, 134.9 (d,  $J = 11.2$  Hz) 125.0, 118.4 (d,  $J = 11.0$  Hz), 113.6, 108.8 (d,  $J = 23.8$  Hz), 98.2 (q,  $J = 25.6$  Hz), 77.2, 37.8, 22.9, 22.9, 22.5, 20.7; HRMS calcd. for  $\text{C}_{15}\text{H}_{17}\text{DFN}_2\text{O}$   $[\text{M}+\text{H}]^+$ : 262.1460, found: 262.1457.

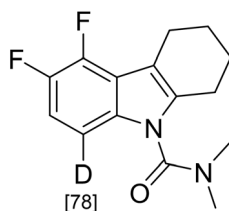

**5,6-difluoro-*N,N*-dimethyl-1,2,3,4-tetrahydro-9*H*-carbazole-9-carboxamide-8-*d***

**(5m)**

Faint yellow solid, 22 mg, 78% yield;  $^1\text{H}$  NMR (500 MHz,  $\text{CDCl}_3$ )  $\delta$  6.94 (dd,  $J = 10.8, 7.4$  Hz, 1H), 6.88 (dd,  $J = 8.9, 3.4$  Hz, 0.22H), 3.02 (s, 6H), 2.89-2.81 (m, 2H), 2.74 (s, 2H), 1.94-1.77 (m, 4H);  $^{13}\text{C}$  NMR (125 MHz,  $\text{CDCl}_3$ )  $\delta$  153.8, 145.0 (dd,  $J = 231.2, 7.5$  Hz), 143.3 (dd,  $J = 245.0, 12.5$  Hz), 136.6, 132.5 (d,  $J = 8.8$  Hz), 118.3 (d,  $J = 17.5$  Hz), 112.1, 110.9 (d,  $J = 21.2$  Hz), 106.4 (q,  $J = 3.8$  Hz), 77.2, 37.7, 22.9, 22.6, 22.4, 22.0; HRMS calcd. for  $\text{C}_{15}\text{H}_{16}\text{DF}_2\text{N}_2\text{O}$   $[\text{M}+\text{H}]^+$ : 280.1366, found: 280.1360.

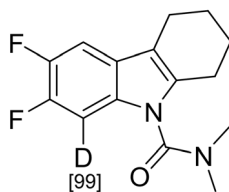

**6,7-difluoro-*N,N*-dimethyl-1,2,3,4-tetrahydro-9*H*-carbazole-9-carboxamide-8-*d***

**(5n)**

Faint yellow solid, 23 mg, 81% yield;  $^1\text{H}$  NMR (500 MHz,  $\text{CDCl}_3$ )  $\delta$  7.19 (dd,  $J = 10.4, 7.7$  Hz, 1H), 3.08 (s, 6H), 2.80 (s, 2H), 2.68-2.59 (m, 2H), 1.97-1.87 (m, 4H);  $^{13}\text{C}$  NMR (125 MHz,  $\text{CDCl}_3$ )  $\delta$  154.0, 147.6 (dd,  $J = 238.8, 15.0$  Hz), 146.7 (dd,  $J = 238.1, 15.0$  Hz), 136.7, 129.9 (d,  $J = 10.0$  Hz), 123.9 (d,  $J = 6.2$  Hz), 113.6, 104.9 (d,  $J = 18.8$  Hz), 99.8 (d,  $J = 9.5$  Hz), 77.2, 37.8, 23.0, 22.7, 22.4, 20.7; HRMS calcd. for

C<sub>15</sub>H<sub>16</sub>DF<sub>2</sub>N<sub>2</sub>O [M+H]<sup>+</sup>: 280.1366, found: 280.1362.

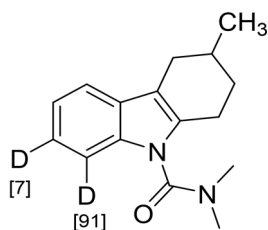

***N,N,3-trimethyl-1,2,3,4-tetrahydro-9H-carbazole-9-carboxamide-7,8-d<sub>2</sub>* (5o)**

Yellow oil, 23 mg, 91% yield; <sup>1</sup>H NMR (500 MHz, CDCl<sub>3</sub>) δ 7.43 (dd, *J* = 7.7, 1.4 Hz, 1H), 7.23 (dd, *J* = 8.1, 1.5 Hz, 0.09H), 7.19 (d, *J* = 7.6 Hz, 1H), 7.14 (t, *J* = 7.4 Hz, 1H), 3.06 (s, 3H), 3.03 (s, 3H), 2.84 (d, *J* = 5.6 Hz, 2H), 2.81 (d, *J* = 5.3 Hz, 1H), 2.33-2.20 (m, 1H), 2.02-1.90 (m, 2H), 1.65-1.48 (m, 1H), 1.14 (d, *J* = 6.5 Hz, 3H); <sup>13</sup>C NMR (125 MHz, CDCl<sub>3</sub>) δ 155.1, 135.6, 135.5, 128.9, 122.5, 121.1, 118.4, 114.2, 111.8, 77.2, 38.5, 38.2, 31.7, 29.7, 29.5, 23.1, 22.0; HRMS calcd. for C<sub>16</sub>H<sub>20</sub>DN<sub>2</sub>O [M+H]<sup>+</sup>: 258.1711, found: 258.1703.

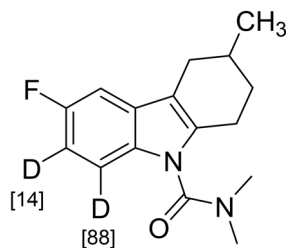

***6-fluoro-N,N,3-trimethyl-1,2,3,4-tetrahydro-9H-carbazole-9-carboxamide-7,8-d<sub>2</sub>* (5p)**

Yellow solid, 22 mg, 81% yield; <sup>1</sup>H NMR (500 MHz, CDCl<sub>3</sub>) δ 7.18-7.13 (m, 0.12H), 7.06 (dd, *J* = 9.1, 2.5 Hz, 1H), 6.90 (dd, *J* = 9.3, 2.6 Hz, 1H), 3.04 (s, 3H), 3.02 (s, 3H), 2.81 (s, 2H), 2.79-2.71 (m, 1H), 2.26-2.16 (m, 1H), 2.00-1.91 (m, 2H), 1.58-1.48 (m, 1H), 1.13 (d, *J* = 6.5 Hz, 3H); <sup>13</sup>C NMR (125 MHz, CDCl<sub>3</sub>) δ 158.4 (d, *J* = 235.0 Hz), 154.4, 136.9, 131.5, 129.2, 129.1, 113.7, 109.6 (d, *J* = 25.0 Hz), 103.4 (d, *J* = 23.8 Hz), 77.2, 38.0, 37.7, 31.1, 29.1, 29.0, 22.7, 21.5; HRMS calcd. for C<sub>16</sub>H<sub>19</sub>DFN<sub>2</sub>O [M+H]<sup>+</sup>: 276.1617, found: 276.1611.

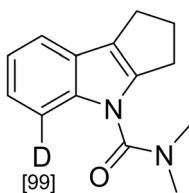

***N,N*-dimethyl-2,3-dihydrocyclopenta[*b*]indole-4(1*H*)-carboxamide-5-*d* (5u)**

Yellow solid, 20 mg, 90% yield;  $^1\text{H NMR}$  (600 MHz,  $\text{CDCl}_3$ )  $\delta$  7.41 (dd,  $J = 7.5, 1.5$  Hz, 1H), 7.20-7.12 (m, 2H), 3.06 (s, 6H), 3.00-2.94 (m, 2H), 2.83-2.76 (m, 2H), 2.53 (p,  $J = 7.2$  Hz, 2H);  $^{13}\text{C NMR}$  (125 MHz,  $\text{CDCl}_3$ )  $\delta$  155.0, 144.8, 139.9, 125.8, 123.0, 121.7, 121.2, 118.8, 113.0, 77.2, 38.2, 27.9, 26.6, 24.1; **HRMS** calcd. for  $\text{C}_{14}\text{H}_{16}\text{DN}_2\text{O}$   $[\text{M}+\text{H}]^+$ : 230.1398, found: 230.1398.

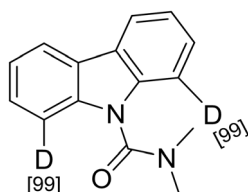

***N,N*-dimethyl-9*H*-carbazole-9-carboxamide-1,8-*d*<sub>2</sub> (5y)**

Yellow oil, 22 mg, 94% yield;  $^1\text{H NMR}$  (500 MHz,  $\text{CDCl}_3$ )  $\delta$  8.05 (dd,  $J = 7.8, 1.2$  Hz, 2H), 7.47 (dd,  $J = 7.2, 1.2$  Hz, 2H), 7.31 (t,  $J = 7.5$  Hz, 2H), 3.12 (s, 6H);  $^{13}\text{C NMR}$  (125 MHz,  $\text{CDCl}_3$ )  $\delta$  154.8, 138.5, 126.3, 124.3, 121.4, 120.1, 112.3, 77.2, 38.0; **HRMS** calcd. for  $\text{C}_{15}\text{H}_{13}\text{D}_2\text{N}_2\text{O}$   $[\text{M}+\text{H}]^+$ : 241.1304, found: 241.1301.

## 2.5 The utility of this method - removal of template

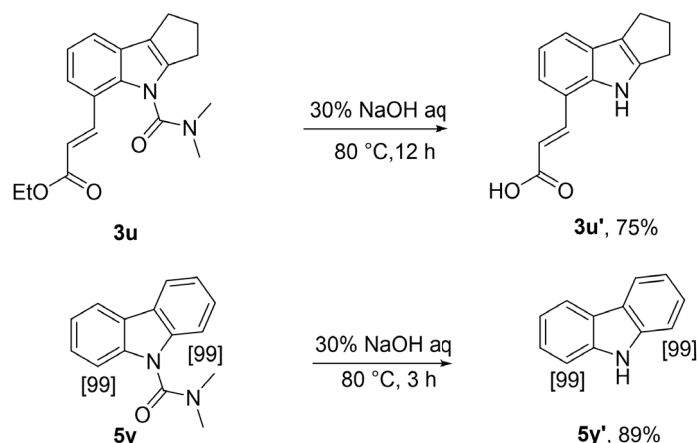

A sealable tube with a magnetic stir bar was charged with **3u** and **5y** (0.25 mmol), EtOH (2.8 mL) and 30% sodium hydroxide solution (0.9 mL). The tube was then capped and the mixture was stirred at 80 °C. The mixture was then stirred at 80 °C for 3-12 h, then the solution was cooled to ambient temperature, concentration, acidified to pH = 5-6 using 1N HCl, and extracted with ethyl acetate for 3 times. The combined organic phases were dried over anhydrous MgSO<sub>4</sub>. The solvent was concentrated and the residue was purified by preparative Thin-Layer Chromatography (petroleum ether/ethyl acetate = 2:1) to provide the desired products.

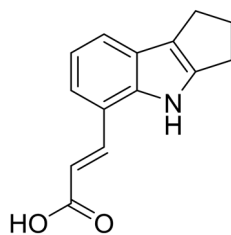

### (*E*)-3-(1,2,3,4-tetrahydrocyclopenta[*b*]indol-5-yl)acrylic acid (**3u'**)

Yellow solid, 43 mg, 75% yield, m.p. 150-151 °C; <sup>1</sup>H NMR (500 MHz, CDCl<sub>3</sub>) δ 8.50 (s, 1H), 8.09 (d, *J* = 15.9 Hz, 1H), 7.49 (d, *J* = 7.8 Hz, 1H), 7.33 (d, *J* = 7.6 Hz, 1H), 7.11 (t, *J* = 7.7 Hz, 1H), 6.49 (d, *J* = 16.0 Hz, 1H), 2.90 (t, *J* = 7.2 Hz, 2H), 2.86-2.79 (m, 2H), 2.55 (p, *J* = 7.2 Hz, 2H); <sup>13</sup>C NMR (125 MHz, CDCl<sub>3</sub>) δ 172.0, 144.6, 143.6, 139.5, 125.7, 121.5, 121.0, 120.4, 119.6, 117.8, 116.3, 77.2, 28.6, 25.8,



24.3; **HRMS** calcd. for  $C_{14}H_{12}NO_2$   $[M-H]^-$ : 226.0874, found: 226.0876.

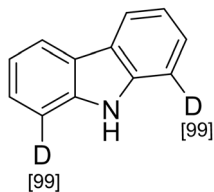

**9H-carbazole-1,8-d2 (5y')**

White solid, 38 mg, 89% yield;  $^1H$  NMR (500 MHz,  $CDCl_3$ )  $\delta$  8.15-8.07 (m, 2H), 8.05 (s, 1H), 7.43 (d,  $J = 7.2$  Hz, 2H), 7.25 (s, 2H);  $^{13}C$  NMR (125 MHz,  $CDCl_3$ )  $\delta$  139.3, 125.6, 123.2, 120.2, 119.3, 110.4, 77.2; **HRMS** calcd. for  $C_{12}H_6D_2N$   $[M-H]^-$ : 168.0788, found: 168.0787.

## 2.6. Mechanistic Studies

### 2.6.1 H/D exchange experiment

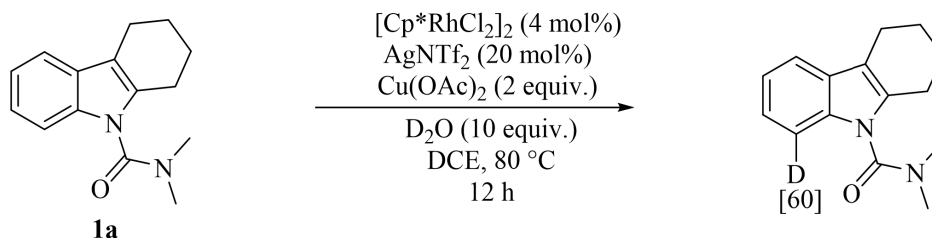

An oven-dried screw cap reaction tube was charged with a magnetic stir-bar, substrate (0.1 mmol, 1.0 equiv.), D<sub>2</sub>O (0.3 mL), [Cp\*RhCl<sub>2</sub>]<sub>2</sub> (0.004 mmol, 4 mol%), Cu(OAc)<sub>2</sub> (0.2 mmol, 2.0 equiv.), AgNTf<sub>2</sub> (0.02 mmol, 20 mol%) and DCE (0.7 mL) were taken. The reaction mixture was stirred vigorously at 80 °C for 12 h. The reaction mixture was then diluted with EtOAc and filtered through celite pad. After evaporation of the solvent, the crude mixture was purified by preparative Thin-Layer Chromatography (petroleum ether/ethyl acetate = 3:1).

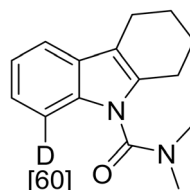

Faint yellow oil, 21 mg, 87% yield; <sup>1</sup>H NMR (600 MHz, CDCl<sub>3</sub>) δ 7.45 (dd, *J* = 7.7, 1.3 Hz, 1H), 7.23 (d, *J* = 8.1 Hz, 0.40H), 7.21-7.17 (m, 1H), 7.14 (t, *J* = 7.4 Hz, 1H), 3.05 (s, 6H), 2.80 (s, 2H), 2.69 (tt, *J* = 5.7, 1.9 Hz, 2H), 1.96-1.82 (m, 4H).

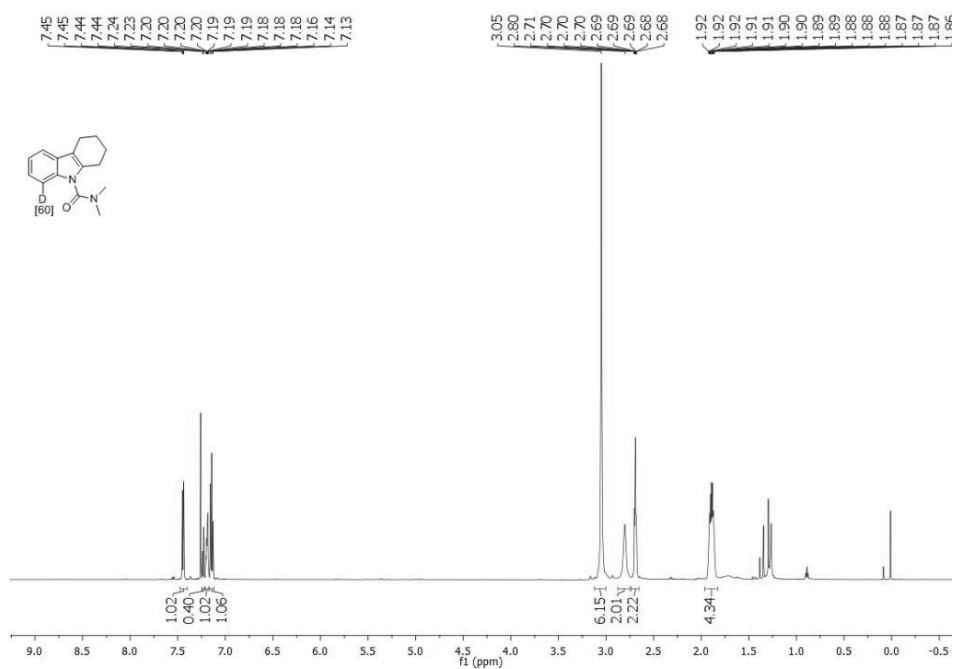

## 2.6.2 Intermolecular competitive experiments

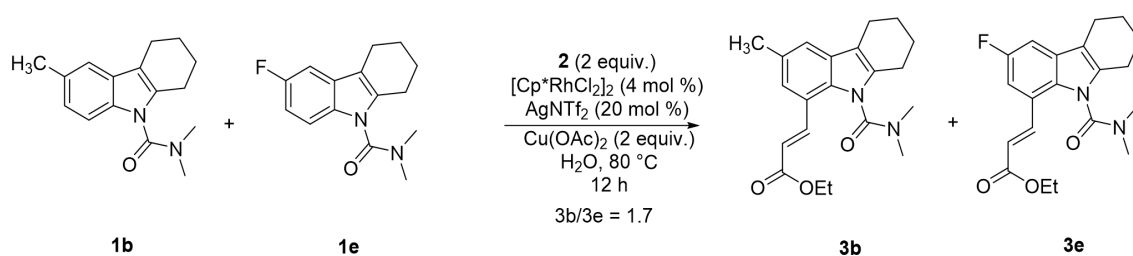

The mixture of **1b** (0.1 mmol, 1 equiv.) & **1e** (0.1 mmol, 1 equiv.), ethyl acrylate (**2**, 0.2 mmol, 2 equiv.), [Cp\*RhCl<sub>2</sub>]<sub>2</sub> (0.004 mmol, 4 mol%), AgNTf<sub>2</sub> (0.2 mmol, 20 mol%), Cu(OAc)<sub>2</sub> (0.2 mmol, 2.0 equiv.) and H<sub>2</sub>O (1 mL) were added into the tube and sealed. The reaction mixture was vigorously stirred at 80 °C for 12 h. Then, the reaction mixture was then diluted with EtOAc and filtered through celite pad. After evaporation of the solvent, the crude mixture was purified by preparative Thin-Layer Chromatography (TLC).

### 2.6.3 Radical trapping experiments

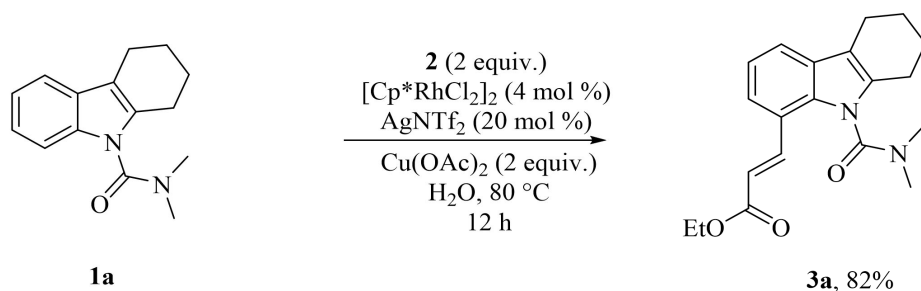

An oven-dried screw cap reaction tube was charged with a magnetic stir-bar, **1a** (0.1 mmol, 1.0 equiv.), **2** (0.2 mmol, 2.0 equiv.),  $[\text{Cp}^*\text{RhCl}_2]_2$  (0.004 mmol, 4 mol%),  $\text{Cu}(\text{OAc})_2$  (0.2 mmol, 2.0 equiv.),  $\text{AgNTf}_2$  (0.02 mmol, 20 mol%) and different proportions of free radical scavenger were taken. Subsequently,  $\text{H}_2\text{O}$  (1 mL) was added and the reaction mixture was stirred vigorously at  $80\text{ }^\circ\text{C}$  for 12 h. The reaction mixture was then diluted with EtOAc and filtered through celite pad. After evaporation of the solvent, NMR yields of **3a** were measured with an internal standard of  $\text{CH}_2\text{Br}_2$  (0.1 mmol).

### 2.6.4 NMR studies:

#### 2.6.4.1 Real-time on-line $^1\text{H}$ NMR monitoring of substrate-Rh-NaOAc interaction

In a clean NMR tube the substrate **1e** (1 equiv.) was added to 500  $\mu\text{l}$  of  $\text{CDCl}_3$ . The  $^1\text{H}$  NMR and  $^{19}\text{F}$  NMR of **1e** was recorded. Then  $[\text{Cp}^*\text{RhCl}_2]_2$  (0.25 equiv.) was added and put for sonication for 30 min at  $80\text{ }^\circ\text{C}$ . The  $^1\text{H}$  NMR and  $^{19}\text{F}$  NMR of the reaction mixture was recorded. Then NaOAc (4 equiv.) was added and put for sonication for 30 min at  $80\text{ }^\circ\text{C}$ . The  $^1\text{H}$  NMR and  $^{19}\text{F}$  NMR of the reaction mixture was recorded.

## 2.6.4.2 C-H olefination monitored by $^1\text{H}$ NMR and $^{19}\text{F}$ NMR spectroscopy

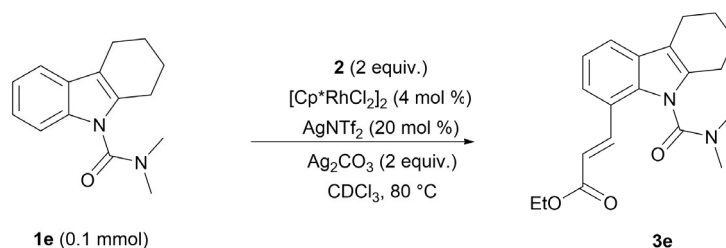

An oven-dried screw cap reaction tube was charged with a magnetic stir-bar, **1a** (0.1 mmol, 1.0 equiv.), **2** (0.2 mmol, 2.0 equiv.),  $[\text{Cp}^*\text{RhCl}_2]_2$  (0.004 mmol, 4 mol%),  $\text{Ag}_2\text{CO}_3$  (0.2 mmol, 2.0 equiv.),  $\text{AgNTf}_2$  (0.02 mmol, 20 mol%) and different proportions of free radical scavenger were taken. Subsequently,  $\text{CDCl}_3$  (1 mL) was added and the reaction mixture was stirred vigorously at  $80^\circ\text{C}$ . The  $^1\text{H}$  NMR and  $^{19}\text{F}$  NMR of the reaction mixture was recorded at 0 h, 1.5 h, 2.5 h, 3.5 h, 6 h.

## 2.6.5 ESI-MS studies:

### 2.6.5.1 ESI-MS study to detect the monomeric Rh-substrate complex II

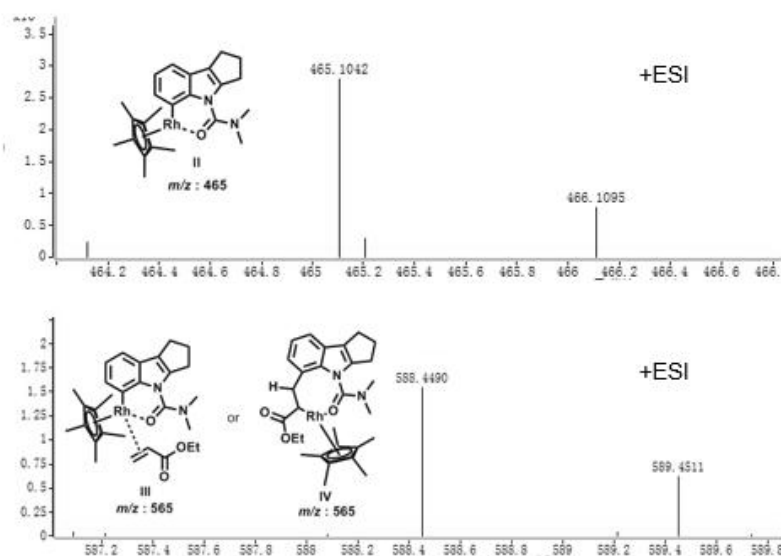

An oven-dried screw cap reaction tube was charged with a magnetic stir-bar, **1u**

(0.1 mmol, 1 equiv.),  $[\text{Cp}^*\text{RhCl}_2]_2$  (0.1 mmol, 1 equiv.), and NaOAc (0.3 mmol, 3 equiv.) were taken. Subsequently, DCE (1 mL) was added and the reaction mixture was stirred at 80 °C for 12 h. After evaporation of the solvent, ESI-MS analysis of the mixture was undertaken.

#### **2.6.5.2 ESI-MS study to detect the monomeric Rh-substrate-olefin complex III or IV**

An oven-dried screw cap reaction tube was charged with a magnetic stir-bar, **1u** (0.1 mmol, 1 equiv.),  $[\text{Cp}^*\text{RhCl}_2]_2$  (0.1 mmol, 1 equiv.), NaOAc (0.3 mmol, 3 equiv.) and **2** (0.2 mmol, 2 equiv.) were taken. Subsequently, DCE (1 mL) was added and the reaction mixture was stirred at 80 °C for 12 h. After evaporation of the solvent, ESI-MS analysis of the mixture was undertaken.

### 3. Spectra for new compounds

#### $^1\text{H}$ NMR spectra of compound **1c**

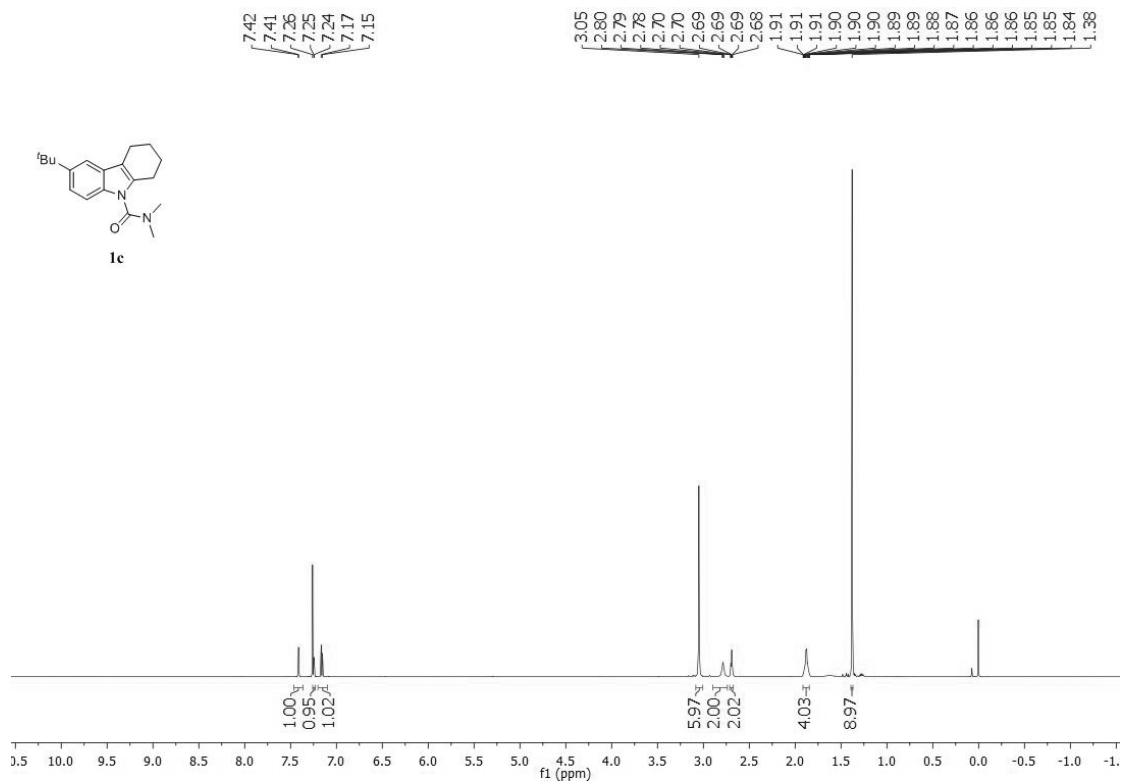

#### $^{13}\text{C}$ NMR spectra of compound **1c**

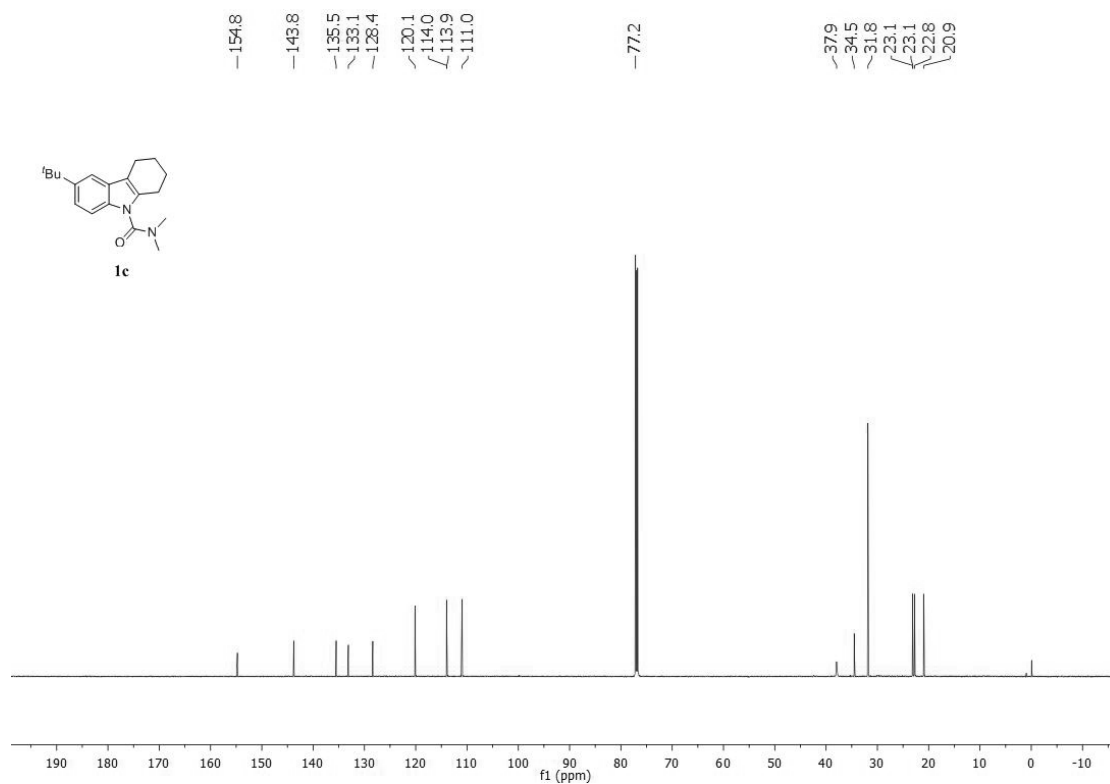

## HRMS spectrum of compound **1c**

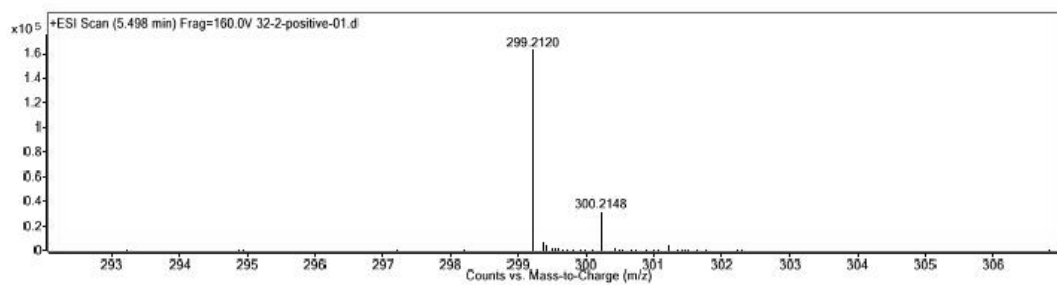

### Elemental Composition Calculator

|                                                  |                                       |                     |                  |                 |                    |
|--------------------------------------------------|---------------------------------------|---------------------|------------------|-----------------|--------------------|
| <b>Target m/z:</b>                               | 299.2120                              | <b>Result type:</b> | Positive ions    | <b>Species:</b> | [M+H] <sup>+</sup> |
| <b>Elements:</b>                                 | C (0-80); H (0-120); O (0-30); N(0-5) |                     |                  |                 |                    |
| <b>Ion Formula</b>                               | <b>Calculated m/z</b>                 |                     | <b>PPM Error</b> |                 |                    |
| C <sub>19</sub> H <sub>27</sub> N <sub>2</sub> O | 299.2118                              |                     | -0.85            |                 |                    |



# <sup>1</sup>H NMR spectra of compound **1e**

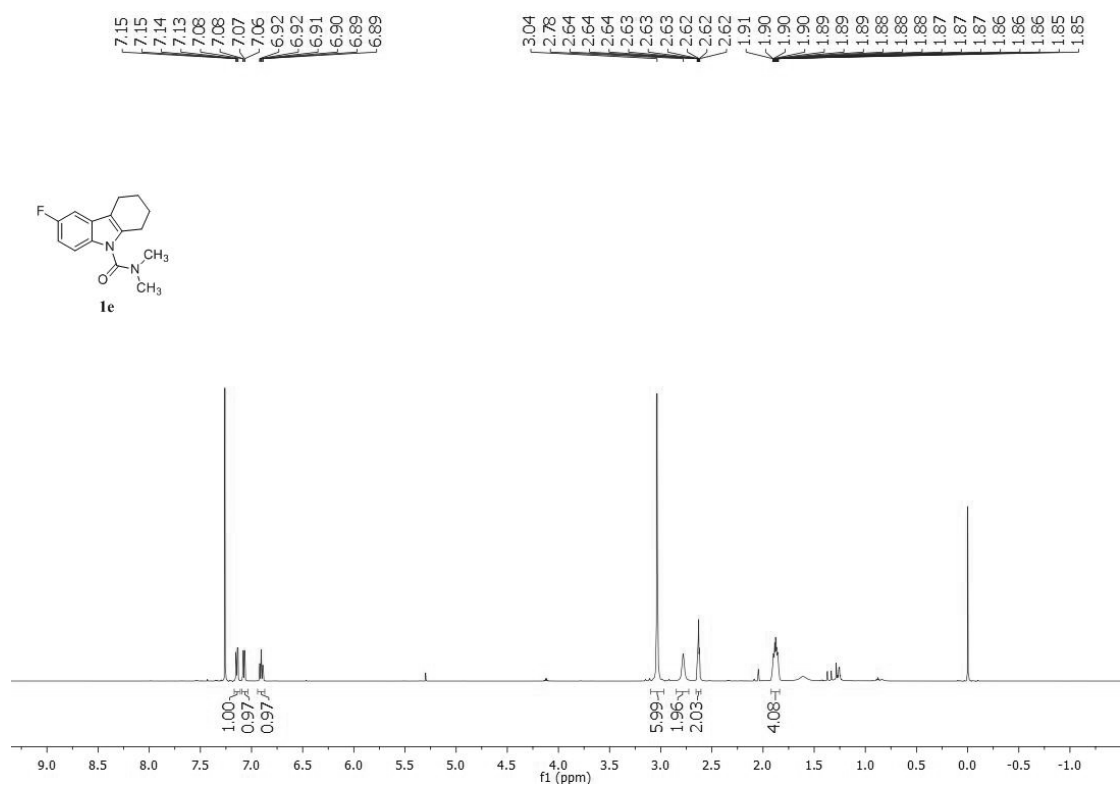

# <sup>13</sup>C NMR spectra of compound **1e**

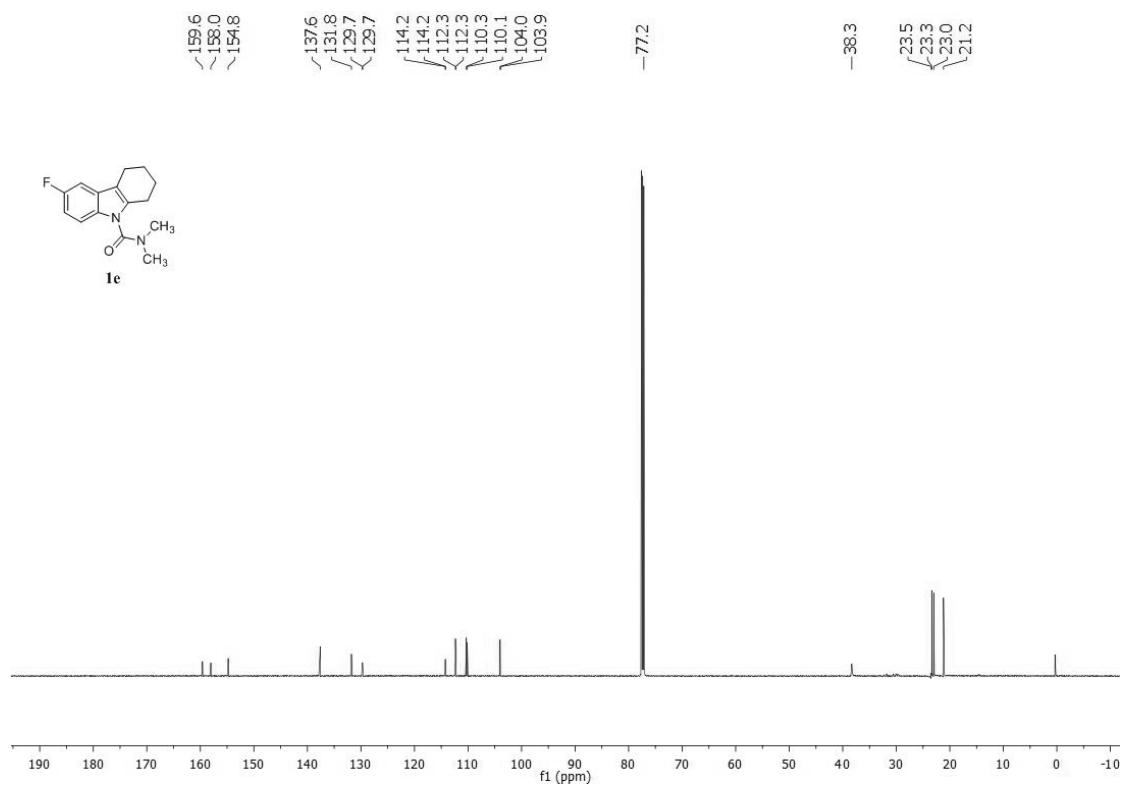

## HRMS spectrum of compound **1e**

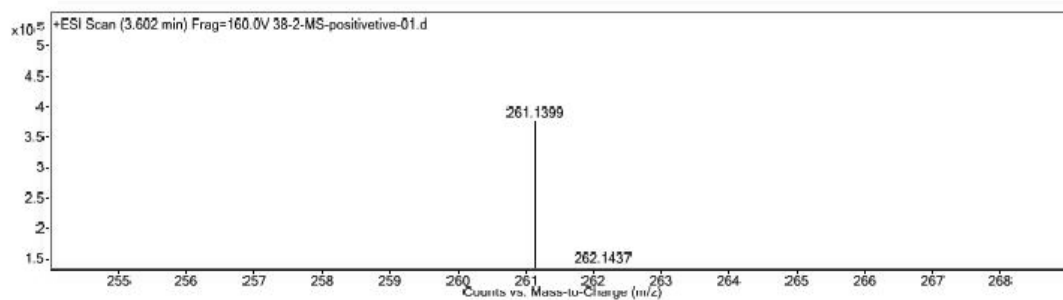

### Elemental Composition Calculator

|                                                   |                                                |                     |                  |                 |                    |
|---------------------------------------------------|------------------------------------------------|---------------------|------------------|-----------------|--------------------|
| <b>Target m/z:</b>                                | 261.1399                                       | <b>Result type:</b> | Positive ions    | <b>Species:</b> | [M+H] <sup>+</sup> |
| <b>Elements:</b>                                  | C (0-80); H (0-120); O (0-30) ; N(0-5); F(0-5) |                     |                  |                 |                    |
| <b>Ion Formula</b>                                | <b>Calculated m/z</b>                          |                     | <b>PPM Error</b> |                 |                    |
| C <sub>15</sub> H <sub>18</sub> FN <sub>2</sub> O | 261.1398                                       |                     | -0.42            |                 |                    |

# <sup>1</sup>H NMR spectra of compound **1h**

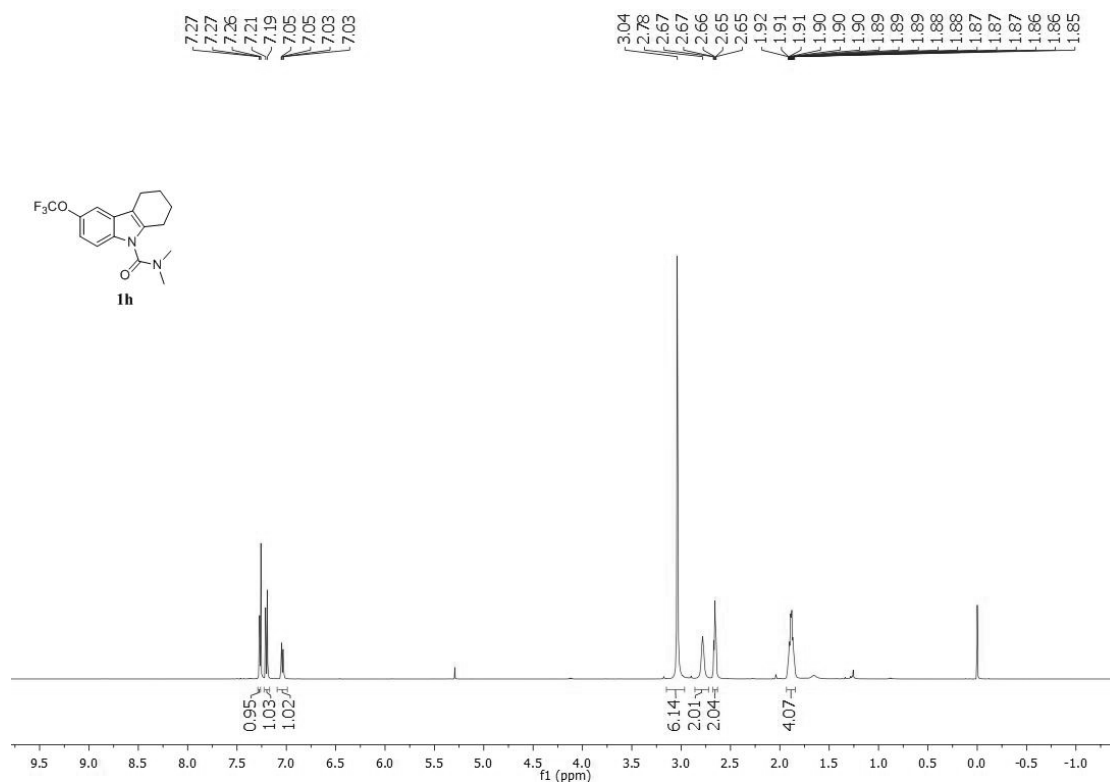

# <sup>13</sup>C NMR spectra of compound **1h**

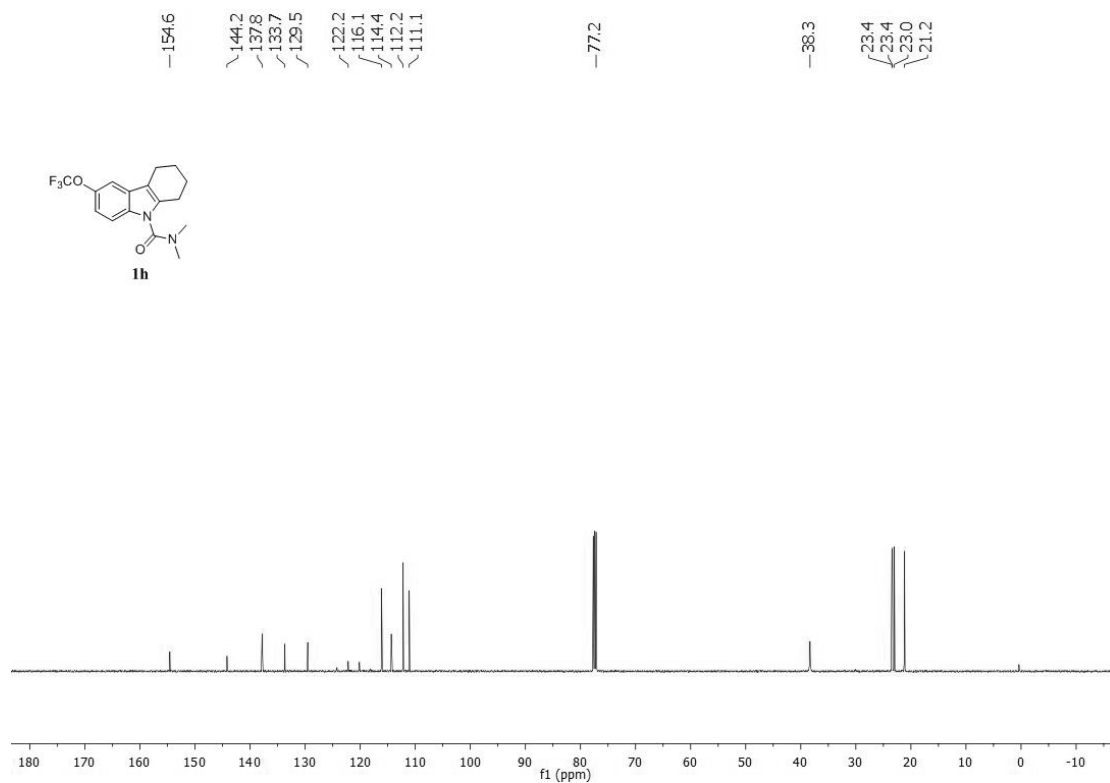

## HRMS spectrum of compound **1h**

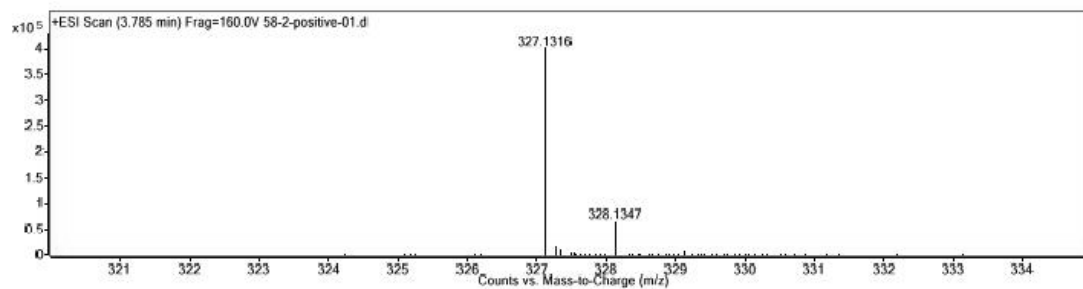

### Elemental Composition Calculator

|                                                                              |                                               |                     |                  |                 |                    |
|------------------------------------------------------------------------------|-----------------------------------------------|---------------------|------------------|-----------------|--------------------|
| <b>Target m/z:</b>                                                           | 327.1316                                      | <b>Result type:</b> | Positive ions    | <b>Species:</b> | [M+H] <sup>+</sup> |
| <b>Elements:</b>                                                             | C (0-80); H (0-120); O (0-30); N(0-5); F(0-5) |                     |                  |                 |                    |
| <b>Ion Formula</b>                                                           | <b>Calculated m/z</b>                         |                     | <b>PPM Error</b> |                 |                    |
| C <sub>16</sub> H <sub>18</sub> F <sub>3</sub> N <sub>2</sub> O <sub>2</sub> | 327.1315                                      |                     | -0.25            |                 |                    |

### <sup>1</sup>H NMR spectra of compound **1i**

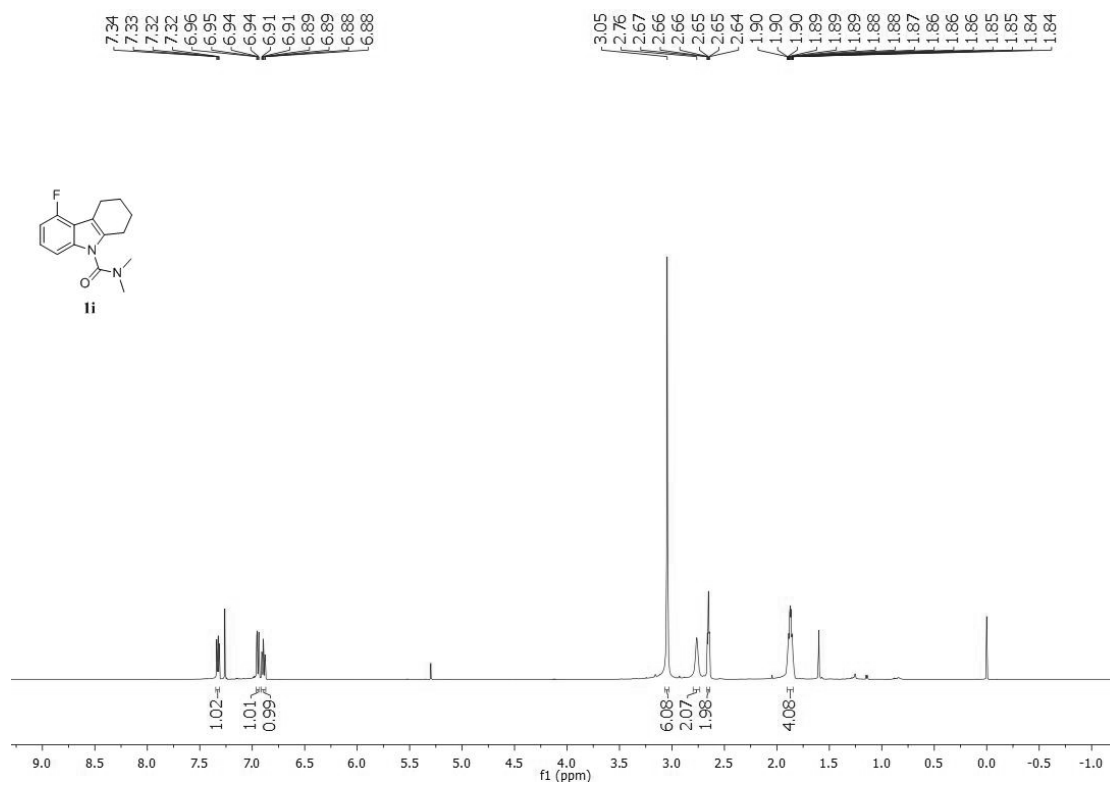

### <sup>13</sup>C NMR spectra of compound **1i**

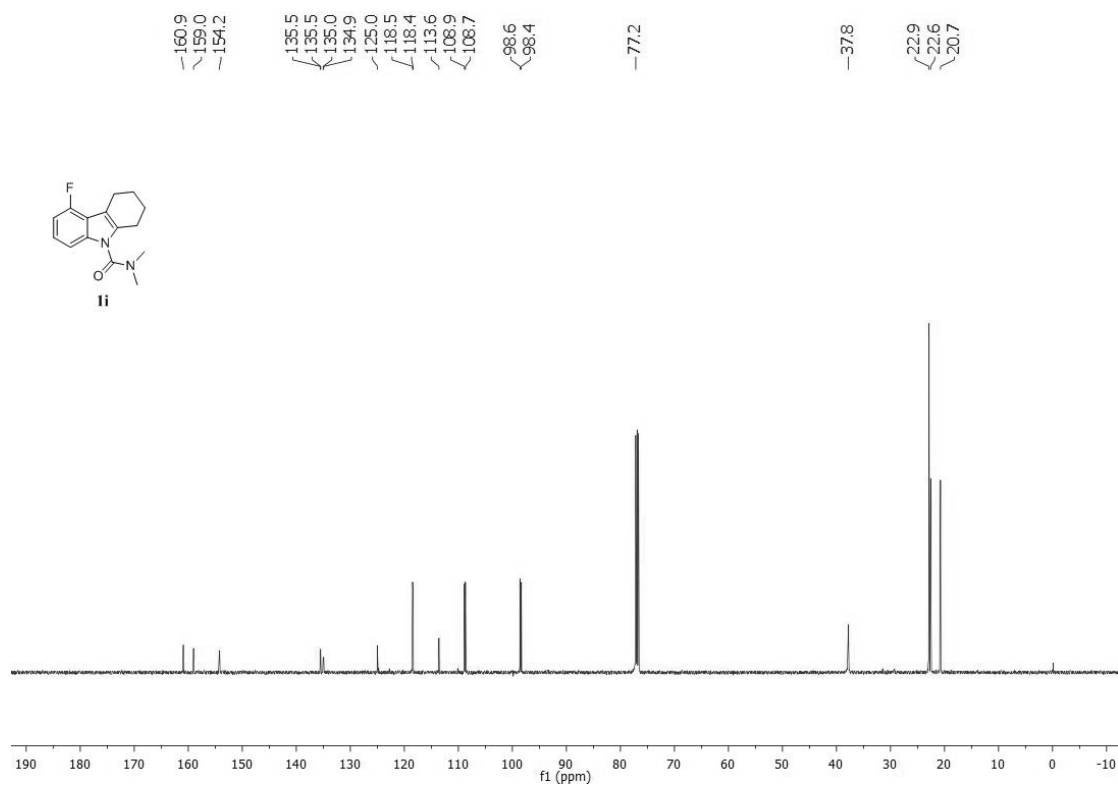

## HRMS spectrum of compound **1i**

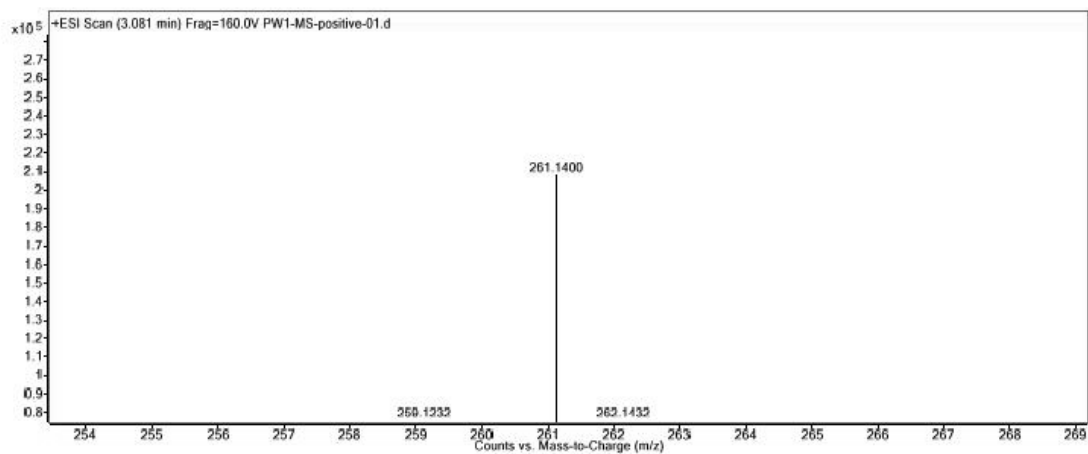

### Elemental Composition Calculator

|                                                   |                                                 |                     |                  |                 |                    |
|---------------------------------------------------|-------------------------------------------------|---------------------|------------------|-----------------|--------------------|
| <b>Target m/z:</b>                                | 261.1400                                        | <b>Result type:</b> | Positive ions    | <b>Species:</b> | [M+H] <sup>+</sup> |
| <b>Elements:</b>                                  | C (0-80); H (0-120); O (0-30); F (0-5); N (0-5) |                     |                  |                 |                    |
| <b>Ion Formula</b>                                | <b>Calculated m/z</b>                           |                     | <b>PPM Error</b> |                 |                    |
| C <sub>15</sub> H <sub>18</sub> FN <sub>2</sub> O | 261.1398                                        |                     | -0.85            |                 |                    |

### <sup>1</sup>H NMR spectra of compound **1j**

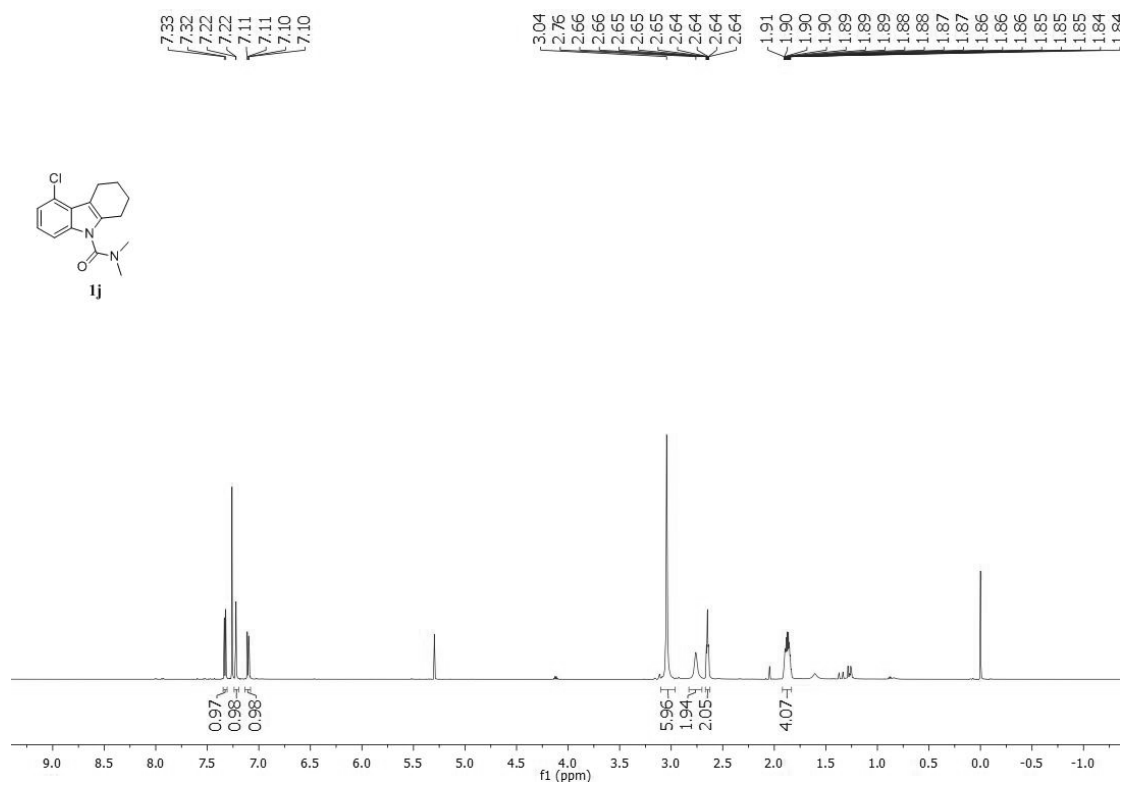

### <sup>13</sup>C NMR spectra of compound **1j**

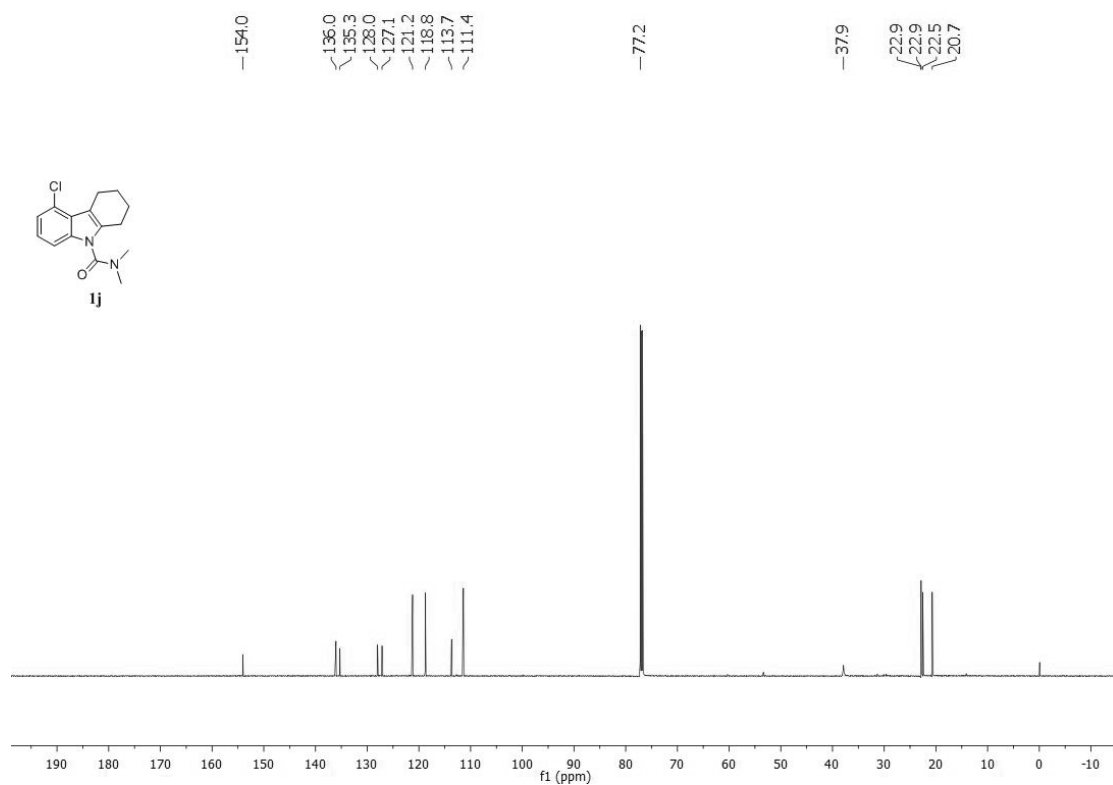

## HRMS spectrum of compound **1j**

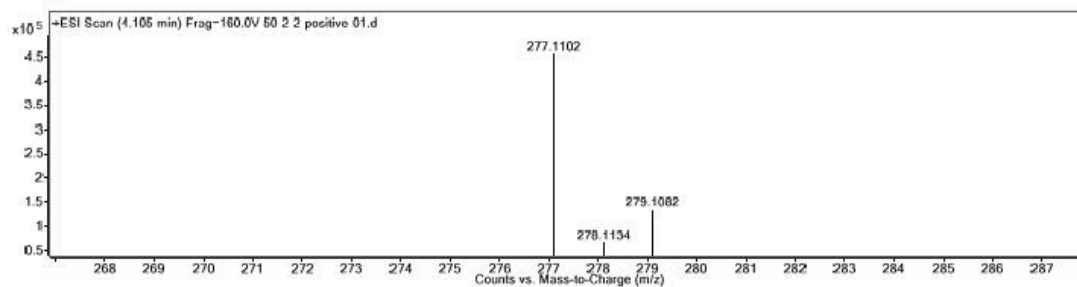

### Elemental Composition Calculator

|                                                    |                                                |                     |                  |                 |                    |
|----------------------------------------------------|------------------------------------------------|---------------------|------------------|-----------------|--------------------|
| <b>Target m/z:</b>                                 | 277.1102                                       | <b>Result type:</b> | Positive ions    | <b>Species:</b> | [M+H] <sup>+</sup> |
| <b>Elements:</b>                                   | C (0-80); H (0-120); O (0-30); N(0-5); Cl(0-5) |                     |                  |                 |                    |
| <b>Ion Formula</b>                                 | <b>Calculated m/z</b>                          |                     | <b>PPM Error</b> |                 |                    |
| C <sub>15</sub> H <sub>18</sub> ClN <sub>2</sub> O | 277.1102                                       |                     | -0.01            |                 |                    |



### <sup>1</sup>H NMR spectra of compound **1k**

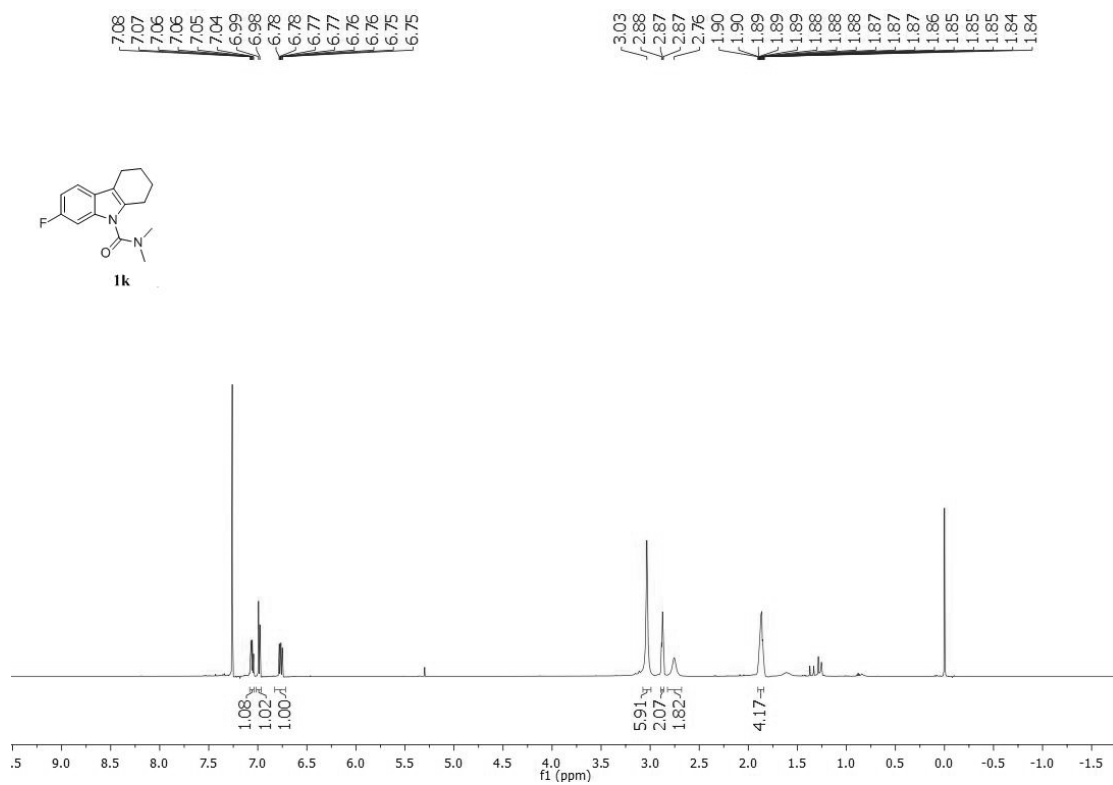

### <sup>13</sup>C NMR spectra of compound **1k**

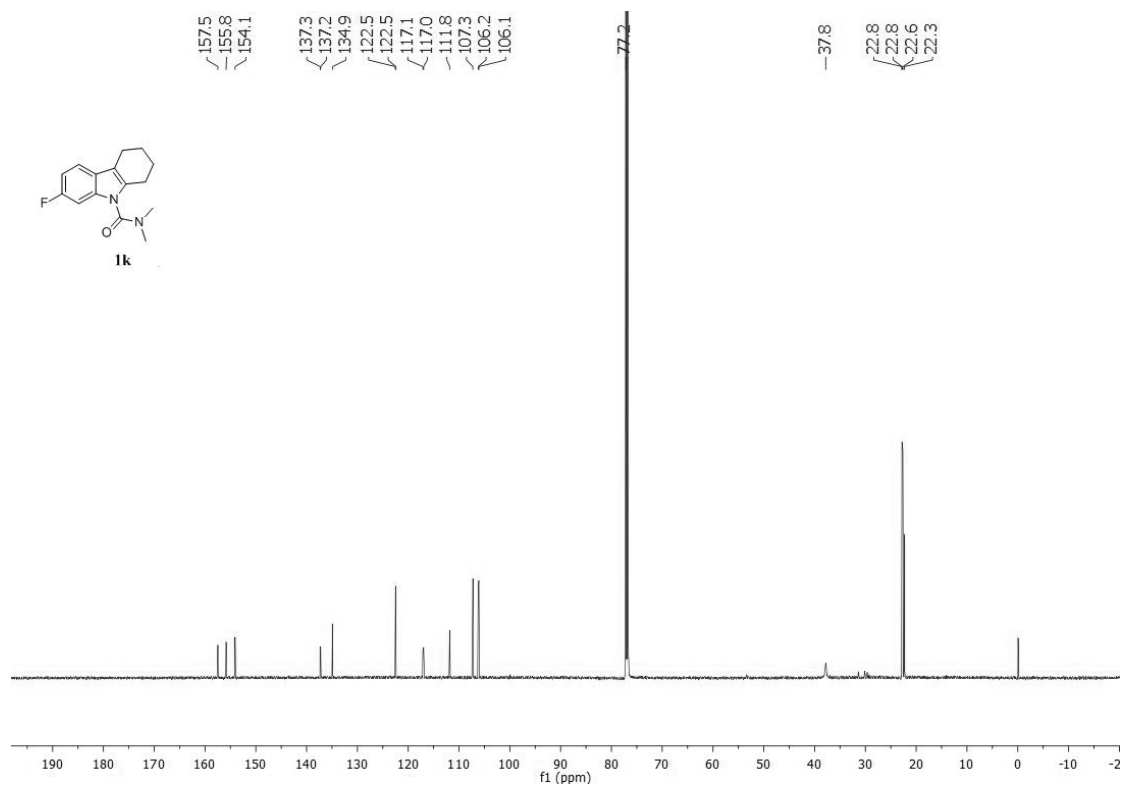

## HRMS spectrum of compound **1k**

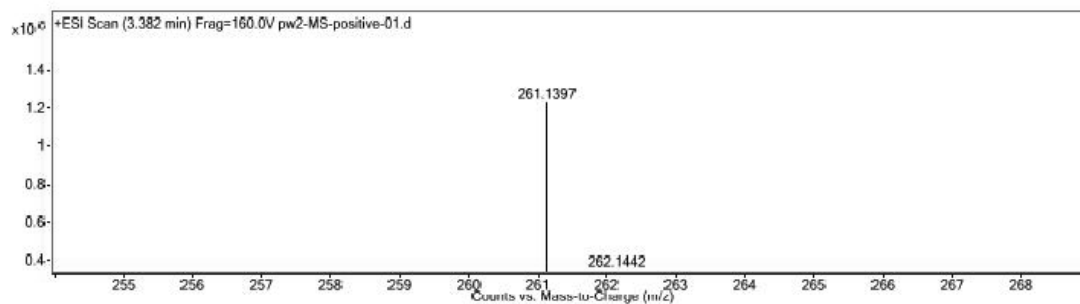

### Elemental Composition Calculator

|                    |                                               |                     |                  |                 |                    |
|--------------------|-----------------------------------------------|---------------------|------------------|-----------------|--------------------|
| <b>Target m/z:</b> | 261.1397                                      | <b>Result type:</b> | Positive ions    | <b>Species:</b> | [M+H] <sup>+</sup> |
| <b>Elements:</b>   | C (0-80); H (0-120); O (0-30); N(0-5); F(0-5) |                     |                  |                 |                    |
| <b>Ion Formula</b> | <b>Calculated m/z</b>                         |                     | <b>PPM Error</b> |                 |                    |
| C15H18FN2O         | 261.1398                                      |                     | 0.44             |                 |                    |

# <sup>1</sup>H NMR spectra of compound **11**

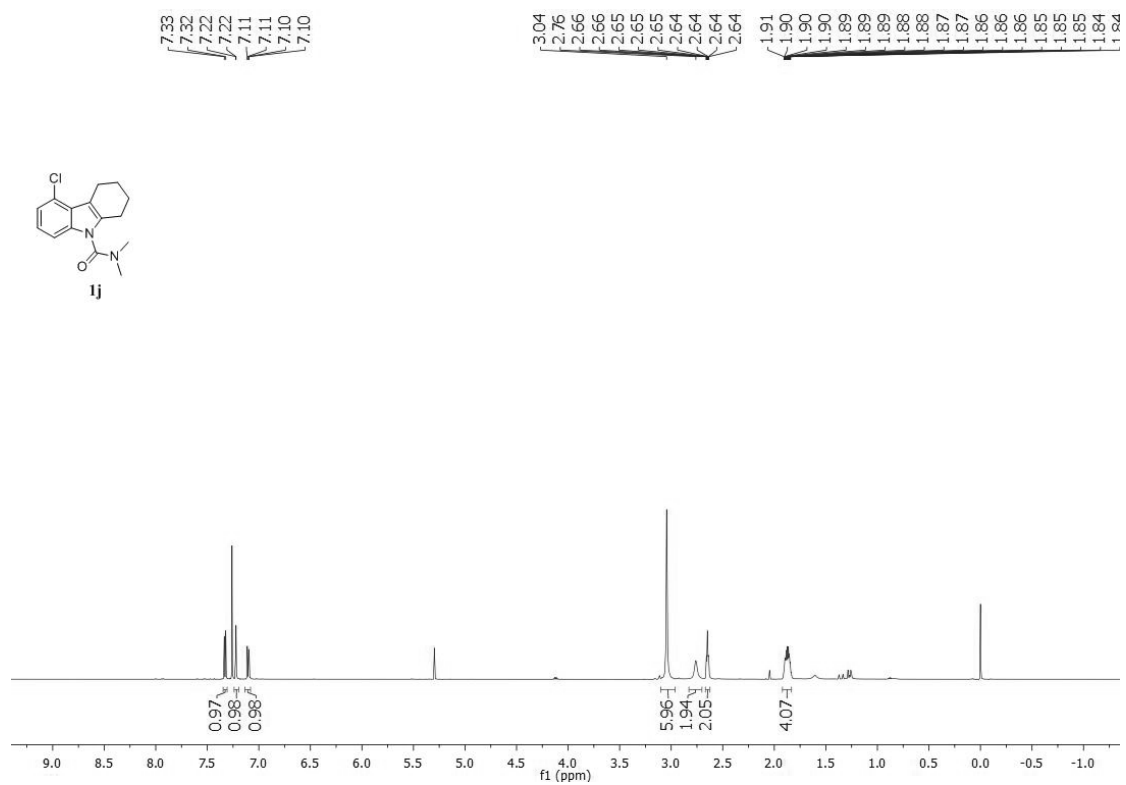

# <sup>13</sup>C NMR spectra of compound **11**

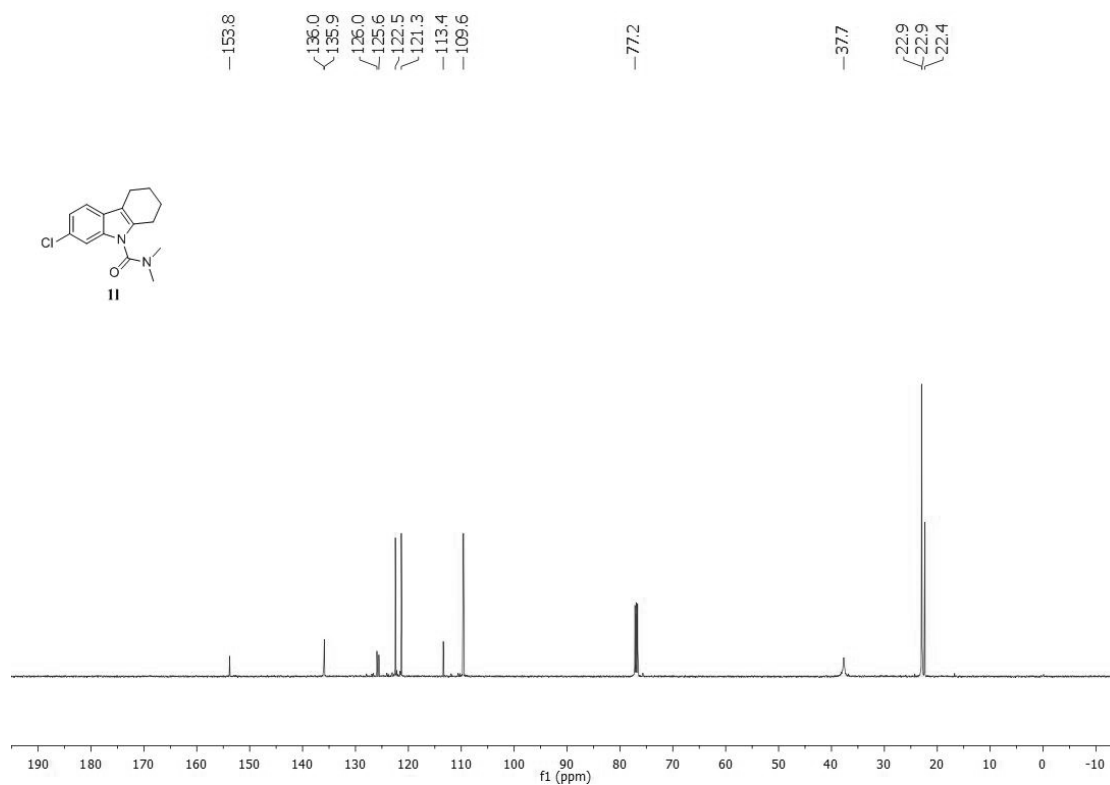

## HRMS spectrum of compound **11**

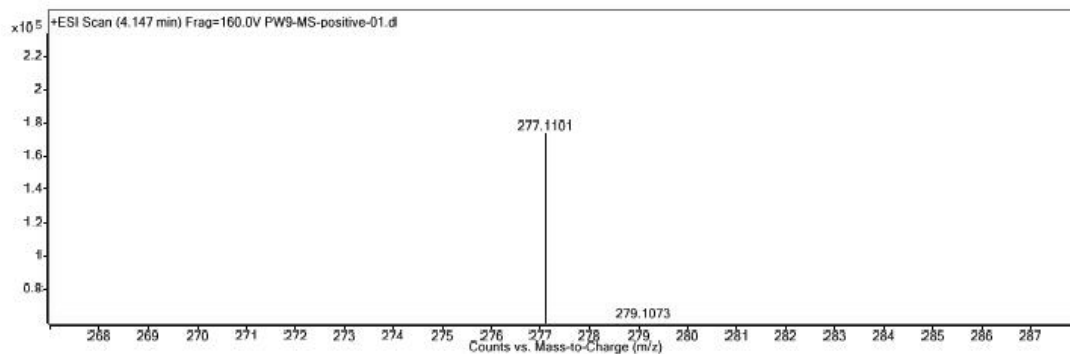

### Elemental Composition Calculator

|                                                    |                                                |                     |               |                 |                    |
|----------------------------------------------------|------------------------------------------------|---------------------|---------------|-----------------|--------------------|
| <b>Target m/z:</b>                                 | 277.1101                                       | <b>Result type:</b> | Positive ions | <b>Species:</b> | [M+H] <sup>+</sup> |
| <b>Elements:</b>                                   | C (0-80); H (0-120); O (0-30); N(0-5); Cl(0-5) |                     |               |                 |                    |
| <b>Ion Formula</b>                                 | <b>Calculated m/z</b>                          | <b>PPM Error</b>    |               |                 |                    |
| C <sub>15</sub> H <sub>18</sub> ClN <sub>2</sub> O | 277.1102                                       | 0.55                |               |                 |                    |

# $^1\text{H}$ NMR spectra of compound **1m**

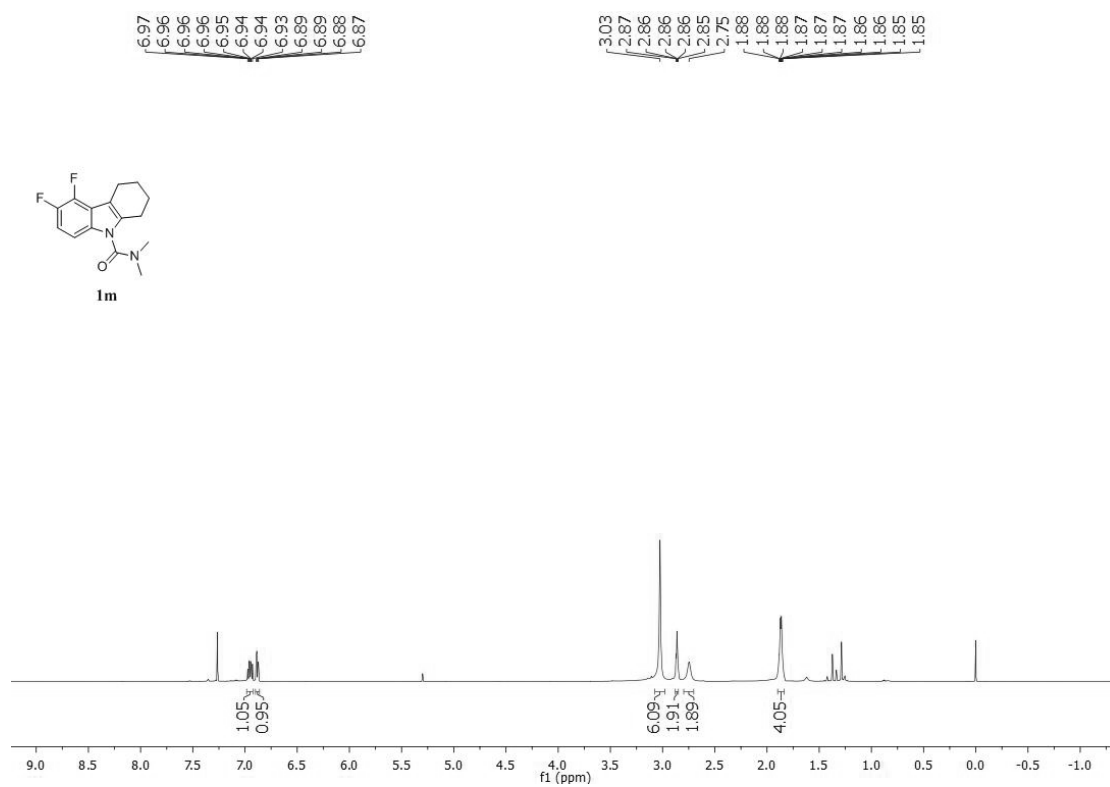

# $^{13}\text{C}$ NMR spectra of compound **1m**

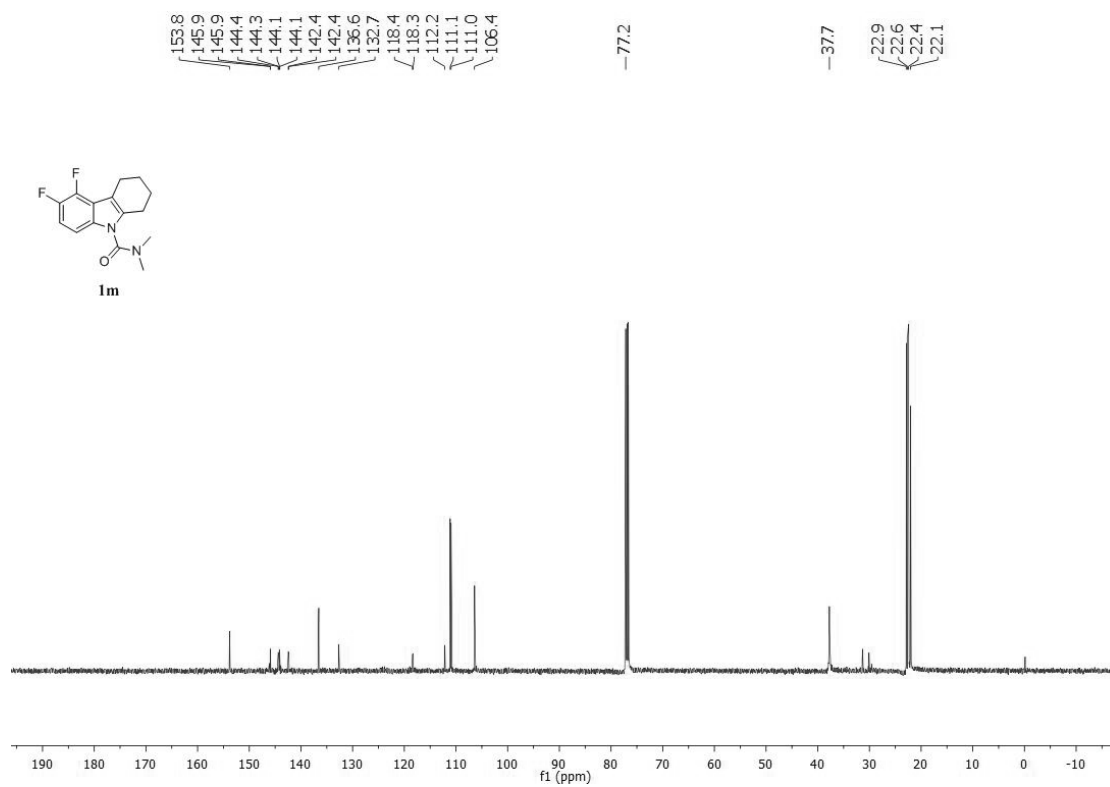

## HRMS spectrum of compound **1m**

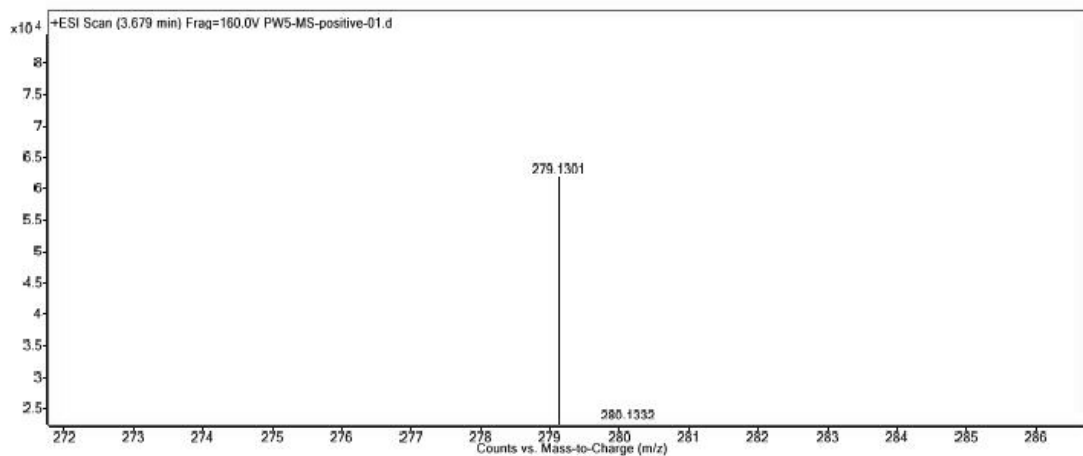

### Elemental Composition Calculator

|                                                                 |                                                 |                     |                  |                 |           |
|-----------------------------------------------------------------|-------------------------------------------------|---------------------|------------------|-----------------|-----------|
| <b>Target m/z:</b>                                              | 279.1301                                        | <b>Result type:</b> | Positive ions    | <b>Species:</b> | $[M+H]^+$ |
| <b>Elements:</b>                                                | C (0-80); H (0-120); O (0-30); N (0-5); F (0-5) |                     |                  |                 |           |
| <b>Ion Formula</b>                                              | <b>Calculated m/z</b>                           |                     | <b>PPM Error</b> |                 |           |
| C <sub>15</sub> H <sub>17</sub> F <sub>2</sub> N <sub>2</sub> O | 279.1303                                        |                     | 0.76             |                 |           |

### <sup>1</sup>H NMR spectra of compound **1n**

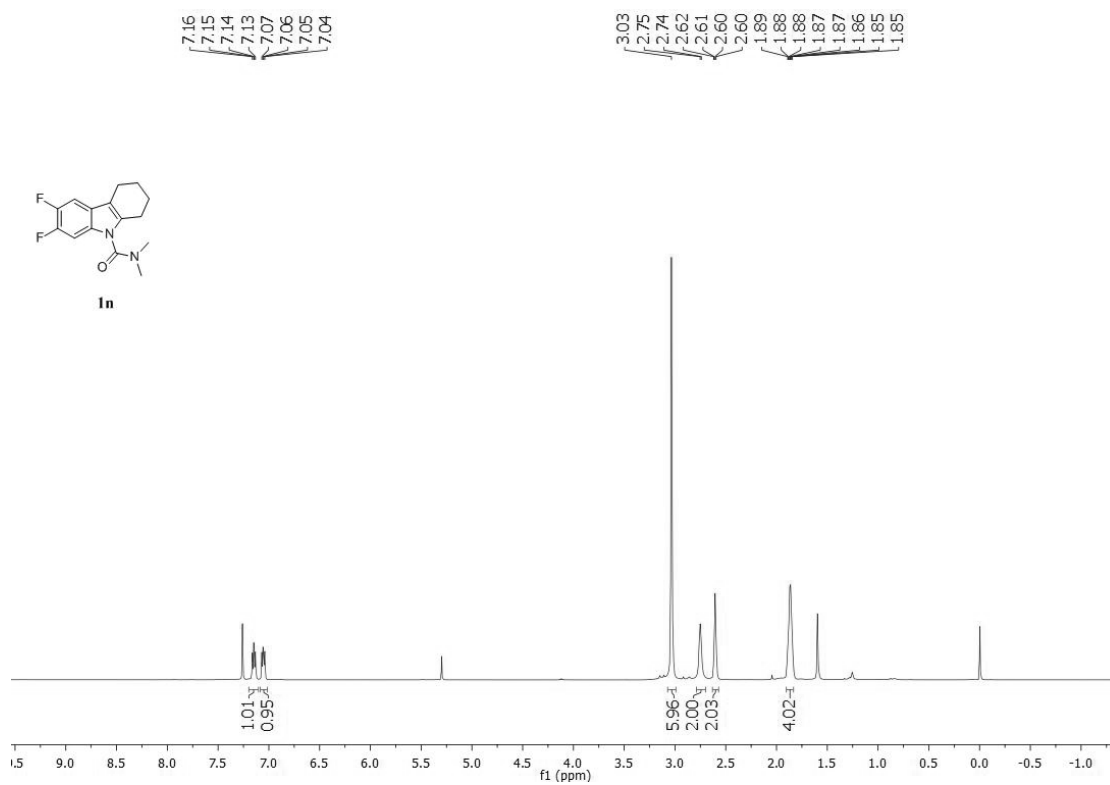

### <sup>13</sup>C NMR spectra of compound **1n**

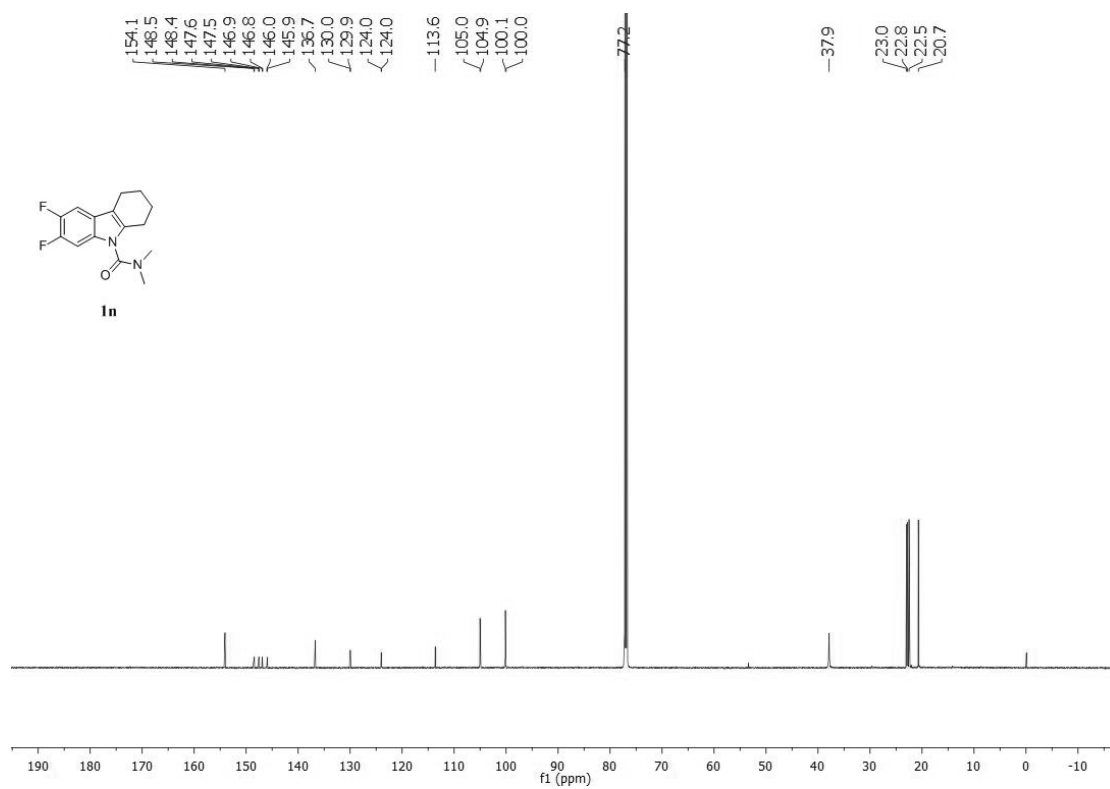

## HRMS spectrum of compound **1n**

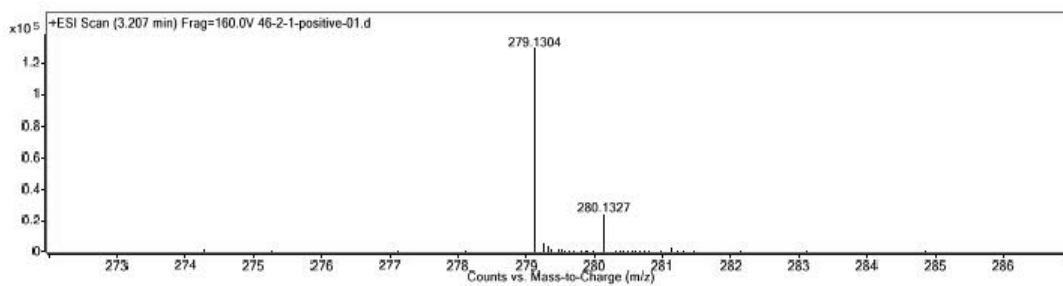

### Elemental Composition Calculator

|                                                                 |                                               |                     |               |                 |                    |
|-----------------------------------------------------------------|-----------------------------------------------|---------------------|---------------|-----------------|--------------------|
| <b>Target m/z:</b>                                              | 279.1304                                      | <b>Result type:</b> | Positive ions | <b>Species:</b> | [M+H] <sup>+</sup> |
| <b>Elements:</b>                                                | C (0-80); H (0-120); O (0-30); N(0-5); F(0-5) |                     |               |                 |                    |
| <b>Ion Formula</b>                                              | <b>Calculated m/z</b>                         | <b>PPM Error</b>    |               |                 |                    |
| C <sub>15</sub> H <sub>17</sub> F <sub>2</sub> N <sub>2</sub> O | 279.1303                                      | -0.27               |               |                 |                    |



### <sup>1</sup>H NMR spectra of compound **1o**

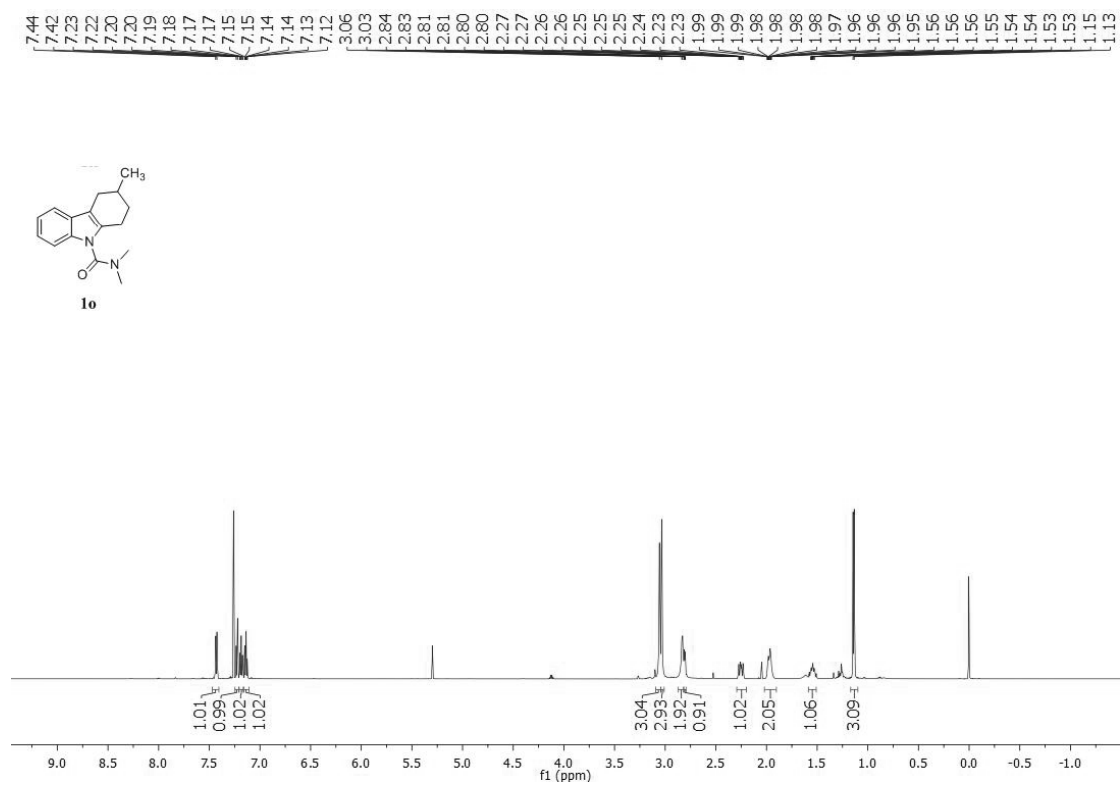

### <sup>13</sup>C NMR spectra of compound **1o**

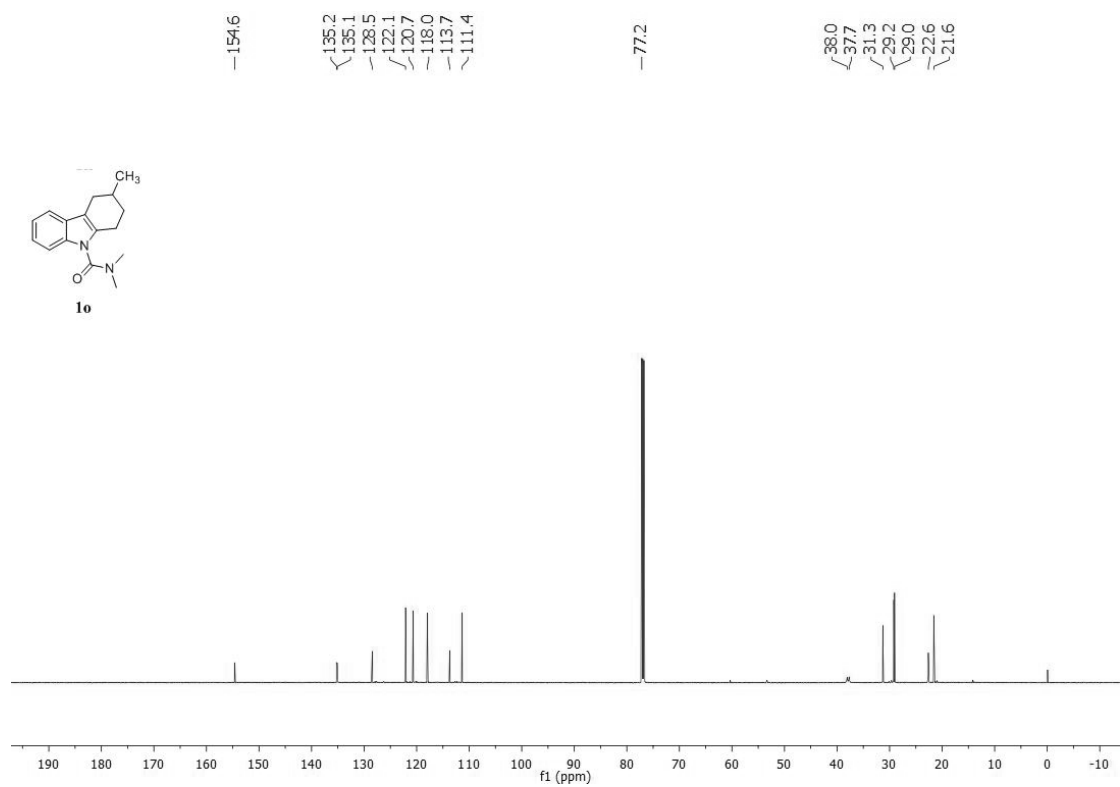

## HRMS spectrum of compound **1o**

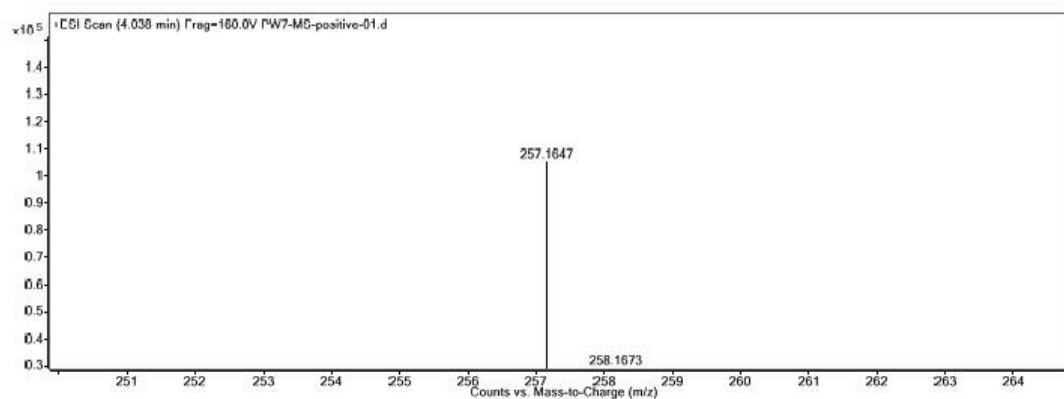

### Elemental Composition Calculator

|                                                  |                                       |                     |                  |                 |                    |
|--------------------------------------------------|---------------------------------------|---------------------|------------------|-----------------|--------------------|
| <b>Target m/z:</b>                               | 257.1647                              | <b>Result type:</b> | Positive ions    | <b>Species:</b> | [M+H] <sup>+</sup> |
| <b>Elements:</b>                                 | C (0-80); H (0-120); O (0-30); N(0-5) |                     |                  |                 |                    |
| <b>Ion Formula</b>                               | <b>Calculated m/z</b>                 |                     | <b>PPM Error</b> |                 |                    |
| C <sub>16</sub> H <sub>21</sub> N <sub>2</sub> O | 257.1648                              |                     | 0.66             |                 |                    |

### <sup>1</sup>H NMR spectra of compound **1p**

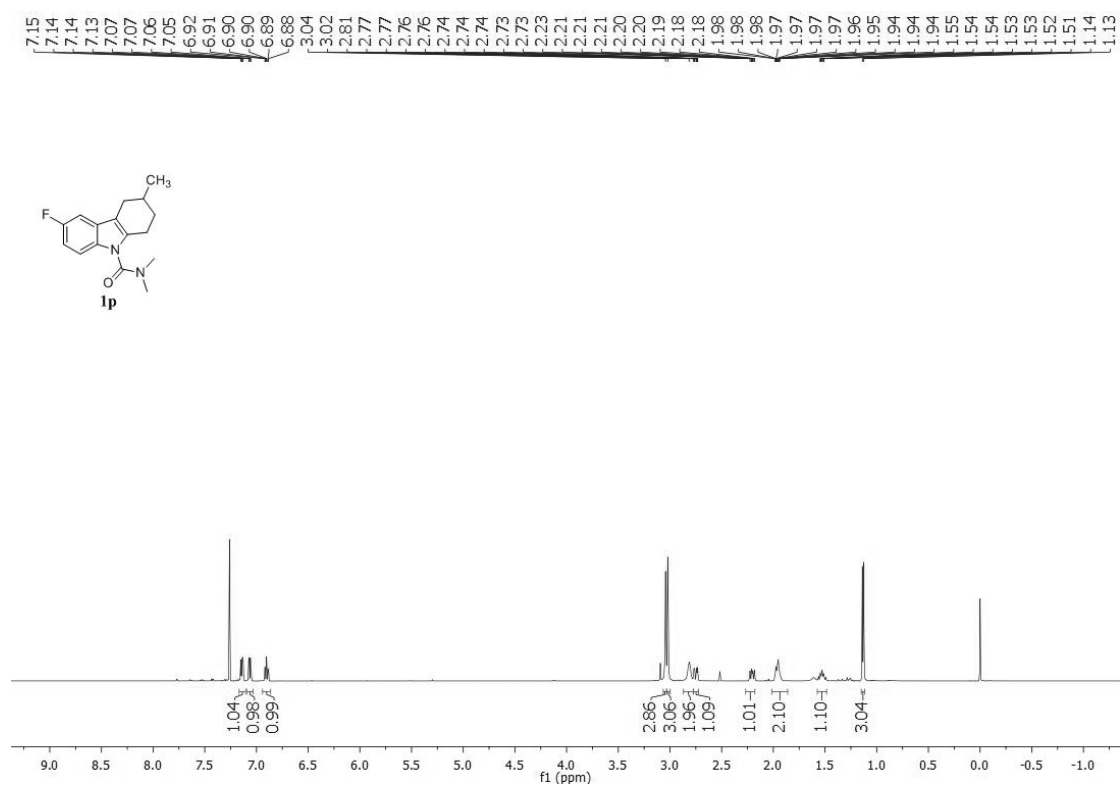

### <sup>13</sup>C NMR spectra of compound **1p**

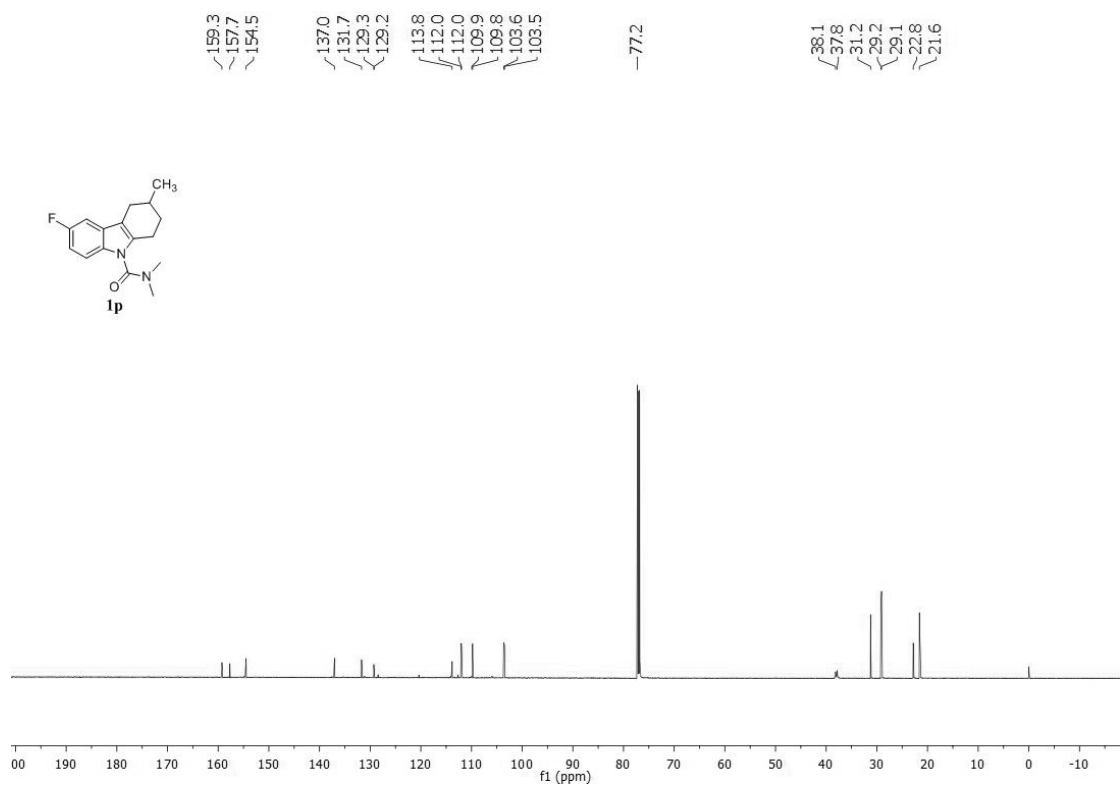

## HRMS spectrum of compound **1p**

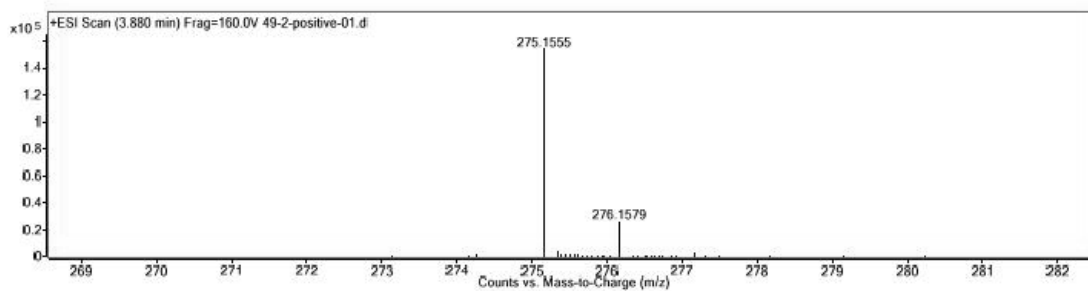

### Elemental Composition Calculator

|                                                   |                                               |                     |                  |                 |                    |
|---------------------------------------------------|-----------------------------------------------|---------------------|------------------|-----------------|--------------------|
| <b>Target m/z:</b>                                | 275.1555                                      | <b>Result type:</b> | Positive ions    | <b>Species:</b> | [M+H] <sup>+</sup> |
| <b>Elements:</b>                                  | C (0-80); H (0-120); O (0-30); N(0-5); F(0-5) |                     |                  |                 |                    |
| <b>Ion Formula</b>                                | <b>Calculated m/z</b>                         |                     | <b>PPM Error</b> |                 |                    |
| C <sub>16</sub> H <sub>20</sub> FN <sub>2</sub> O | 275.1554                                      |                     | -0.12            |                 |                    |

### <sup>1</sup>H NMR spectra of compound **1q**

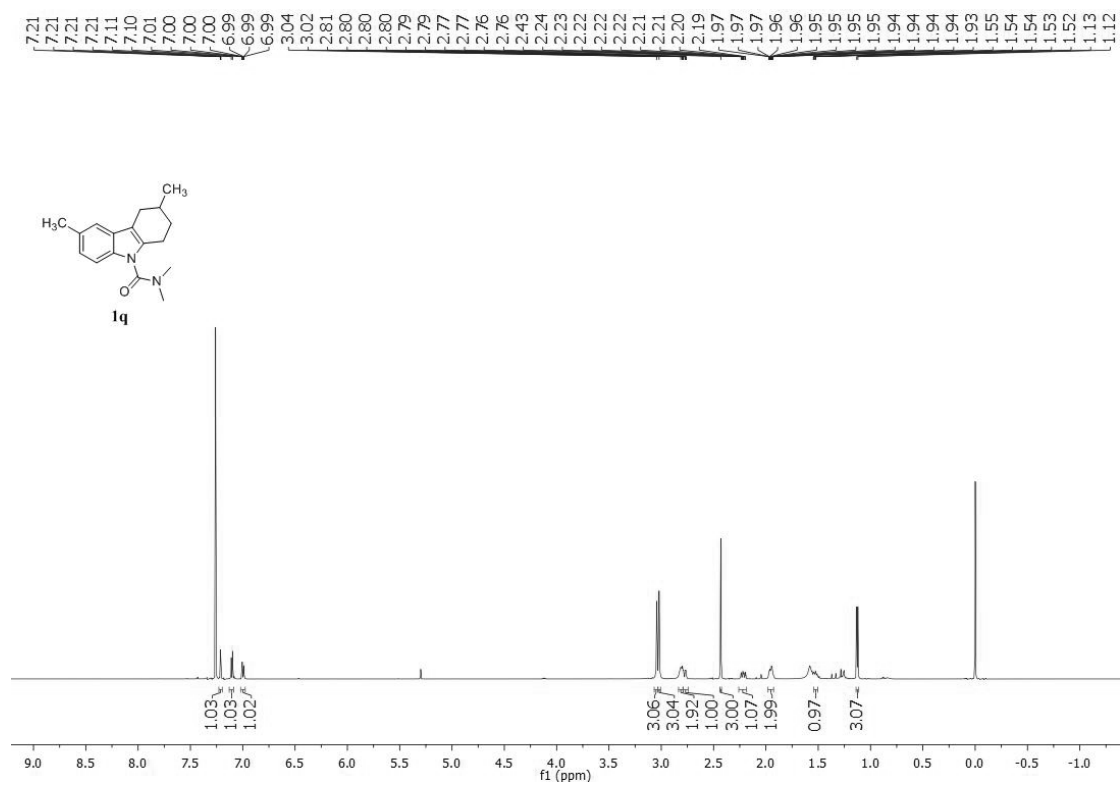

### <sup>13</sup>C NMR spectra of compound **1q**

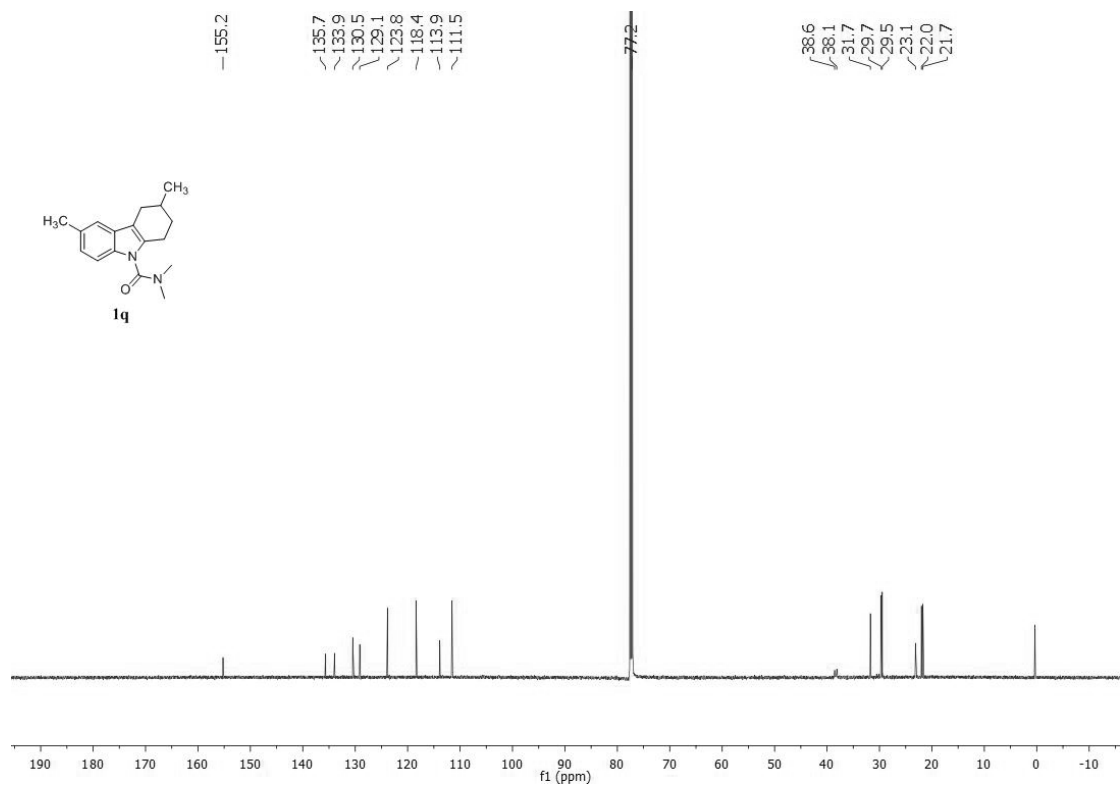

## HRMS spectrum of compound **1q**

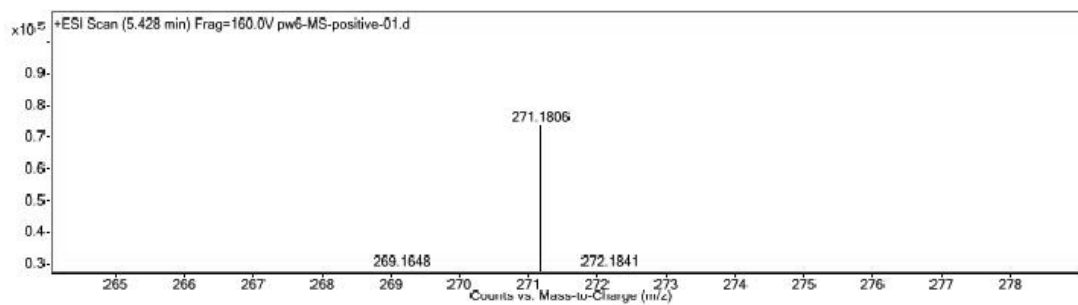

### Elemental Composition Calculator

|                                                  |                                       |                     |                  |                 |                    |
|--------------------------------------------------|---------------------------------------|---------------------|------------------|-----------------|--------------------|
| <b>Target m/z:</b>                               | 271.1806                              | <b>Result type:</b> | Positive ions    | <b>Species:</b> | [M+H] <sup>+</sup> |
| <b>Elements:</b>                                 | C (0-80); H (0-120); O (0-30); N(0-5) |                     |                  |                 |                    |
| <b>Ion Formula</b>                               | <b>Calculated m/z</b>                 |                     | <b>PPM Error</b> |                 |                    |
| C <sub>17</sub> H <sub>23</sub> N <sub>2</sub> O | 271.1805                              |                     | -0.47            |                 |                    |

### <sup>1</sup>H NMR spectra of compound **1r**

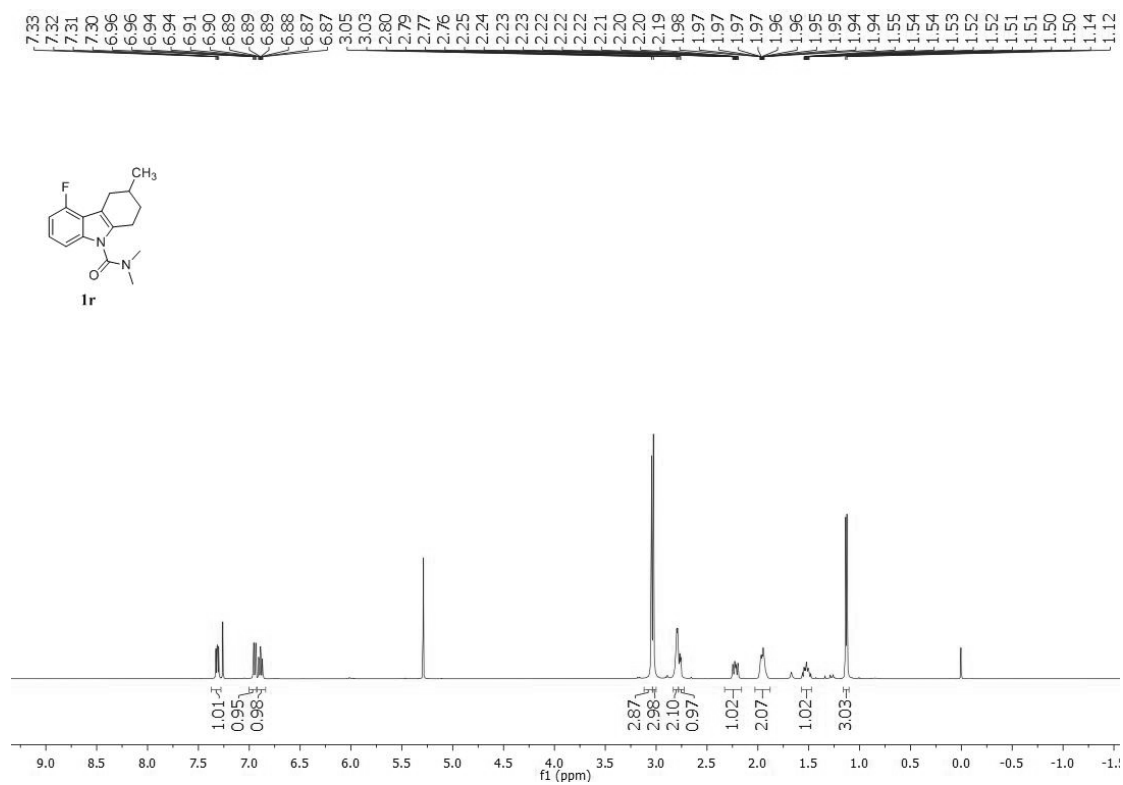

### <sup>13</sup>C NMR spectra of compound **1r**

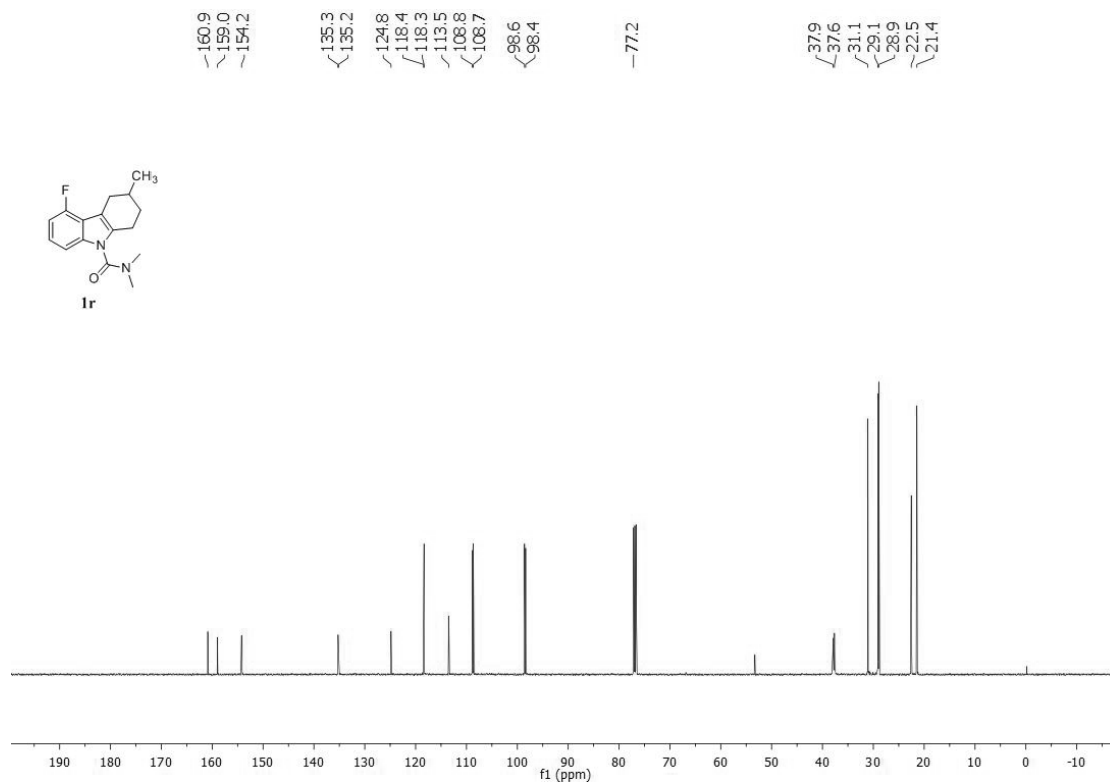

## HRMS spectrum of compound **1r**

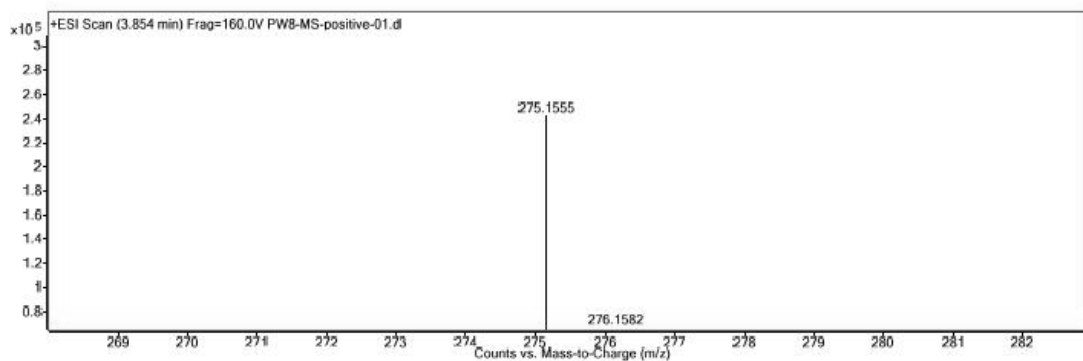

### Elemental Composition Calculator

|                                                   |                                                 |                     |                  |                 |                    |
|---------------------------------------------------|-------------------------------------------------|---------------------|------------------|-----------------|--------------------|
| <b>Target m/z:</b>                                | 275.1555                                        | <b>Result type:</b> | Positive ions    | <b>Species:</b> | [M+H] <sup>+</sup> |
| <b>Elements:</b>                                  | C (0-80); H (0-120); O (0-30) ; N(0-5) ; F(0-5) |                     |                  |                 |                    |
| <b>Ion Formula</b>                                | <b>Calculated m/z</b>                           |                     | <b>PPM Error</b> |                 |                    |
| C <sub>16</sub> H <sub>20</sub> FN <sub>2</sub> O | 275.1554                                        |                     | -0.15            |                 |                    |



# <sup>1</sup>H NMR spectra of compound **1s**

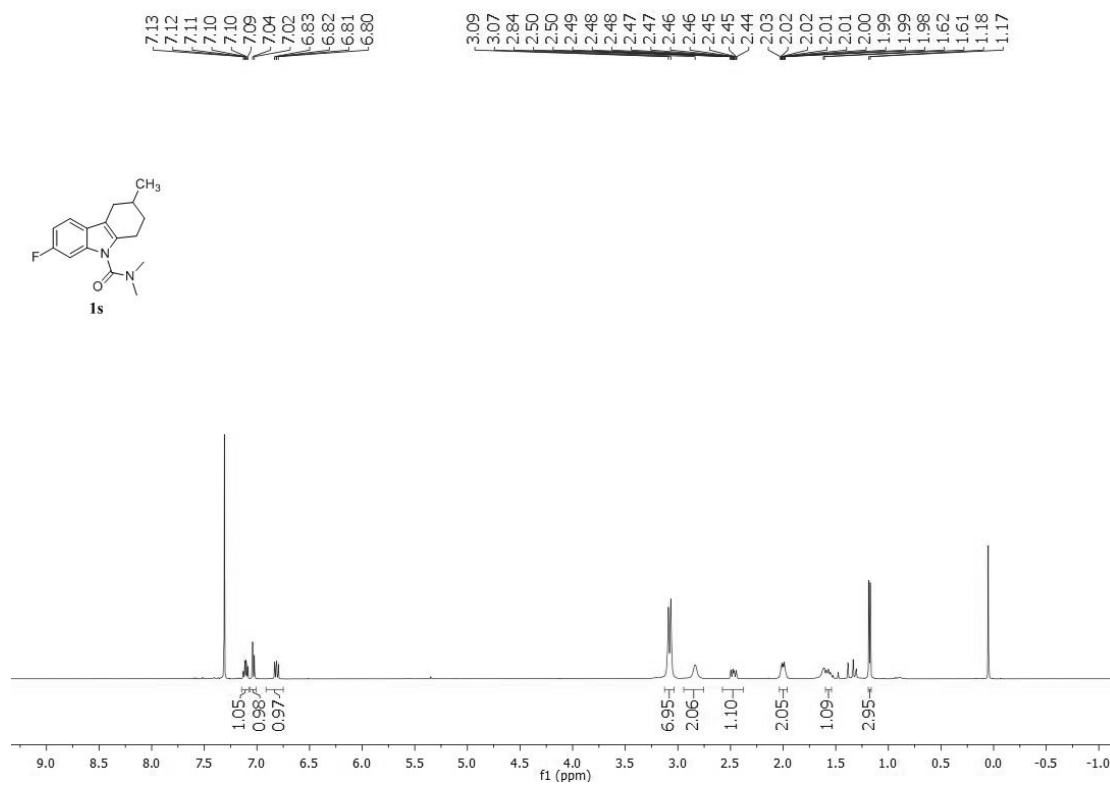

# <sup>13</sup>C NMR spectra of compound **1s**

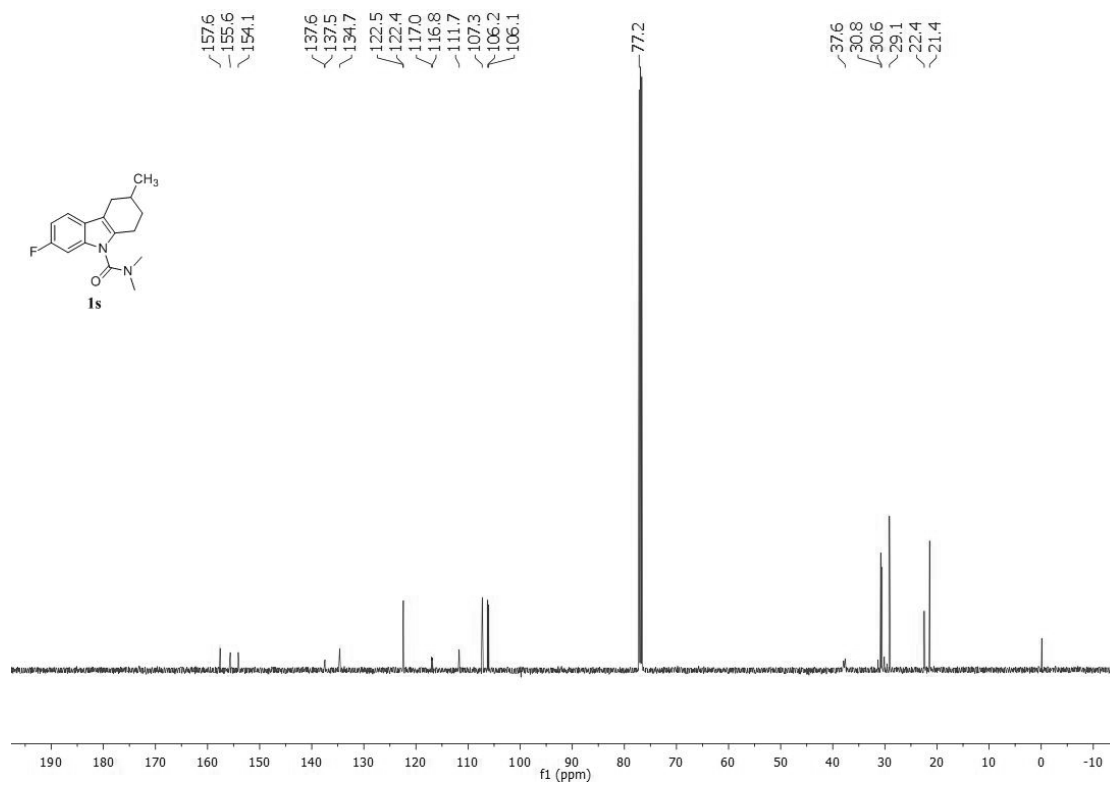

## HRMS spectrum of compound **1s**

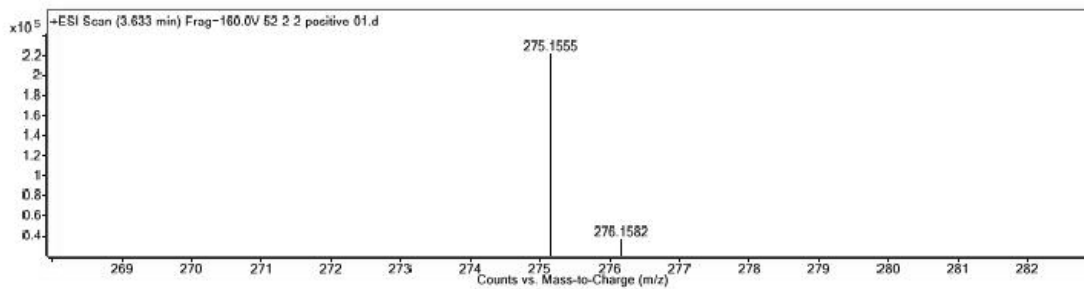

### Elemental Composition Calculator

|                                                   |                                               |                     |                  |                 |                    |
|---------------------------------------------------|-----------------------------------------------|---------------------|------------------|-----------------|--------------------|
| <b>Target m/z:</b>                                | 275.1555                                      | <b>Result type:</b> | Positive ions    | <b>Species:</b> | [M+H] <sup>+</sup> |
| <b>Elements:</b>                                  | C (0-80); H (0-120); O (0-30); N(0-5); F(0-5) |                     |                  |                 |                    |
| <b>Ion Formula</b>                                | <b>Calculated m/z</b>                         |                     | <b>PPM Error</b> |                 |                    |
| C <sub>16</sub> H <sub>20</sub> FN <sub>2</sub> O | 275.1554                                      |                     | -0.24            |                 |                    |

# <sup>1</sup>H NMR spectra of compound **1t**

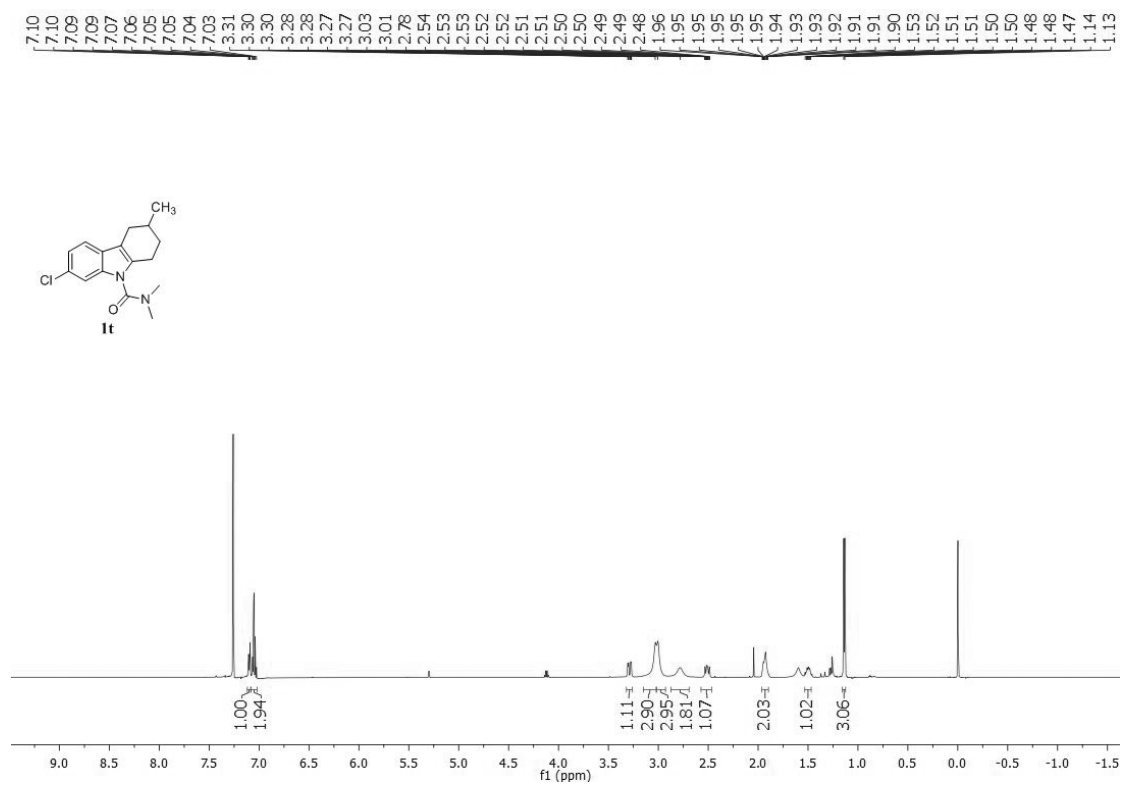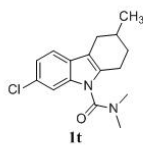

# <sup>13</sup>C NMR spectra of compound **1t**

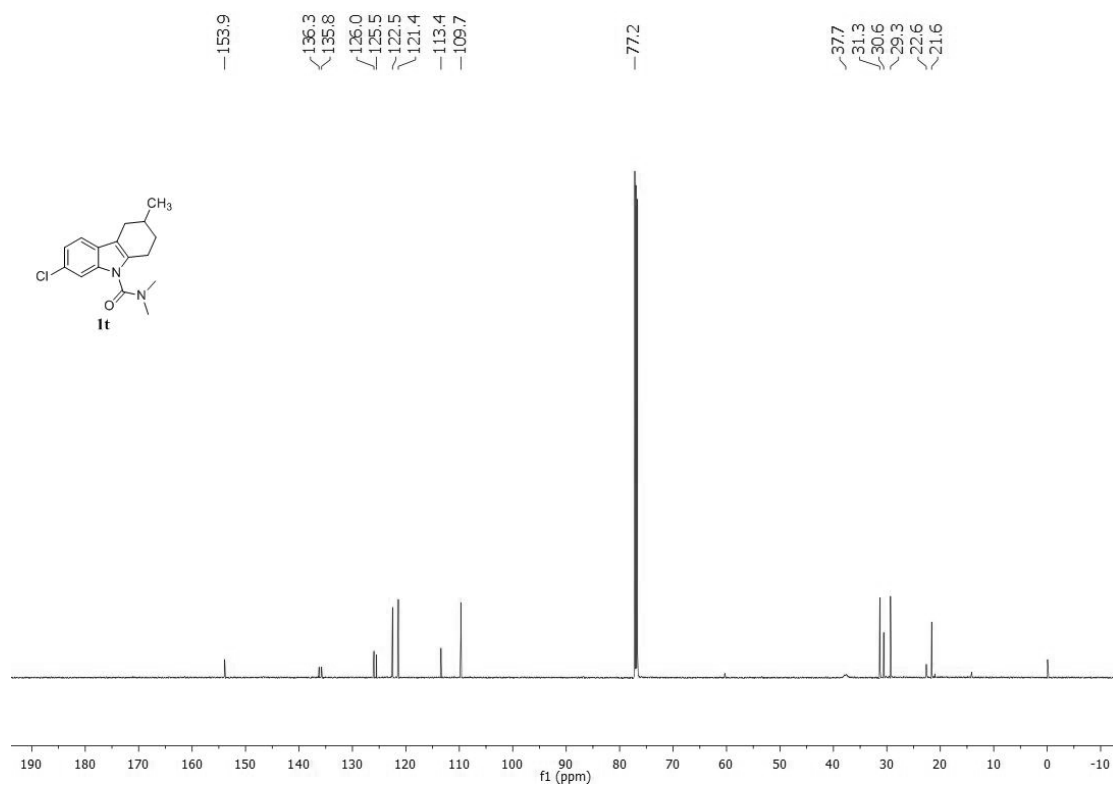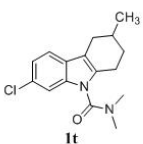

# HRMS spectrum of compound **1t**

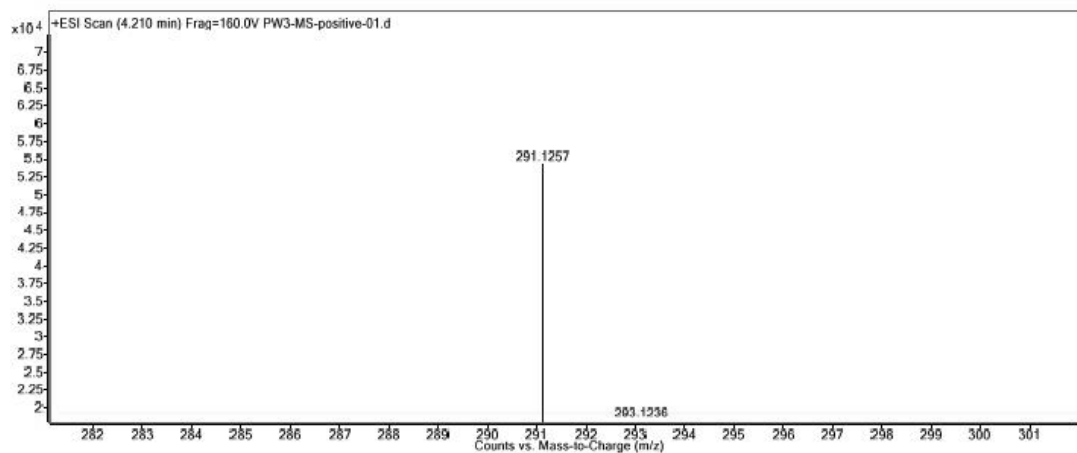

## Elemental Composition Calculator

|                                                    |                                        |                     |                  |                 |                    |
|----------------------------------------------------|----------------------------------------|---------------------|------------------|-----------------|--------------------|
| <b>Target m/z:</b>                                 | 291.1257                               | <b>Result type:</b> | Positive ions    | <b>Species:</b> | [M+H] <sup>+</sup> |
| <b>Elements:</b>                                   | C (0-80); H (0-120); O (0-30); N (0-5) |                     |                  |                 |                    |
| <b>Ion Formula</b>                                 | <b>Calculated m/z</b>                  |                     | <b>PPM Error</b> |                 |                    |
| C <sub>16</sub> H <sub>20</sub> CIN <sub>2</sub> O | 291.1259                               |                     | 0.55             |                 |                    |

### <sup>1</sup>H NMR spectra of compound **1v**

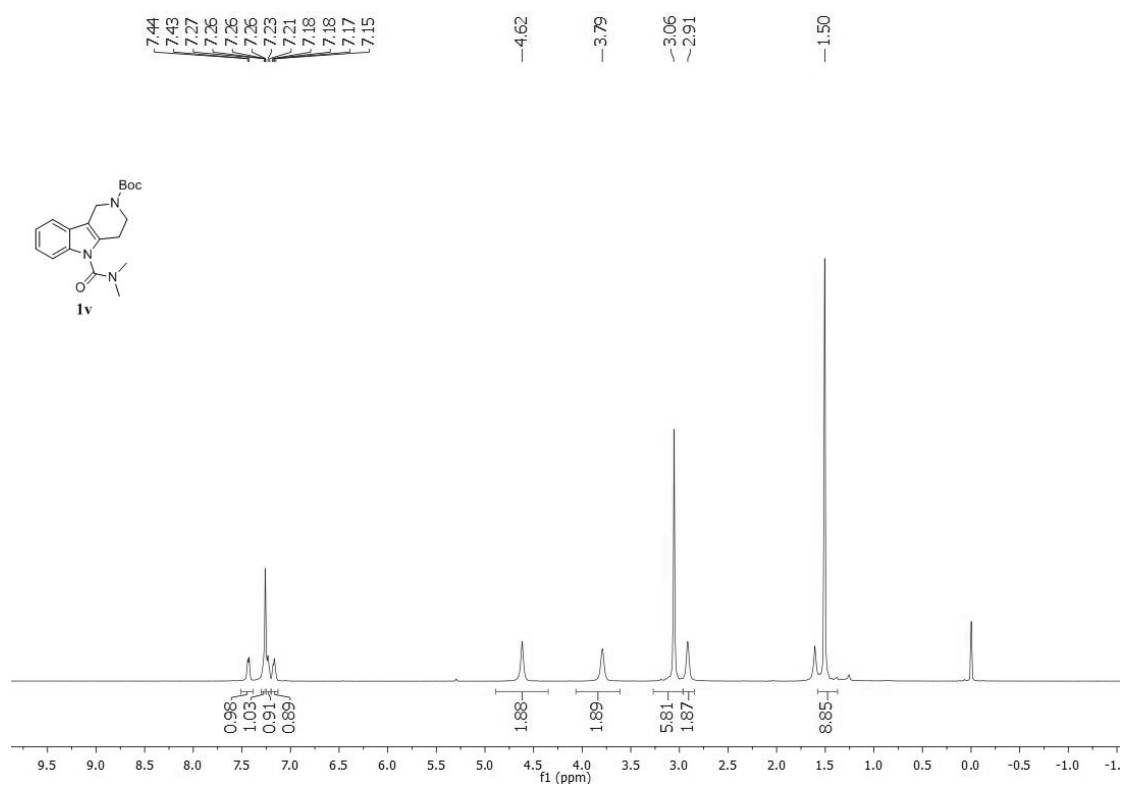

### <sup>13</sup>C NMR spectra of compound **1v**

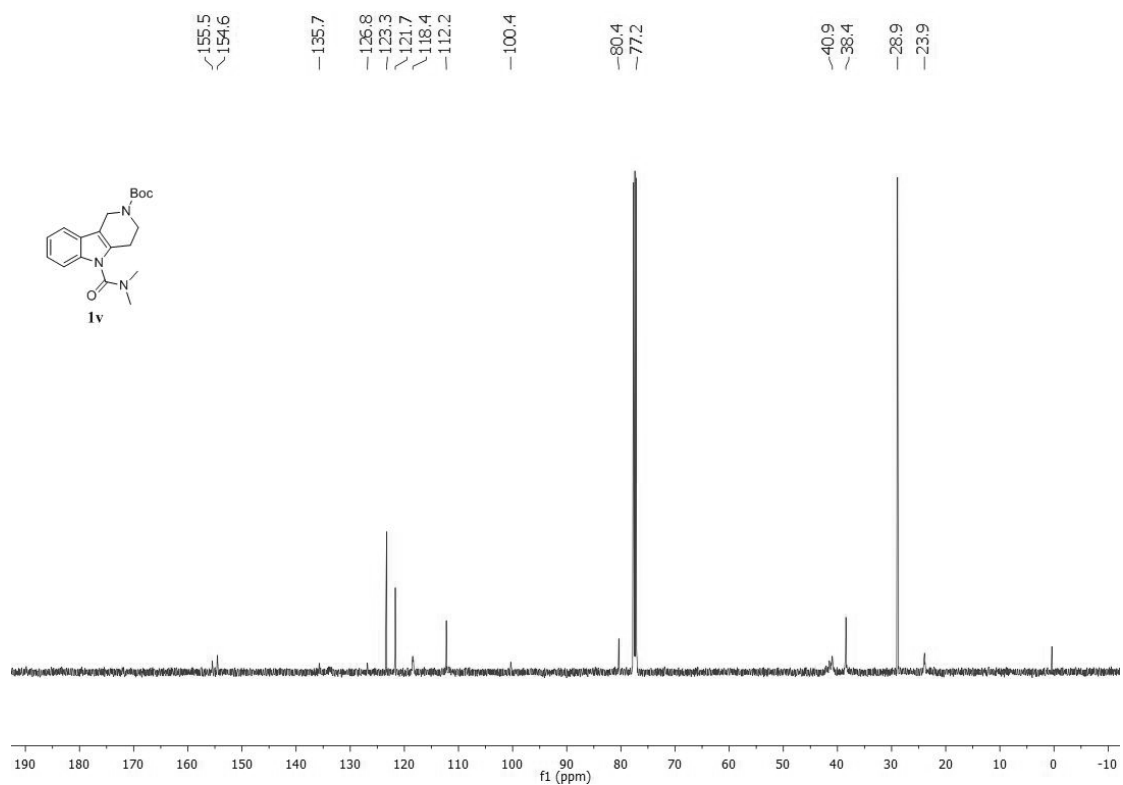

## HRMS spectrum of compound **1v**

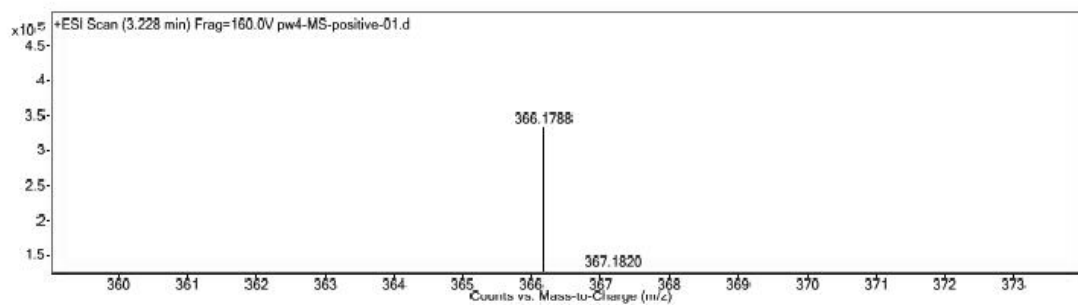

### Elemental Composition Calculator

|                                                                 |                                                 |                     |                  |                 |                     |
|-----------------------------------------------------------------|-------------------------------------------------|---------------------|------------------|-----------------|---------------------|
| <b>Target m/z:</b>                                              | 366.1788                                        | <b>Result type:</b> | Positive ions    | <b>Species:</b> | [M+Na] <sup>+</sup> |
| <b>Elements:</b>                                                | C (0-80); H (0-120); O (0-30); N(0-5); Na (0-5) |                     |                  |                 |                     |
| <b>Ion Formula</b>                                              | <b>Calculated m/z</b>                           |                     | <b>PPM Error</b> |                 |                     |
| C <sub>19</sub> H <sub>25</sub> N <sub>3</sub> NaO <sub>3</sub> | 366.1788                                        |                     | 0.03             |                 |                     |

### $^1\text{H}$ NMR spectra of compound **1x**

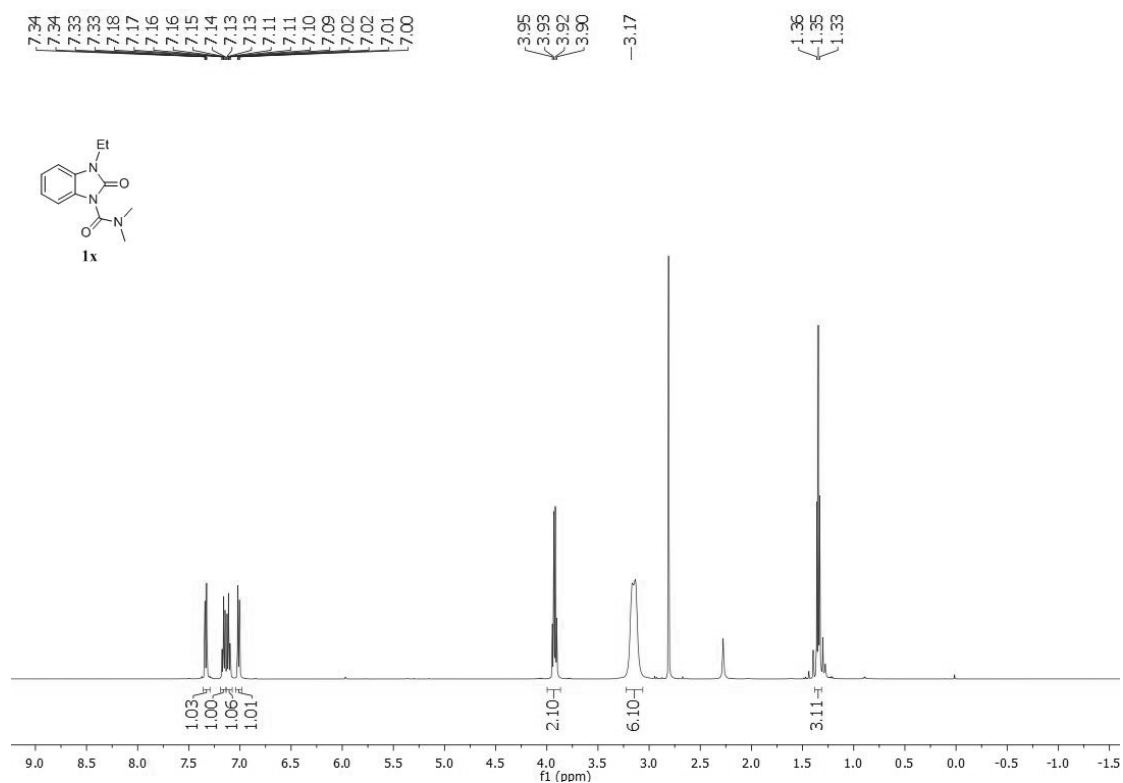

### $^{13}\text{C}$ NMR spectra of compound **1x**

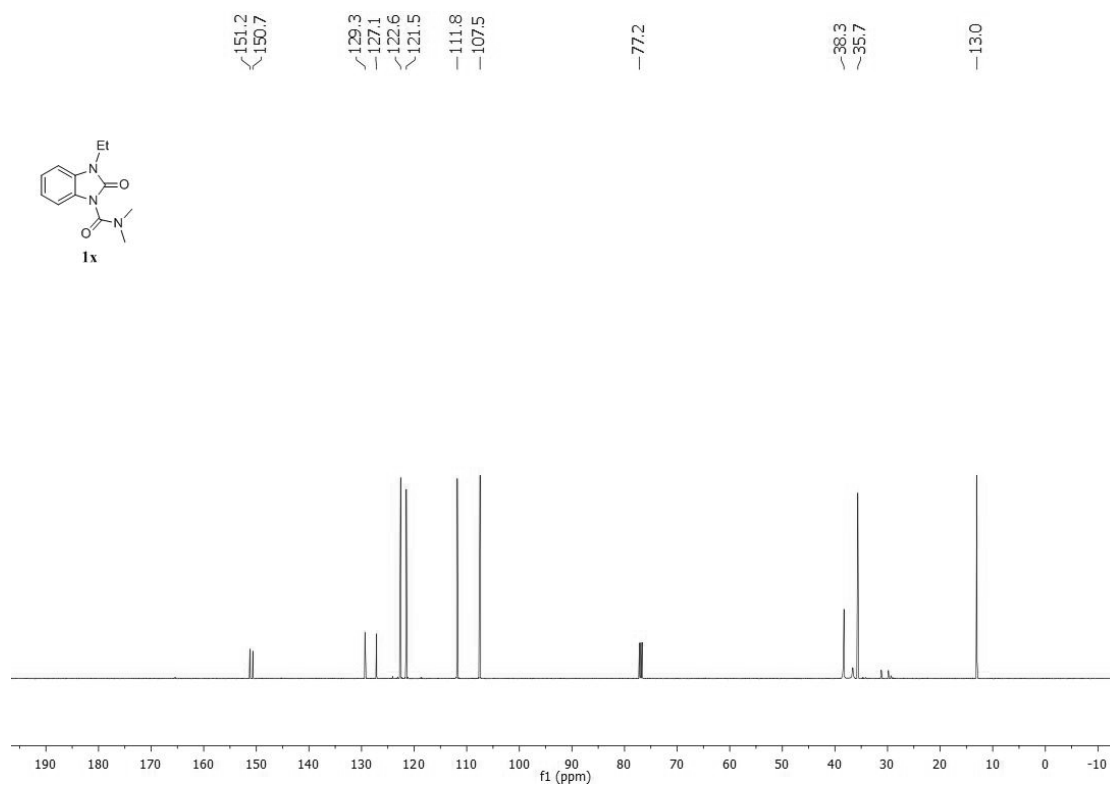

## HRMS spectrum of compound **1x**

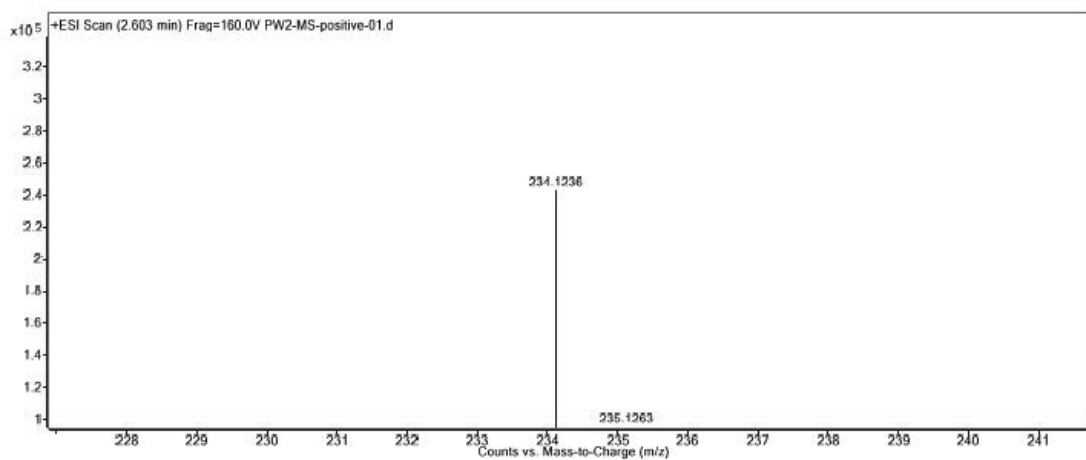

### Elemental Composition Calculator

|                                                               |                                        |                     |                  |                 |                    |
|---------------------------------------------------------------|----------------------------------------|---------------------|------------------|-----------------|--------------------|
| <b>Target <math>m/z</math>:</b>                               | 234.1236                               | <b>Result type:</b> | Positive ions    | <b>Species:</b> | [M+H] <sup>+</sup> |
| <b>Elements:</b>                                              | C (0-80); H (0-120); O (0-30); N (0-5) |                     |                  |                 |                    |
| <b>Ion Formula</b>                                            | <b>Calculated <math>m/z</math></b>     |                     | <b>PPM Error</b> |                 |                    |
| C <sub>12</sub> H <sub>16</sub> N <sub>3</sub> O <sub>2</sub> | 234.1237                               |                     | 0.45             |                 |                    |



### <sup>1</sup>H NMR spectra of compound 4

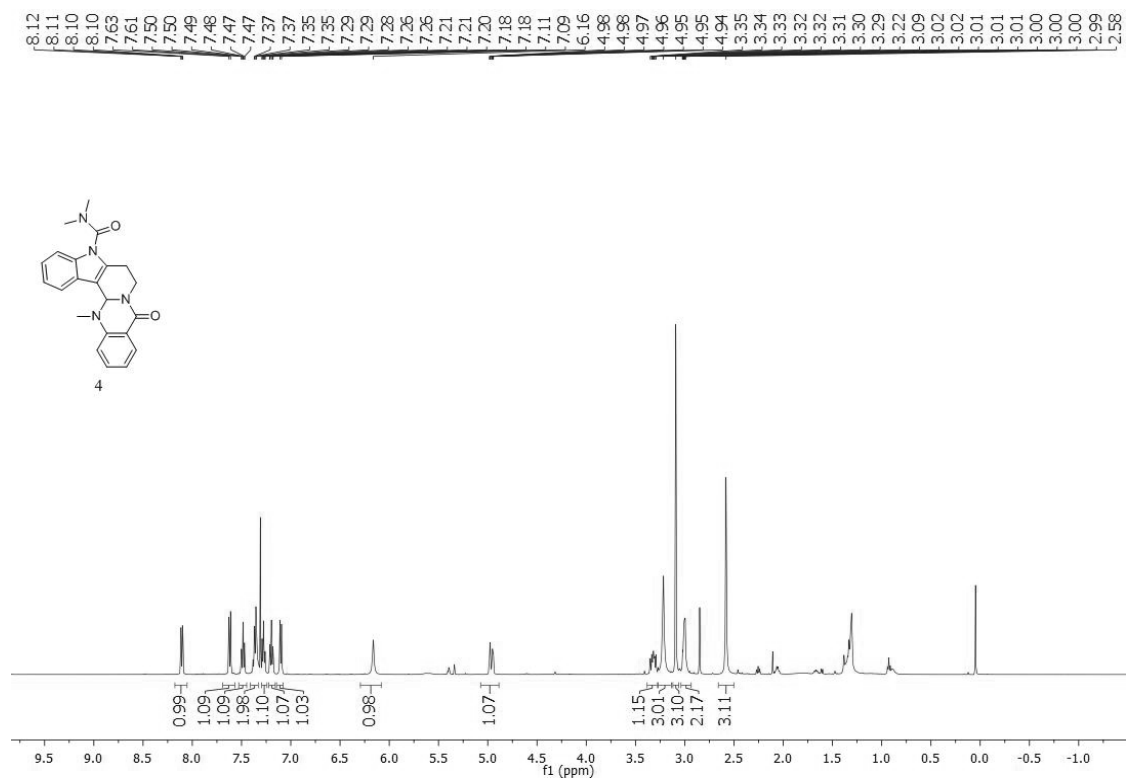

### <sup>13</sup>C NMR spectra of compound 4

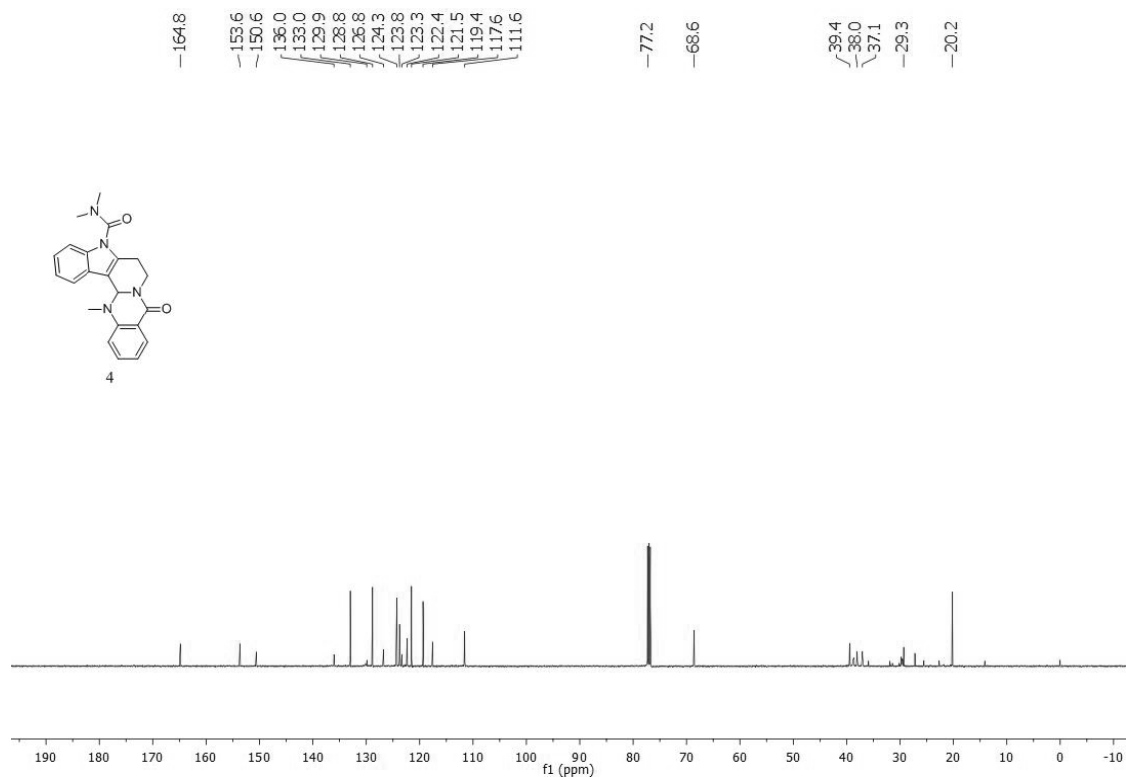

## HRMS spectrum of compound 4

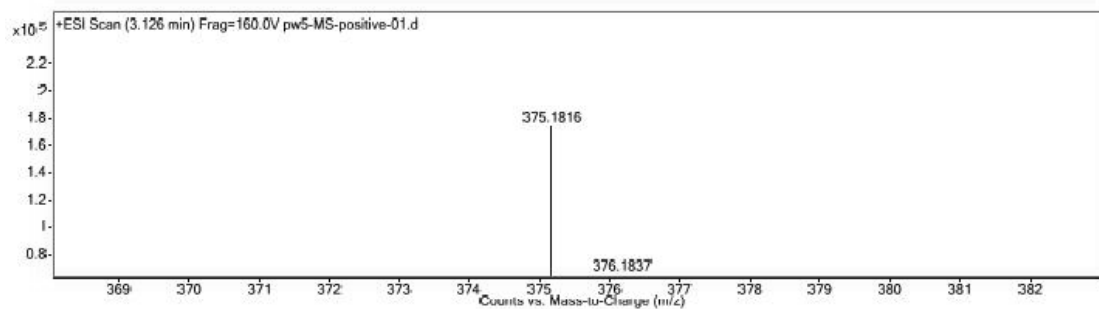

### Elemental Composition Calculator

|                                                               |                                       |                     |                  |                 |                    |
|---------------------------------------------------------------|---------------------------------------|---------------------|------------------|-----------------|--------------------|
| <b>Target m/z:</b>                                            | 375.1816                              | <b>Result type:</b> | Positive ions    | <b>Species:</b> | [M+H] <sup>+</sup> |
| <b>Elements:</b>                                              | C (0-80); H (0-120); O (0-30); N(0-5) |                     |                  |                 |                    |
| <b>Ion Formula</b>                                            | <b>Calculated m/z</b>                 |                     | <b>PPM Error</b> |                 |                    |
| C <sub>22</sub> H <sub>23</sub> N <sub>4</sub> O <sub>2</sub> | 375.1816                              |                     | -0.23            |                 |                    |

### $^1\text{H}$ NMR spectra of compound **3a**

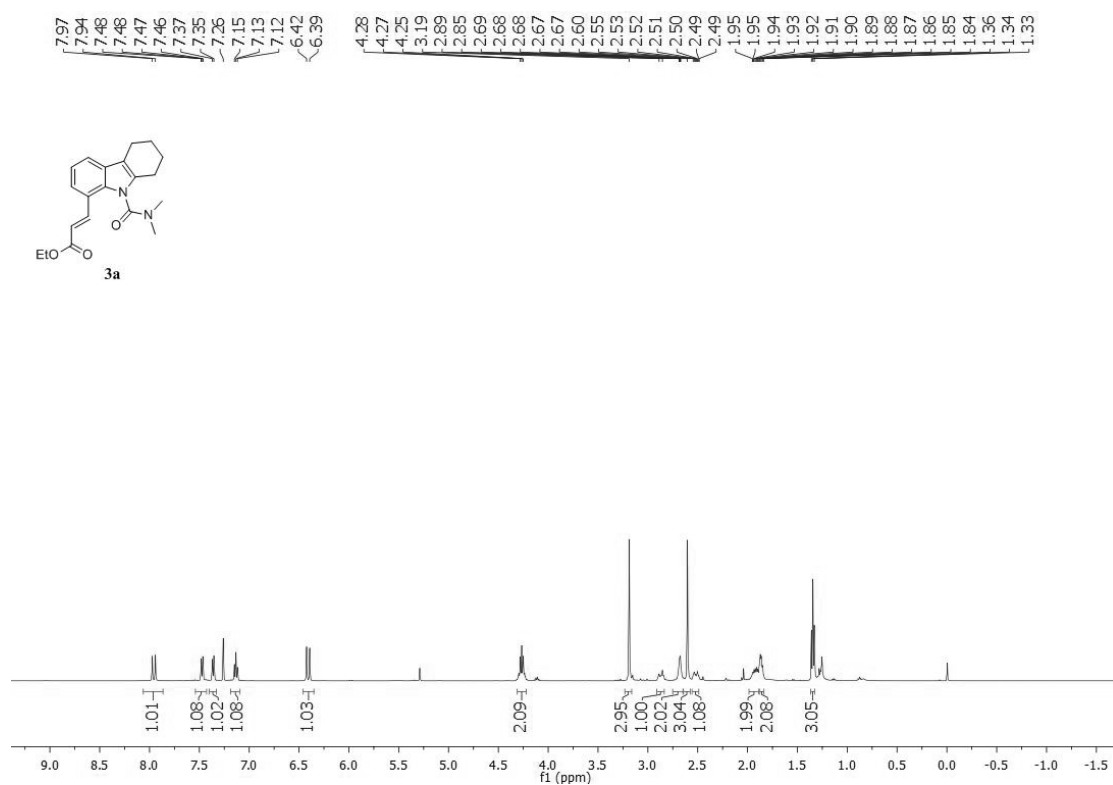

### $^{13}\text{C}$ NMR spectra of compound **3a**

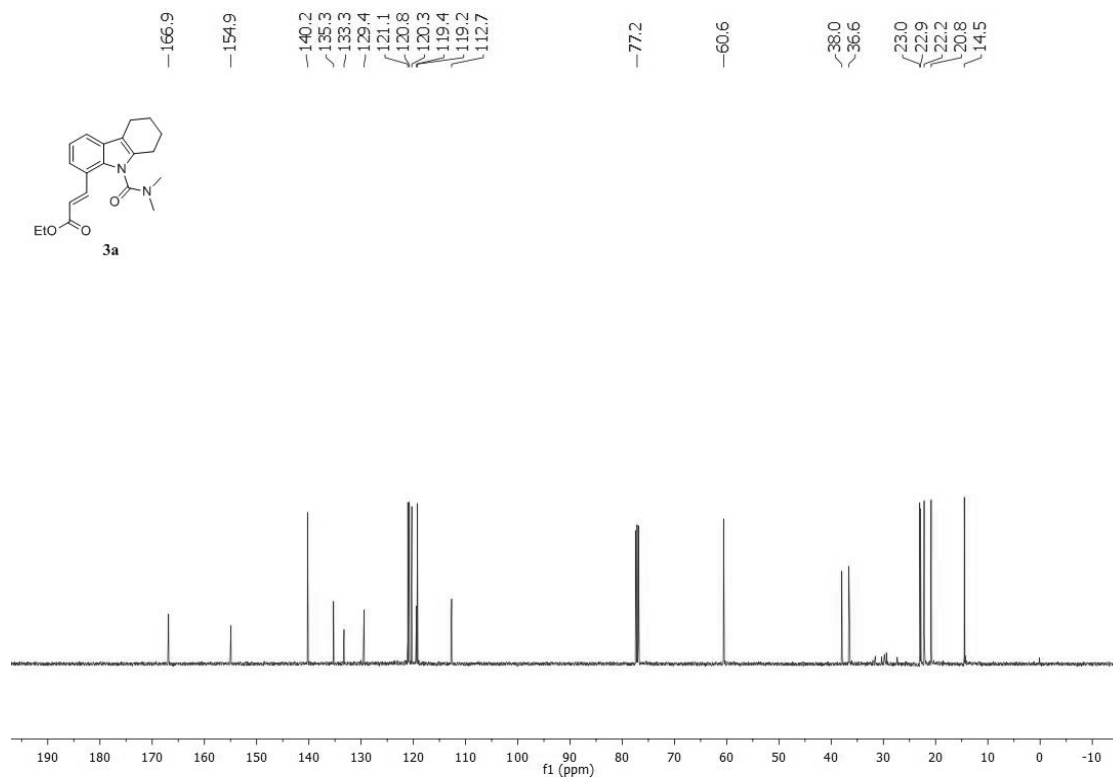

## HRMS spectrum of compound **3a**

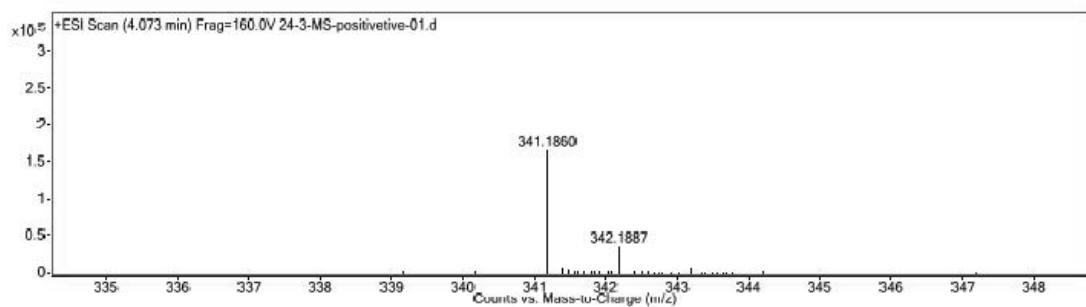

### Elemental Composition Calculator

|                                                               |                                       |                     |                  |                 |                    |
|---------------------------------------------------------------|---------------------------------------|---------------------|------------------|-----------------|--------------------|
| <b>Target m/z:</b>                                            | 341.1860                              | <b>Result type:</b> | Positive ions    | <b>Species:</b> | [M+H] <sup>+</sup> |
| <b>Elements:</b>                                              | C (0-80); H (0-120); O (0-30); N(0-5) |                     |                  |                 |                    |
| <b>Ion Formula</b>                                            | <b>Calculated m/z</b>                 |                     | <b>PPM Error</b> |                 |                    |
| C <sub>20</sub> H <sub>25</sub> N <sub>2</sub> O <sub>3</sub> | 341.1860                              |                     | -0.09            |                 |                    |

### <sup>1</sup>H NMR spectra of compound **3b**

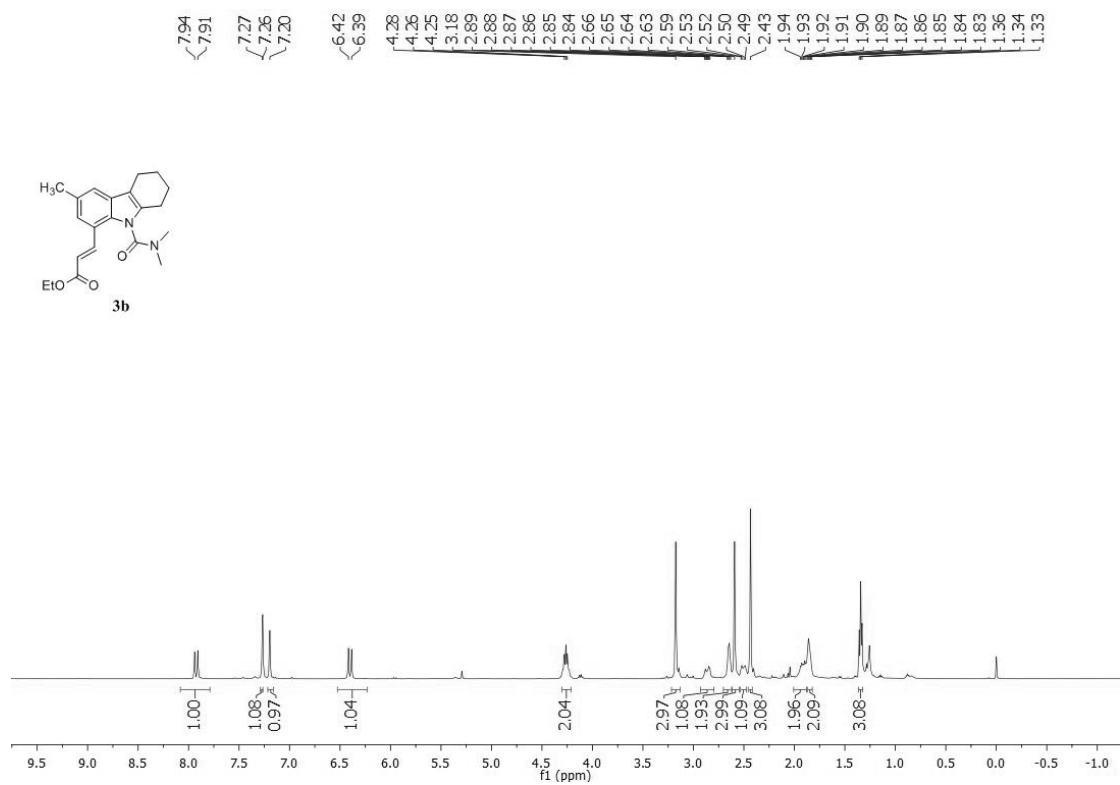

### <sup>13</sup>C NMR spectra of compound **3b**

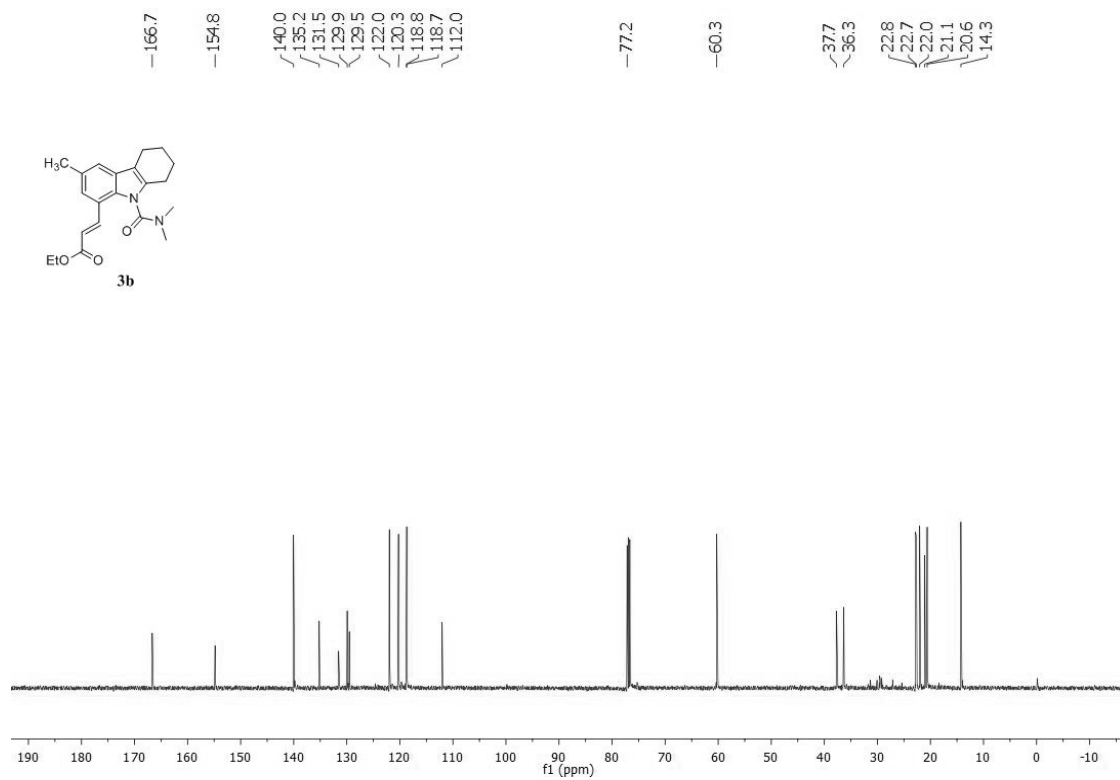

## HRMS spectrum of compound **3b**

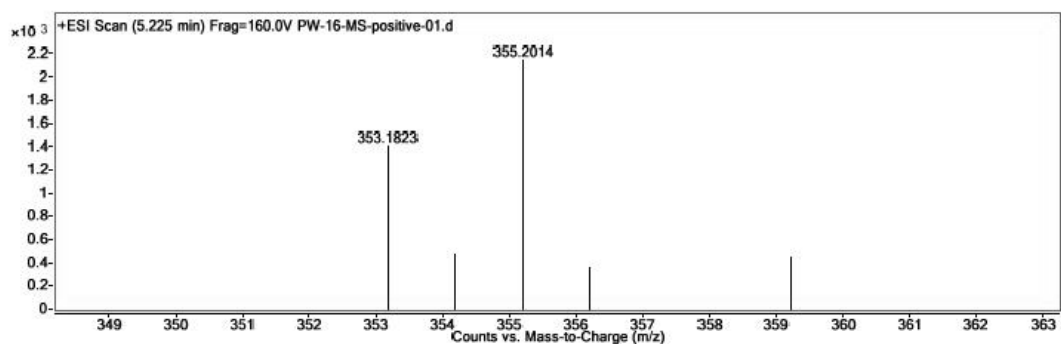

### Elemental Composition Calculator

|                                                               |                                       |                     |                  |                 |                    |
|---------------------------------------------------------------|---------------------------------------|---------------------|------------------|-----------------|--------------------|
| <b>Target m/z:</b>                                            | 355.2014                              | <b>Result type:</b> | Positive ions    | <b>Species:</b> | [M+H] <sup>+</sup> |
| <b>Elements:</b>                                              | C (0-80); H (0-120); O (0-30); N(0-5) |                     |                  |                 |                    |
| <b>Ion Formula</b>                                            | <b>Calculated m/z</b>                 |                     | <b>PPM Error</b> |                 |                    |
| C <sub>21</sub> H <sub>27</sub> N <sub>2</sub> O <sub>3</sub> | 355.2016                              |                     | 0.71             |                 |                    |

<sup>1</sup>H NMR spectra of compound **3c**

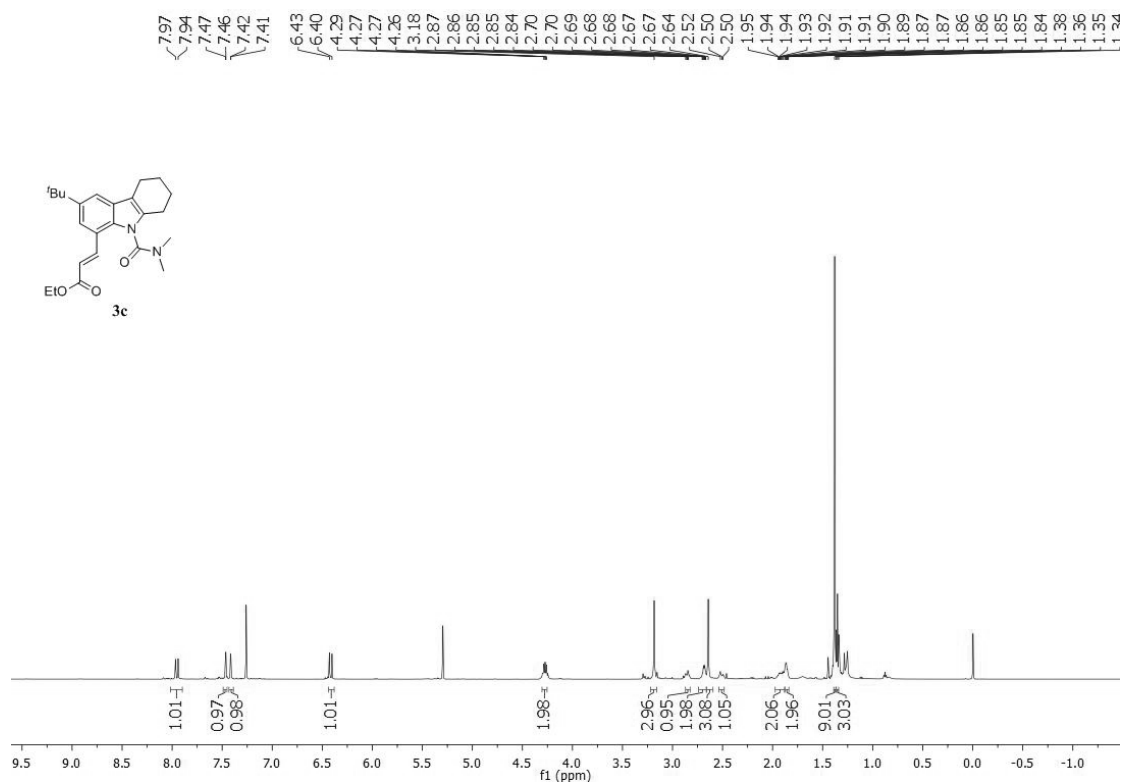

<sup>13</sup>C NMR spectra of compound **3c**

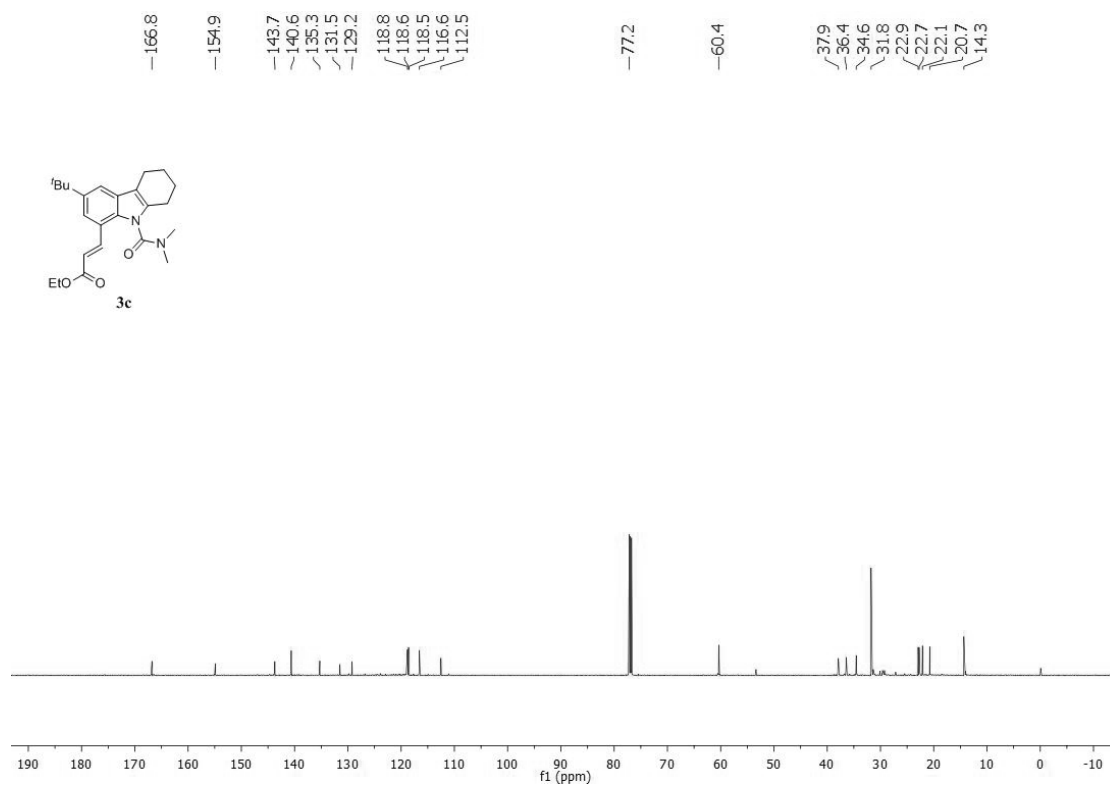

## HRMS spectrum of compound **3c**

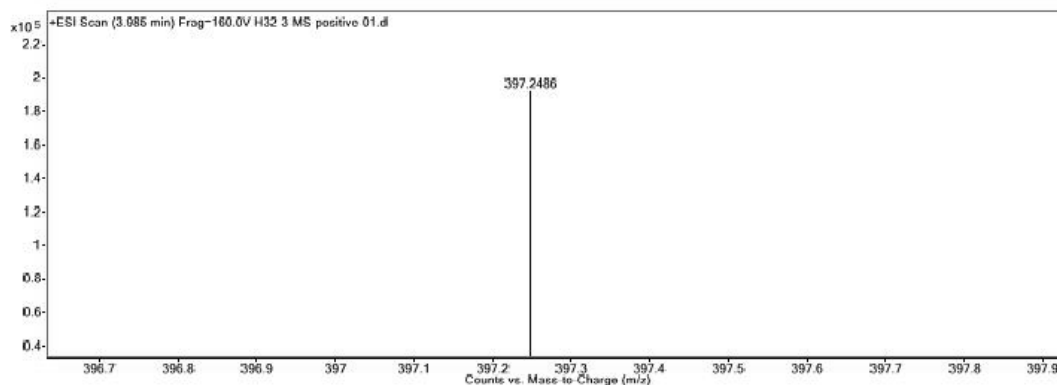

### Elemental Composition Calculator

|                                                               |                                       |                     |                  |                 |           |
|---------------------------------------------------------------|---------------------------------------|---------------------|------------------|-----------------|-----------|
| <b>Target <math>m/z</math>:</b>                               | 397.2486                              | <b>Result type:</b> | Positive ions    | <b>Species:</b> | $[M+H]^+$ |
| <b>Elements:</b>                                              | C (0-80); H (0-120); O (0-30); N(0-5) |                     |                  |                 |           |
| <b>Ion Formula</b>                                            | <b>Calculated <math>m/z</math></b>    |                     | <b>PPM Error</b> |                 |           |
| C <sub>24</sub> H <sub>33</sub> N <sub>2</sub> O <sub>3</sub> | 397.2486                              |                     | 0.02             |                 |           |



### $^1\text{H}$ NMR spectra of compound **3d**

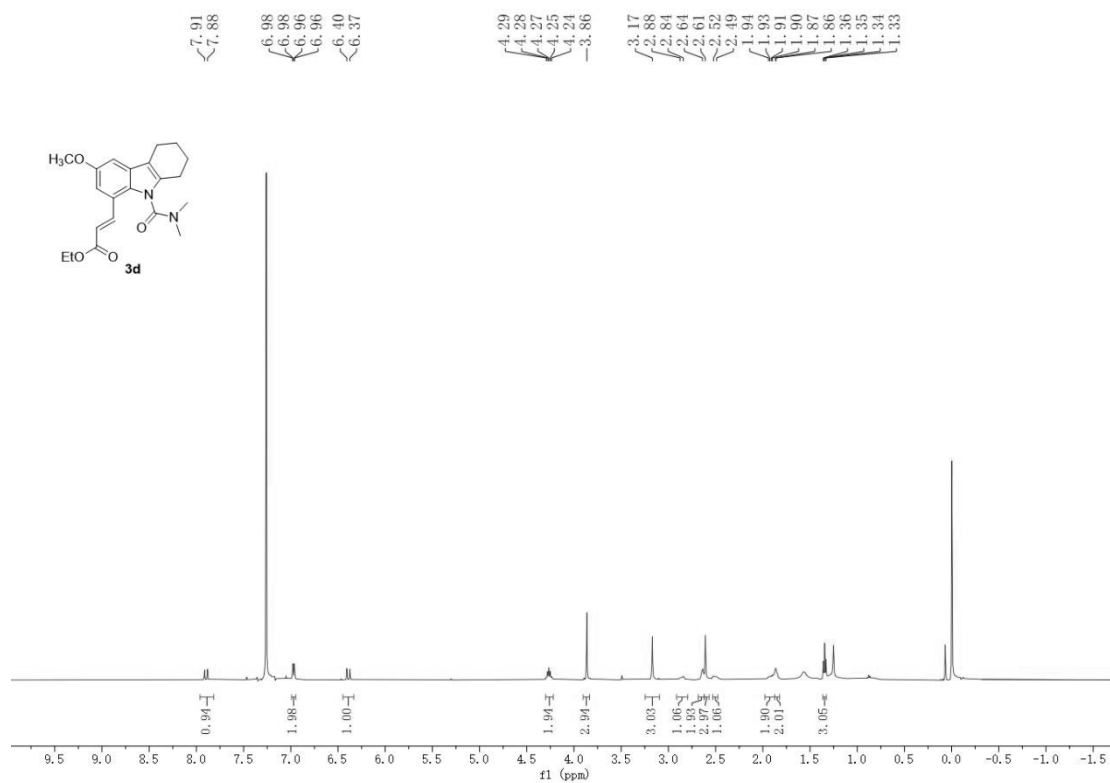

### $^{13}\text{C}$ NMR spectra of compound **3d**

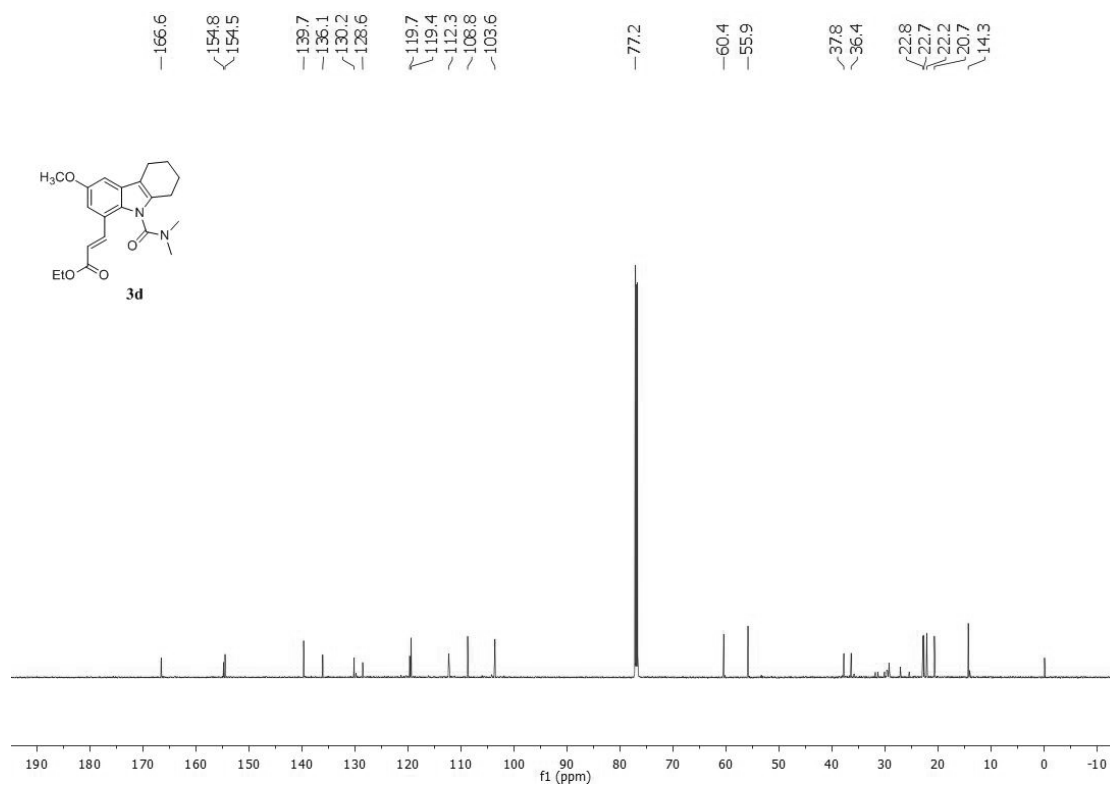

## HRMS spectrum of compound **3d**

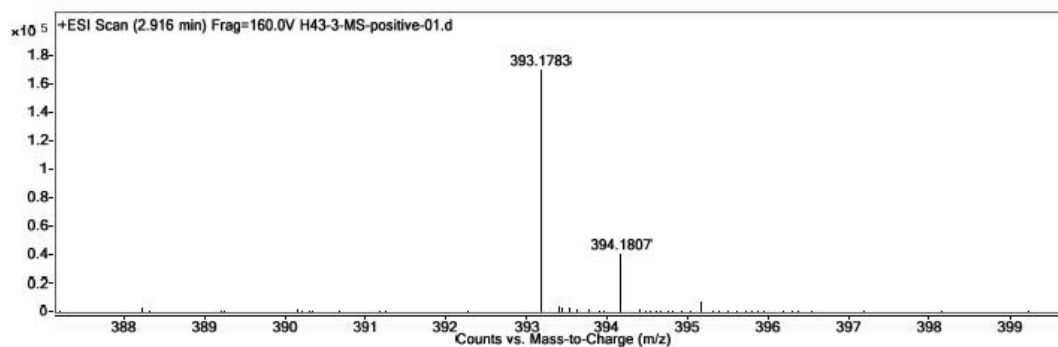

### Elemental Composition Calculator

|                                                                 |                                                 |                     |                  |                 |                     |
|-----------------------------------------------------------------|-------------------------------------------------|---------------------|------------------|-----------------|---------------------|
| <b>Target m/z:</b>                                              | 393.1783                                        | <b>Result type:</b> | Positive ions    | <b>Species:</b> | [M+Na] <sup>+</sup> |
| <b>Elements:</b>                                                | C (0-80); H (0-120); O (0-30); N(0-5); Na (0-5) |                     |                  |                 |                     |
| <b>Ion Formula</b>                                              | <b>Calculated m/z</b>                           |                     | <b>PPM Error</b> |                 |                     |
| C <sub>21</sub> H <sub>26</sub> N <sub>2</sub> NaO <sub>4</sub> | 393.1785                                        |                     | 0.46             |                 |                     |

### <sup>1</sup>H NMR spectra of compound **3e**

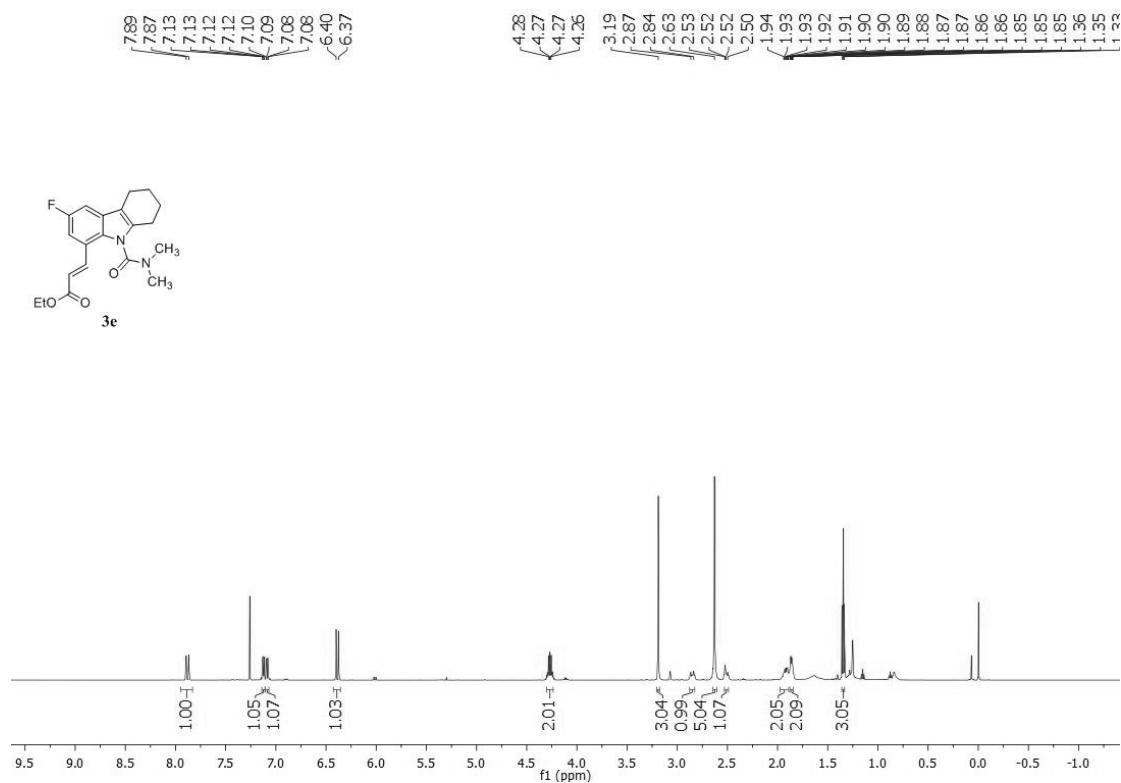

### <sup>13</sup>C NMR spectra of compound **3e**

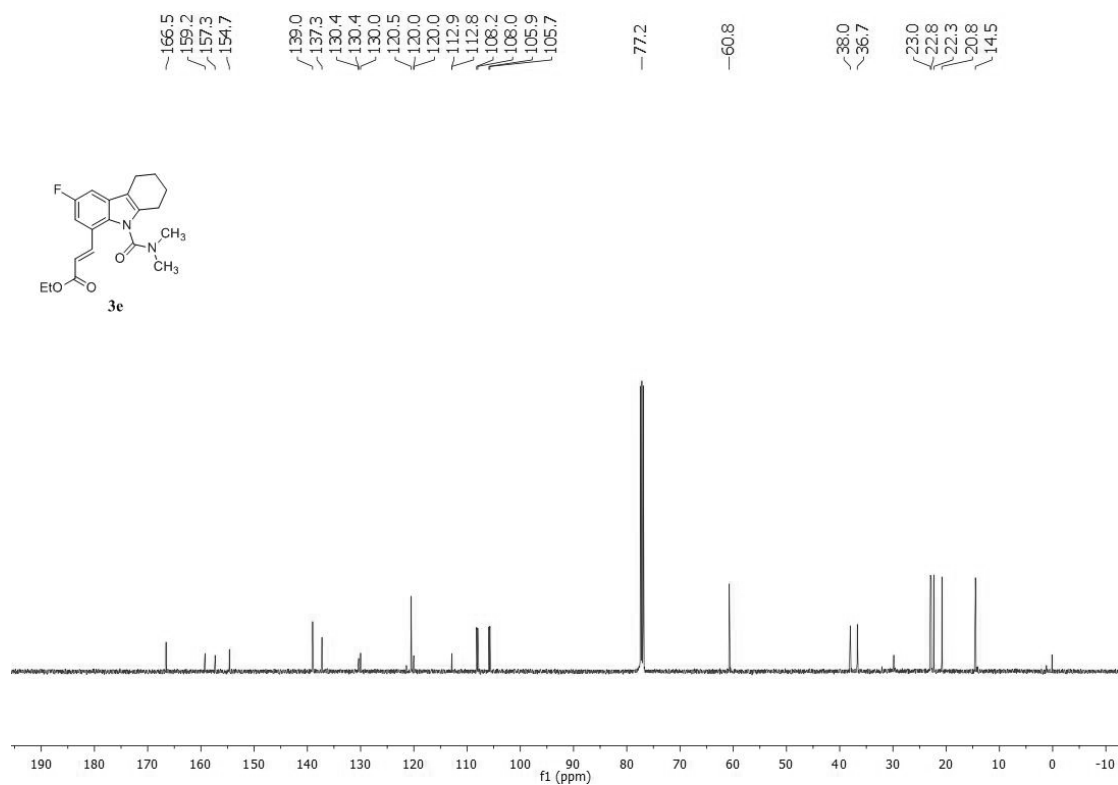

<sup>19</sup>F NMR spectra of compound **3e**

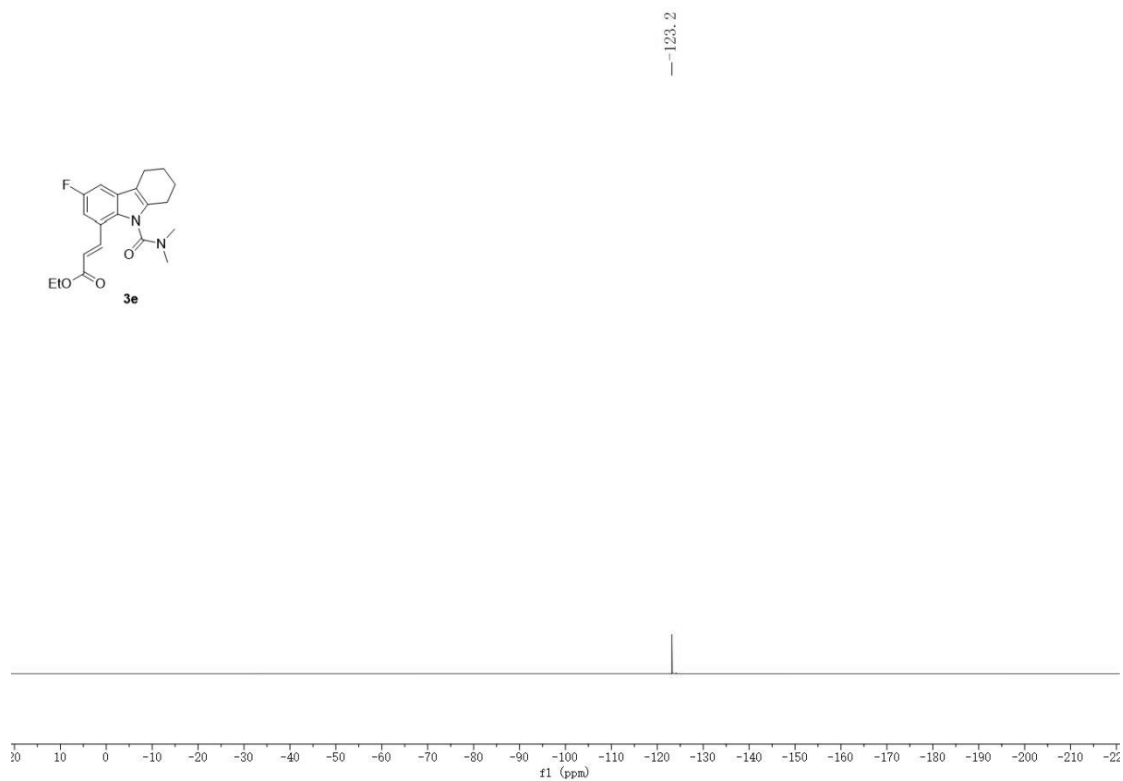

HRMS spectrum of compound **3e**

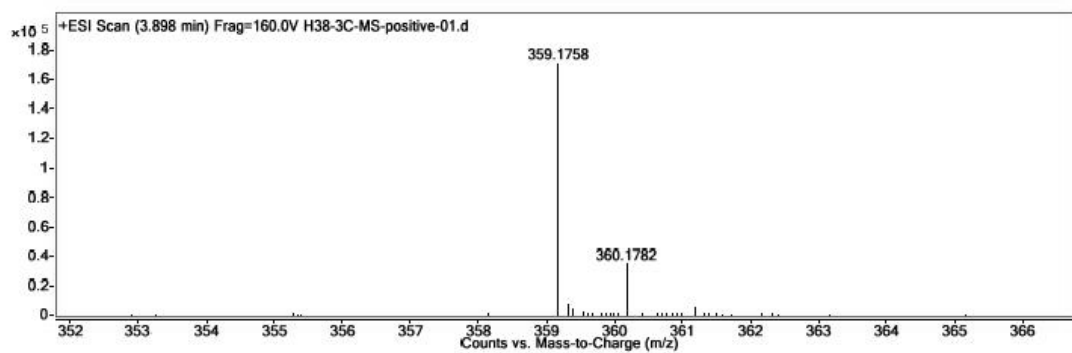

Elemental Composition Calculator

|                                                                |                                               |              |               |          |                    |
|----------------------------------------------------------------|-----------------------------------------------|--------------|---------------|----------|--------------------|
| Target m/z:                                                    | 359.1758                                      | Result type: | Positive ions | Species: | [M+H] <sup>+</sup> |
| Elements:                                                      | C (0-80); H (0-120); O (0-30); N(0-5); F(0-5) |              |               |          |                    |
| Ion Formula                                                    | Calculated m/z                                | PPM Error    |               |          |                    |
| C <sub>20</sub> H <sub>24</sub> FN <sub>2</sub> O <sub>3</sub> | 359.1765                                      | 2.01         |               |          |                    |

### $^1\text{H}$ NMR spectra of compound **3f**

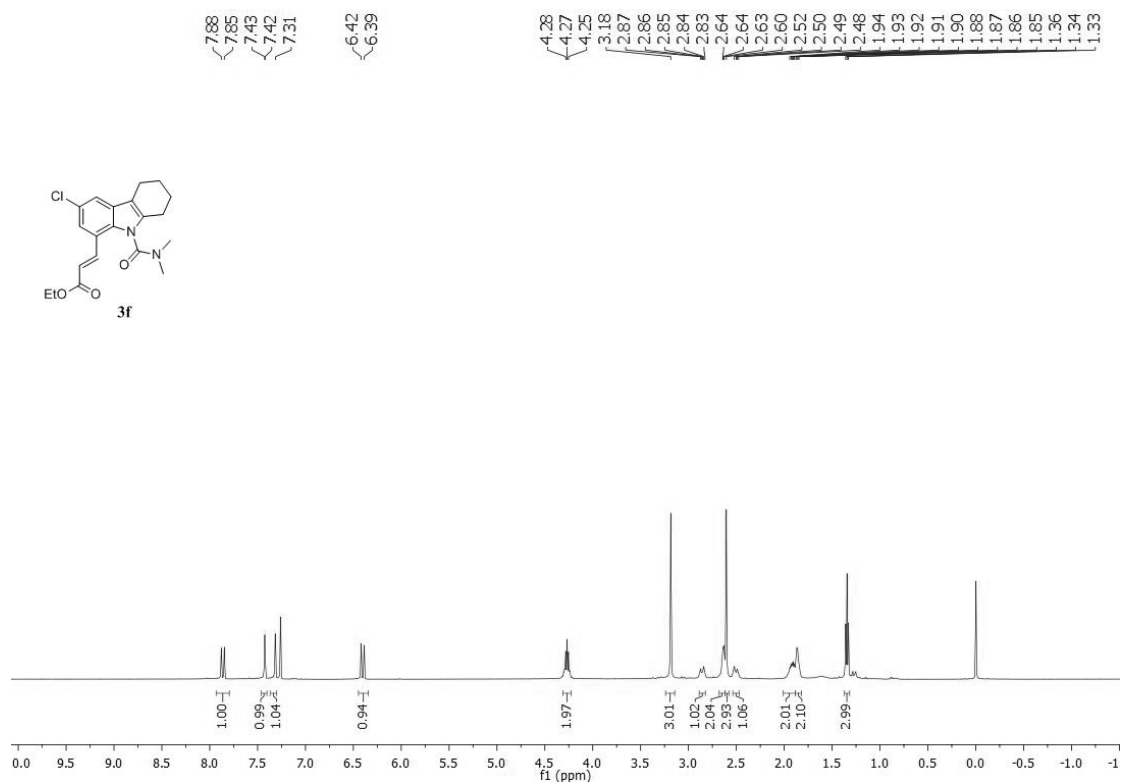

### $^{13}\text{C}$ NMR spectra of compound **3f**

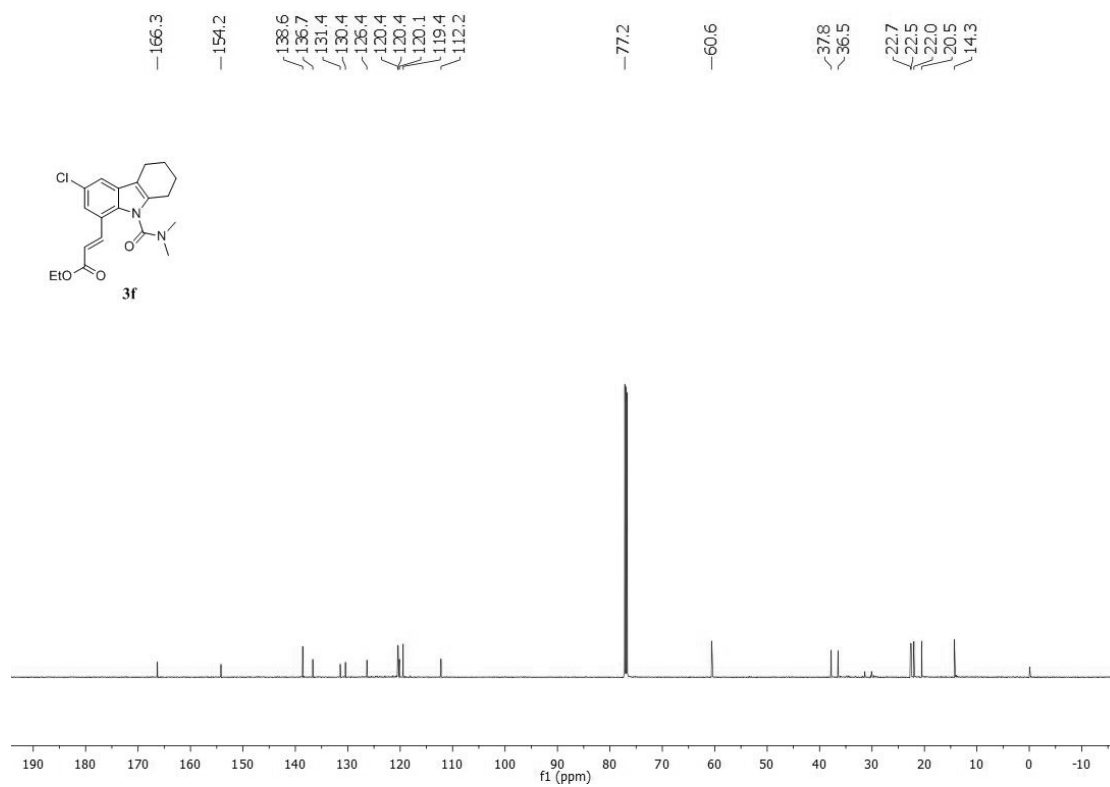

### HRMS spectrum of compound **3f**

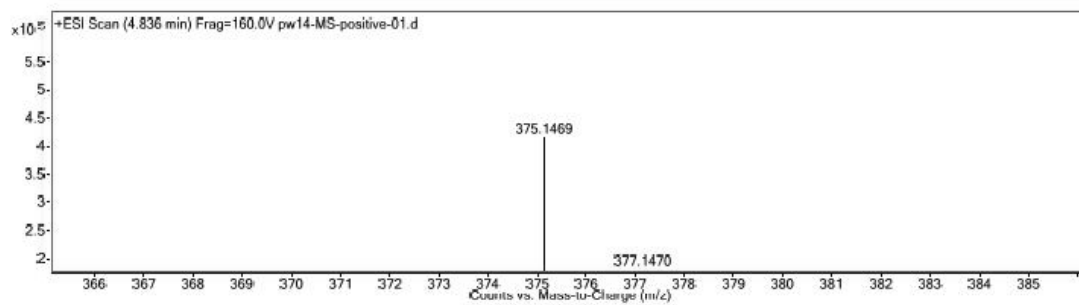

### Elemental Composition Calculator

|                                                                 |                                                  |                     |                  |                 |                    |
|-----------------------------------------------------------------|--------------------------------------------------|---------------------|------------------|-----------------|--------------------|
| <b>Target m/z:</b>                                              | 375.1469                                         | <b>Result type:</b> | Positive ions    | <b>Species:</b> | [M+H] <sup>+</sup> |
| <b>Elements:</b>                                                | C (0-80); H (0-120); O (0-30) ; N(0-5) ; Cl(0-5) |                     |                  |                 |                    |
| <b>Ion Formula</b>                                              | <b>Calculated m/z</b>                            |                     | <b>PPM Error</b> |                 |                    |
| C <sub>20</sub> H <sub>24</sub> ClN <sub>2</sub> O <sub>3</sub> | 375.1470                                         |                     | 0.13             |                 |                    |

### $^1\text{H}$ NMR spectra of compound **3g**

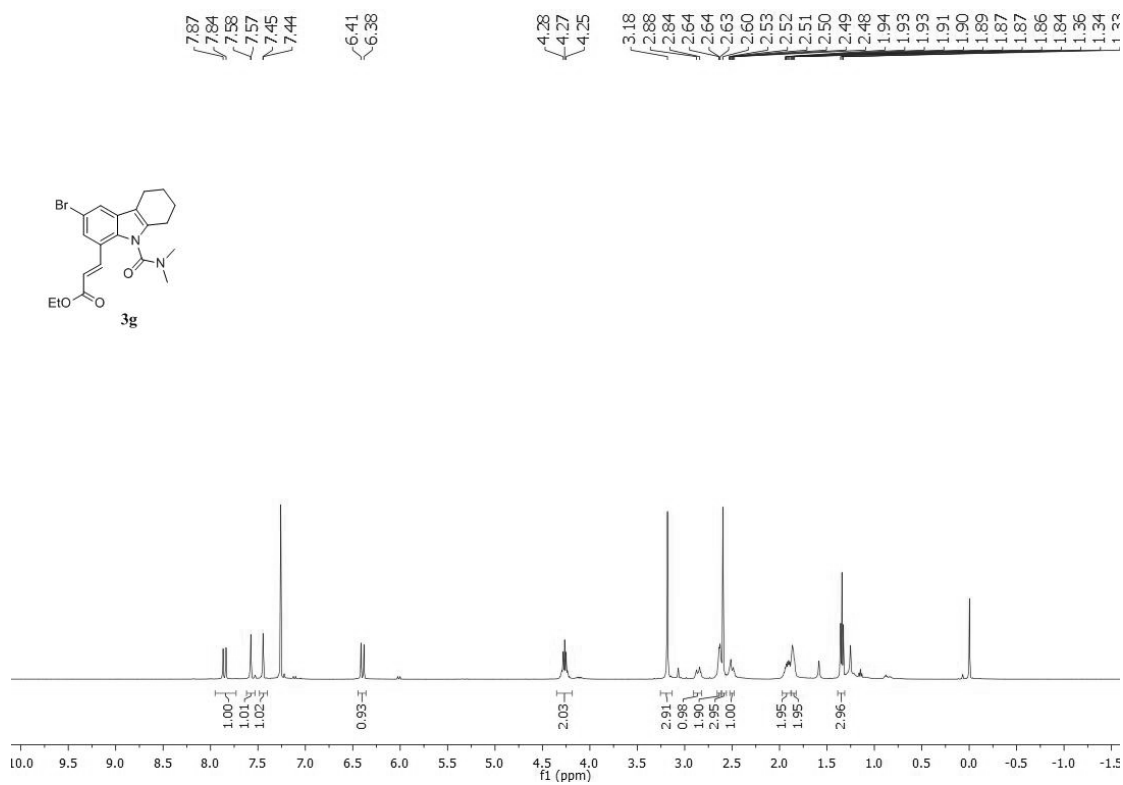

### $^{13}\text{C}$ NMR spectra of compound **3g**

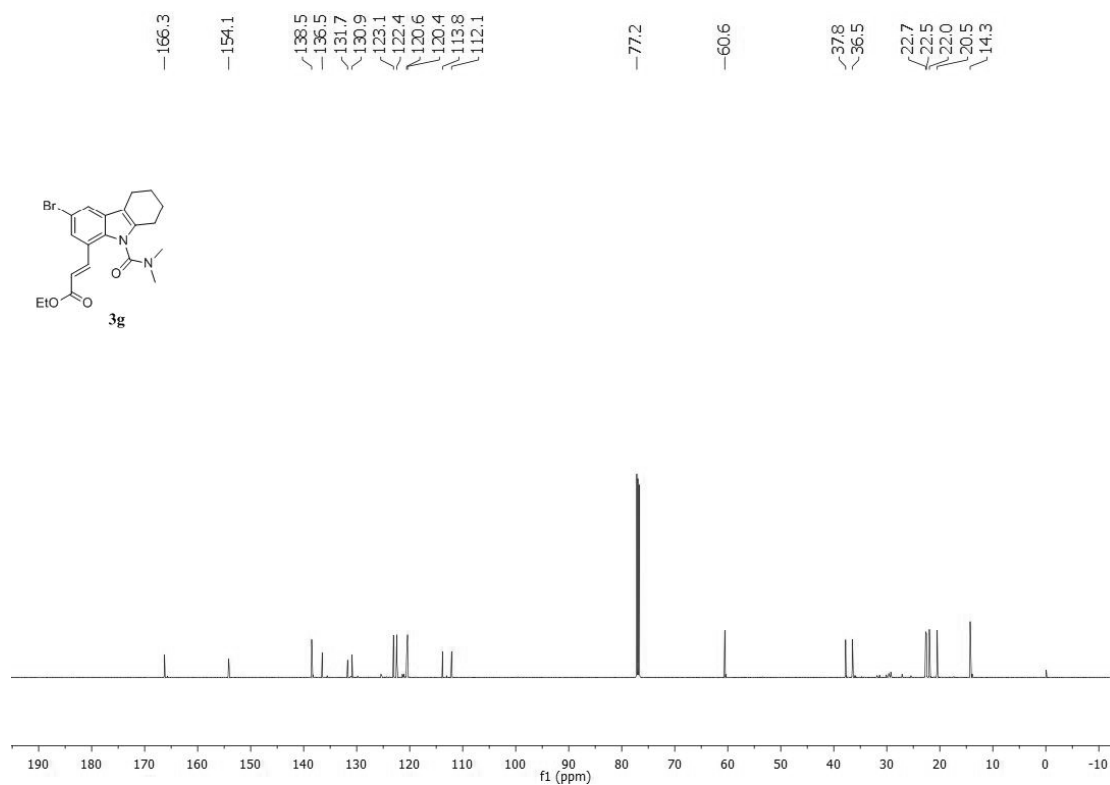

## HRMS spectrum of compound **3g**

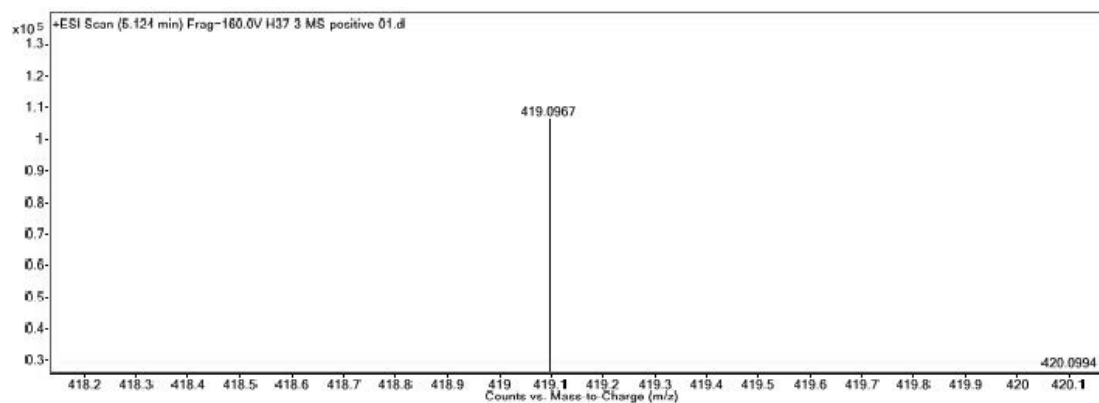

### Elemental Composition Calculator

|                                                                 |                                                 |                     |                  |                 |                    |
|-----------------------------------------------------------------|-------------------------------------------------|---------------------|------------------|-----------------|--------------------|
| <b>Target m/z:</b>                                              | 419.0967                                        | <b>Result type:</b> | Positive ions    | <b>Species:</b> | [M+H] <sup>+</sup> |
| <b>Elements:</b>                                                | C (0-80); H (0-120); O (0-30) ; N(0-5) ;Br(0-5) |                     |                  |                 |                    |
| <b>Ion Formula</b>                                              | <b>Calculated m/z</b>                           |                     | <b>PPM Error</b> |                 |                    |
| C <sub>20</sub> H <sub>24</sub> BrN <sub>2</sub> O <sub>3</sub> | 419.0965                                        |                     | -0.53            |                 |                    |



### $^1\text{H}$ NMR spectra of compound **3h**

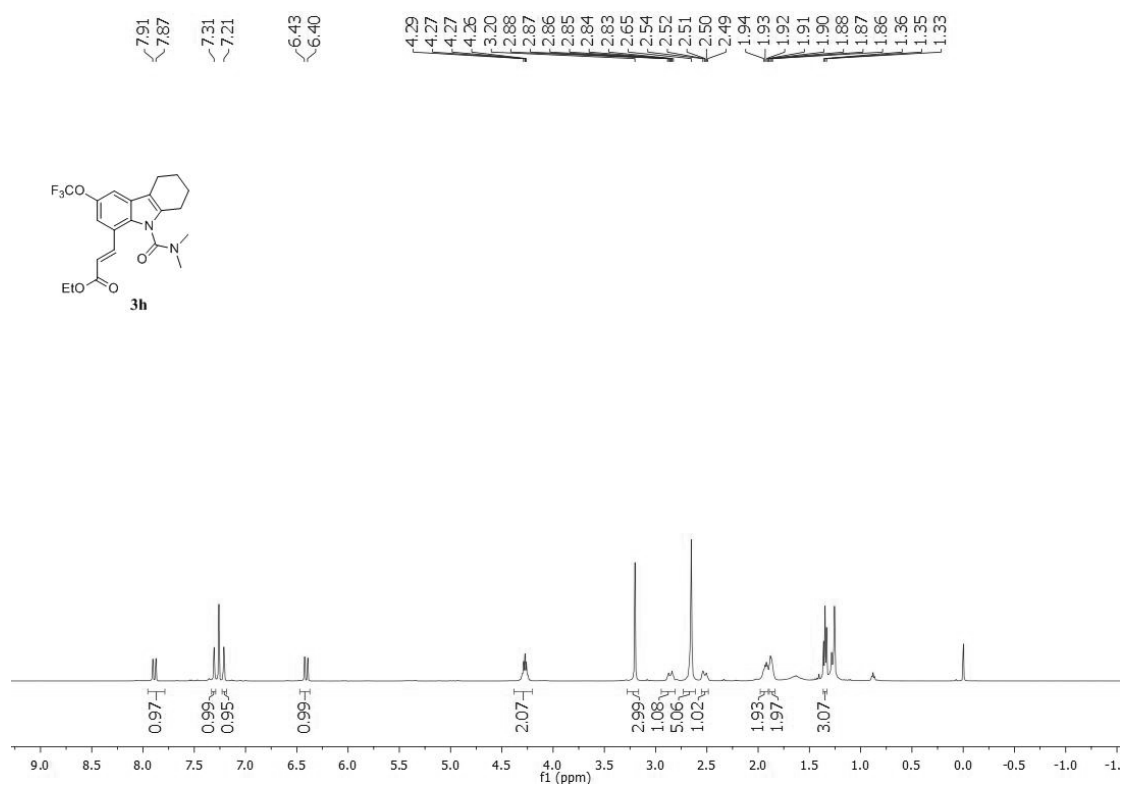

### $^{13}\text{C}$ NMR spectra of compound **3h**

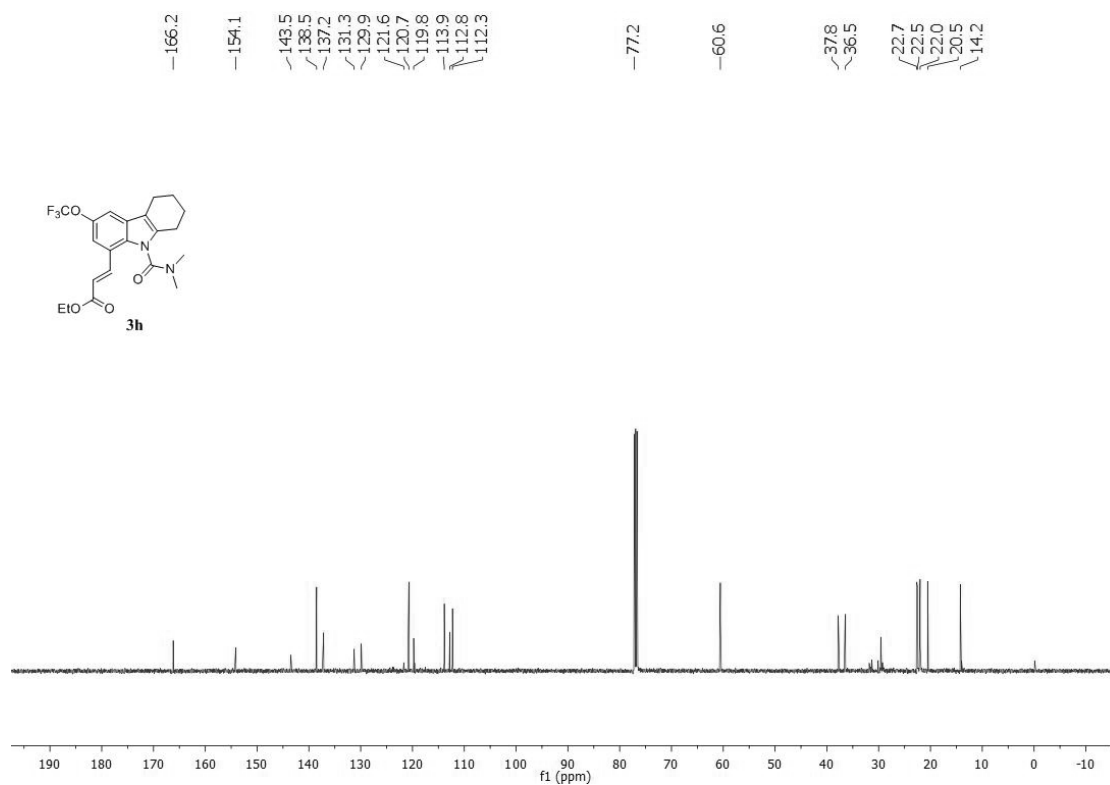

## <sup>19</sup>F NMR spectra of compound **3h**

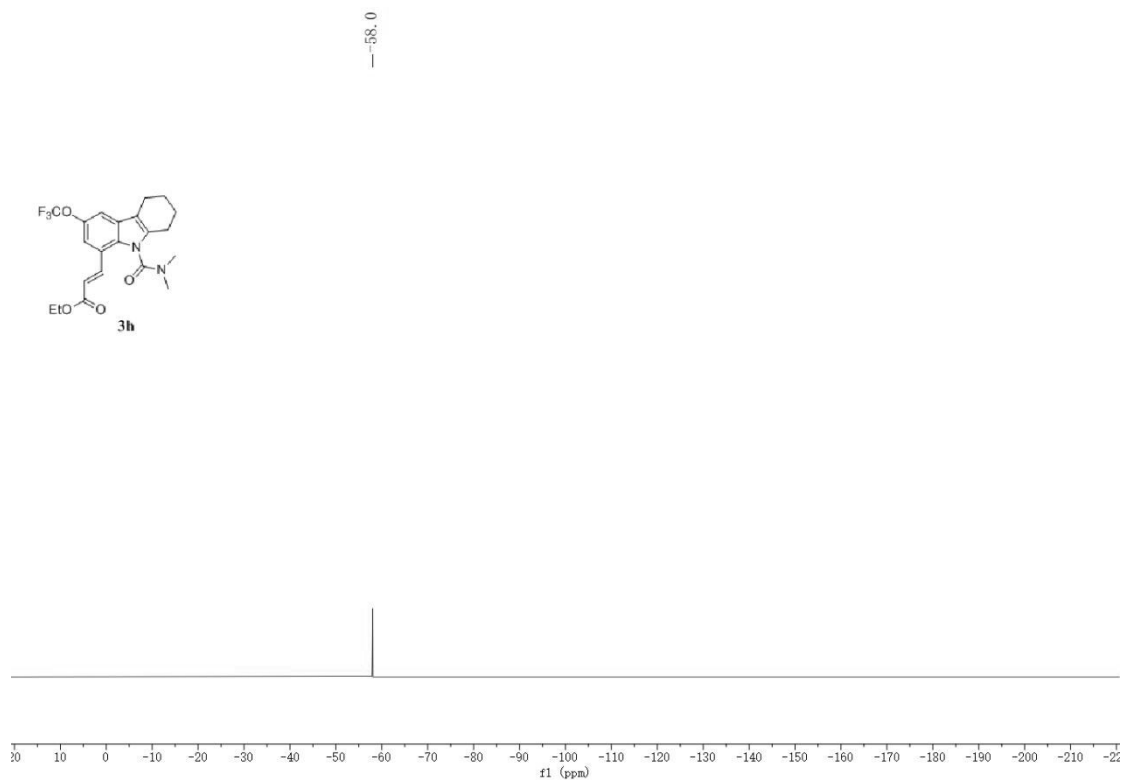

## HRMS spectrum of compound **3h**

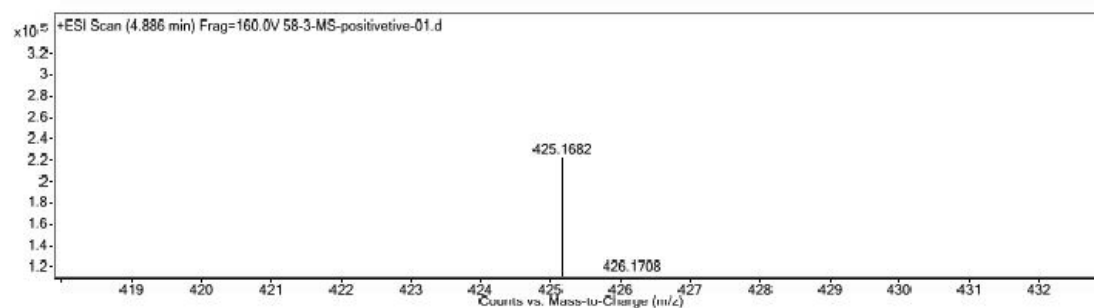

### Elemental Composition Calculator

|                                                                              |                                               |                     |                  |                 |                    |
|------------------------------------------------------------------------------|-----------------------------------------------|---------------------|------------------|-----------------|--------------------|
| <b>Target m/z:</b>                                                           | 425.1682                                      | <b>Result type:</b> | Positive ions    | <b>Species:</b> | [M+H] <sup>+</sup> |
| <b>Elements:</b>                                                             | C (0-80); H (0-120); O (0-30); N(0-5); F(0-5) |                     |                  |                 |                    |
| <b>Ion Formula</b>                                                           | <b>Calculated m/z</b>                         |                     | <b>PPM Error</b> |                 |                    |
| C <sub>21</sub> H <sub>24</sub> F <sub>3</sub> N <sub>2</sub> O <sub>4</sub> | 425.1683                                      |                     | 0.11             |                 |                    |

<sup>1</sup>H NMR spectra of compound **3i**

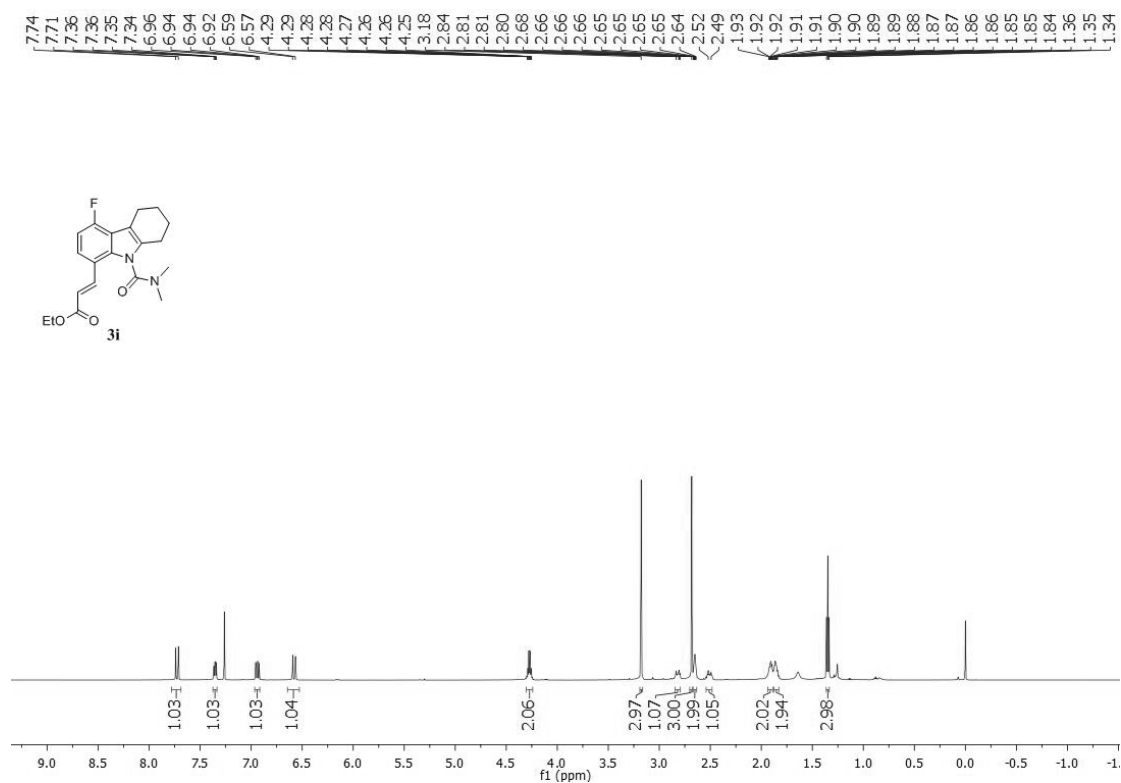

<sup>13</sup>C NMR spectra of compound **3i**

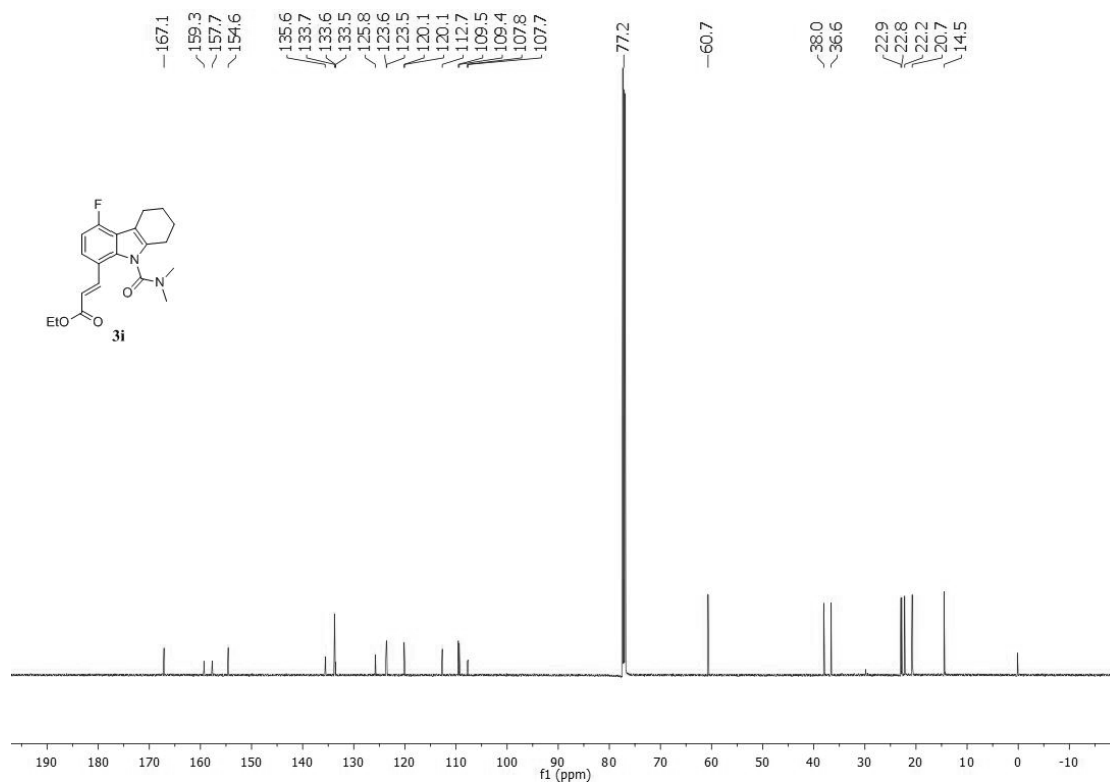

<sup>19</sup>F NMR spectra of compound **3i**

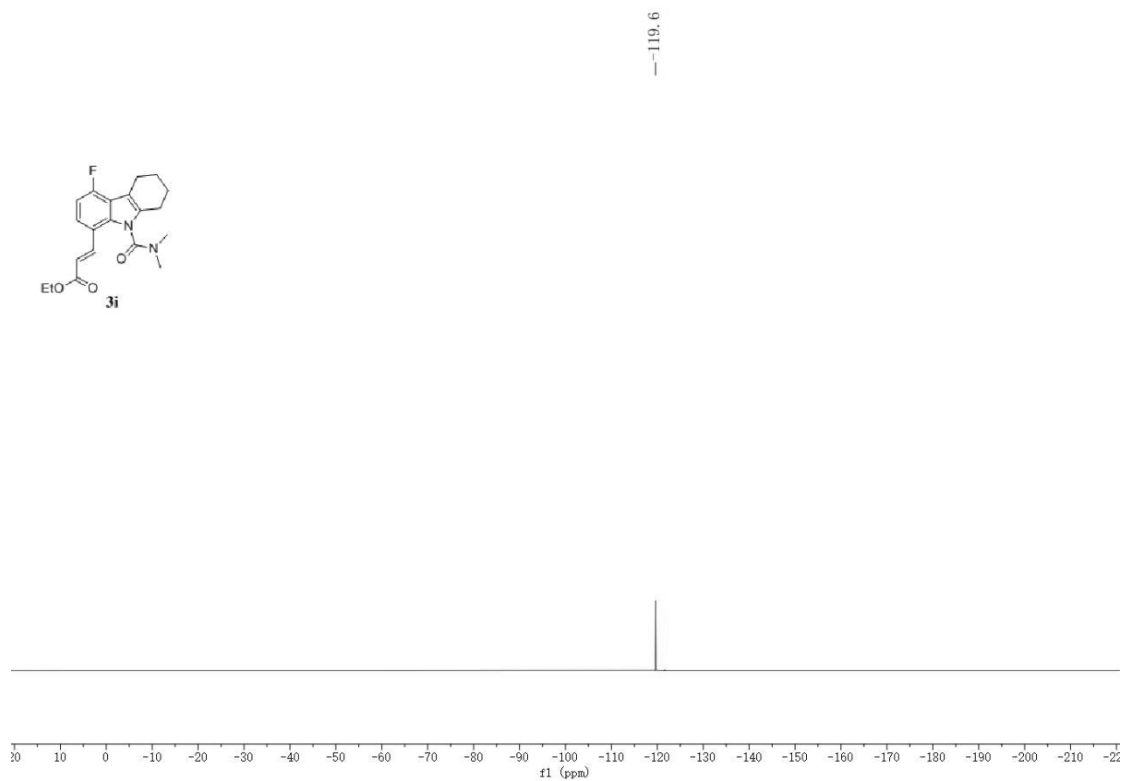

HRMS spectrum of compound **3i**

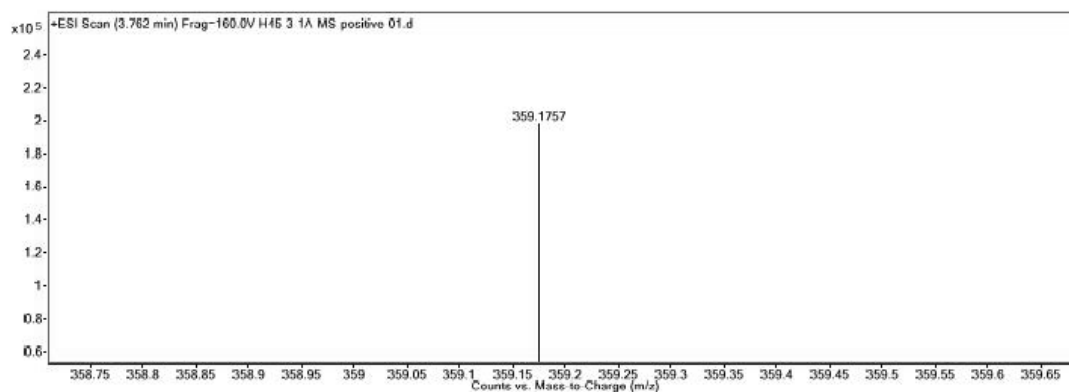

Elemental Composition Calculator

|                                                                |                                               |              |               |          |                    |
|----------------------------------------------------------------|-----------------------------------------------|--------------|---------------|----------|--------------------|
| Target m/z:                                                    | 359.1757                                      | Result type: | Positive ions | Species: | [M+H] <sup>+</sup> |
| Elements:                                                      | C (0-80); H (0-120); O (0-30); N(0-5); F(0-5) |              |               |          |                    |
| Ion Formula                                                    | Calculated m/z                                |              | PPM Error     |          |                    |
| C <sub>20</sub> H <sub>24</sub> FN <sub>2</sub> O <sub>3</sub> | 359.1765                                      |              | 2.46          |          |                    |

### <sup>1</sup>H NMR spectra of compound **3j**

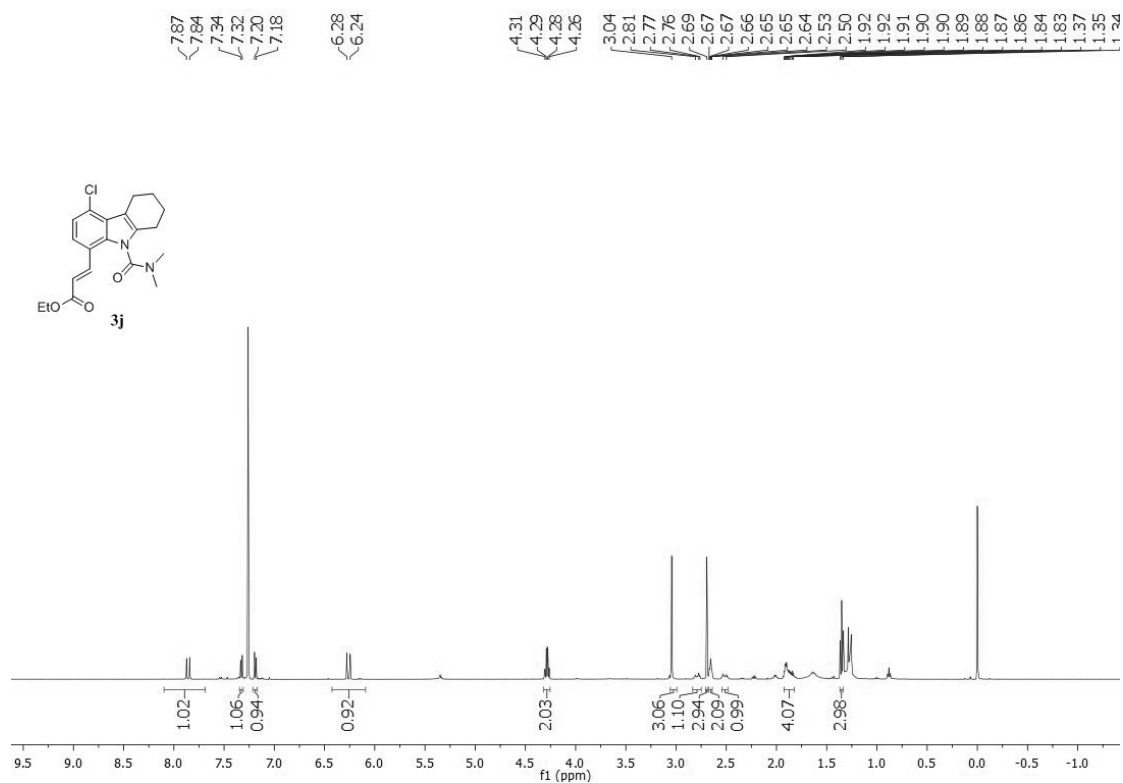

### <sup>13</sup>C NMR spectra of compound **3j**

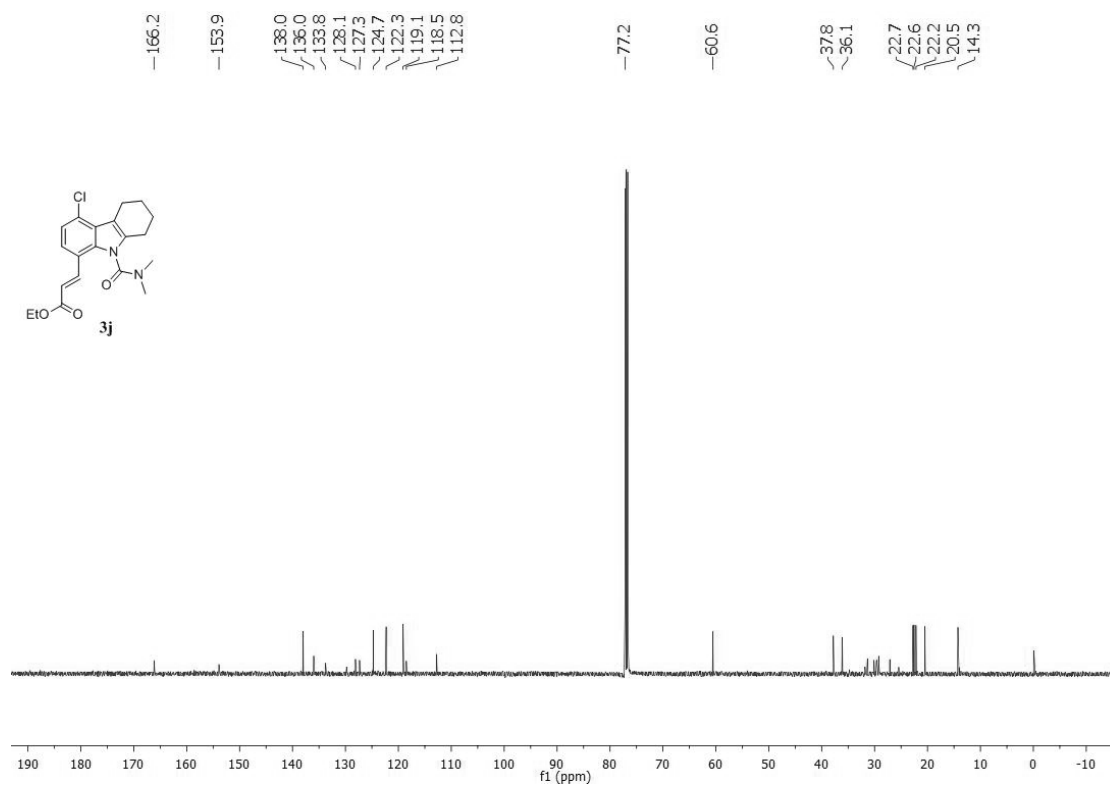

### HRMS spectrum of compound **3j**

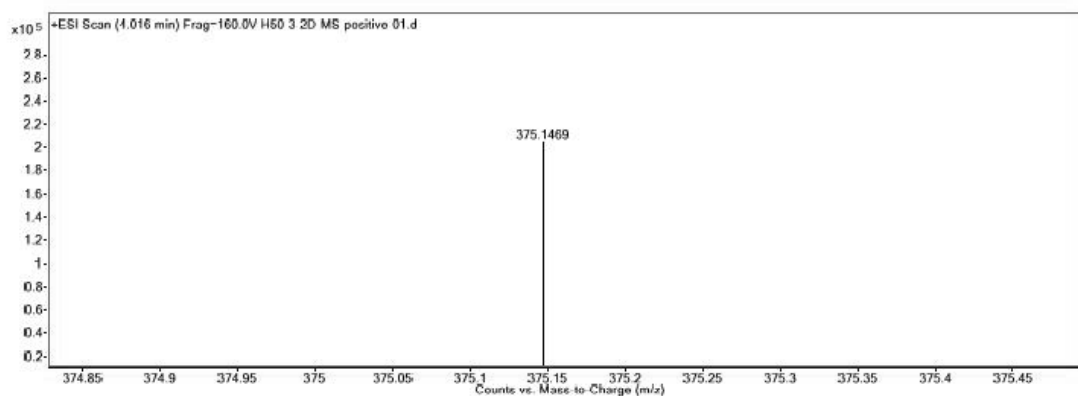

### Elemental Composition Calculator

|                                                                 |                                                |                     |                  |                 |                    |
|-----------------------------------------------------------------|------------------------------------------------|---------------------|------------------|-----------------|--------------------|
| <b>Target m/z:</b>                                              | 375.1469                                       | <b>Result type:</b> | Positive ions    | <b>Species:</b> | [M+H] <sup>+</sup> |
| <b>Elements:</b>                                                | C (0-80); H (0-120); O (0-30); N(0-5); Cl(0-5) |                     |                  |                 |                    |
| <b>Ion Formula</b>                                              | <b>Calculated m/z</b>                          |                     | <b>PPM Error</b> |                 |                    |
| C <sub>20</sub> H <sub>24</sub> CIN <sub>2</sub> O <sub>3</sub> | 375.1470                                       |                     | 0.37             |                 |                    |

### <sup>1</sup>H NMR spectra of compound **3k**

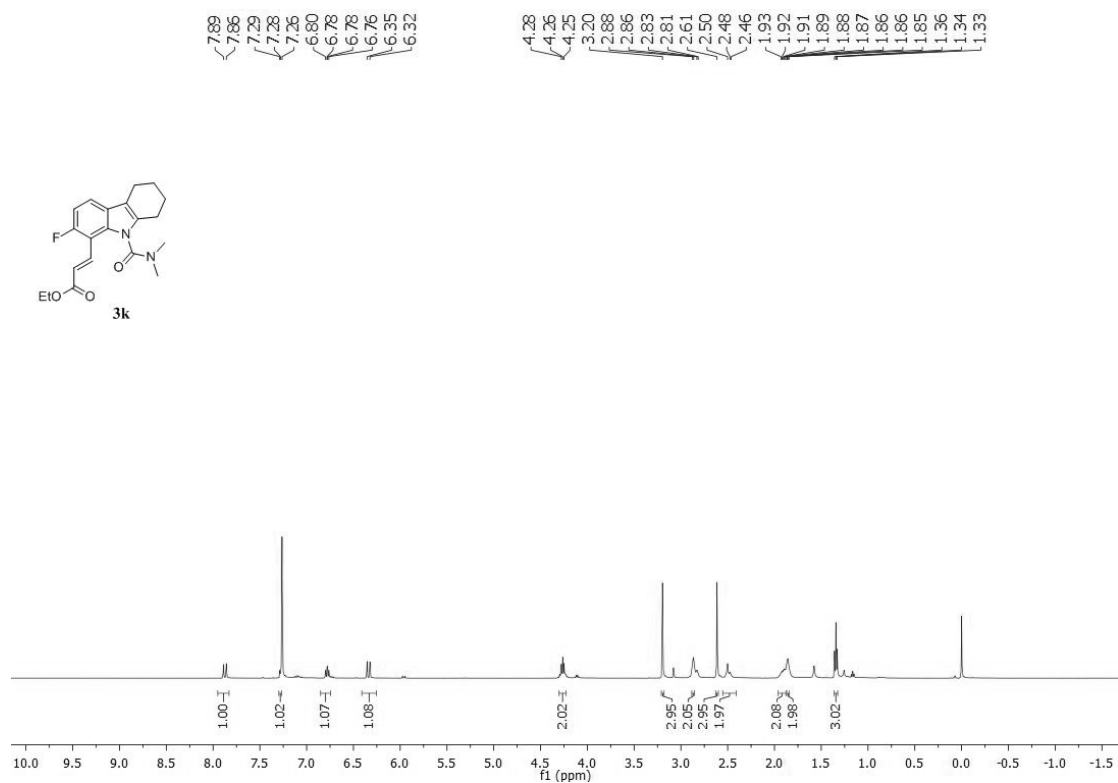

### <sup>13</sup>C NMR spectra of compound **3k**

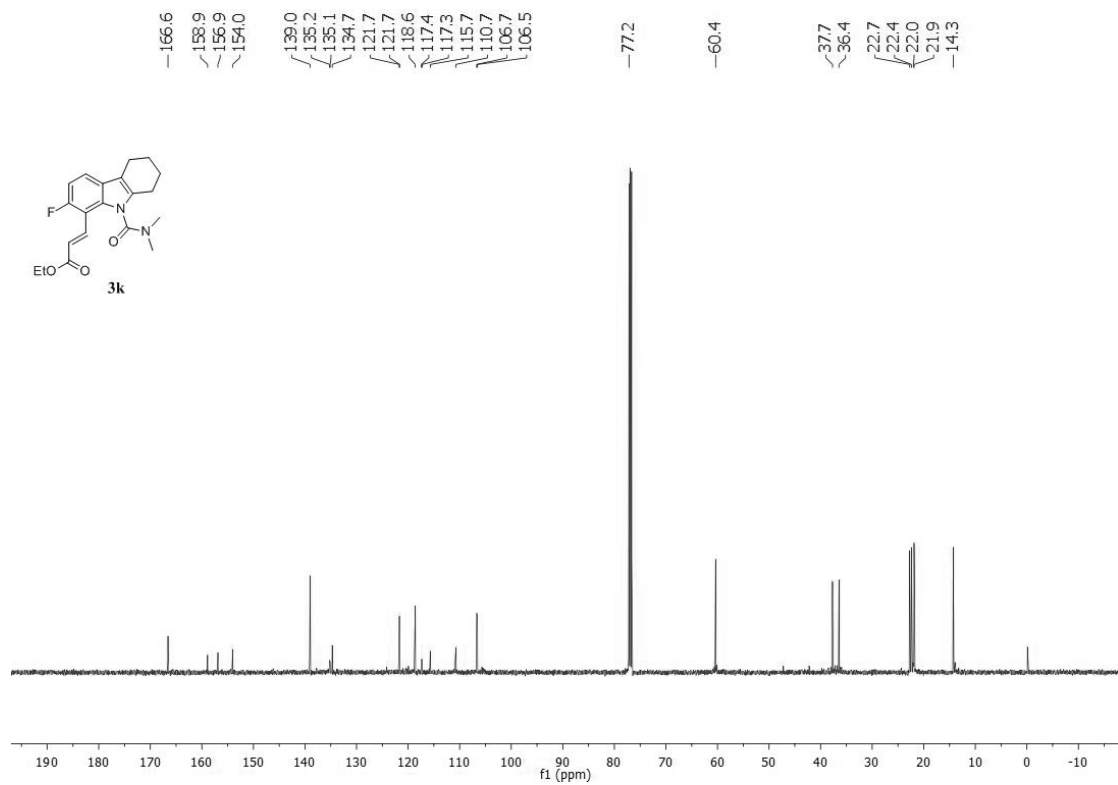

<sup>19</sup>F NMR spectra of compound **3k**

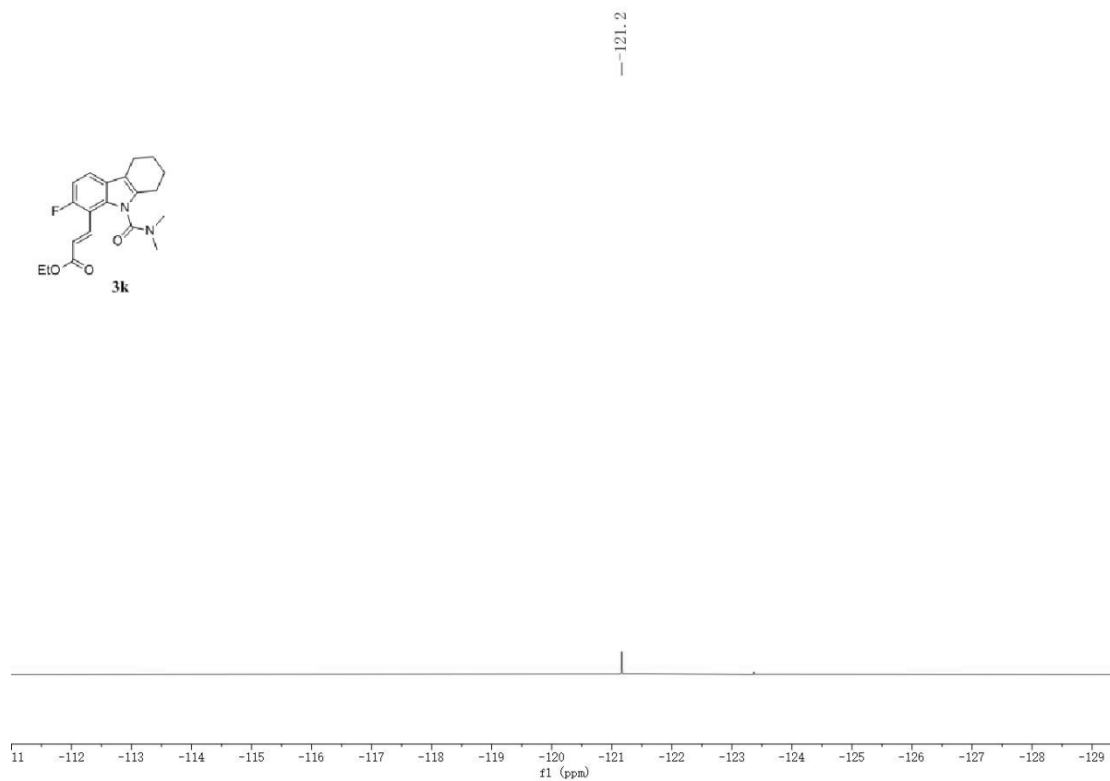

HRMS spectrum of compound **3k**

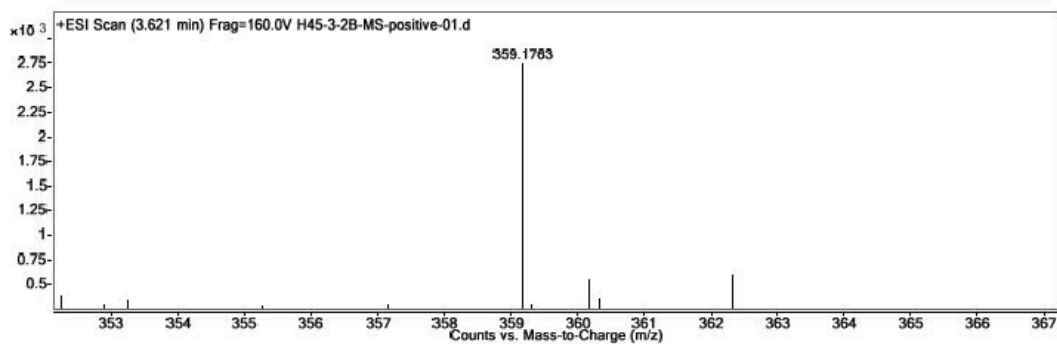

Elemental Composition Calculator

|                                                                |                                                |                     |                  |                 |                    |
|----------------------------------------------------------------|------------------------------------------------|---------------------|------------------|-----------------|--------------------|
| <b>Target m/z:</b>                                             | 359.1763                                       | <b>Result type:</b> | Positive ions    | <b>Species:</b> | [M+H] <sup>+</sup> |
| <b>Elements:</b>                                               | C (0-80); H (0-120); O (0-30) ; N(0-5) ;F(0-5) |                     |                  |                 |                    |
| <b>Ion Formula</b>                                             | <b>Calculated m/z</b>                          |                     | <b>PPM Error</b> |                 |                    |
| C <sub>20</sub> H <sub>24</sub> FN <sub>2</sub> O <sub>3</sub> | 359.1765                                       |                     | 0.75             |                 |                    |



### <sup>1</sup>H NMR spectra of compound **31**

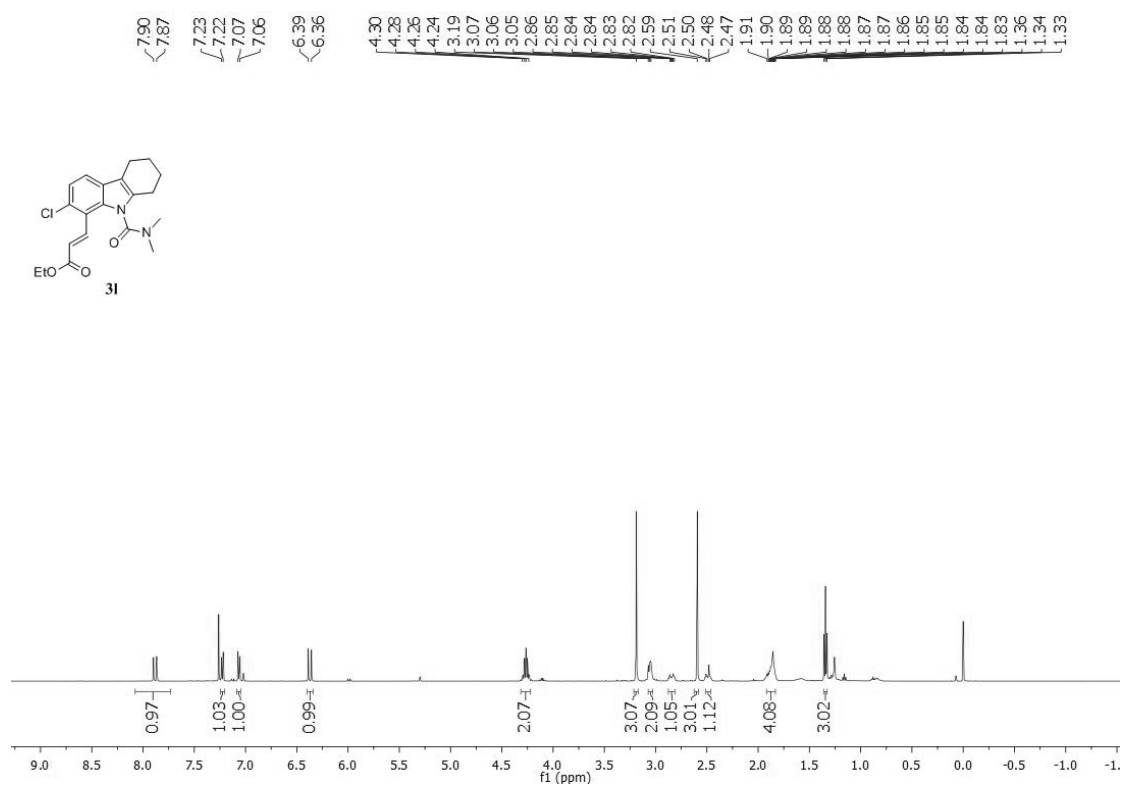

### <sup>13</sup>C NMR spectra of compound **31**

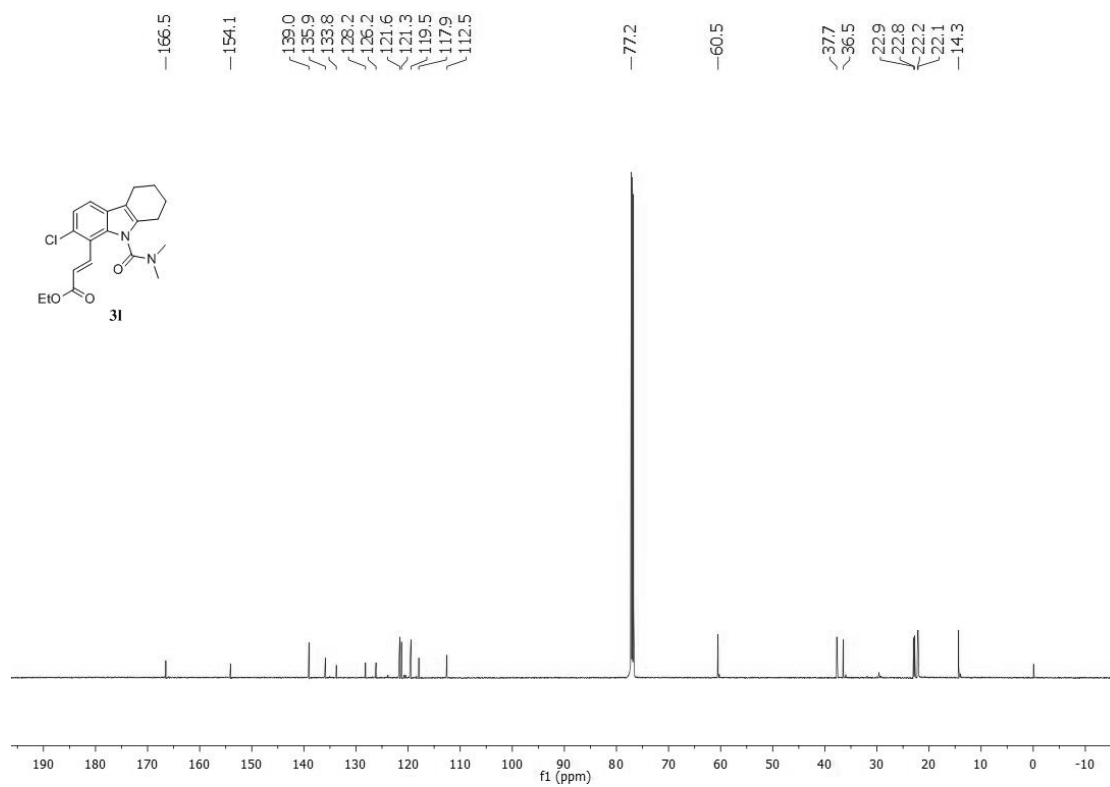

## HRMS spectrum of compound **31**

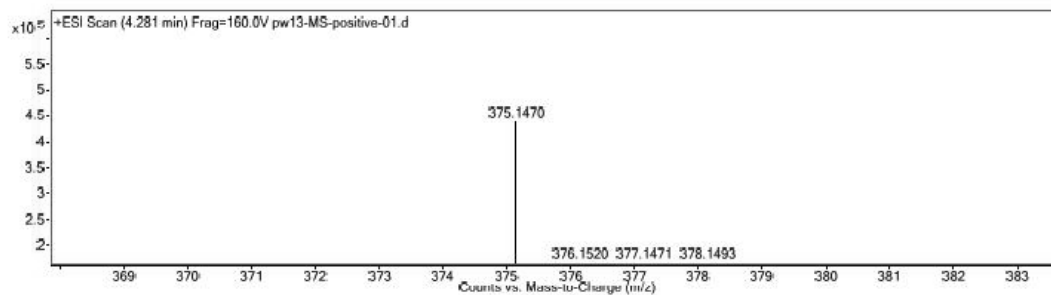

### Elemental Composition Calculator

|                                                                 |                                                  |                     |                  |                 |                    |
|-----------------------------------------------------------------|--------------------------------------------------|---------------------|------------------|-----------------|--------------------|
| <b>Target <math>m/z</math>:</b>                                 | 375.1470                                         | <b>Result type:</b> | Positive ions    | <b>Species:</b> | [M+H] <sup>+</sup> |
| <b>Elements:</b>                                                | C (0-80); H (0-120); O (0-30) ; N(0-5) ; Cl(0-5) |                     |                  |                 |                    |
| <b>Ion Formula</b>                                              | <b>Calculated <math>m/z</math></b>               |                     | <b>PPM Error</b> |                 |                    |
| C <sub>20</sub> H <sub>24</sub> ClN <sub>2</sub> O <sub>3</sub> | 375.1470                                         |                     | -0.11            |                 |                    |

### <sup>1</sup>H NMR spectra of compound **3m**

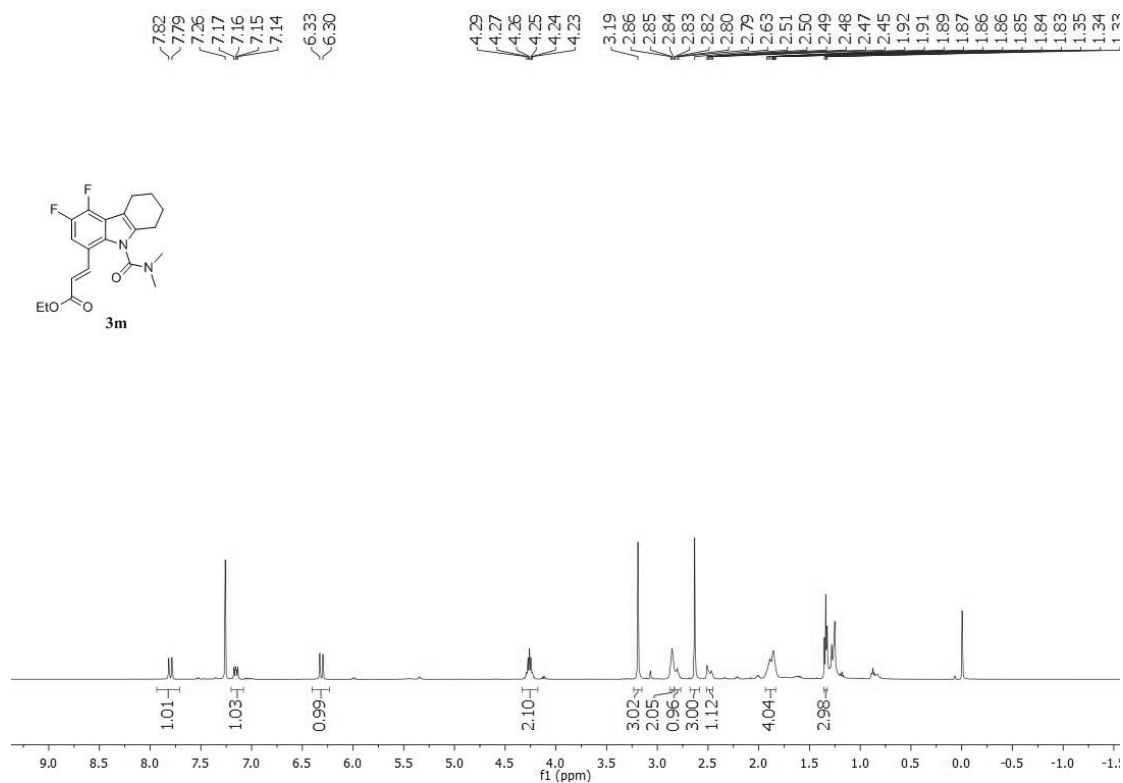

### <sup>13</sup>C NMR spectra of compound **3m**

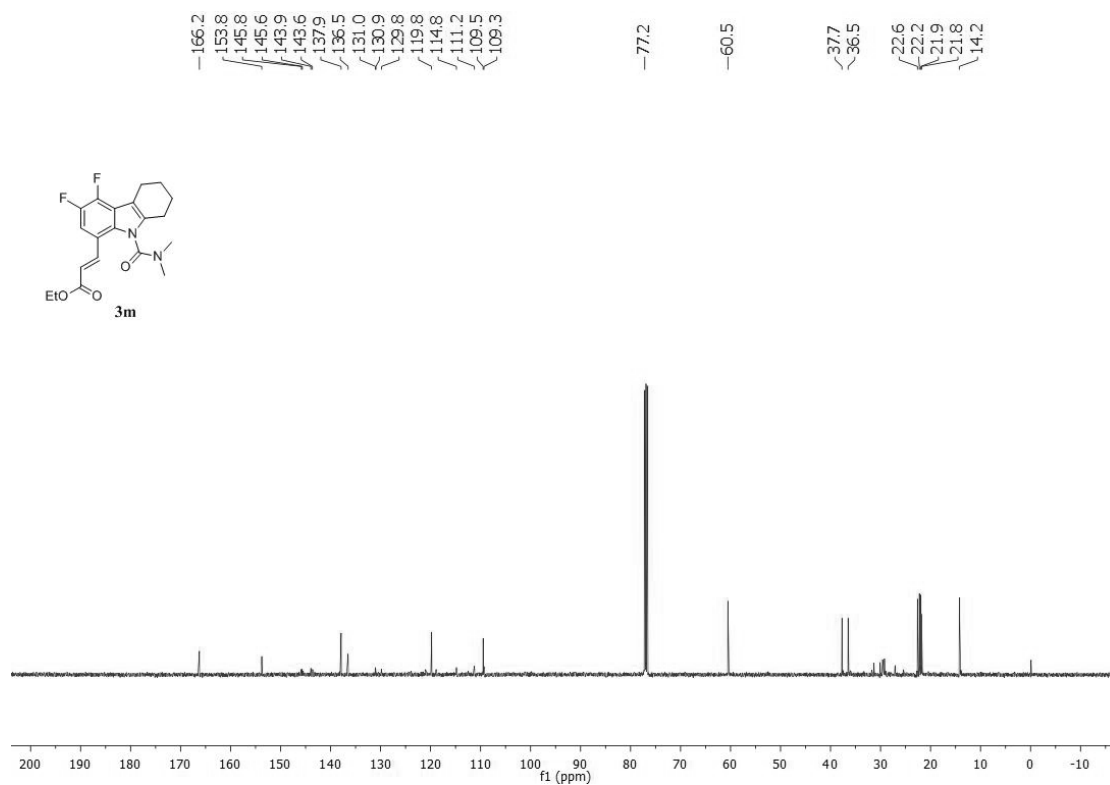

## <sup>19</sup>F NMR spectra of compound **3m**

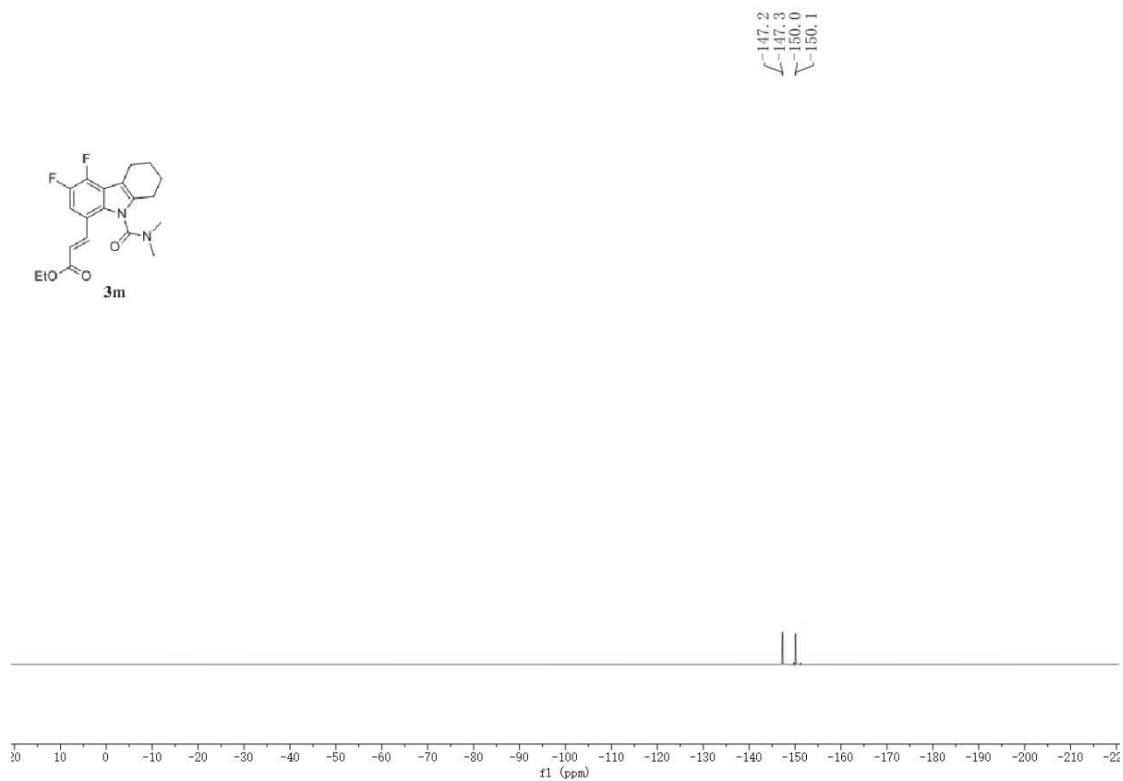

## HRMS spectrum of compound **3m**

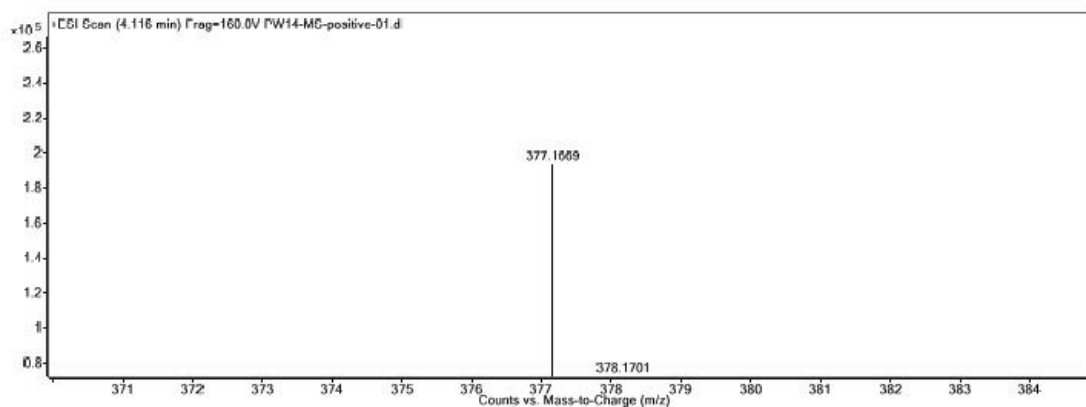

### Elemental Composition Calculator

|                                                                              |                                               |                     |                  |                 |                    |
|------------------------------------------------------------------------------|-----------------------------------------------|---------------------|------------------|-----------------|--------------------|
| <b>Target m/z:</b>                                                           | 377.1669                                      | <b>Result type:</b> | Positive ions    | <b>Species:</b> | [M+H] <sup>+</sup> |
| <b>Elements:</b>                                                             | C (0-80); H (0-120); O (0-30); N(0-5); F(0-5) |                     |                  |                 |                    |
| <b>Ion Formula</b>                                                           | <b>Calculated m/z</b>                         |                     | <b>PPM Error</b> |                 |                    |
| C <sub>20</sub> H <sub>23</sub> F <sub>2</sub> N <sub>2</sub> O <sub>3</sub> | 377.1671                                      |                     | 0.48             |                 |                    |

### <sup>1</sup>H NMR spectra of compound **3n**

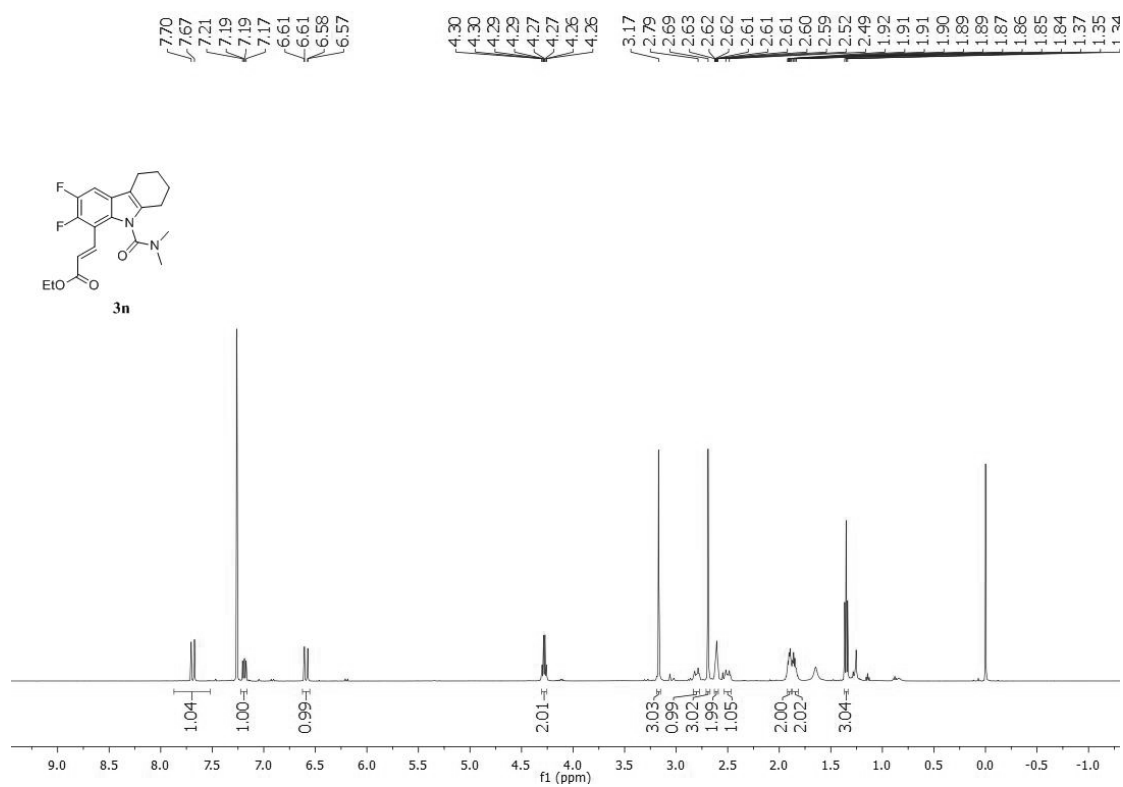

### <sup>13</sup>C NMR spectra of compound **3n**

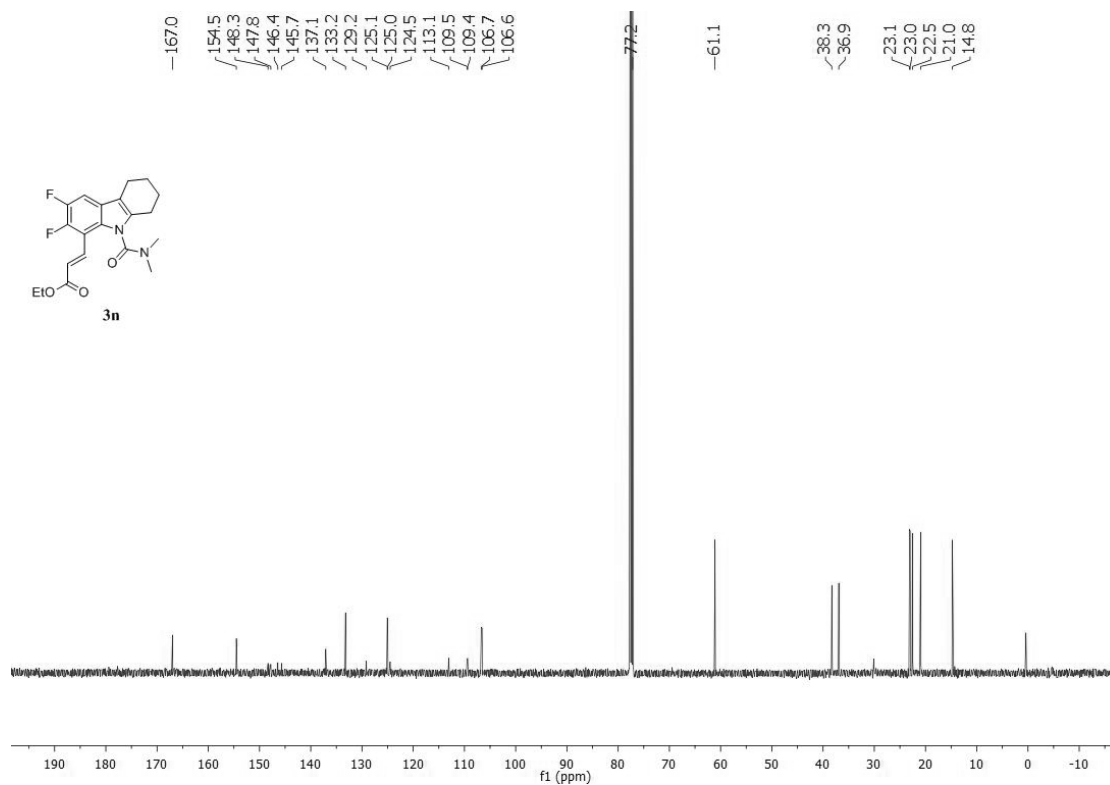

## <sup>19</sup>F NMR spectra of compound **3n**

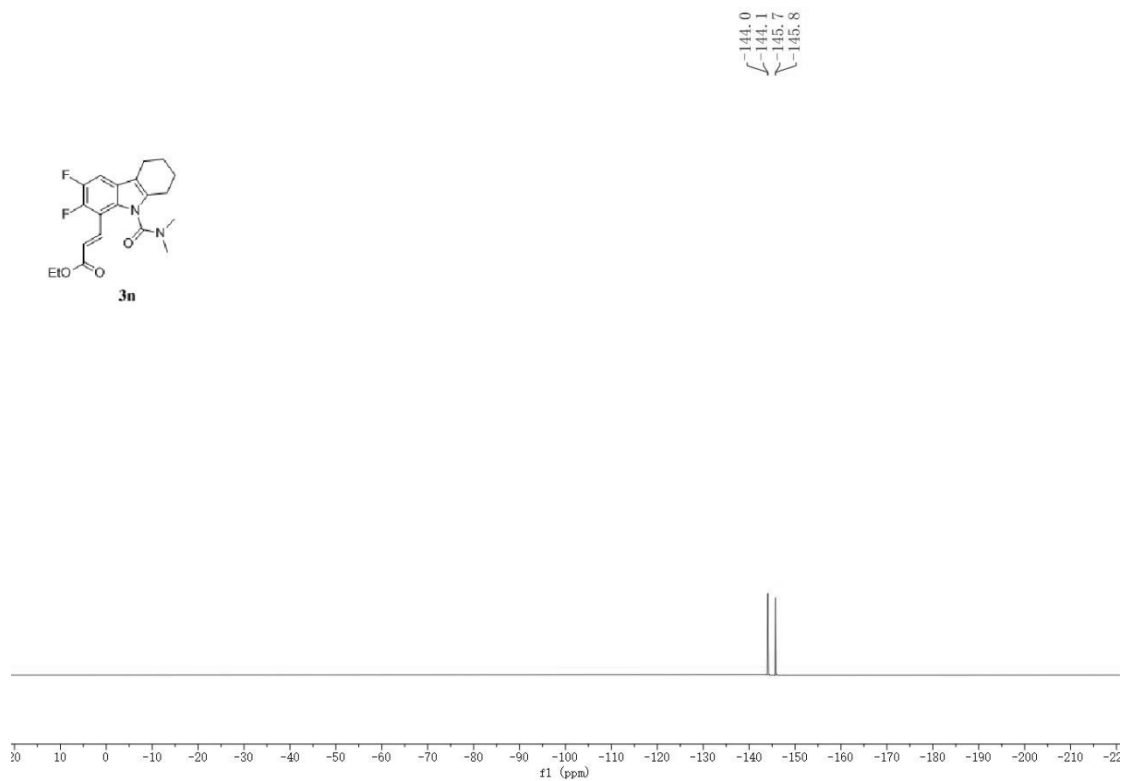

## HRMS spectrum of compound **3n**

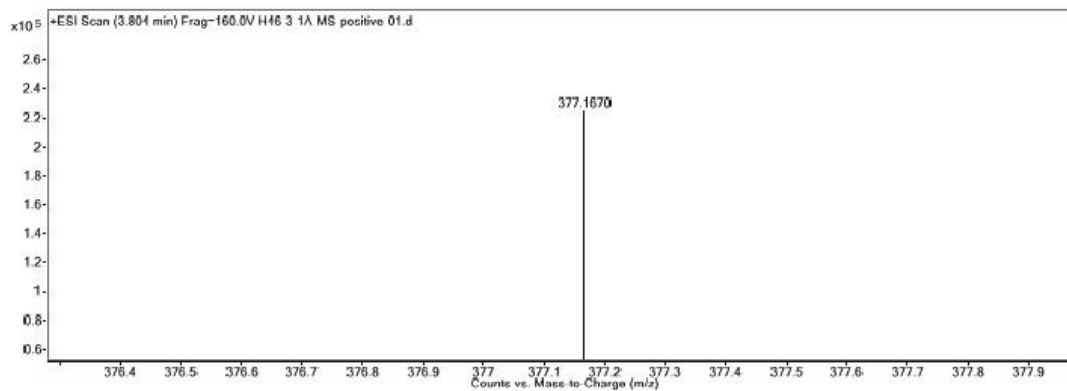

### Elemental Composition Calculator

|                                                                              |                                                 |                     |                  |                 |                    |
|------------------------------------------------------------------------------|-------------------------------------------------|---------------------|------------------|-----------------|--------------------|
| <b>Target m/z:</b>                                                           | 377.1670                                        | <b>Result type:</b> | Positive ions    | <b>Species:</b> | [M+H] <sup>+</sup> |
| <b>Elements:</b>                                                             | C (0-80); H (0-120); O (0-30) ; N(0-5) ; F(0-5) |                     |                  |                 |                    |
| <b>Ion Formula</b>                                                           | <b>Calculated m/z</b>                           |                     | <b>PPM Error</b> |                 |                    |
| C <sub>20</sub> H <sub>23</sub> F <sub>2</sub> N <sub>2</sub> O <sub>3</sub> | 377.1671                                        |                     | 0.31             |                 |                    |

<sup>1</sup>H NMR spectra of compound **3o**

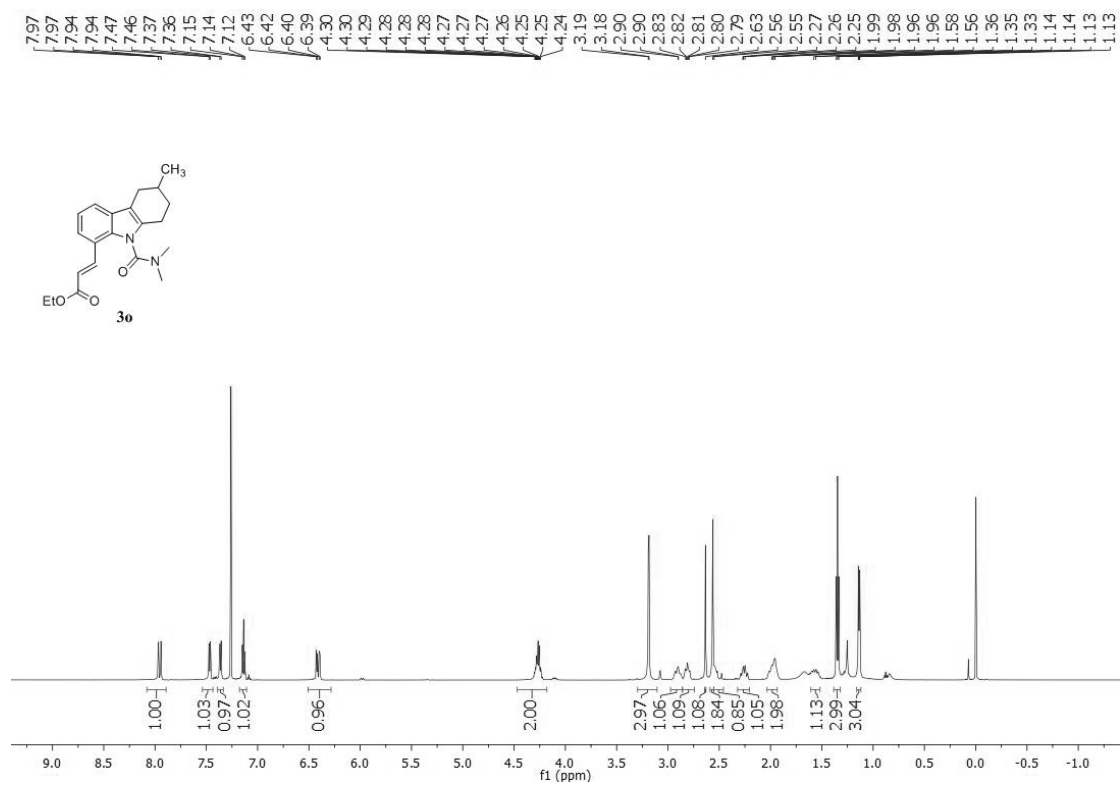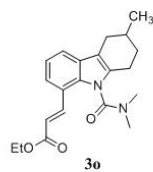

<sup>13</sup>C NMR spectra of compound **3o**

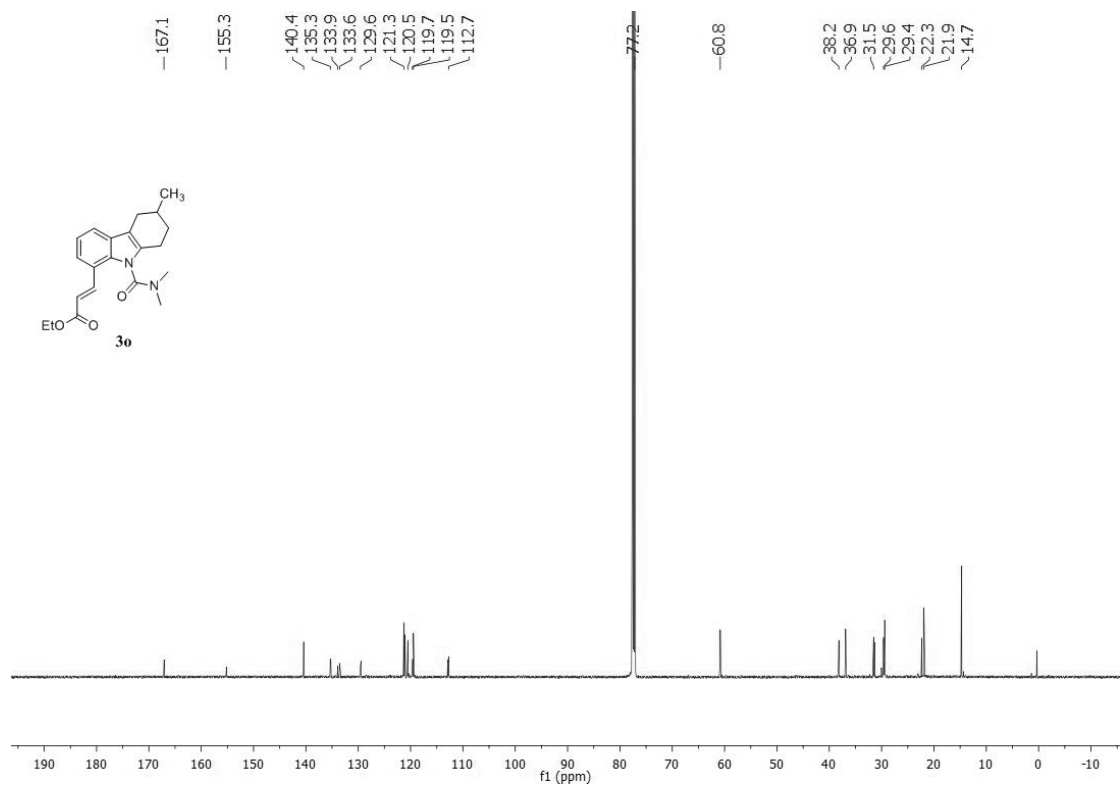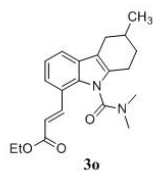

## HRMS spectrum of compound **30**

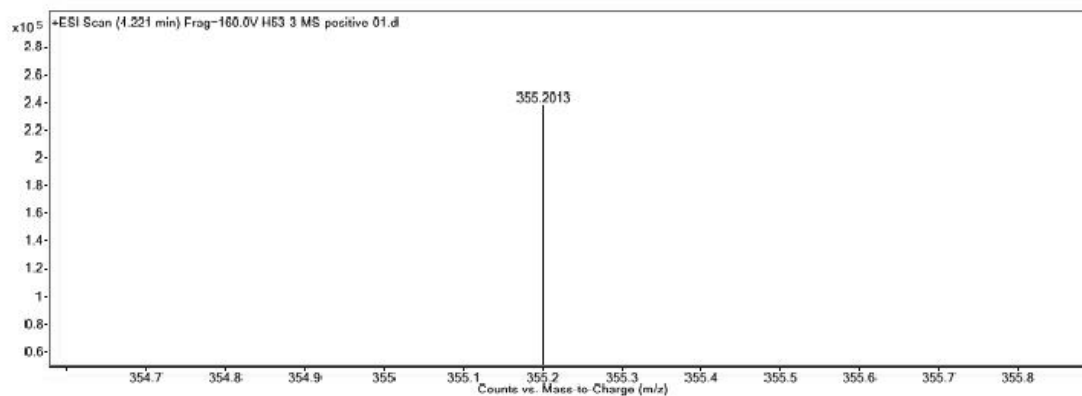

### Elemental Composition Calculator

|                                                               |                                       |                     |                  |                 |                    |
|---------------------------------------------------------------|---------------------------------------|---------------------|------------------|-----------------|--------------------|
| <b>Target m/z:</b>                                            | 355.2013                              | <b>Result type:</b> | Positive ions    | <b>Species:</b> | [M+H] <sup>+</sup> |
| <b>Elements:</b>                                              | C (0-80); H (0-120); O (0-30); N(0-5) |                     |                  |                 |                    |
| <b>Ion Formula</b>                                            | <b>Calculated m/z</b>                 |                     | <b>PPM Error</b> |                 |                    |
| C <sub>21</sub> H <sub>27</sub> N <sub>2</sub> O <sub>3</sub> | 355.2016                              |                     | 0.95             |                 |                    |



### <sup>1</sup>H NMR spectra of compound **3p**

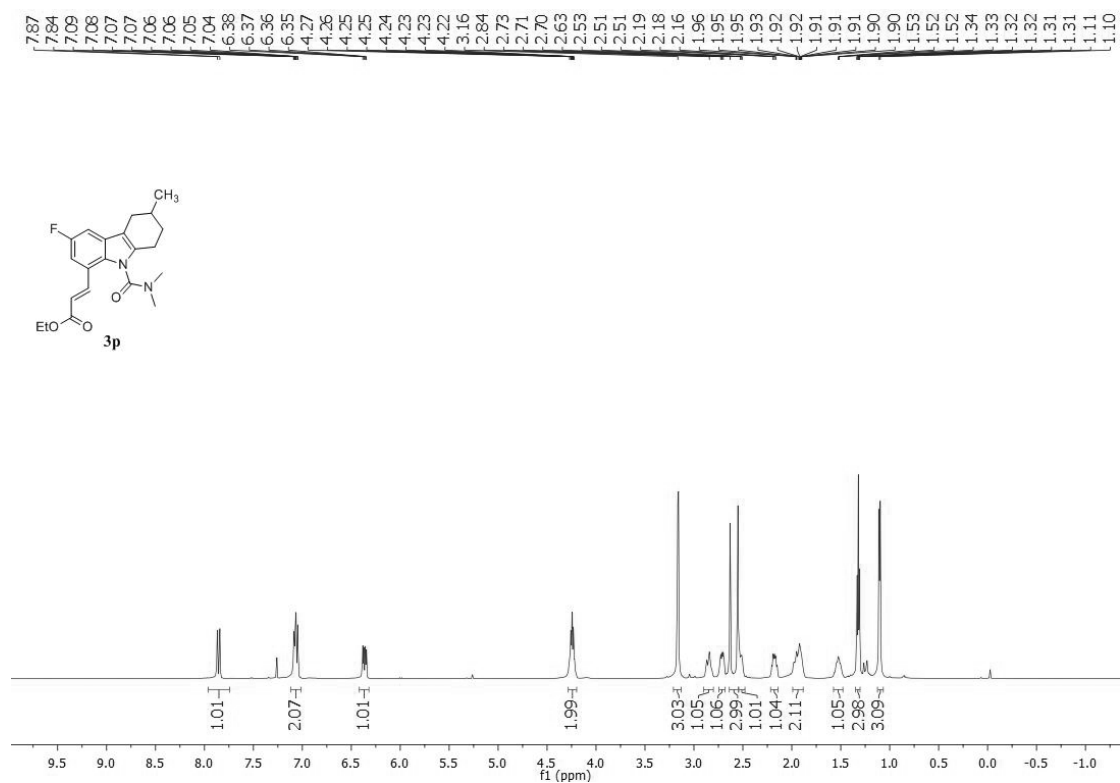

### <sup>13</sup>C NMR spectra of compound **3p**

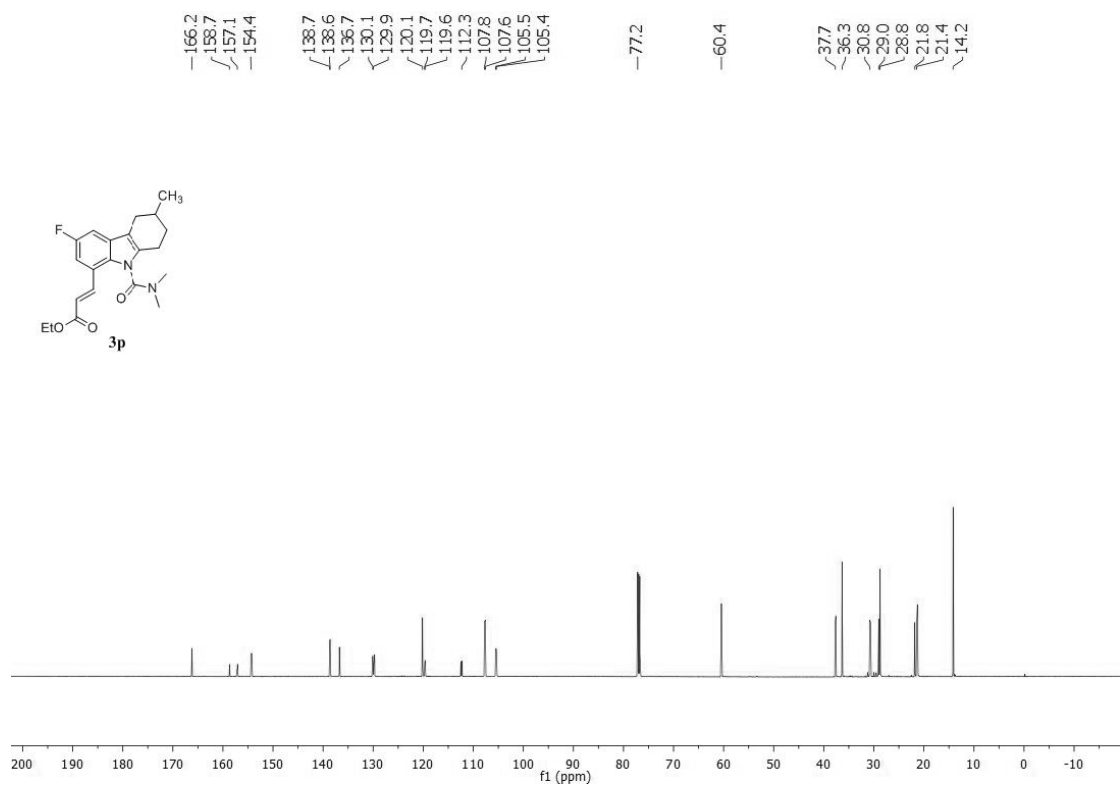

## <sup>19</sup>F NMR spectra of compound **3p**

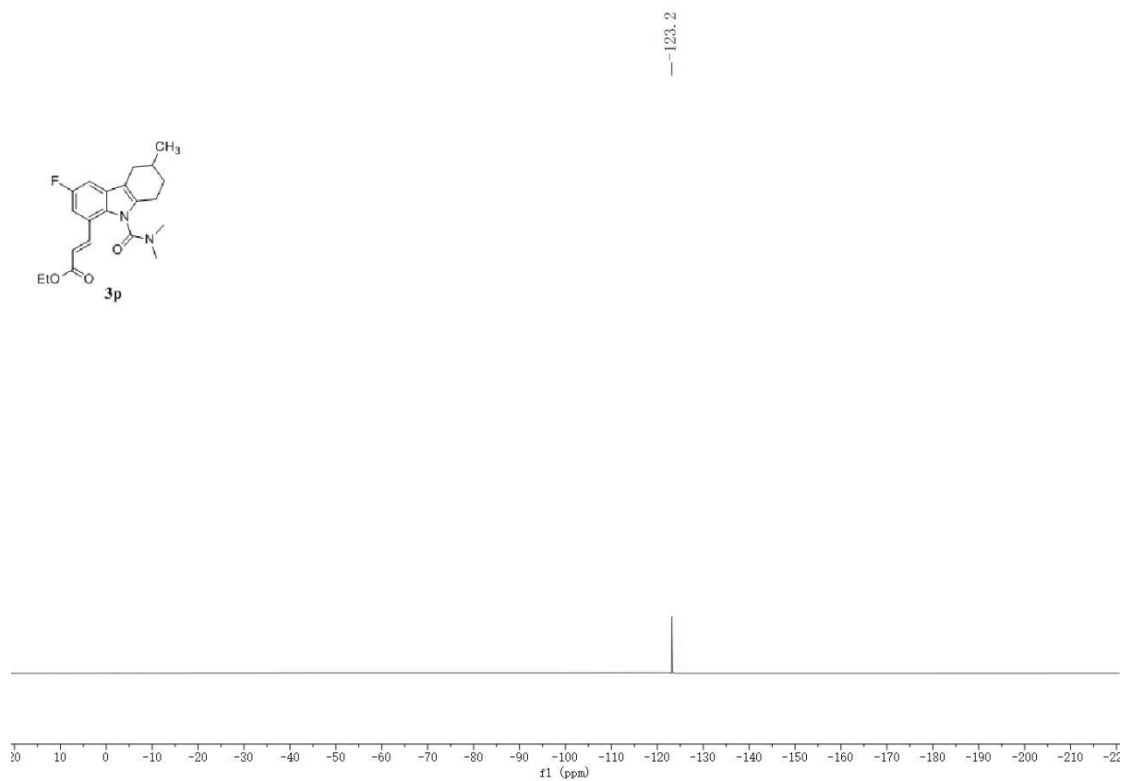

## HRMS spectrum of compound **3p**

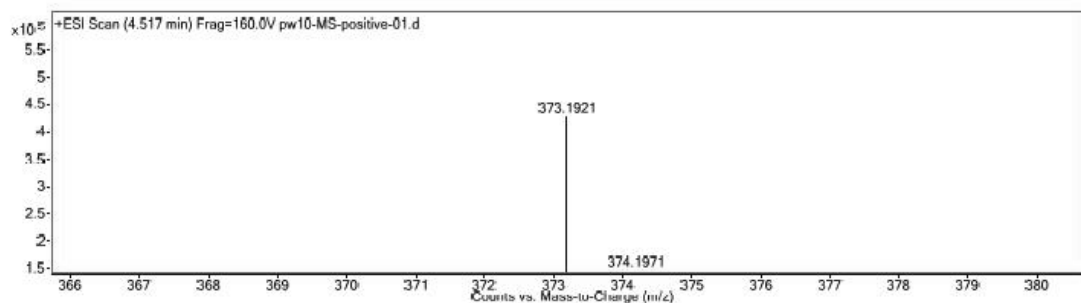

### Elemental Composition Calculator

|                                                                |                                               |                     |                  |                 |                    |
|----------------------------------------------------------------|-----------------------------------------------|---------------------|------------------|-----------------|--------------------|
| <b>Target m/z:</b>                                             | 373.1921                                      | <b>Result type:</b> | Positive ions    | <b>Species:</b> | [M+H] <sup>+</sup> |
| <b>Elements:</b>                                               | C (0-80); H (0-120); O (0-30); N(0-5); F(0-5) |                     |                  |                 |                    |
| <b>Ion Formula</b>                                             | <b>Calculated m/z</b>                         |                     | <b>PPM Error</b> |                 |                    |
| C <sub>21</sub> H <sub>26</sub> FN <sub>2</sub> O <sub>3</sub> | 373.1922                                      |                     | 0.29             |                 |                    |

### <sup>1</sup>H NMR spectra of compound **3q**

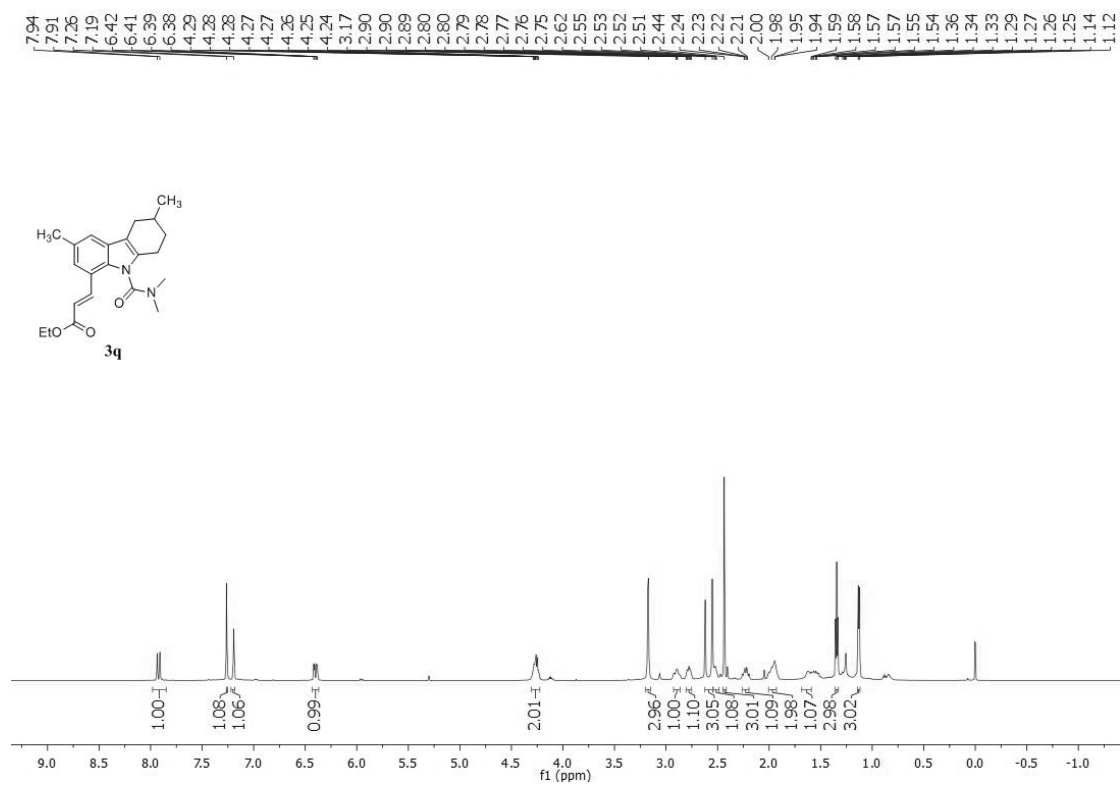

### <sup>13</sup>C NMR spectra of compound **3q**

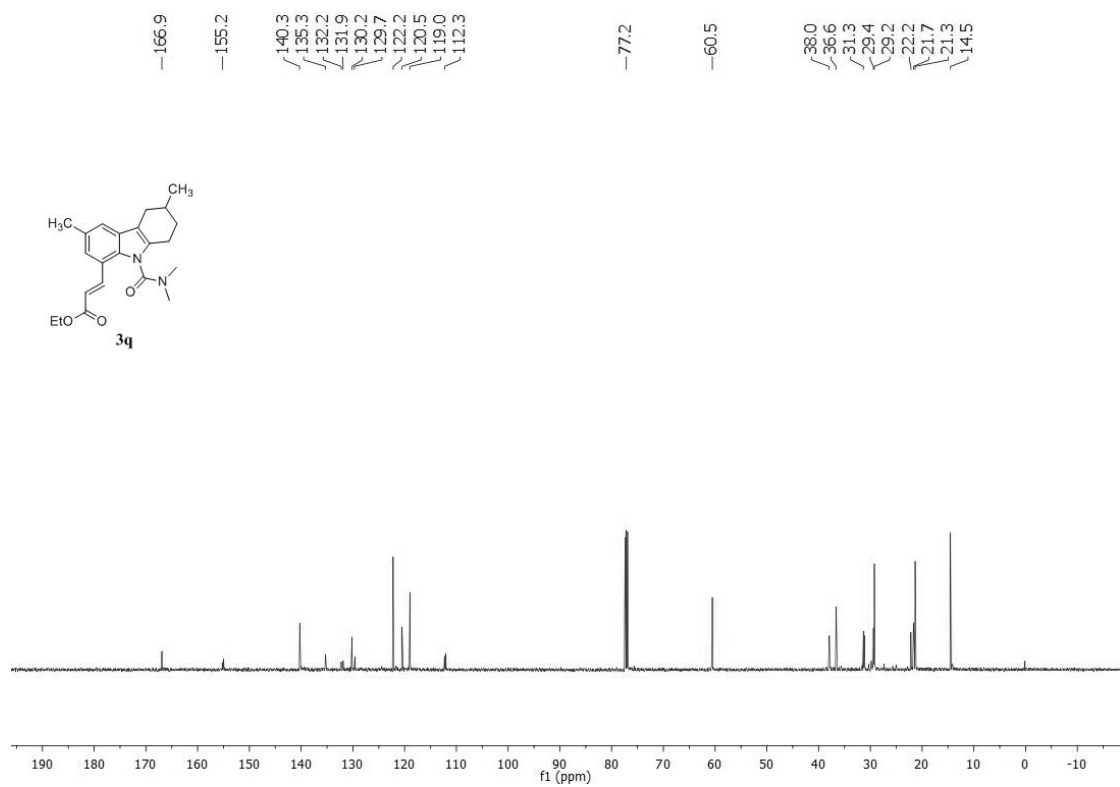

## HRMS spectrum of compound **3q**

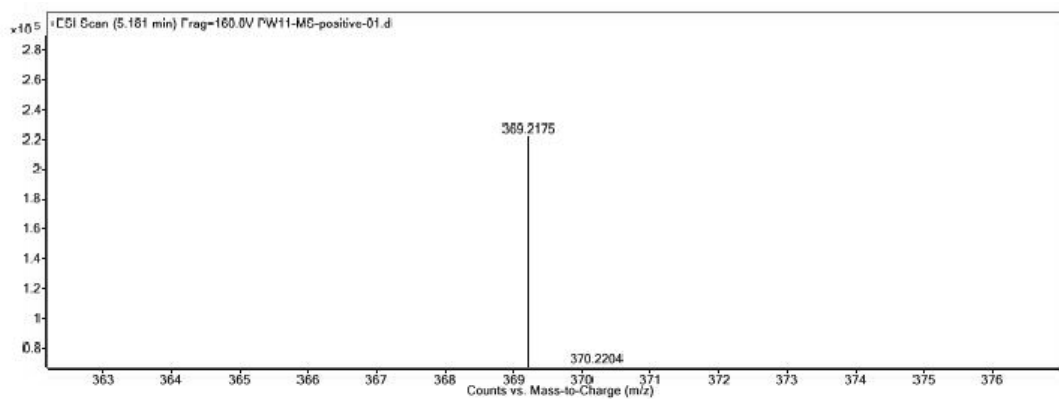

### Elemental Composition Calculator

|                                                               |                                        |                     |                  |                 |                    |
|---------------------------------------------------------------|----------------------------------------|---------------------|------------------|-----------------|--------------------|
| <b>Target m/z:</b>                                            | 369.2175                               | <b>Result type:</b> | Positive ions    | <b>Species:</b> | [M+H] <sup>+</sup> |
| <b>Elements:</b>                                              | C (0-80); H (0-120); O (0-30) ; N(0-5) |                     |                  |                 |                    |
| <b>Ion Formula</b>                                            | <b>Calculated m/z</b>                  |                     | <b>PPM Error</b> |                 |                    |
| C <sub>22</sub> H <sub>29</sub> N <sub>2</sub> O <sub>3</sub> | 369.2173                               |                     | -0.57            |                 |                    |

### <sup>1</sup>H NMR spectra of compound **3r**

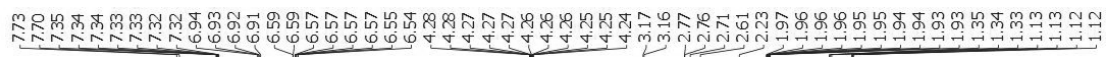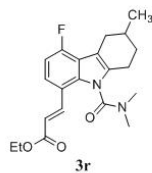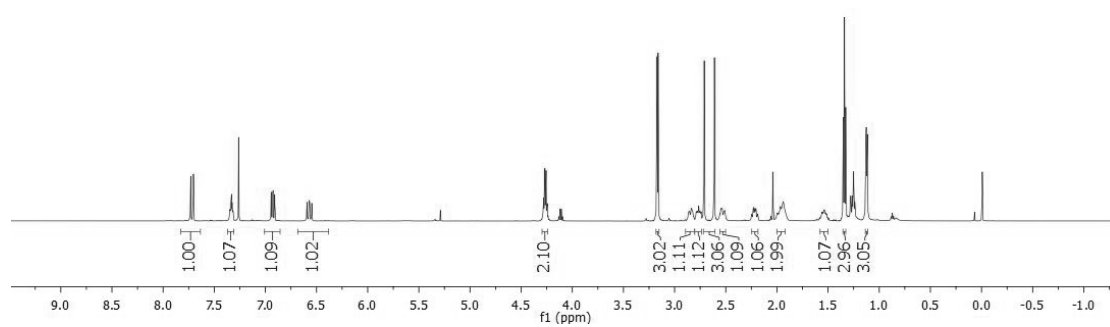

### <sup>13</sup>C NMR spectra of compound **3r**

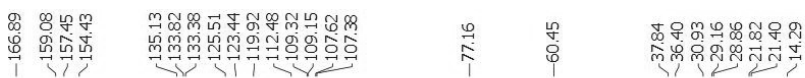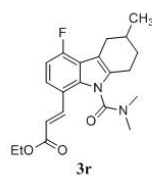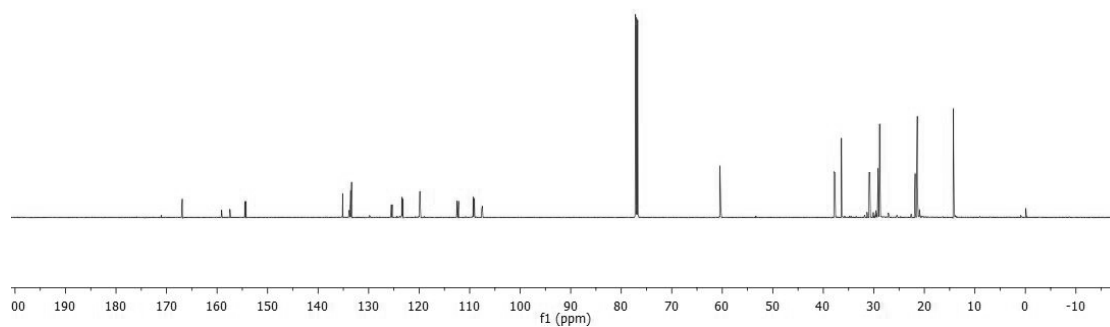

<sup>19</sup>F NMR spectra of compound **3r**

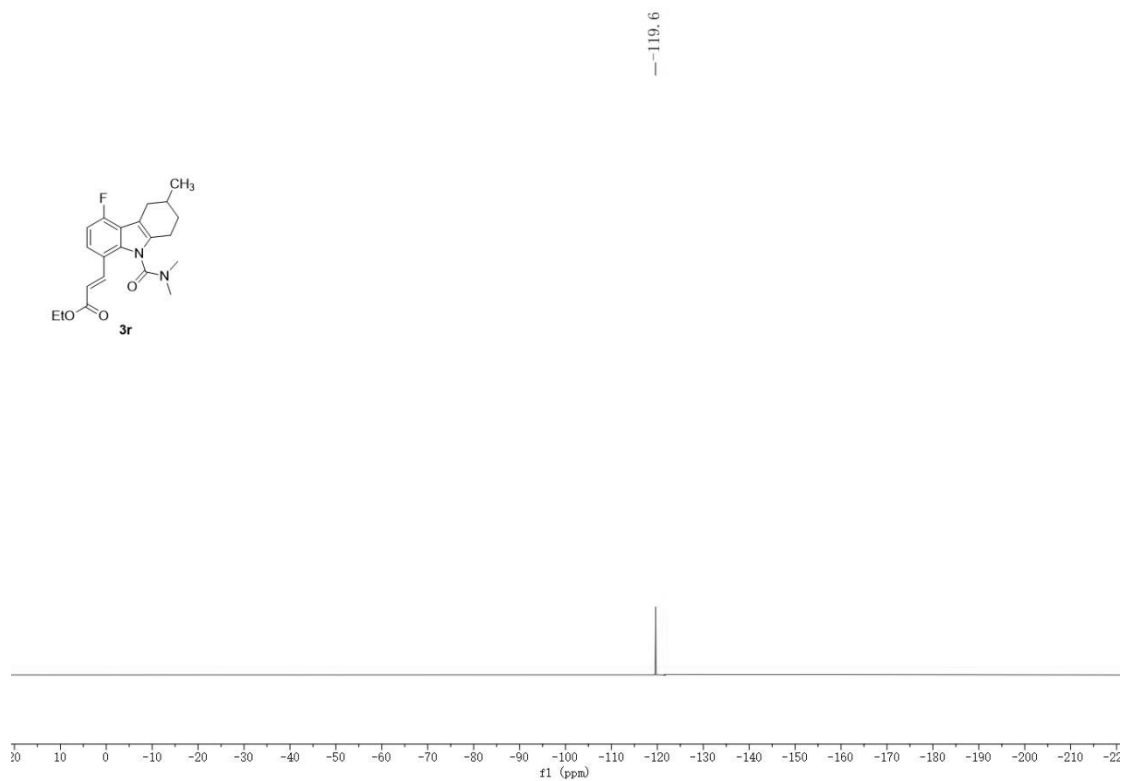

HRMS spectrum of compound **3r**

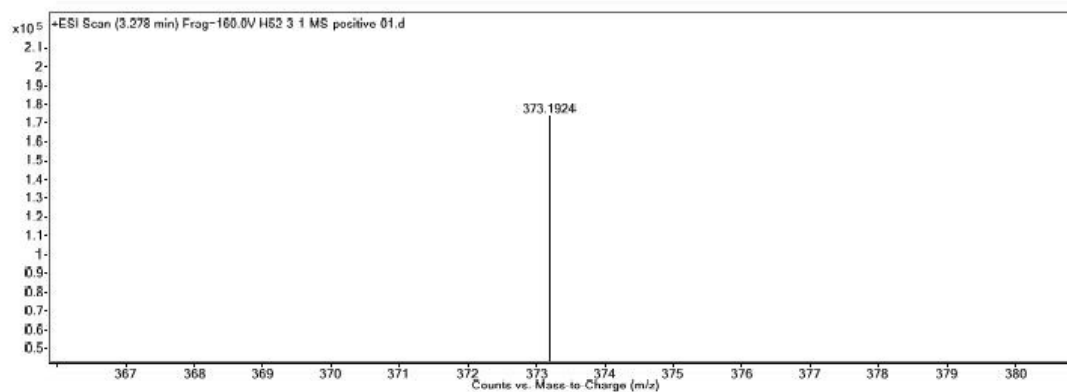

Elemental Composition Calculator

|                                                                |                                               |                     |               |                 |                    |
|----------------------------------------------------------------|-----------------------------------------------|---------------------|---------------|-----------------|--------------------|
| <b>Target m/z:</b>                                             | 373.1924                                      | <b>Result type:</b> | Positive ions | <b>Species:</b> | [M+H] <sup>+</sup> |
| <b>Elements:</b>                                               | C (0-80); H (0-120); O (0-30); N(0-5); F(0-5) |                     |               |                 |                    |
| <b>Ion Formula</b>                                             | <b>Calculated m/z</b>                         | <b>PPM Error</b>    |               |                 |                    |
| C <sub>21</sub> H <sub>26</sub> FN <sub>2</sub> O <sub>3</sub> | 373.1922                                      | -0.6                |               |                 |                    |

### <sup>1</sup>H NMR spectra of compound **3s**

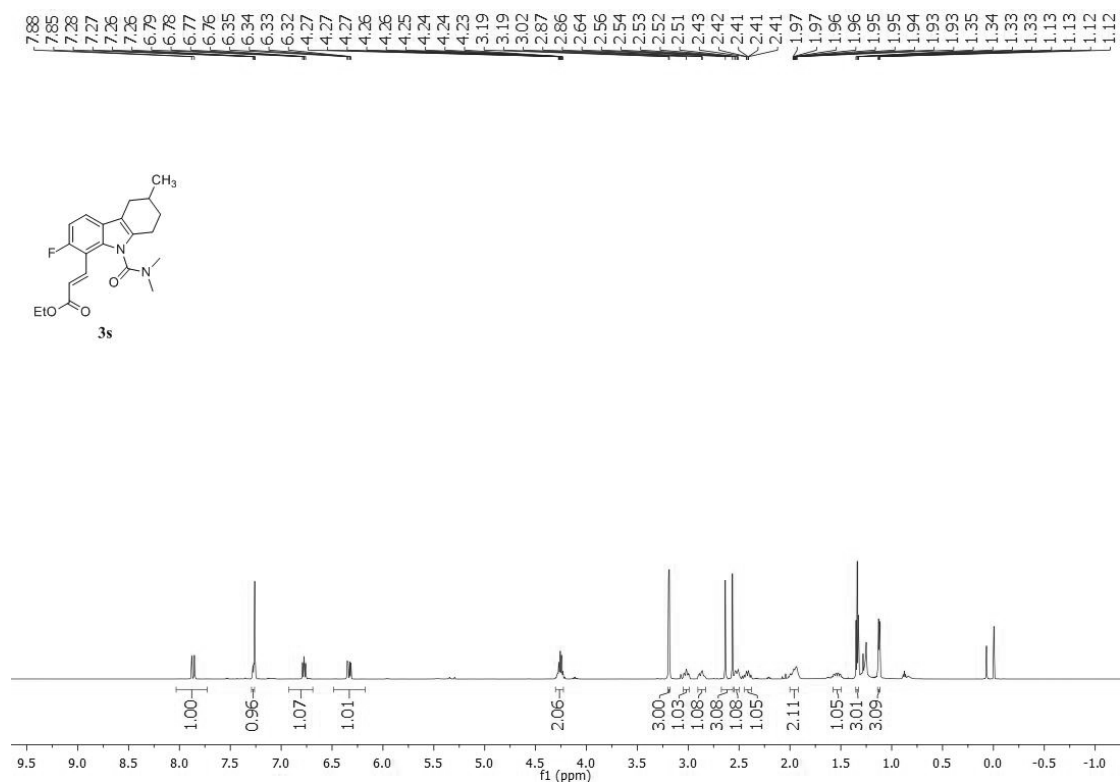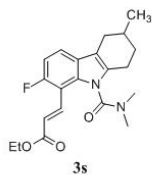

### <sup>13</sup>C NMR spectra of compound **3s**

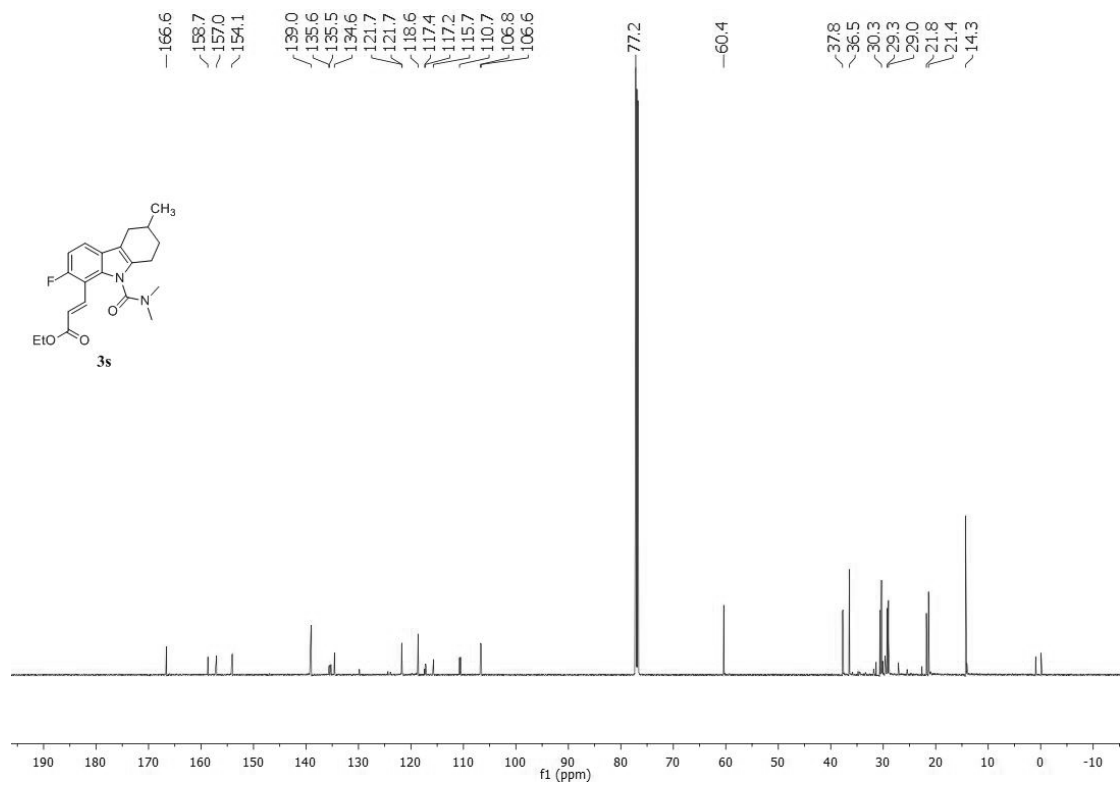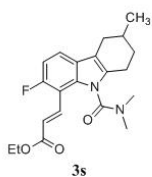

## <sup>19</sup>F NMR spectra of compound **3s**

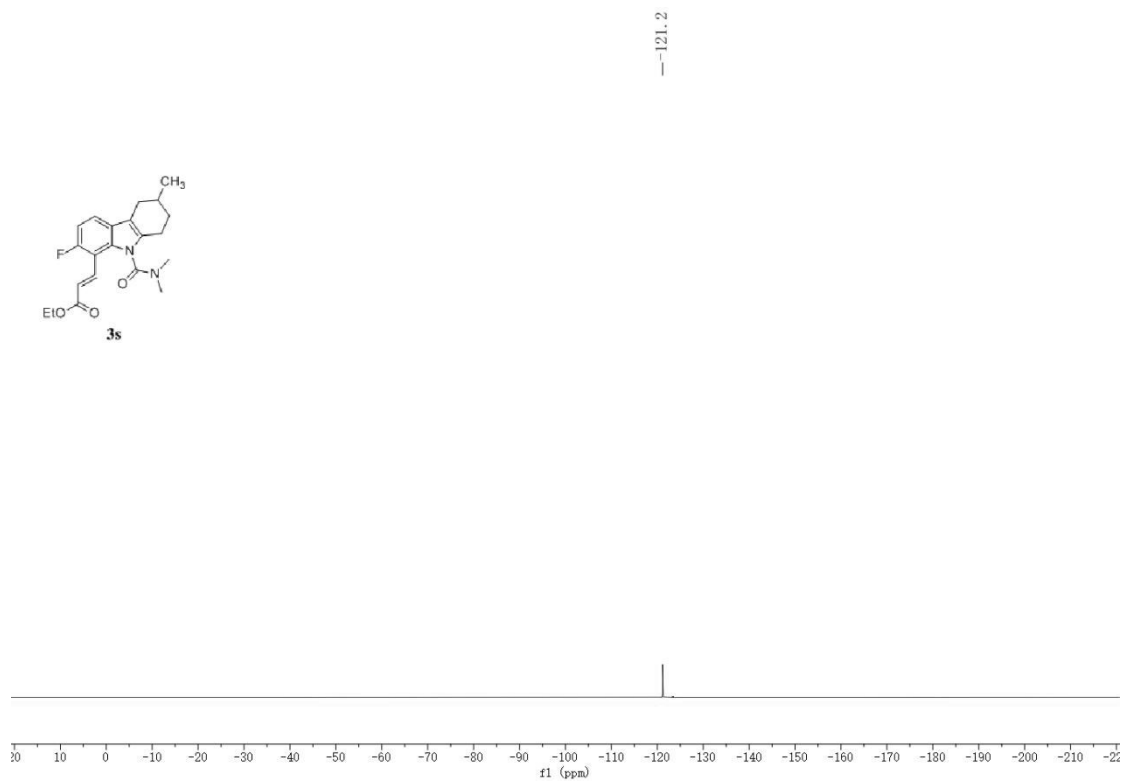

## HRMS spectrum of compound **3s**

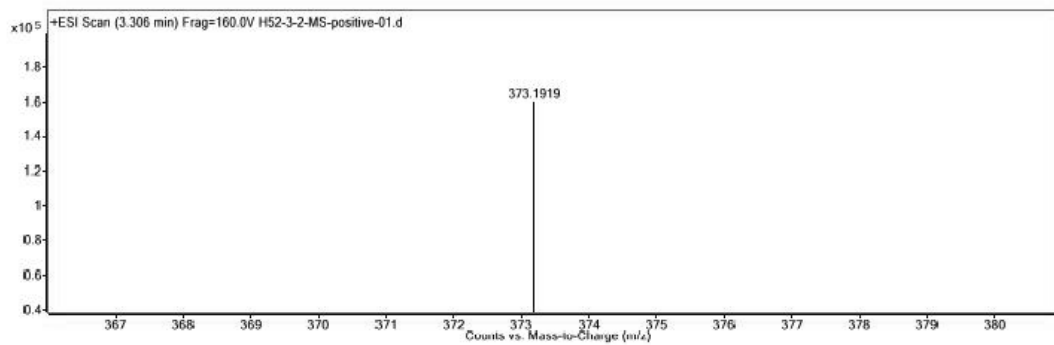

### Elemental Composition Calculator

|                                                                |                                               |                     |                  |                 |                    |
|----------------------------------------------------------------|-----------------------------------------------|---------------------|------------------|-----------------|--------------------|
| <b>Target m/z:</b>                                             | 373.1919                                      | <b>Result type:</b> | Positive ions    | <b>Species:</b> | [M+H] <sup>+</sup> |
| <b>Elements:</b>                                               | C (0-80); H (0-120); O (0-30); N(0-5); F(0-5) |                     |                  |                 |                    |
| <b>Ion Formula</b>                                             | <b>Calculated m/z</b>                         |                     | <b>PPM Error</b> |                 |                    |
| C <sub>21</sub> H <sub>26</sub> FN <sub>2</sub> O <sub>3</sub> | 373.1922                                      |                     | 0.76             |                 |                    |



### <sup>1</sup>H NMR spectra of compound **3t**

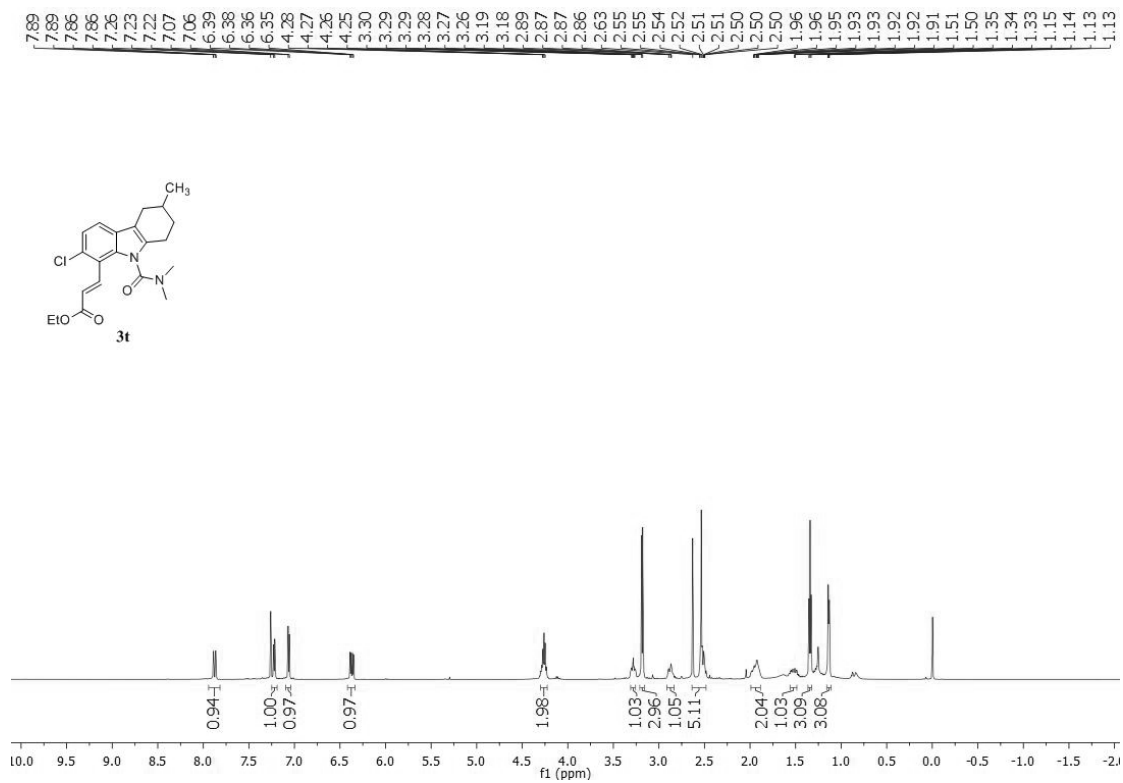

### <sup>13</sup>C NMR spectra of compound **3t**

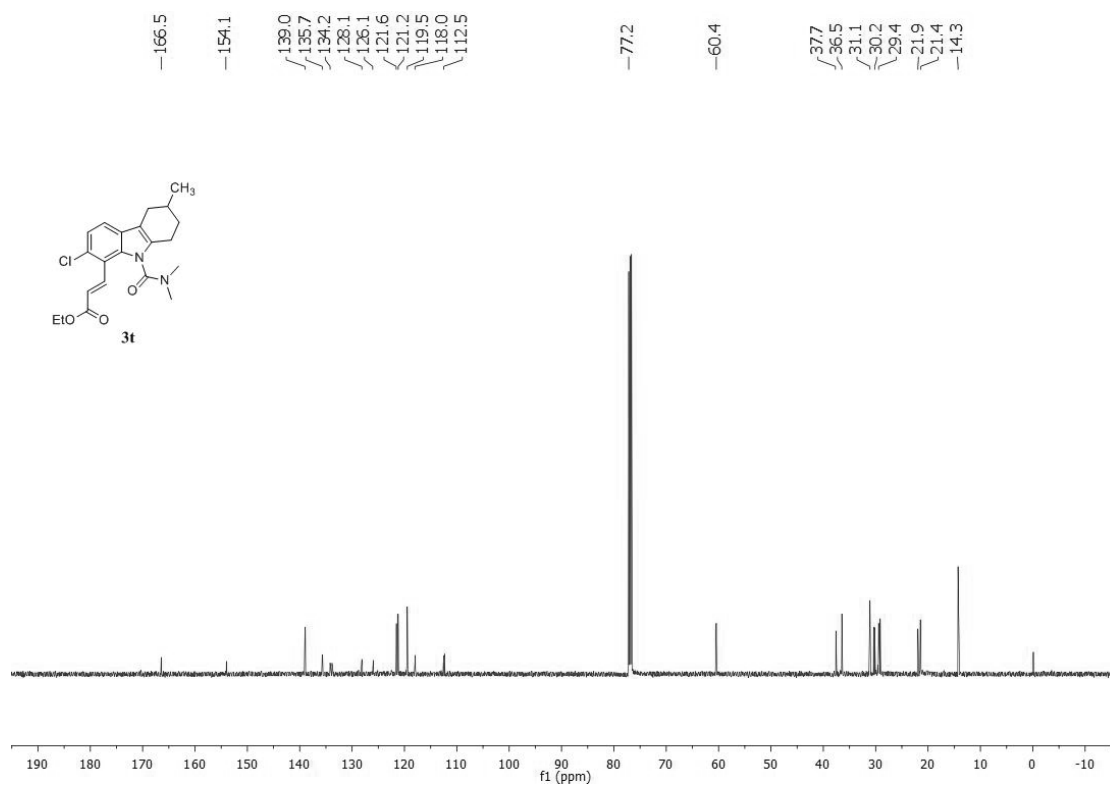

## HRMS spectrum of compound **3t**

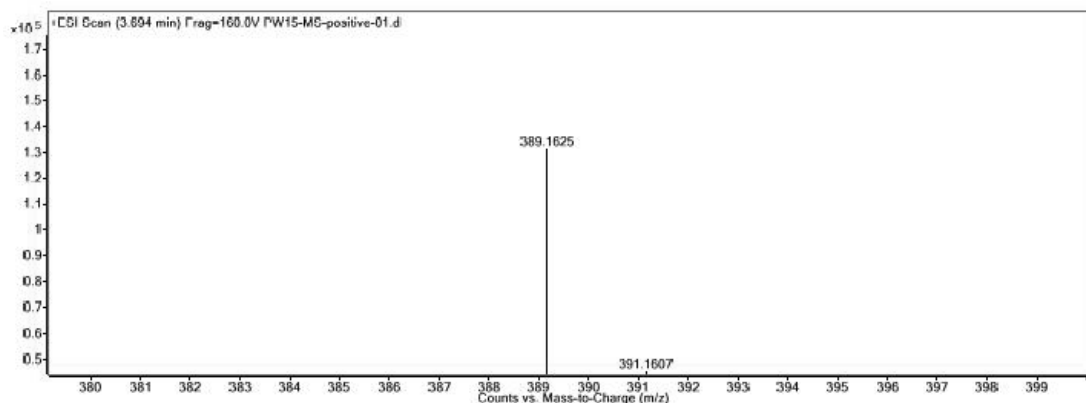

### Elemental Composition Calculator

|                                                                 |                                                  |                     |                  |                 |                    |
|-----------------------------------------------------------------|--------------------------------------------------|---------------------|------------------|-----------------|--------------------|
| <b>Target m/z:</b>                                              | 389.1625                                         | <b>Result type:</b> | Positive ions    | <b>Species:</b> | [M+H] <sup>+</sup> |
| <b>Elements:</b>                                                | C (0-80); H (0-120); O (0-30) ; N(0-5) ; Cl(0-5) |                     |                  |                 |                    |
| <b>Ion Formula</b>                                              | <b>Calculated m/z</b>                            |                     | <b>PPM Error</b> |                 |                    |
| C <sub>21</sub> H <sub>26</sub> ClN <sub>2</sub> O <sub>3</sub> | 389.1626                                         |                     | 0.32             |                 |                    |

### <sup>1</sup>H NMR spectra of compound **3u**

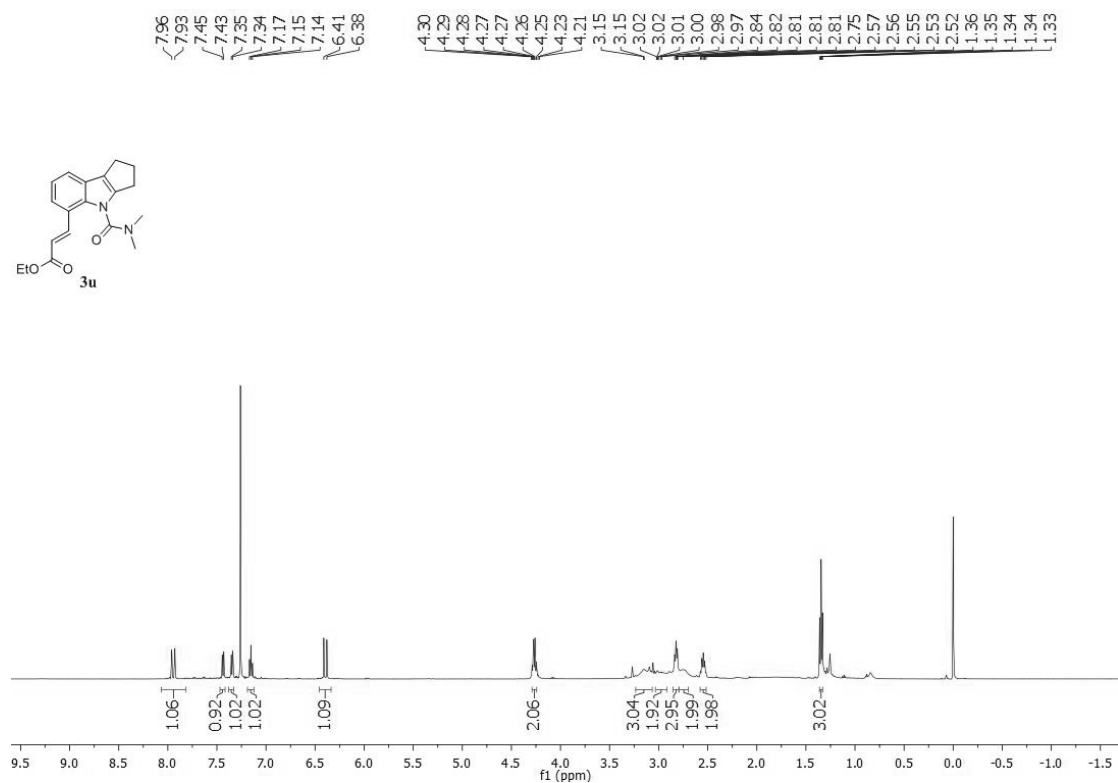

### <sup>13</sup>C NMR spectra of compound **3u**

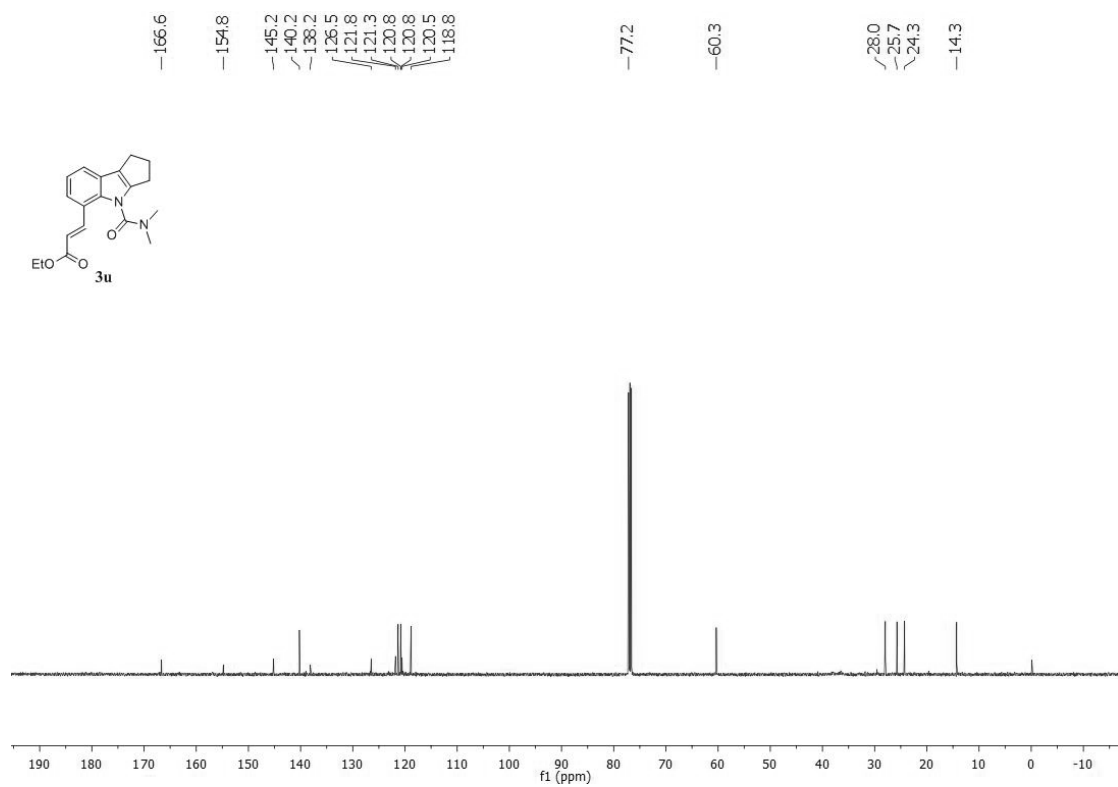

## HRMS spectrum of compound **3u**

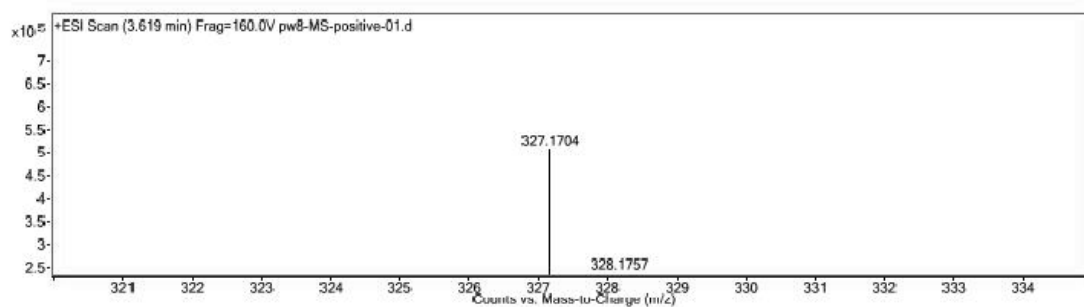

### Elemental Composition Calculator

|                                                               |                                       |                     |                  |                 |                    |
|---------------------------------------------------------------|---------------------------------------|---------------------|------------------|-----------------|--------------------|
| <b>Target m/z:</b>                                            | 327.1704                              | <b>Result type:</b> | Positive ions    | <b>Species:</b> | [M+H] <sup>+</sup> |
| <b>Elements:</b>                                              | C (0-80); H (0-120); O (0-30); N(0-5) |                     |                  |                 |                    |
| <b>Ion Formula</b>                                            | <b>Calculated m/z</b>                 |                     | <b>PPM Error</b> |                 |                    |
| C <sub>19</sub> H <sub>23</sub> N <sub>2</sub> O <sub>3</sub> | 327.1703                              |                     | -0.32            |                 |                    |

### <sup>1</sup>H NMR spectra of compound **3v**

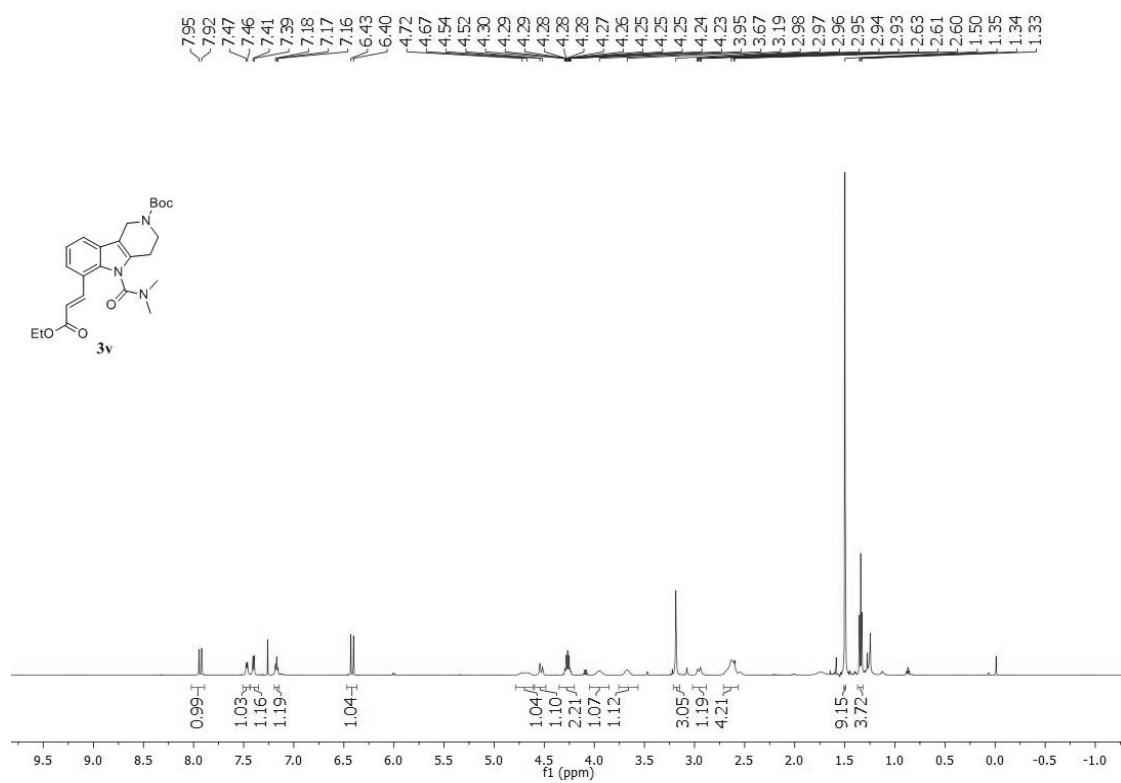

### <sup>13</sup>C NMR spectra of compound **3v**

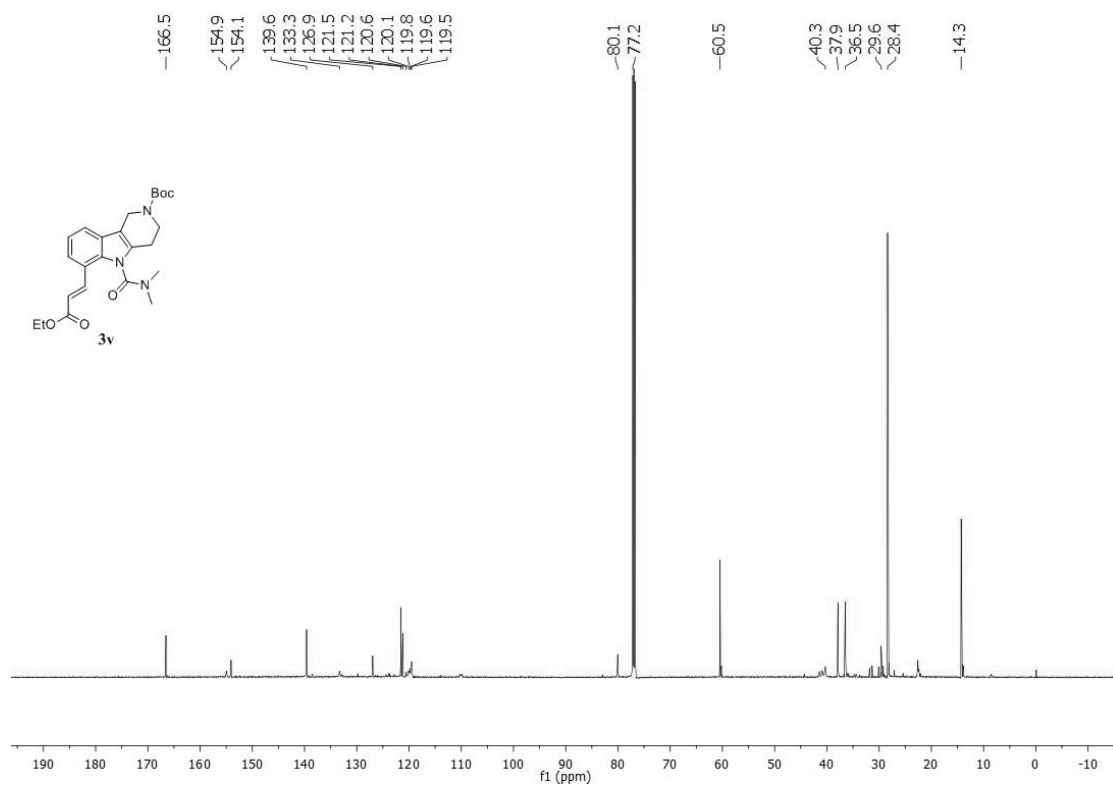

## HRMS spectrum of compound **3v**

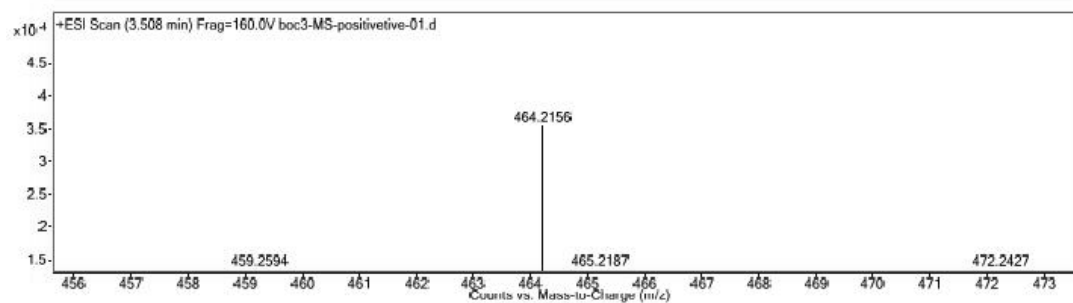

### Elemental Composition Calculator

|                                                                 |                                                 |                     |                  |                 |                     |
|-----------------------------------------------------------------|-------------------------------------------------|---------------------|------------------|-----------------|---------------------|
| <b>Target m/z:</b>                                              | 464.2156                                        | <b>Result type:</b> | Positive ions    | <b>Species:</b> | [M+Na] <sup>+</sup> |
| <b>Elements:</b>                                                | C (0-80); H (0-120); O (0-30); N(0-5); Na (0-5) |                     |                  |                 |                     |
| <b>Ion Formula</b>                                              | <b>Calculated m/z</b>                           |                     | <b>PPM Error</b> |                 |                     |
| C <sub>24</sub> H <sub>31</sub> N <sub>3</sub> NaO <sub>5</sub> | 464.2156                                        |                     | -0.07            |                 |                     |

### $^1\text{H}$ NMR spectra of compound **3w**

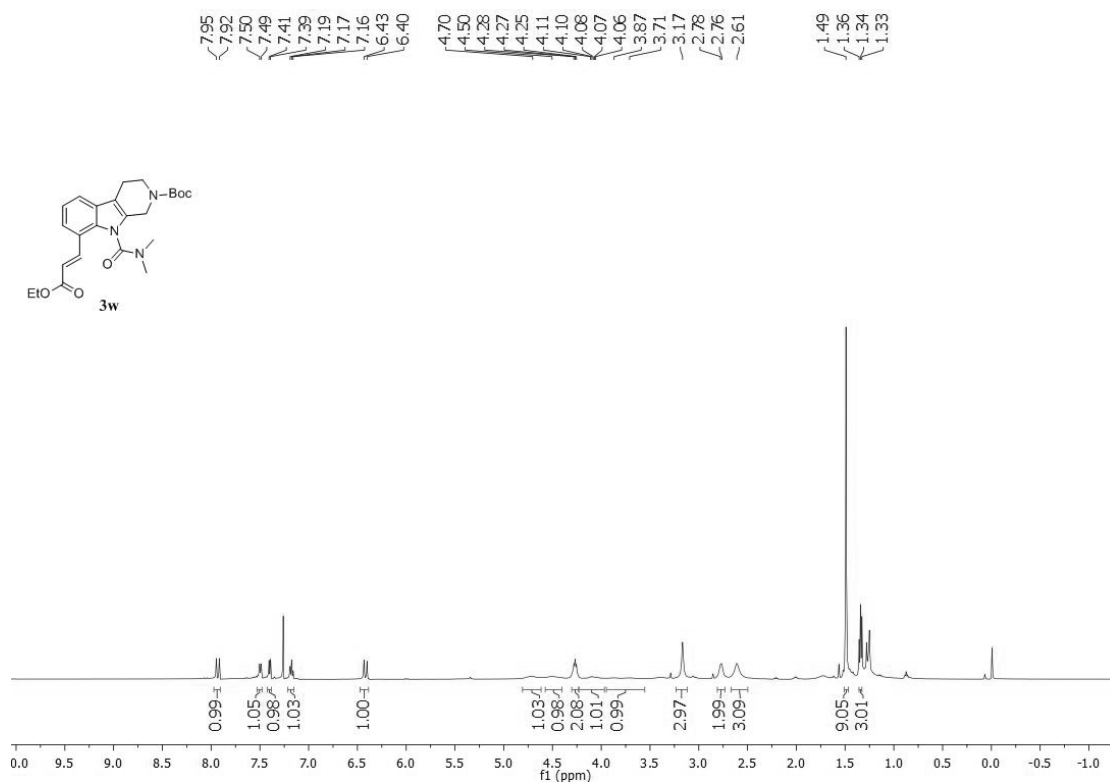

### $^{13}\text{C}$ NMR spectra of compound **3w**

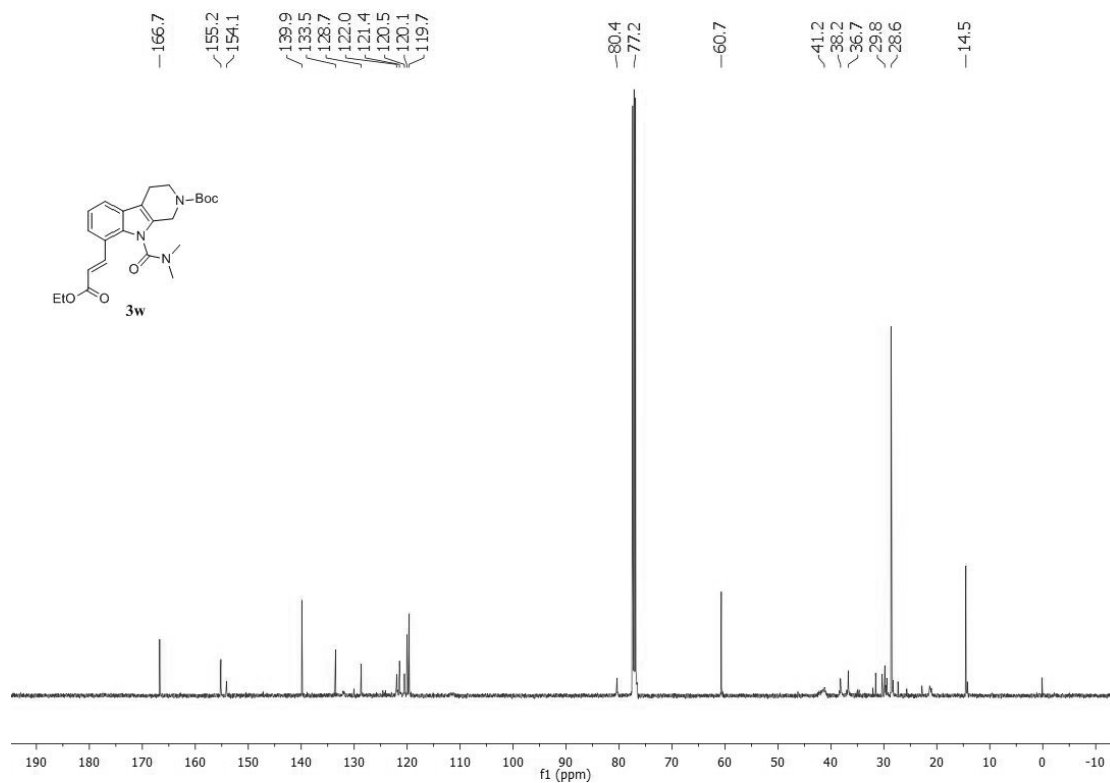

## HRMS spectrum of compound **3w**

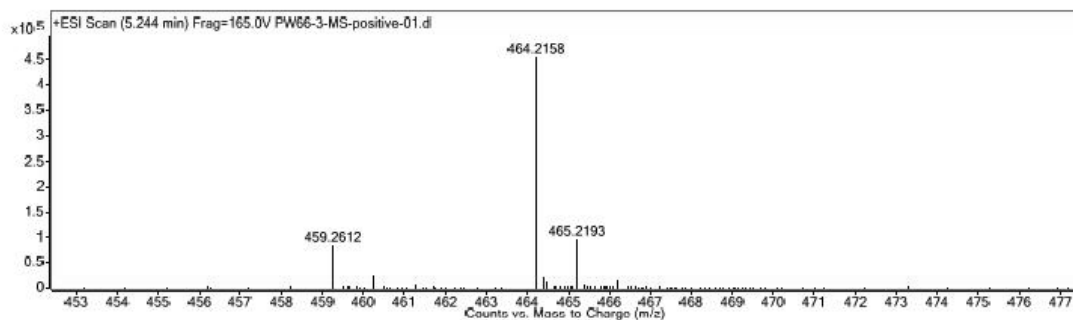

### Elemental Composition Calculator

|                                                                 |                                                 |                     |                  |                 |                     |
|-----------------------------------------------------------------|-------------------------------------------------|---------------------|------------------|-----------------|---------------------|
| <b>Target m/z:</b>                                              | 464.2158                                        | <b>Result type:</b> | Positive ions    | <b>Species:</b> | [M+Na] <sup>+</sup> |
| <b>Elements:</b>                                                | C (0-80); H (0-120); O (0-30); N(0-5); Na (0-5) |                     |                  |                 |                     |
| <b>Ion Formula</b>                                              | <b>Calculated m/z</b>                           |                     | <b>PPM Error</b> |                 |                     |
| C <sub>24</sub> H <sub>31</sub> N <sub>3</sub> NaO <sub>5</sub> | 464.2156                                        |                     | -0.44            |                 |                     |



### <sup>1</sup>H NMR spectra of compound **3x**

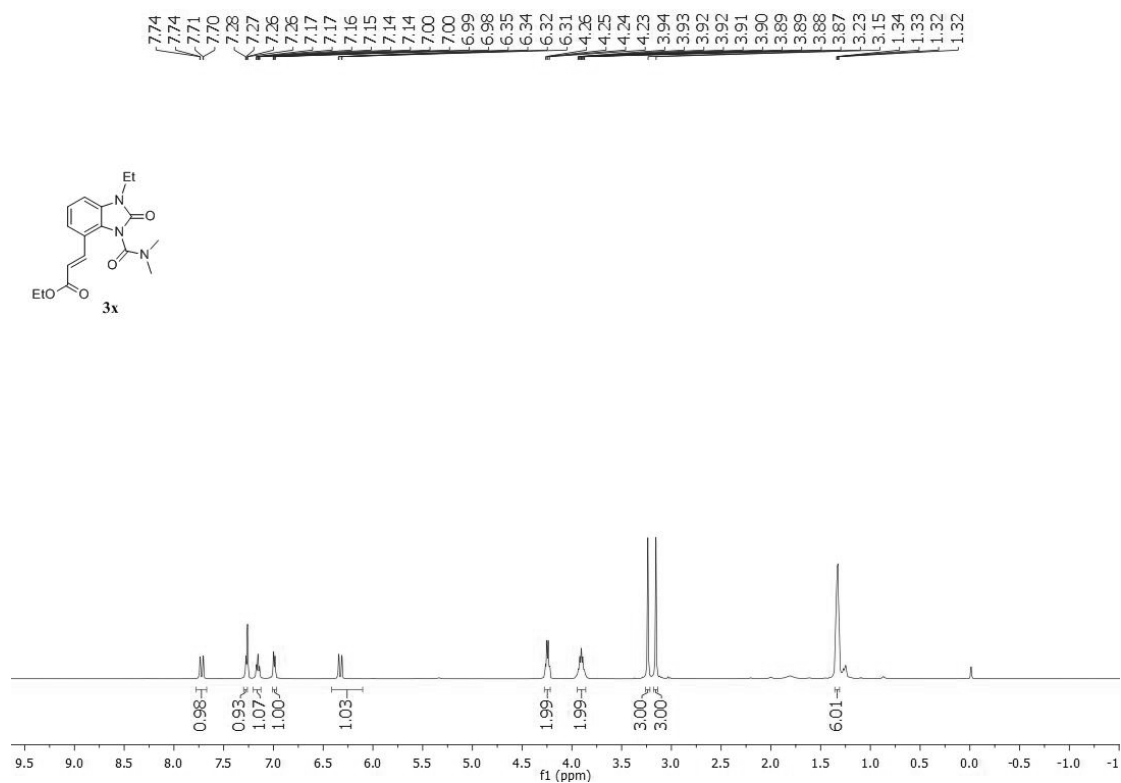

### <sup>13</sup>C NMR spectra of compound **3x**

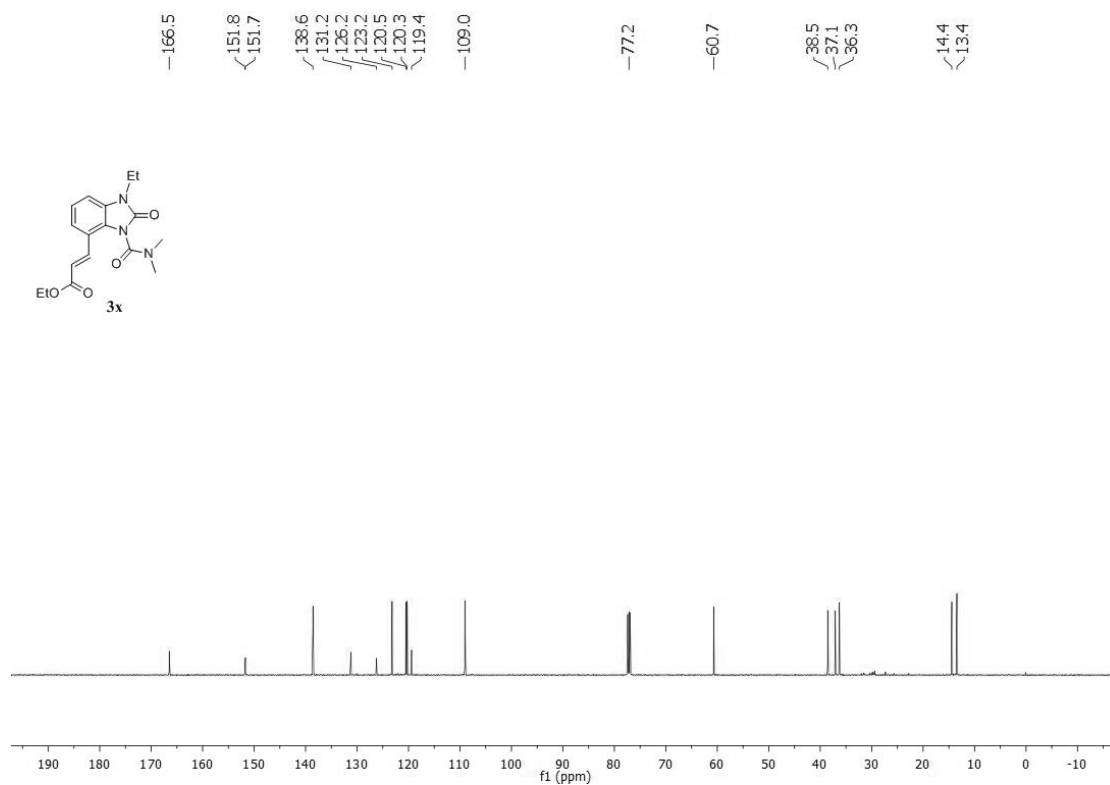

## HRMS spectrum of compound **3x**

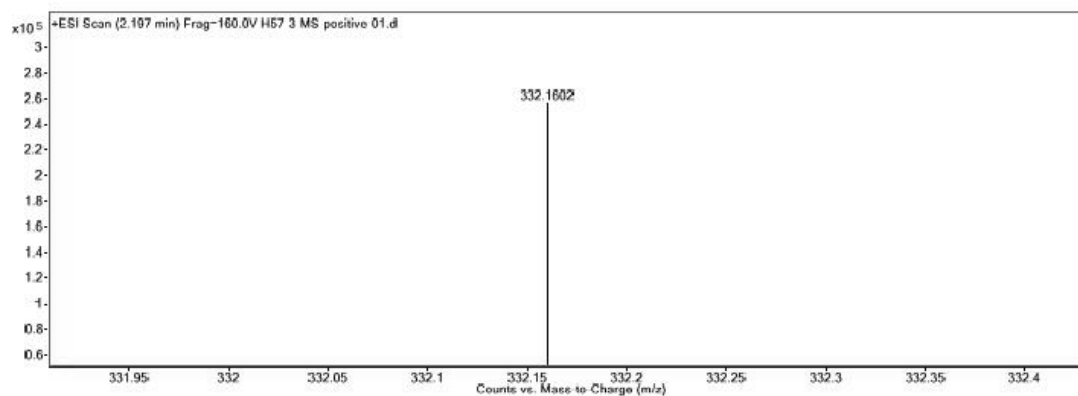

### Elemental Composition Calculator

|                                                               |                                        |                     |                  |                 |                    |
|---------------------------------------------------------------|----------------------------------------|---------------------|------------------|-----------------|--------------------|
| <b>Target m/z:</b>                                            | 332.1602                               | <b>Result type:</b> | Positive ions    | <b>Species:</b> | [M+H] <sup>+</sup> |
| <b>Elements:</b>                                              | C (0-80); H (0-120); O (0-30) ; N(0-5) |                     |                  |                 |                    |
| <b>Ion Formula</b>                                            | <b>Calculated m/z</b>                  |                     | <b>PPM Error</b> |                 |                    |
| C <sub>17</sub> H <sub>22</sub> N <sub>3</sub> O <sub>4</sub> | 332.1605                               |                     | 0.88             |                 |                    |

### <sup>1</sup>H NMR spectra of compound **3y**

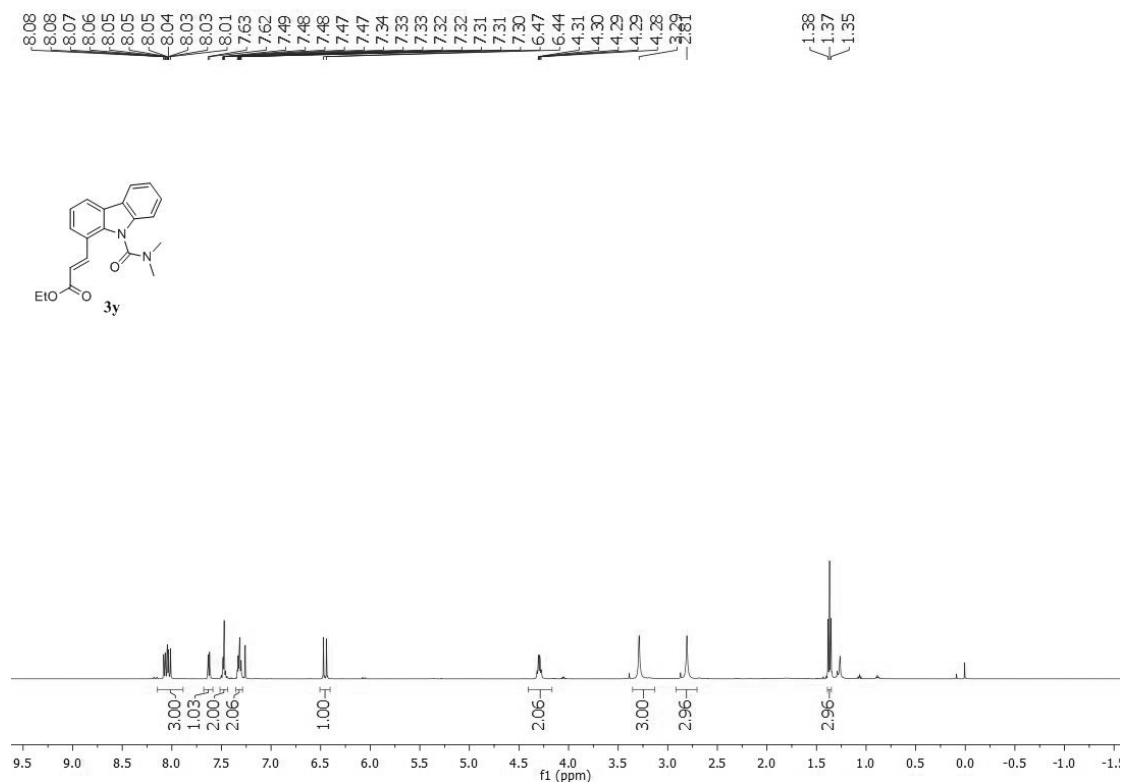

### <sup>13</sup>C NMR spectra of compound **3y**

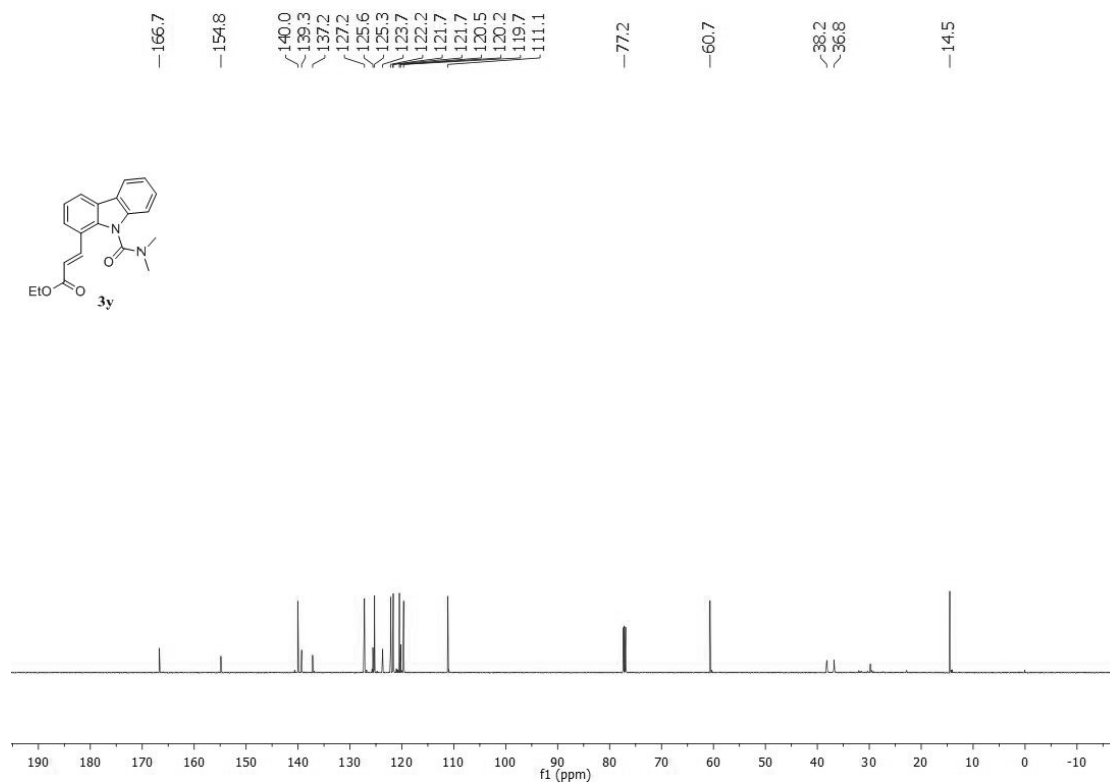

## HRMS spectrum of compound **3y**

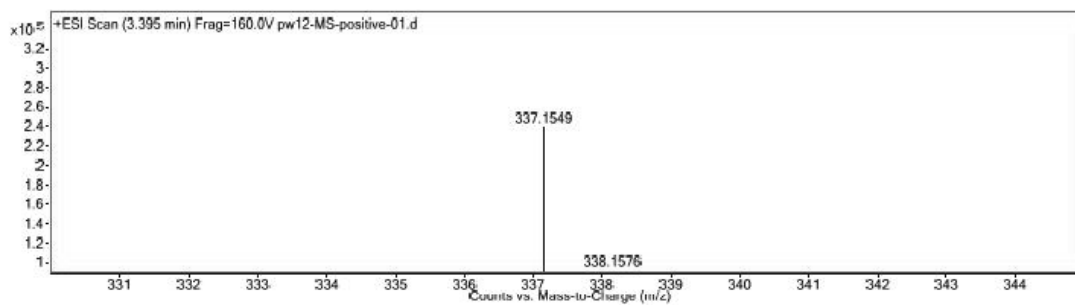

### Elemental Composition Calculator

|                                                               |                                        |                     |                  |                 |                    |
|---------------------------------------------------------------|----------------------------------------|---------------------|------------------|-----------------|--------------------|
| <b>Target m/z:</b>                                            | 337.1549                               | <b>Result type:</b> | Positive ions    | <b>Species:</b> | [M+H] <sup>+</sup> |
| <b>Elements:</b>                                              | C (0-80); H (0-120); O (0-30) ; N(0-5) |                     |                  |                 |                    |
| <b>Ion Formula</b>                                            | <b>Calculated m/z</b>                  |                     | <b>PPM Error</b> |                 |                    |
| C <sub>20</sub> H <sub>21</sub> N <sub>2</sub> O <sub>3</sub> | 337.1547                               |                     | -0.71            |                 |                    |

# <sup>1</sup>H NMR spectra of compound **3aa**

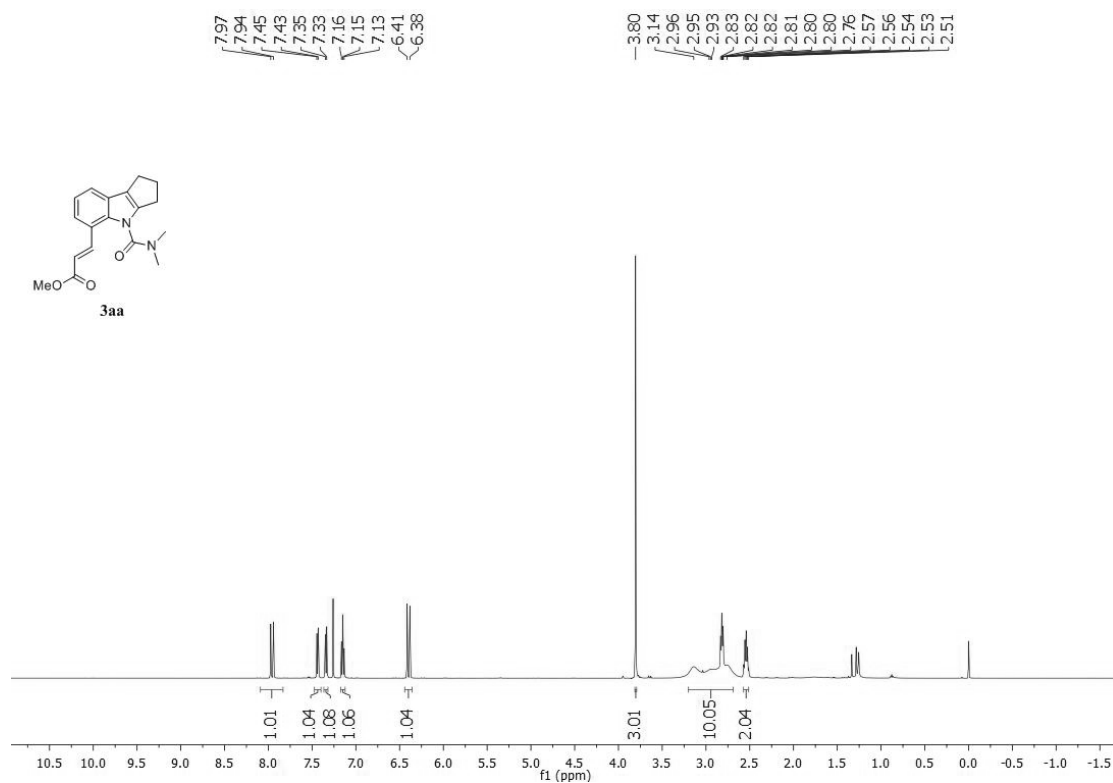

# <sup>13</sup>C NMR spectra of compound **3aa**

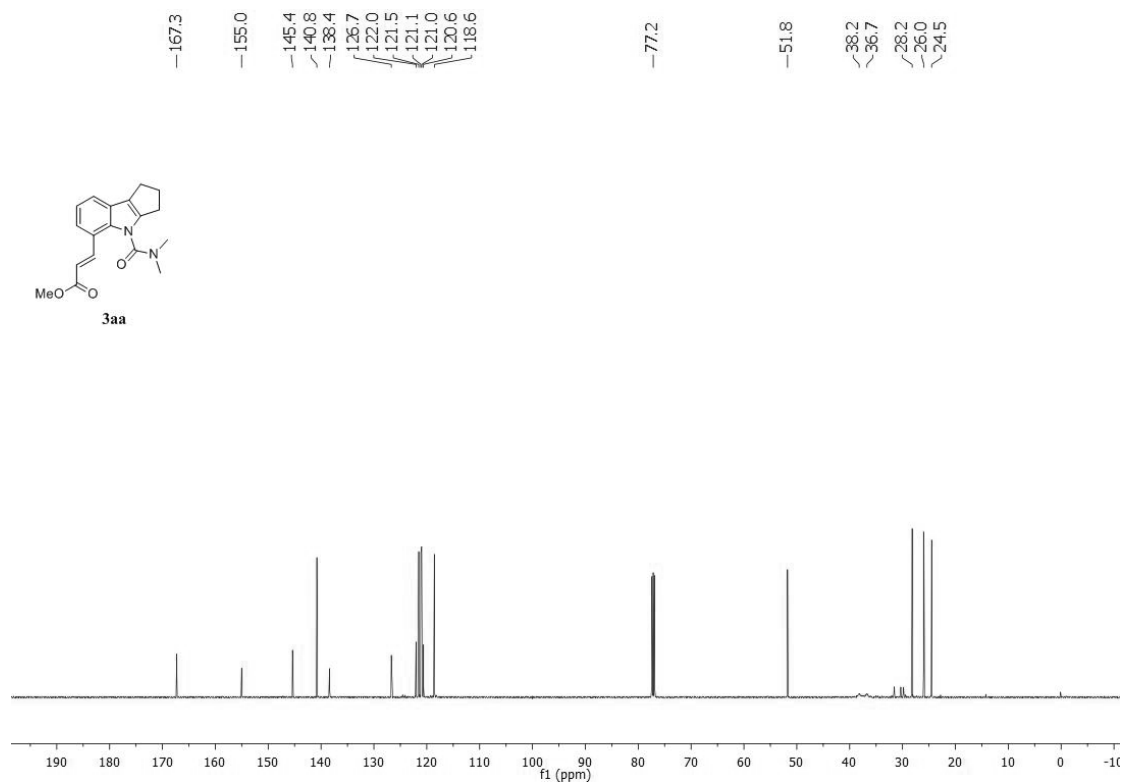

## HRMS spectrum of compound **3aa**

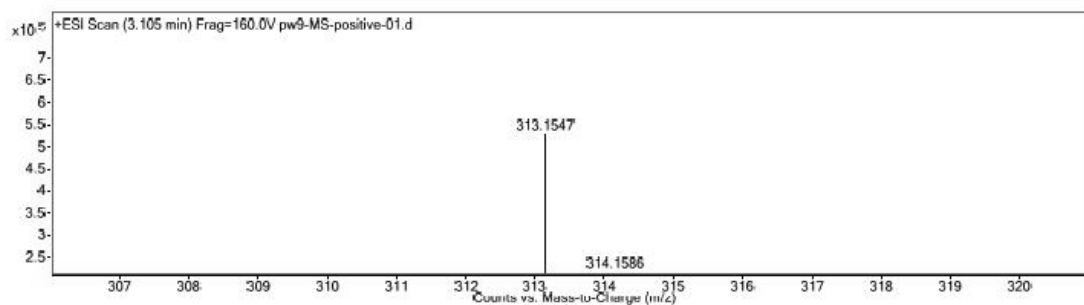

### Elemental Composition Calculator

|                                                               |                                        |                     |                  |                 |                    |
|---------------------------------------------------------------|----------------------------------------|---------------------|------------------|-----------------|--------------------|
| <b>Target m/z:</b>                                            | 313.1547                               | <b>Result type:</b> | Positive ions    | <b>Species:</b> | [M+H] <sup>+</sup> |
| <b>Elements:</b>                                              | C (0-80); H (0-120); O (0-30) ; N(0-5) |                     |                  |                 |                    |
| <b>Ion Formula</b>                                            | <b>Calculated m/z</b>                  |                     | <b>PPM Error</b> |                 |                    |
| C <sub>18</sub> H <sub>21</sub> N <sub>2</sub> O <sub>3</sub> | 313.1547                               |                     | -0.03            |                 |                    |

### <sup>1</sup>H NMR spectra of compound **3ab**

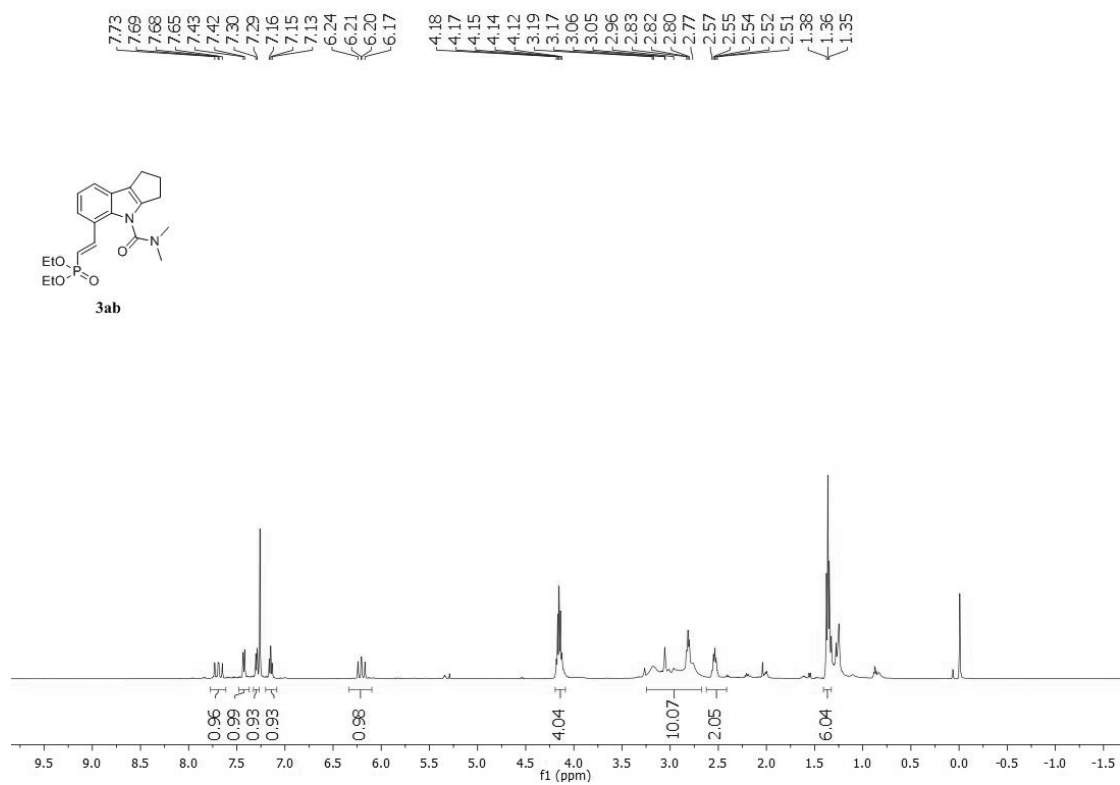

### <sup>13</sup>C NMR spectra of compound **3ab**

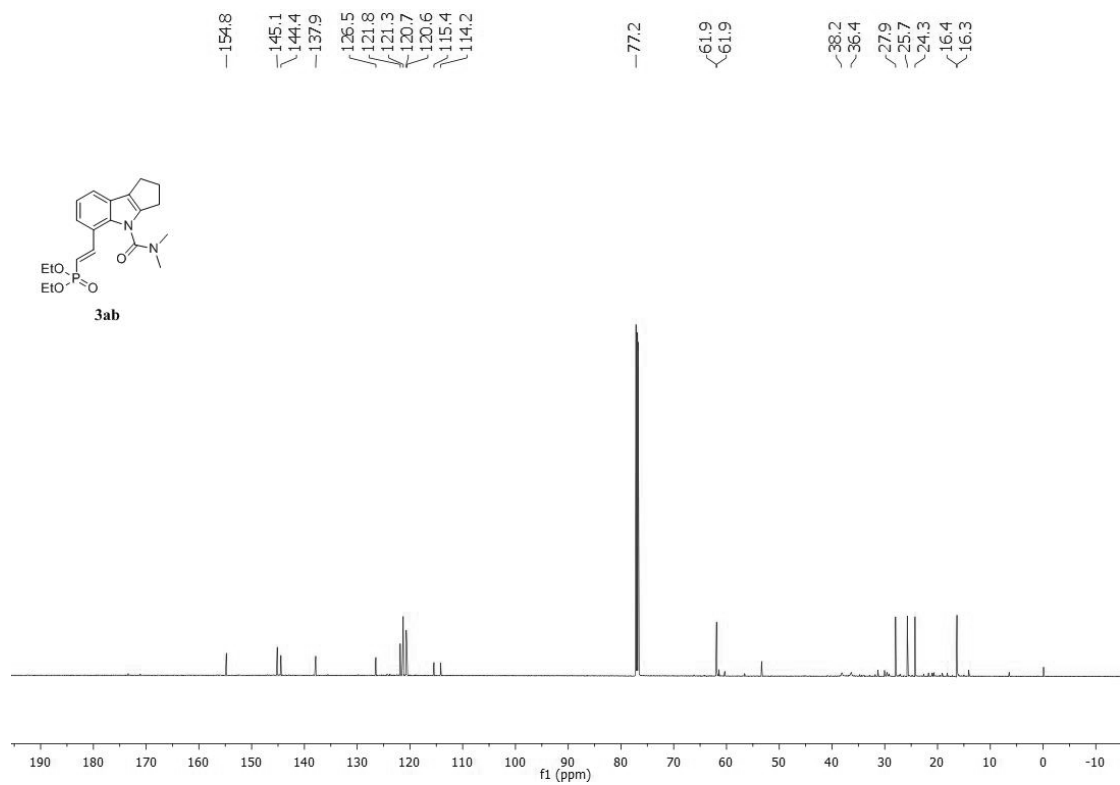

## HRMS spectrum of compound **3ab**

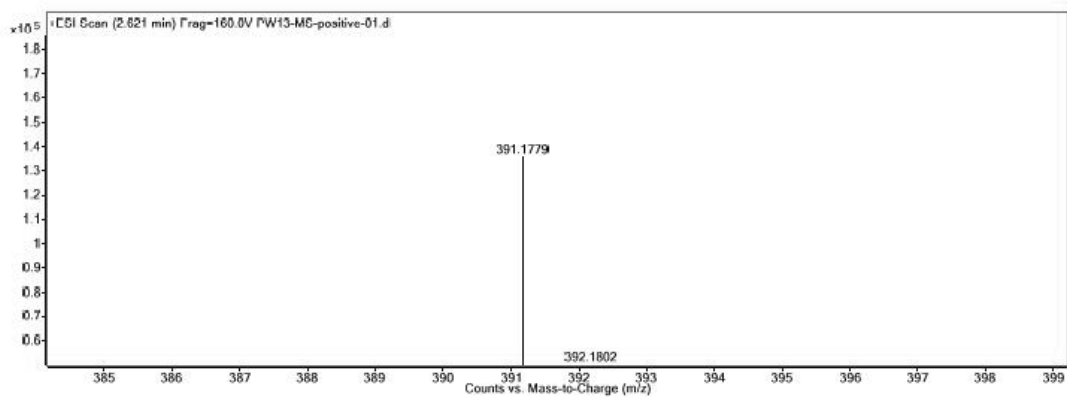

### Elemental Composition Calculator

|                                                                 |                                                 |                     |                  |                 |                    |
|-----------------------------------------------------------------|-------------------------------------------------|---------------------|------------------|-----------------|--------------------|
| <b>Target m/z:</b>                                              | 391.1779                                        | <b>Result type:</b> | Positive ions    | <b>Species:</b> | [M+H] <sup>+</sup> |
| <b>Elements:</b>                                                | C (0-80); H (0-120); O (0-30) ; N(0-5) ; P(0-5) |                     |                  |                 |                    |
| <b>Ion Formula</b>                                              | <b>Calculated m/z</b>                           |                     | <b>PPM Error</b> |                 |                    |
| C <sub>20</sub> H <sub>28</sub> N <sub>2</sub> O <sub>4</sub> P | 391.1776                                        |                     | 0.67             |                 |                    |



### <sup>1</sup>H NMR spectra of compound **3ac**

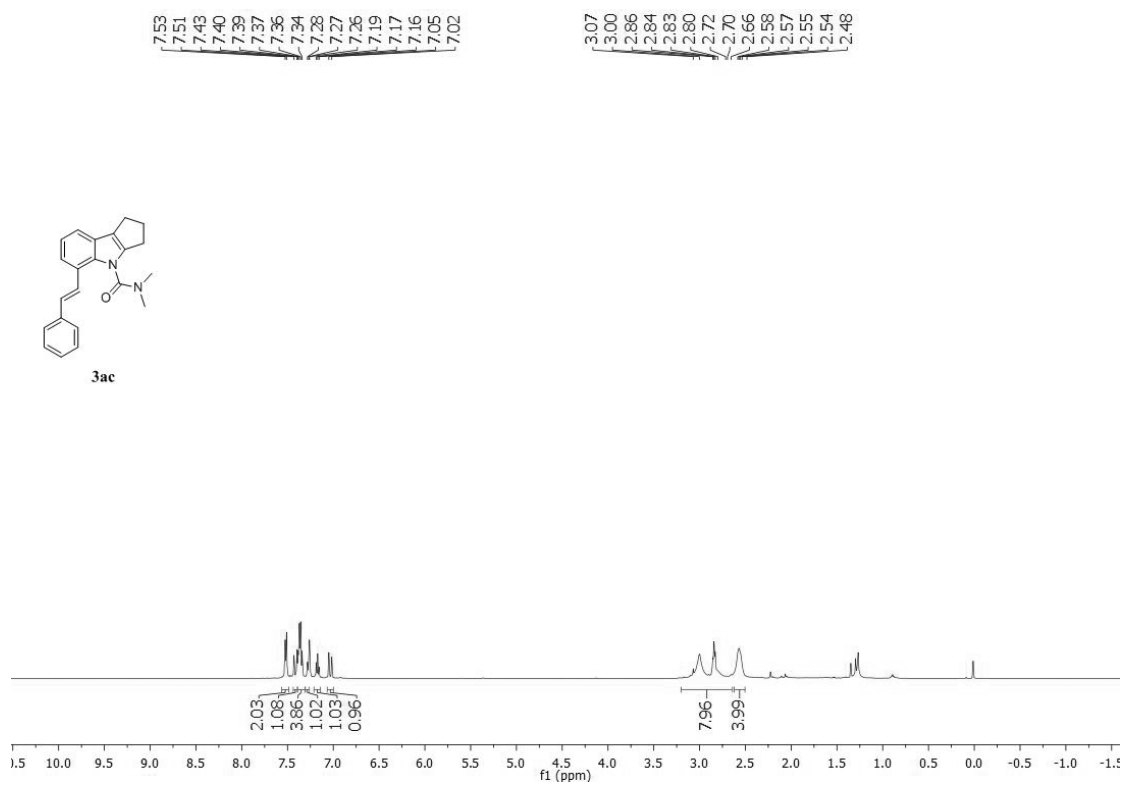

### <sup>13</sup>C NMR spectra of compound **3ac**

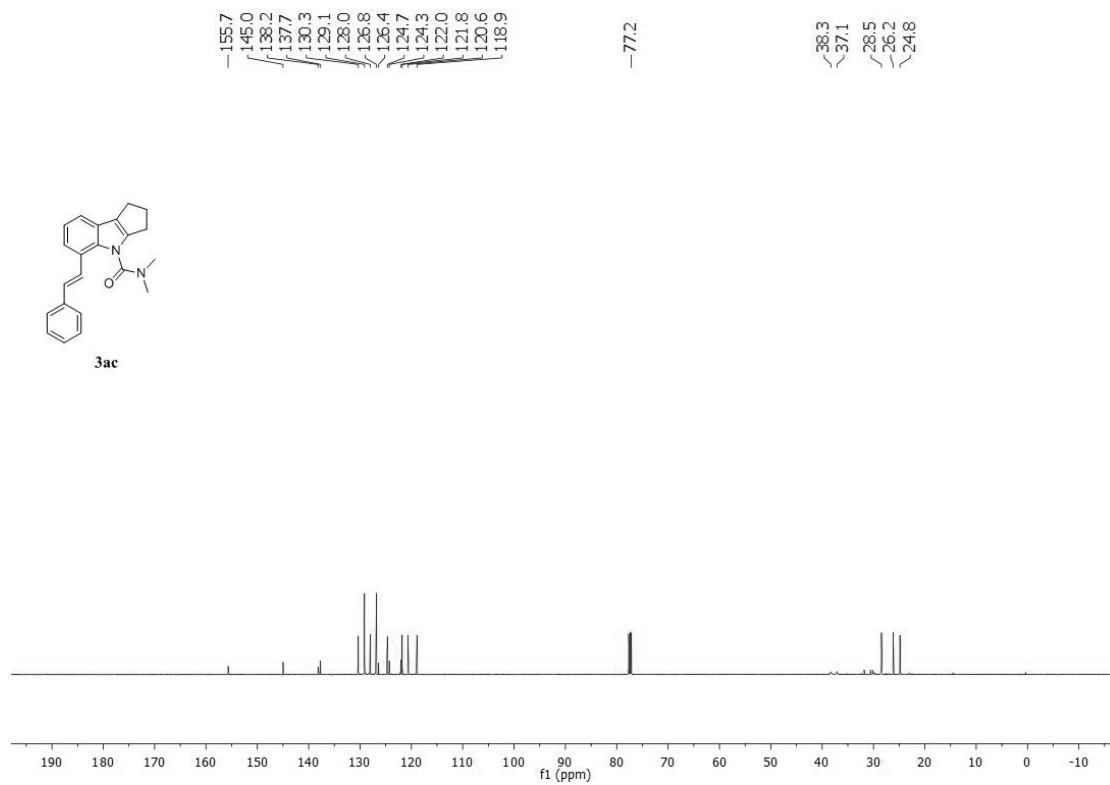

## HRMS spectrum of compound **3ac**

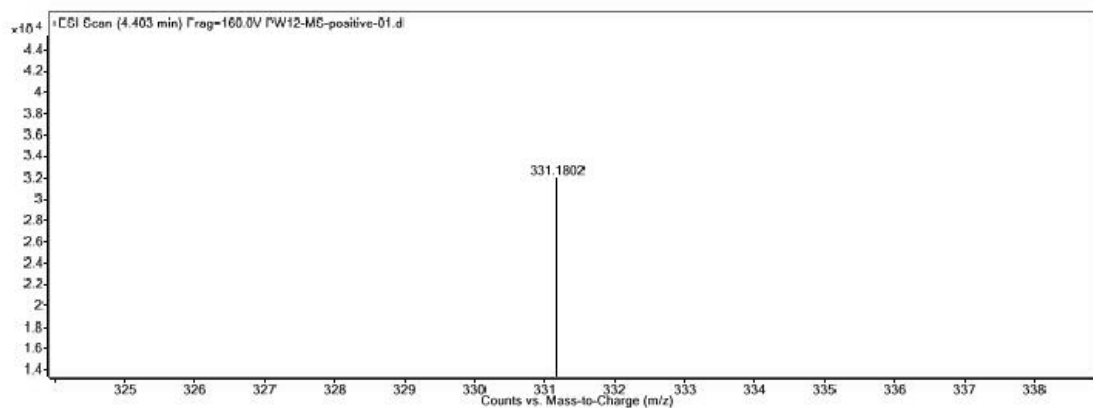

### Elemental Composition Calculator

|                                                  |                                       |                     |                  |                 |                    |
|--------------------------------------------------|---------------------------------------|---------------------|------------------|-----------------|--------------------|
| <b>Target m/z:</b>                               | 331.1082                              | <b>Result type:</b> | Positive ions    | <b>Species:</b> | [M+H] <sup>+</sup> |
| <b>Elements:</b>                                 | C (0-80); H (0-120); O (0-30); N(0-5) |                     |                  |                 |                    |
| <b>Ion Formula</b>                               | <b>Calculated m/z</b>                 |                     | <b>PPM Error</b> |                 |                    |
| C <sub>22</sub> H <sub>23</sub> N <sub>2</sub> O | 331.1085                              |                     | 0.92             |                 |                    |

### <sup>1</sup>H NMR spectra of compound **3ad**

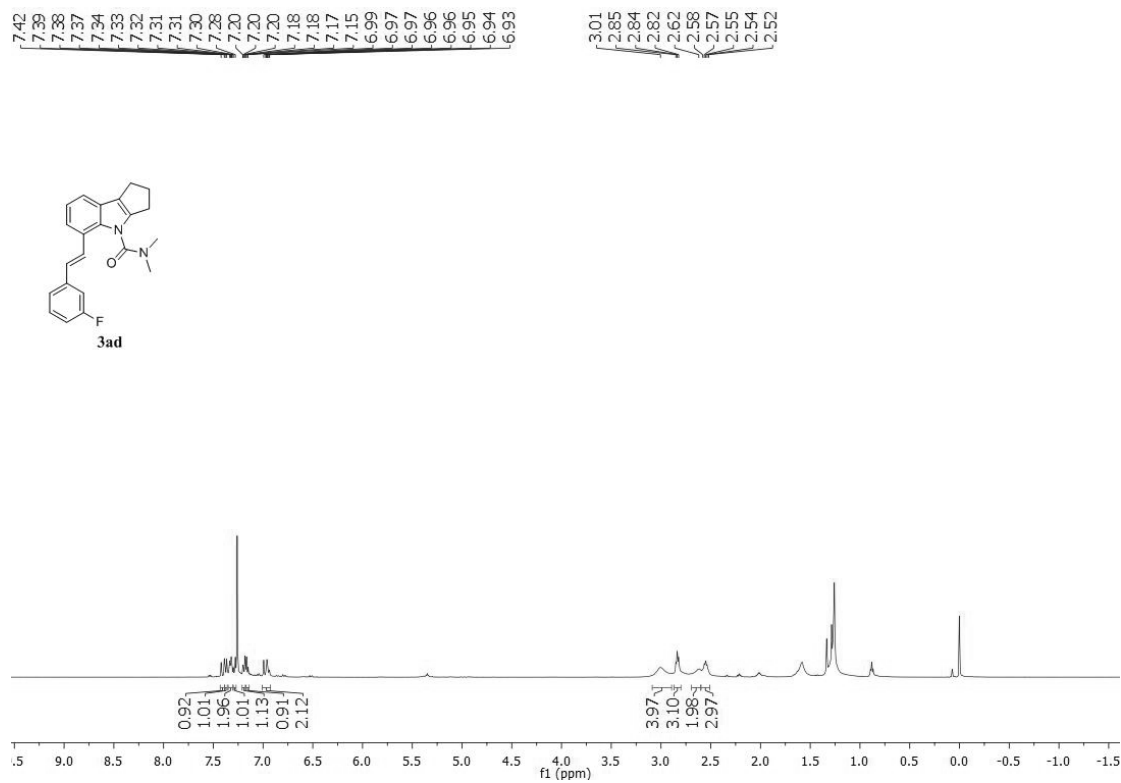

### <sup>13</sup>C NMR spectra of compound **3ad**

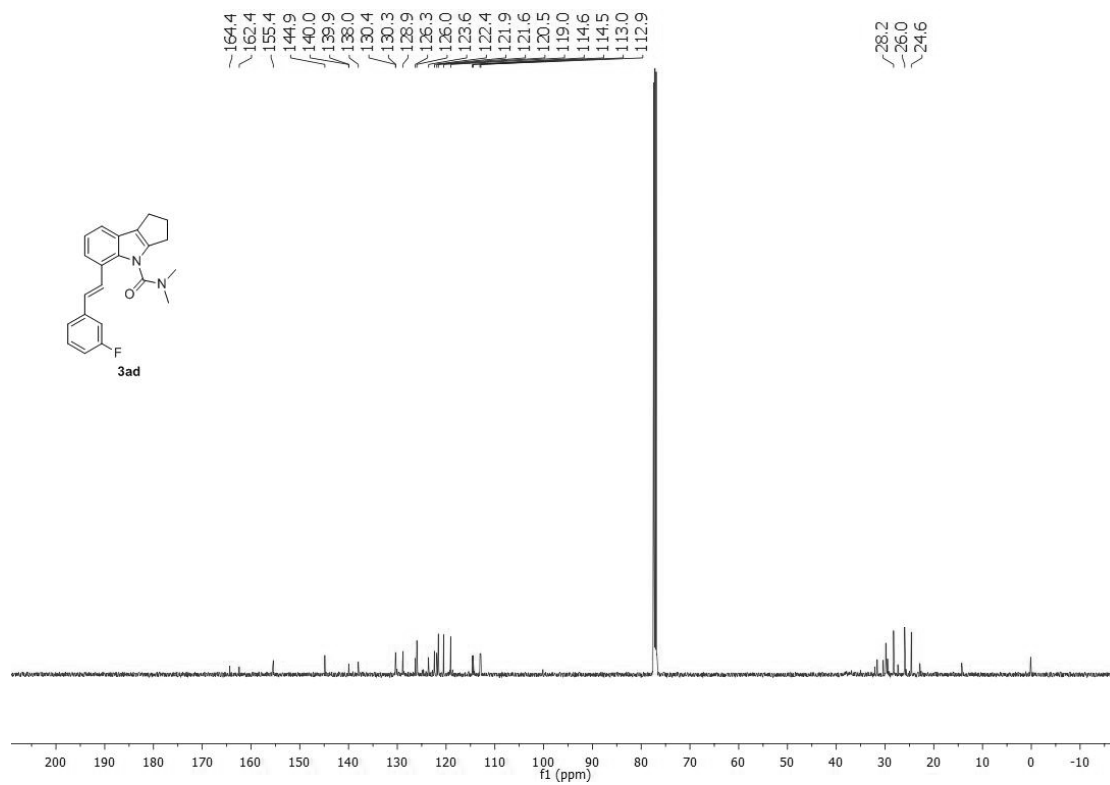

## <sup>19</sup>F NMR spectra of compound **3ad**

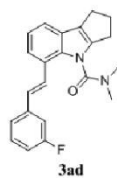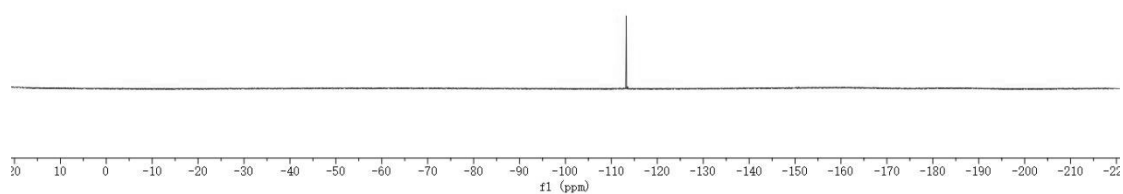

## HRMS spectrum of compound **3ad**

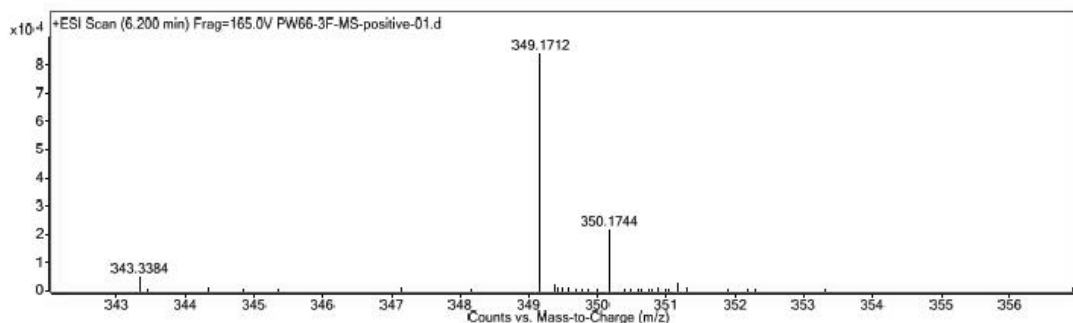

### Elemental Composition Calculator

|                                                   |                                               |                     |                  |                 |                    |
|---------------------------------------------------|-----------------------------------------------|---------------------|------------------|-----------------|--------------------|
| <b>Target m/z:</b>                                | 349.1712                                      | <b>Result type:</b> | Positive ions    | <b>Species:</b> | [M+H] <sup>+</sup> |
| <b>Elements:</b>                                  | C (0-80); H (0-120); O (0-30); N(0-5); F(0-5) |                     |                  |                 |                    |
| <b>Ion Formula</b>                                | <b>Calculated m/z</b>                         |                     | <b>PPM Error</b> |                 |                    |
| C <sub>22</sub> H <sub>22</sub> FN <sub>2</sub> O | 349.1711                                      |                     | -0.44            |                 |                    |

<sup>1</sup>H NMR spectra of compound **3ae**

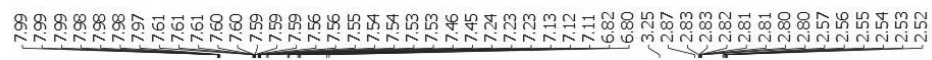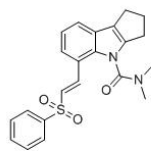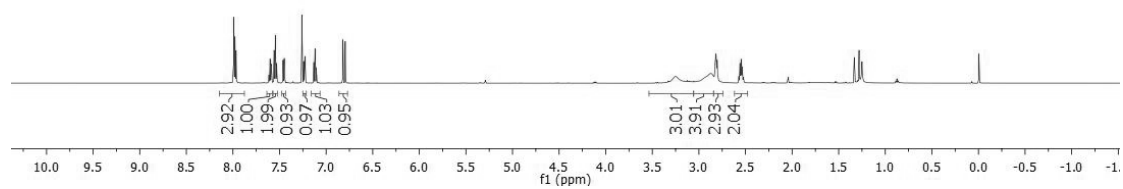

<sup>13</sup>C NMR spectra of compound **3ae**

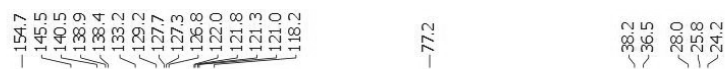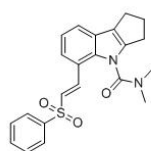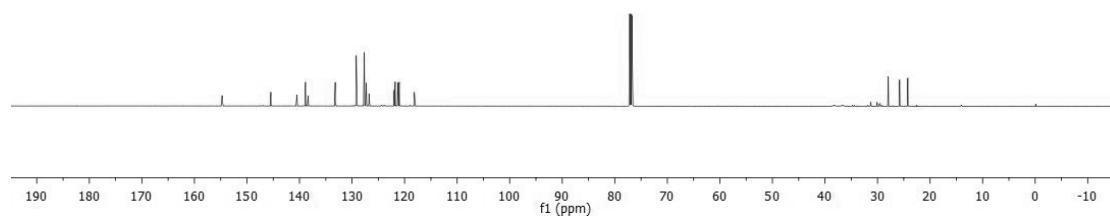

## HRMS spectrum of compound **3ae**

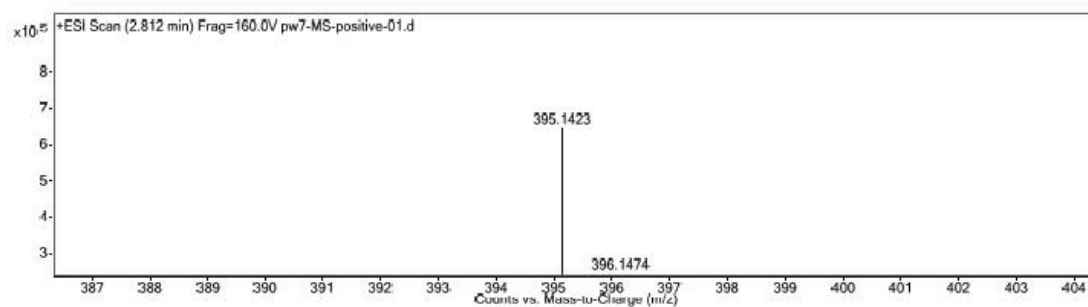

### Elemental Composition Calculator

|                                                                 |                                               |                     |                  |                 |           |
|-----------------------------------------------------------------|-----------------------------------------------|---------------------|------------------|-----------------|-----------|
| <b>Target m/z:</b>                                              | 395.1423                                      | <b>Result type:</b> | Positive ions    | <b>Species:</b> | $[M+H]^+$ |
| <b>Elements:</b>                                                | C (0-80); H (0-120); O (0-30); N(0-5); S(0-5) |                     |                  |                 |           |
| <b>Ion Formula</b>                                              | <b>Calculated m/z</b>                         |                     | <b>PPM Error</b> |                 |           |
| C <sub>22</sub> H <sub>23</sub> N <sub>2</sub> O <sub>3</sub> S | 395.1424                                      |                     | 0.16             |                 |           |

# <sup>1</sup>H NMR spectra of compound **3af**

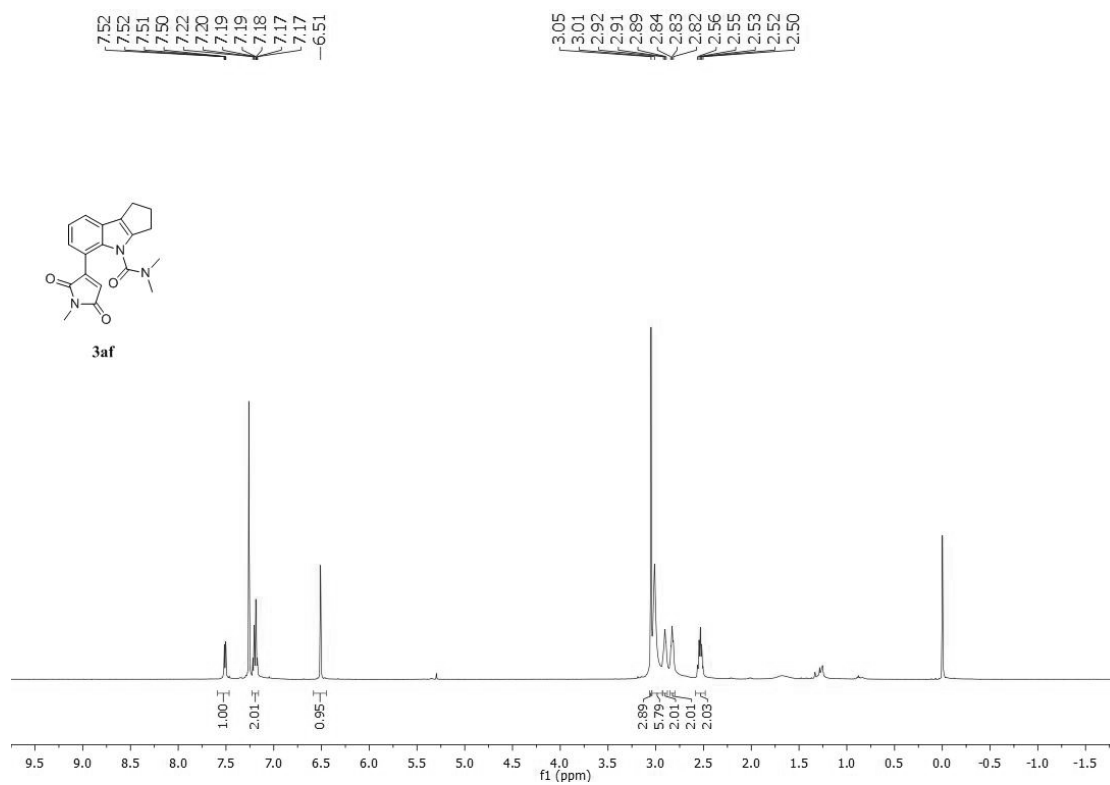

# <sup>13</sup>C NMR spectra of compound **3af**

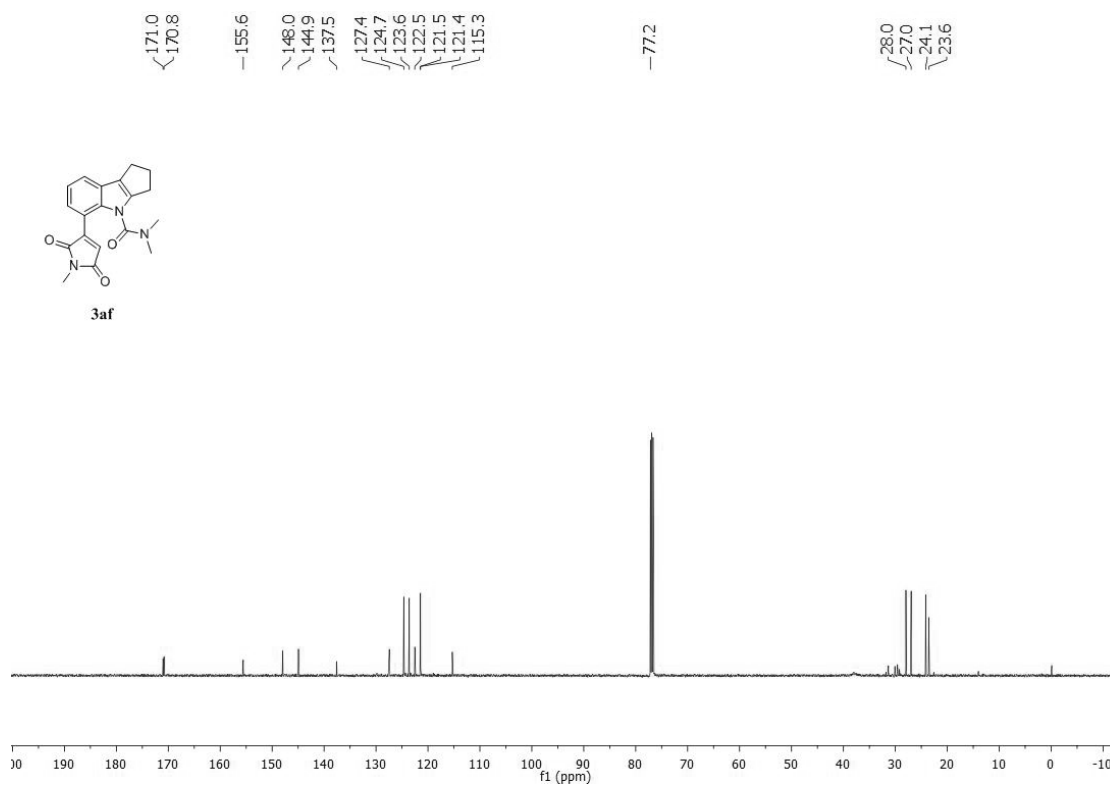

## HRMS spectrum of compound **3af**

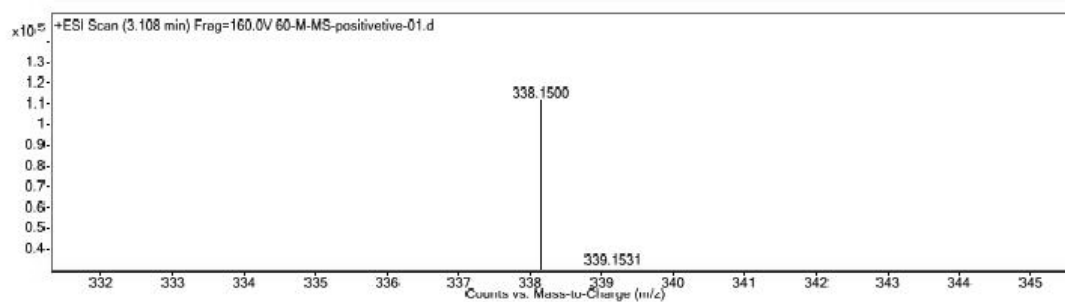

### Elemental Composition Calculator

|                                                               |                                       |                     |                  |                 |                    |
|---------------------------------------------------------------|---------------------------------------|---------------------|------------------|-----------------|--------------------|
| <b>Target <math>m/z</math>:</b>                               | 338.1500                              | <b>Result type:</b> | Positive ions    | <b>Species:</b> | [M+H] <sup>+</sup> |
| <b>Elements:</b>                                              | C (0-80); H (0-120); O (0-30); N(0-5) |                     |                  |                 |                    |
| <b>Ion Formula</b>                                            | <b>Calculated <math>m/z</math></b>    |                     | <b>PPM Error</b> |                 |                    |
| C <sub>19</sub> H <sub>20</sub> N <sub>3</sub> O <sub>3</sub> | 338.1499                              |                     | -0.22            |                 |                    |



### <sup>1</sup>H NMR spectra of compound **4a**

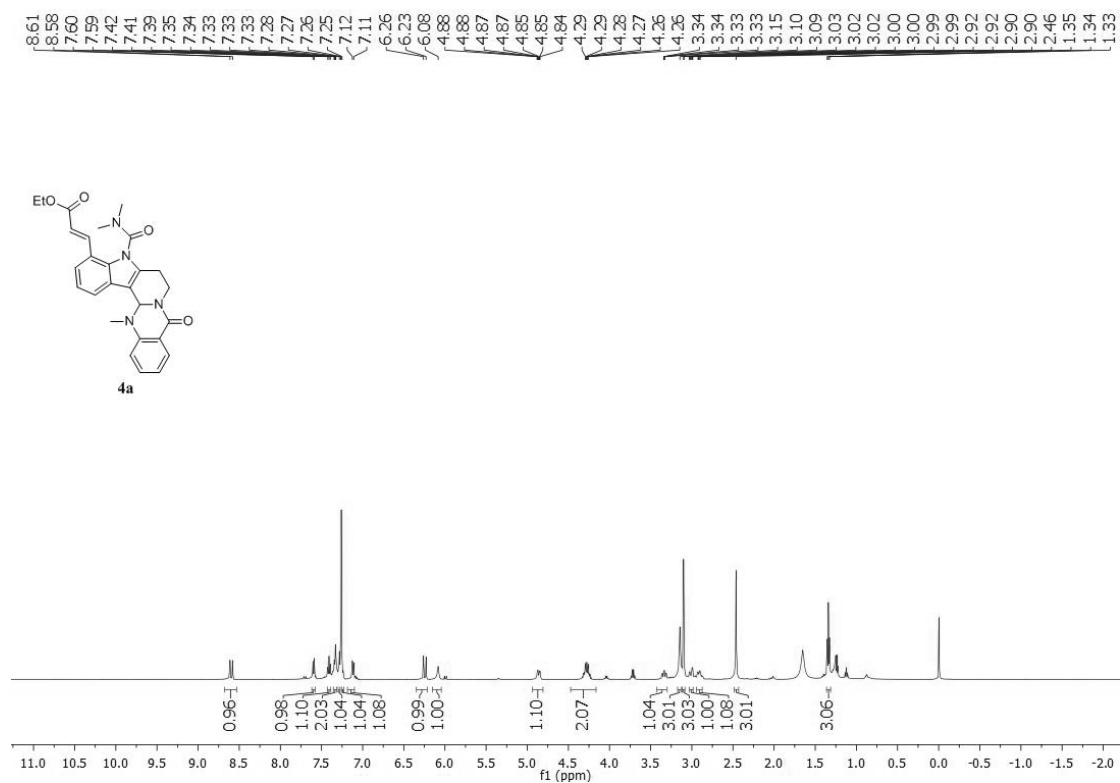

### <sup>13</sup>C NMR spectra of compound **4a**

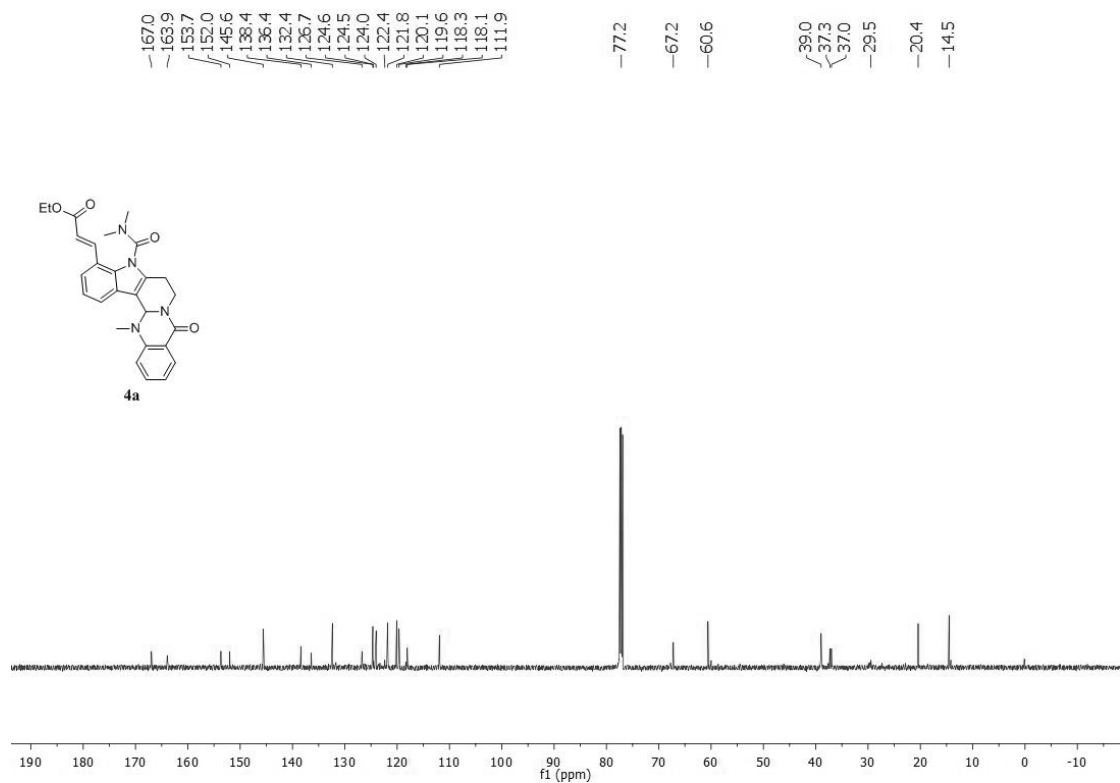

## HRMS spectrum of compound 4a

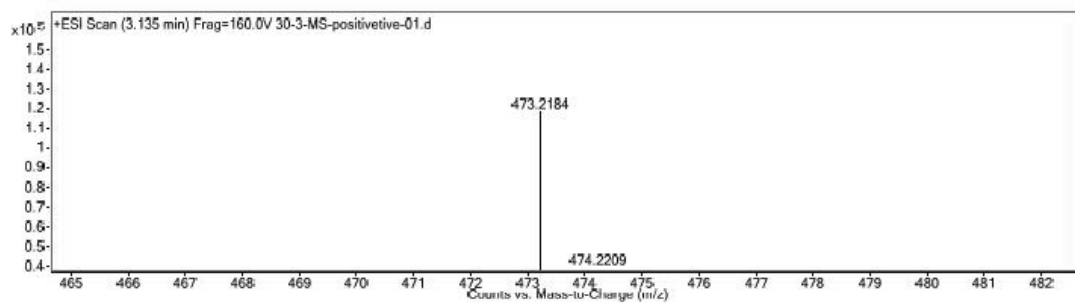

### Elemental Composition Calculator

|                    |                                        |                     |                  |                 |                    |
|--------------------|----------------------------------------|---------------------|------------------|-----------------|--------------------|
| <b>Target m/z:</b> | 473.2184                               | <b>Result type:</b> | Positive ions    | <b>Species:</b> | [M+H] <sup>+</sup> |
| <b>Elements:</b>   | C (0-80); H (0-120); O (0-30) ; N(0-5) |                     |                  |                 |                    |
| <b>Ion Formula</b> | <b>Calculated m/z</b>                  |                     | <b>PPM Error</b> |                 |                    |
| C27H29N4O4         | 473.2183                               |                     | -0.25            |                 |                    |

### <sup>1</sup>H NMR spectra of compound **4b**

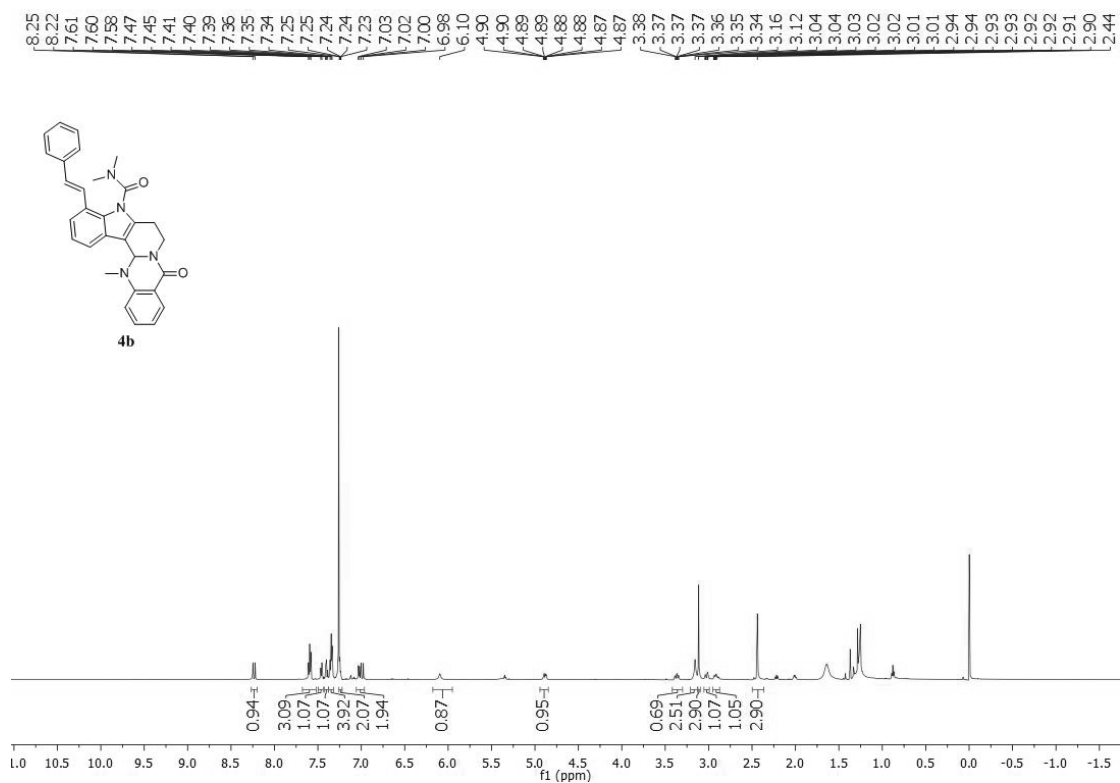

### <sup>13</sup>C NMR spectra of compound **4b**

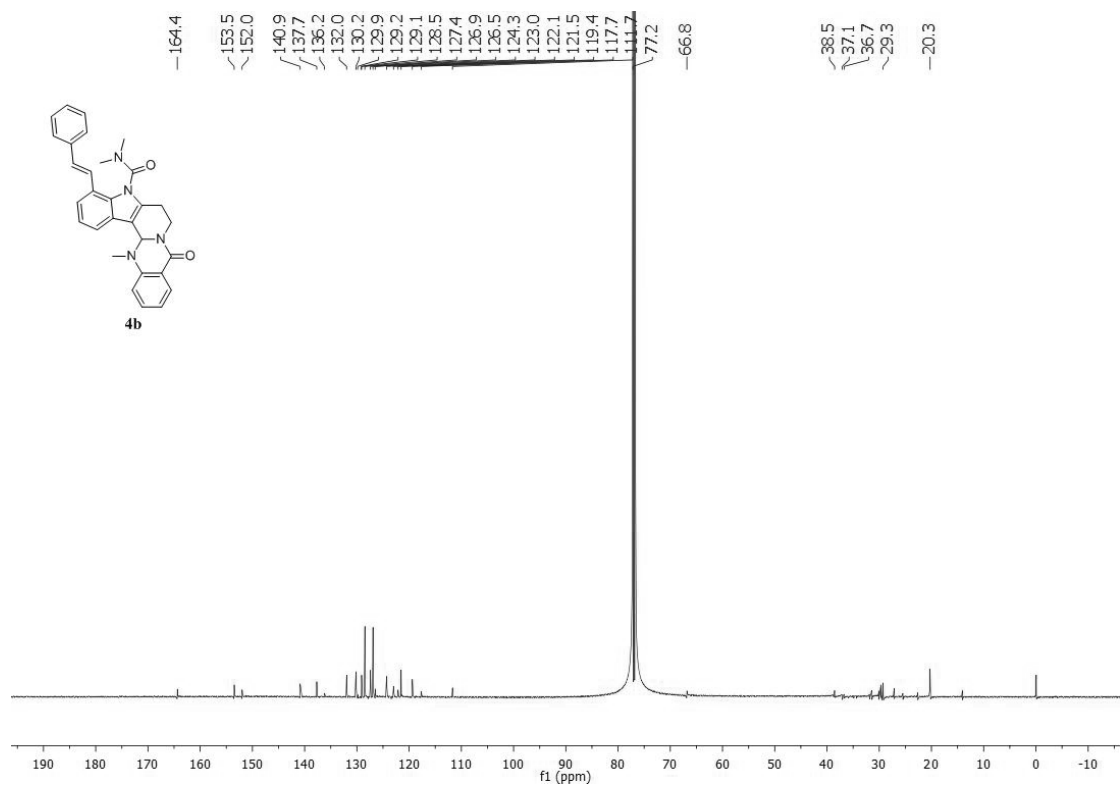

## HRMS spectrum of compound **4b**

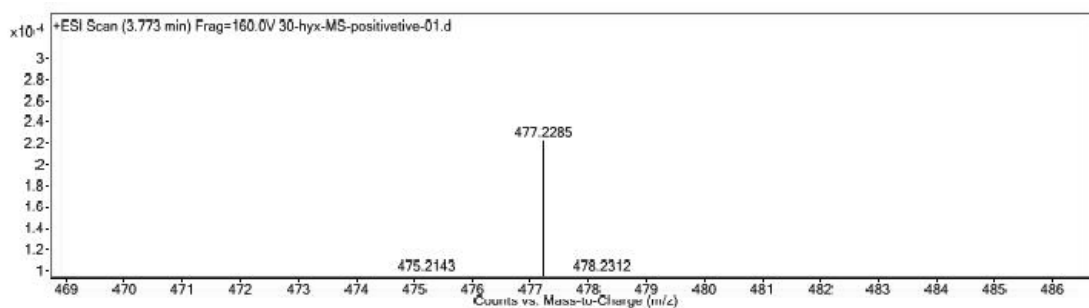

### Elemental Composition Calculator

|                                                               |                                       |                     |                  |                 |                    |
|---------------------------------------------------------------|---------------------------------------|---------------------|------------------|-----------------|--------------------|
| <b>Target m/z:</b>                                            | 477.2285                              | <b>Result type:</b> | Positive ions    | <b>Species:</b> | [M+H] <sup>+</sup> |
| <b>Elements:</b>                                              | C (0-80); H (0-120); O (0-30); N(0-5) |                     |                  |                 |                    |
| <b>Ion Formula</b>                                            | <b>Calculated m/z</b>                 |                     | <b>PPM Error</b> |                 |                    |
| C <sub>30</sub> H <sub>29</sub> N <sub>4</sub> O <sub>2</sub> | 477.2285                              |                     | 0.07             |                 |                    |

### <sup>1</sup>H NMR spectra of compound **4c**

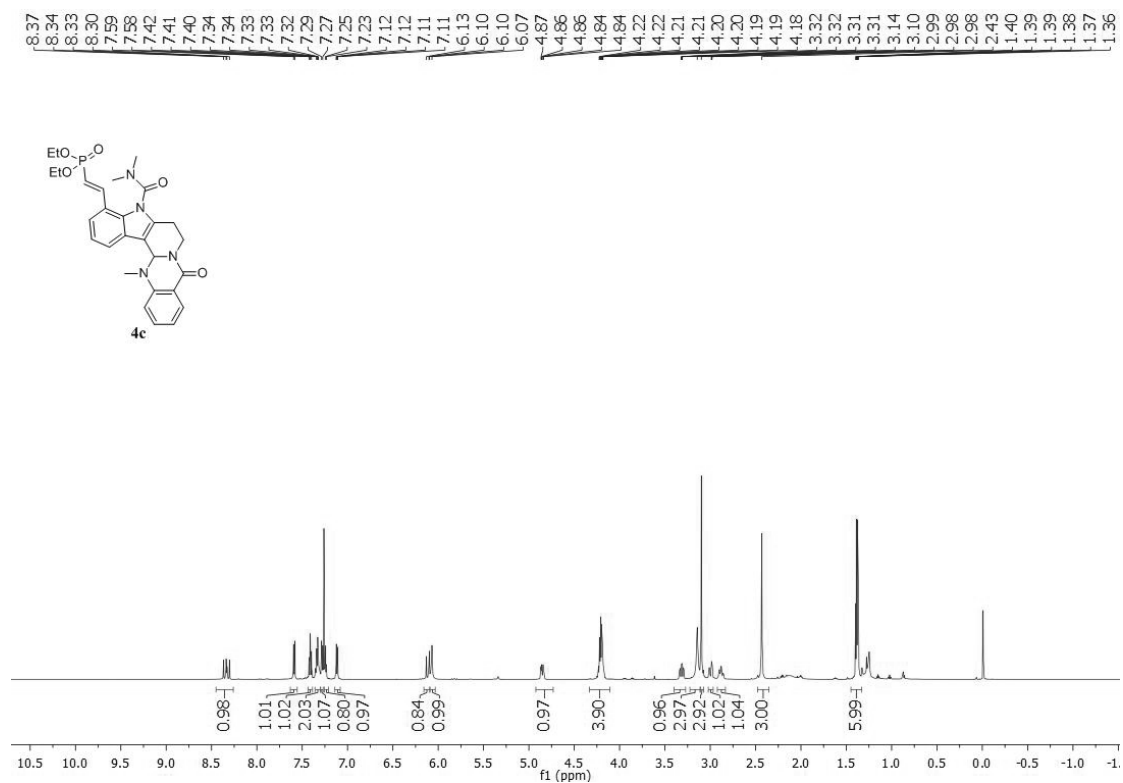

### <sup>13</sup>C NMR spectra of compound **4c**

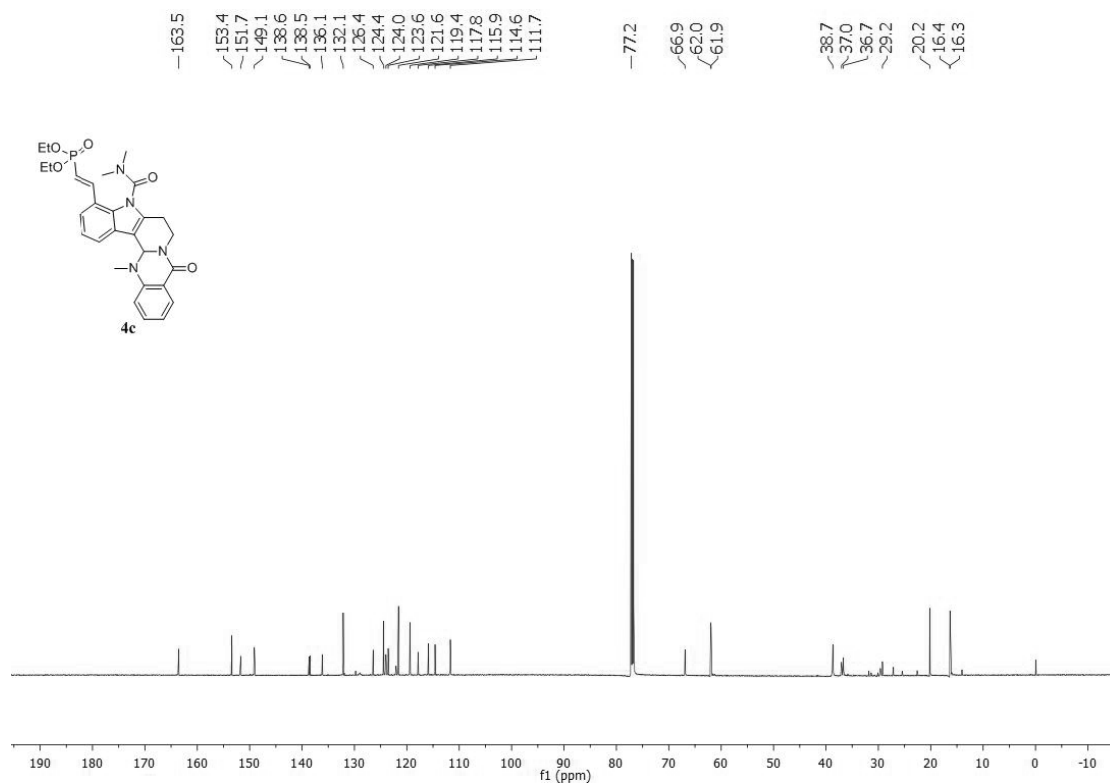

## HRMS spectrum of compound **4c**

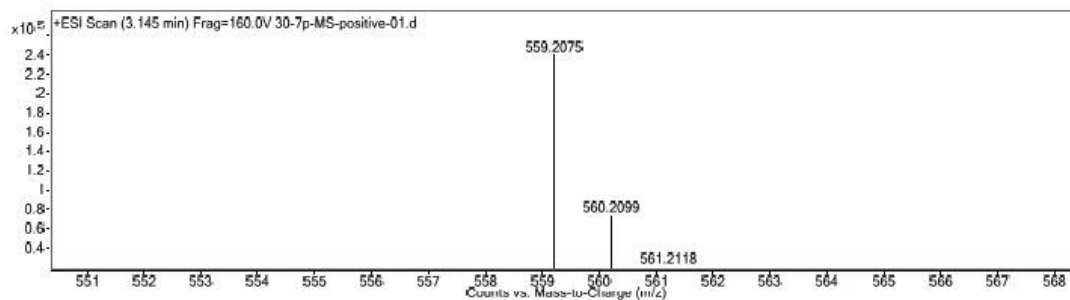

### Elemental Composition Calculator

|                                                                   |                                                           |                     |                  |                 |            |
|-------------------------------------------------------------------|-----------------------------------------------------------|---------------------|------------------|-----------------|------------|
| <b>Target m/z:</b>                                                | 559.2075                                                  | <b>Result type:</b> | Positive ions    | <b>Species:</b> | $[M+Na]^+$ |
| <b>Elements:</b>                                                  | C (0-80); H (0-120); O (0-30); N(0-5); Na (0-5) ; P (0-5) |                     |                  |                 |            |
| <b>Ion Formula</b>                                                | <b>Calculated m/z</b>                                     |                     | <b>PPM Error</b> |                 |            |
| C <sub>28</sub> H <sub>33</sub> N <sub>4</sub> NaO <sub>5</sub> P | 559.2081                                                  |                     | 1.05             |                 |            |

### $^1\text{H}$ NMR spectra of compound **4d**

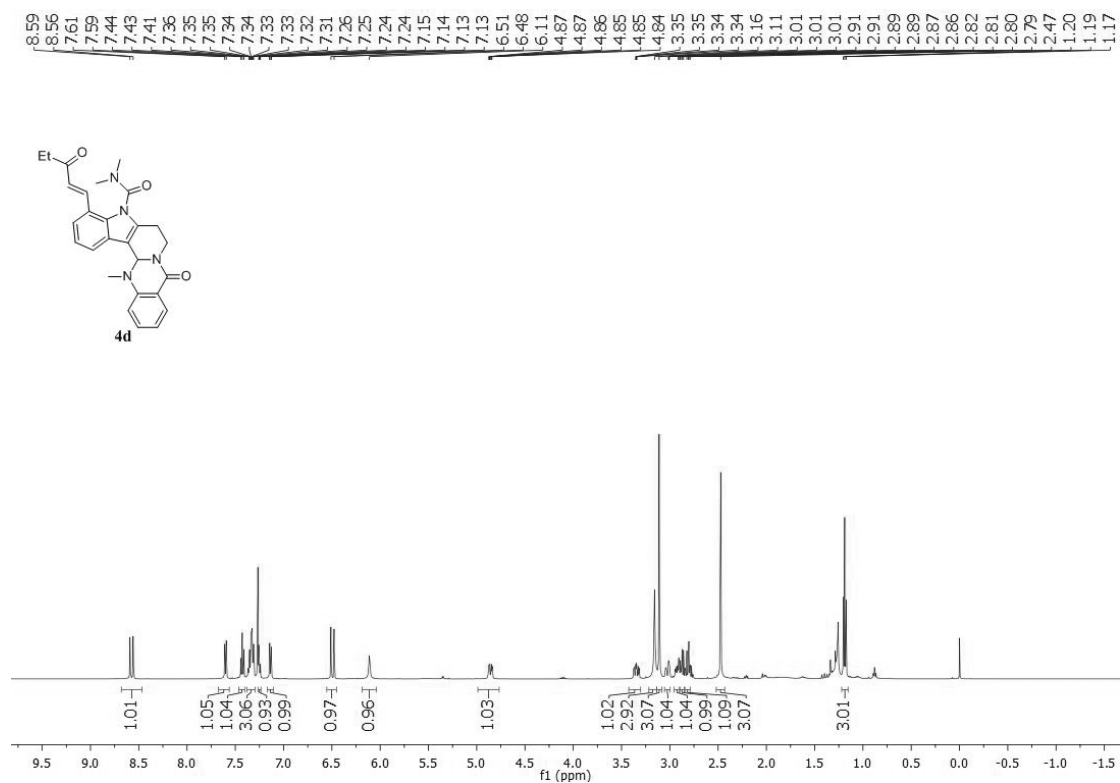

### $^{13}\text{C}$ NMR spectra of compound **4d**

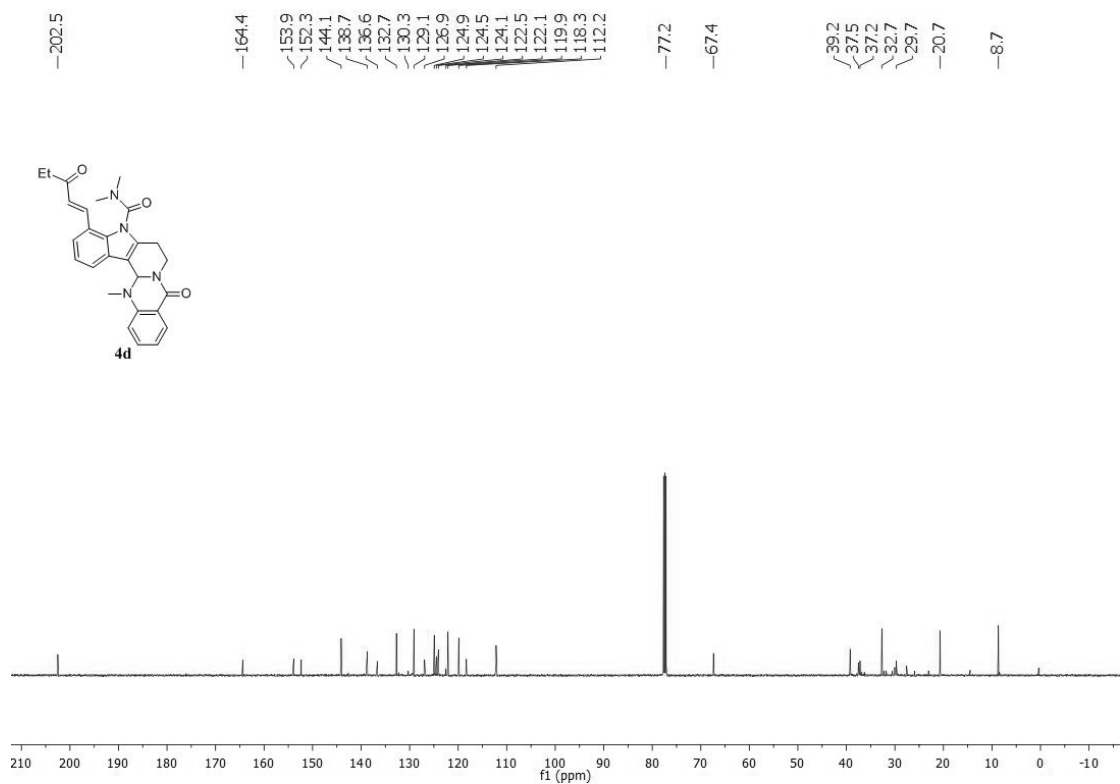

## HRMS spectrum of compound **4d**

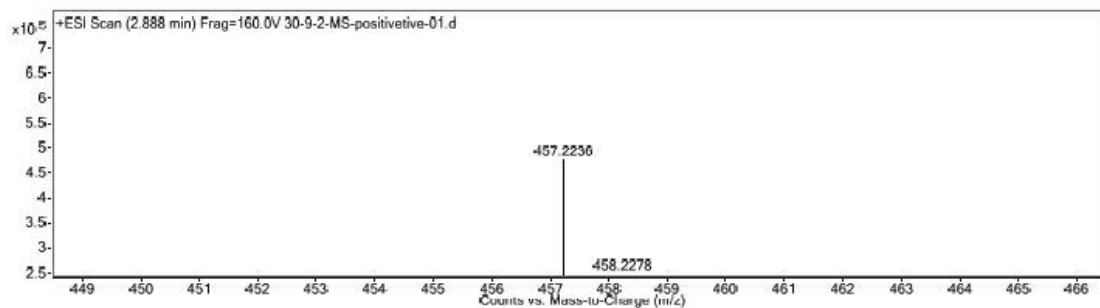

### Elemental Composition Calculator

|                                                               |                                        |                     |                  |                 |                    |
|---------------------------------------------------------------|----------------------------------------|---------------------|------------------|-----------------|--------------------|
| <b>Target m/z:</b>                                            | 457.2236                               | <b>Result type:</b> | Positive ions    | <b>Species:</b> | [M+H] <sup>+</sup> |
| <b>Elements:</b>                                              | C (0-80); H (0-120); O (0-30) ; N(0-5) |                     |                  |                 |                    |
| <b>Ion Formula</b>                                            | <b>Calculated m/z</b>                  |                     | <b>PPM Error</b> |                 |                    |
| C <sub>27</sub> H <sub>29</sub> N <sub>4</sub> O <sub>3</sub> | 457.2234                               |                     | -0.5             |                 |                    |



### $^1\text{H}$ NMR spectra of compound **5a**

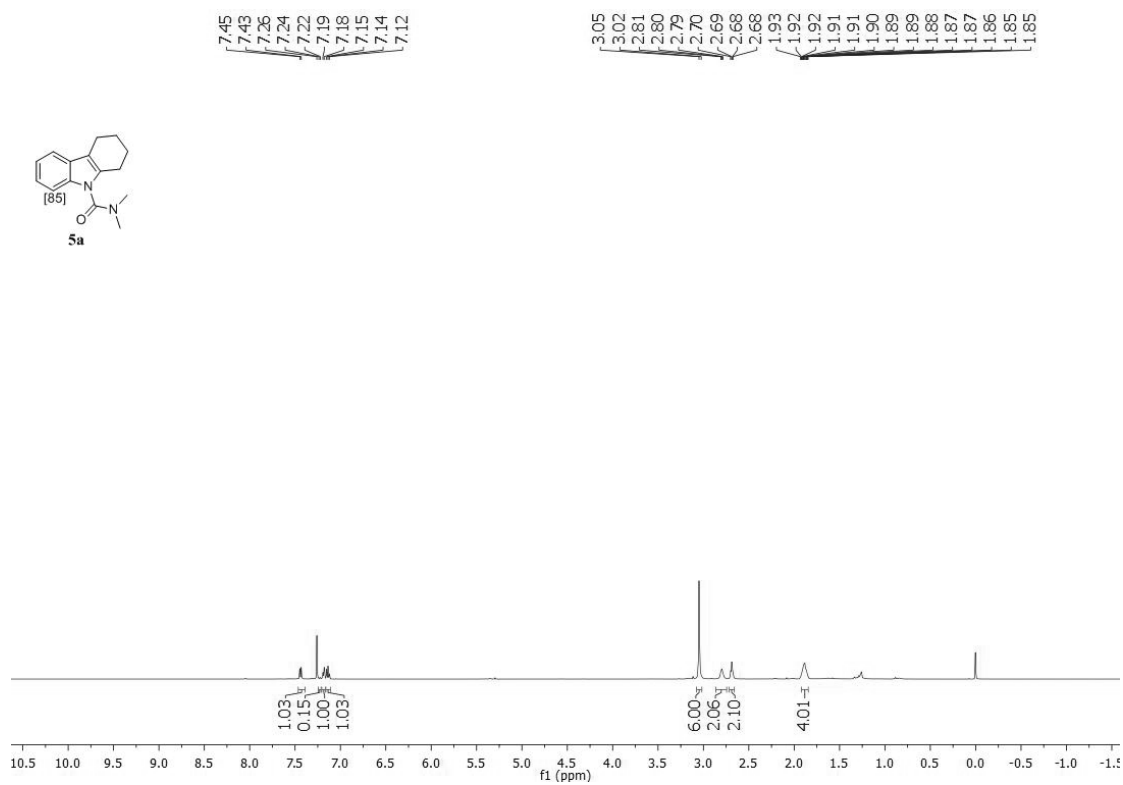

### $^{13}\text{C}$ NMR spectra of compound **5a**

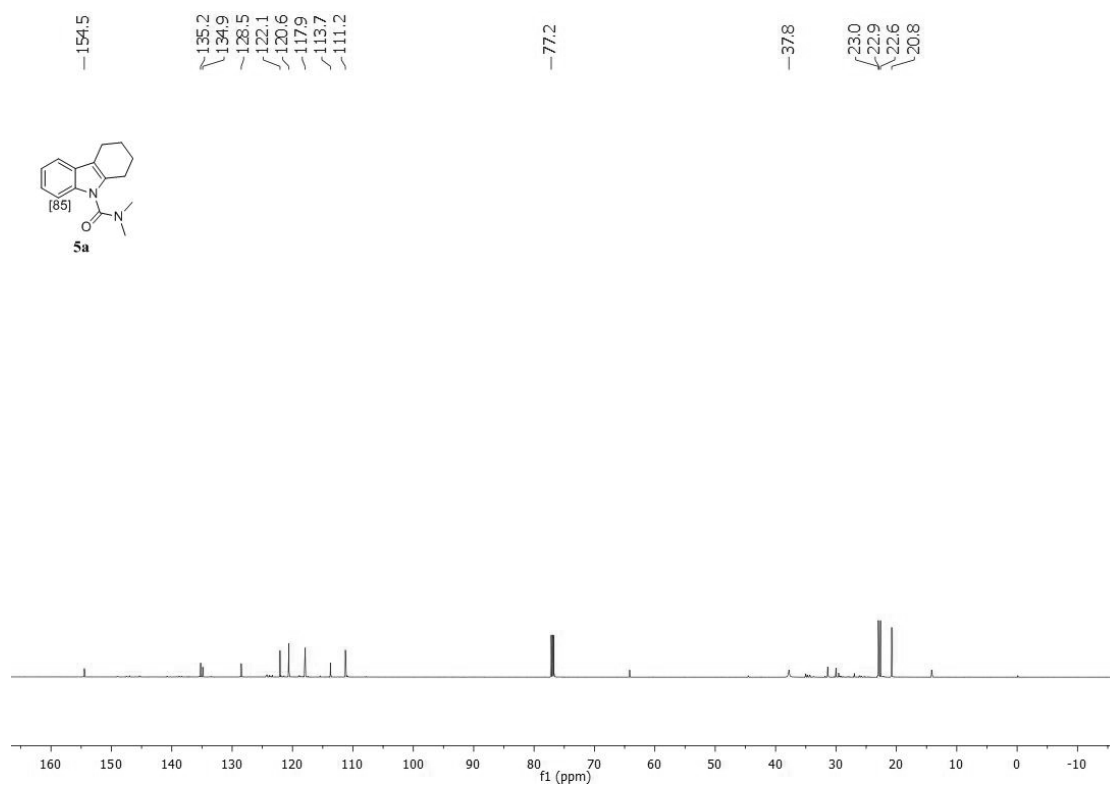

## HRMS spectrum of compound **5a**

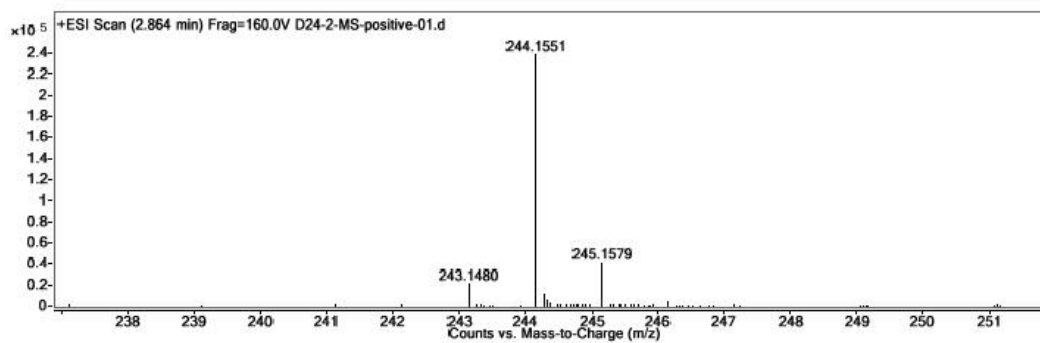

### Elemental Composition Calculator

|                                                   |                                               |                     |                  |                 |                    |
|---------------------------------------------------|-----------------------------------------------|---------------------|------------------|-----------------|--------------------|
| <b>Target m/z:</b>                                | 244.1551                                      | <b>Result type:</b> | Positive ions    | <b>Species:</b> | [M+H] <sup>+</sup> |
| <b>Elements:</b>                                  | C (0-80); H (0-120); O (0-30); N(0-5); D(0-5) |                     |                  |                 |                    |
| <b>Ion Formula</b>                                | <b>Calculated m/z</b>                         |                     | <b>PPM Error</b> |                 |                    |
| C <sub>15</sub> H <sub>18</sub> DN <sub>2</sub> O | 244.1555                                      |                     | 0.75             |                 |                    |

# <sup>1</sup>H NMR spectra of compound **5b**

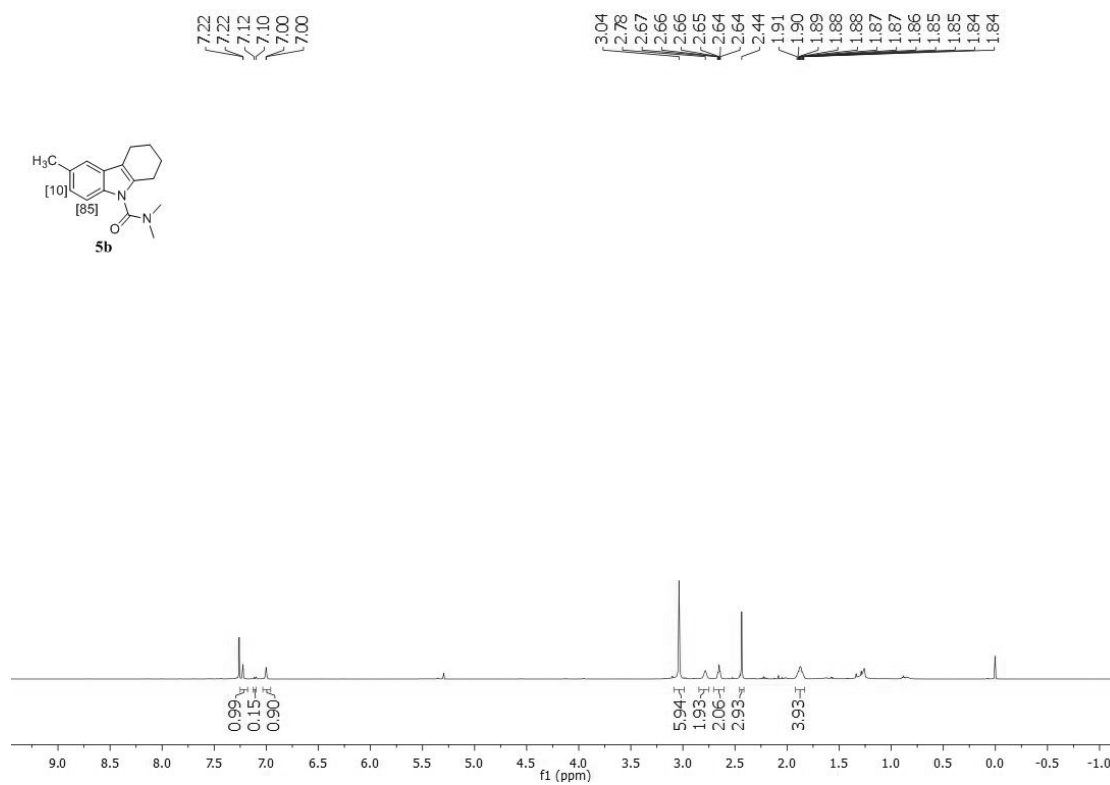

# <sup>13</sup>C NMR spectra of compound **5b**

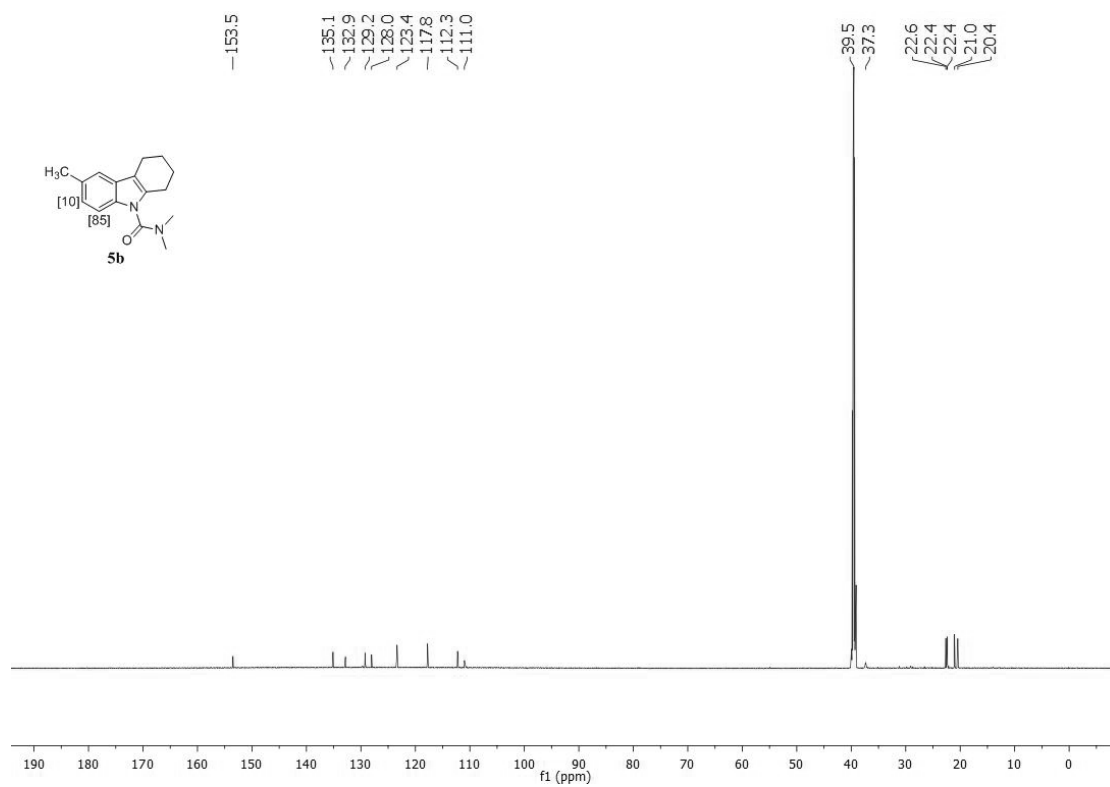

## HRMS spectrum of compound **5b**

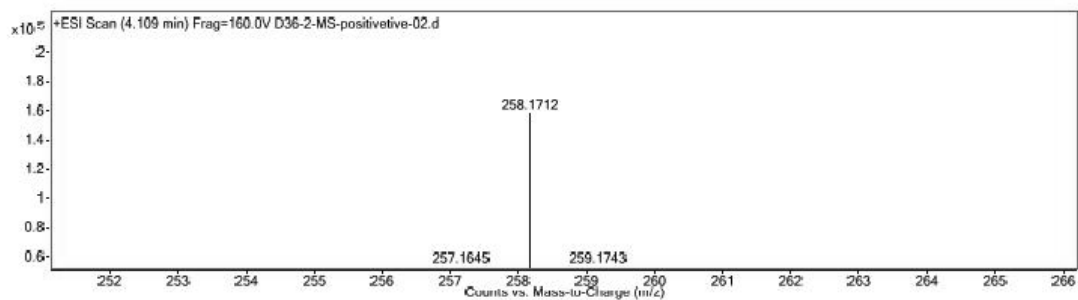

### Elemental Composition Calculator

|                                                   |                                               |                     |                  |                 |                    |
|---------------------------------------------------|-----------------------------------------------|---------------------|------------------|-----------------|--------------------|
| <b>Target m/z:</b>                                | 258.1712                                      | <b>Result type:</b> | Positive ions    | <b>Species:</b> | [M+H] <sup>+</sup> |
| <b>Elements:</b>                                  | C (0-80); H (0-120); O (0-30); N(0-5); D(0-5) |                     |                  |                 |                    |
| <b>Ion Formula</b>                                | <b>Calculated m/z</b>                         |                     | <b>PPM Error</b> |                 |                    |
| C <sub>16</sub> H <sub>20</sub> DN <sub>2</sub> O | 258.1711                                      |                     | -0.22            |                 |                    |

### $^1\text{H}$ NMR spectra of compound **5d**

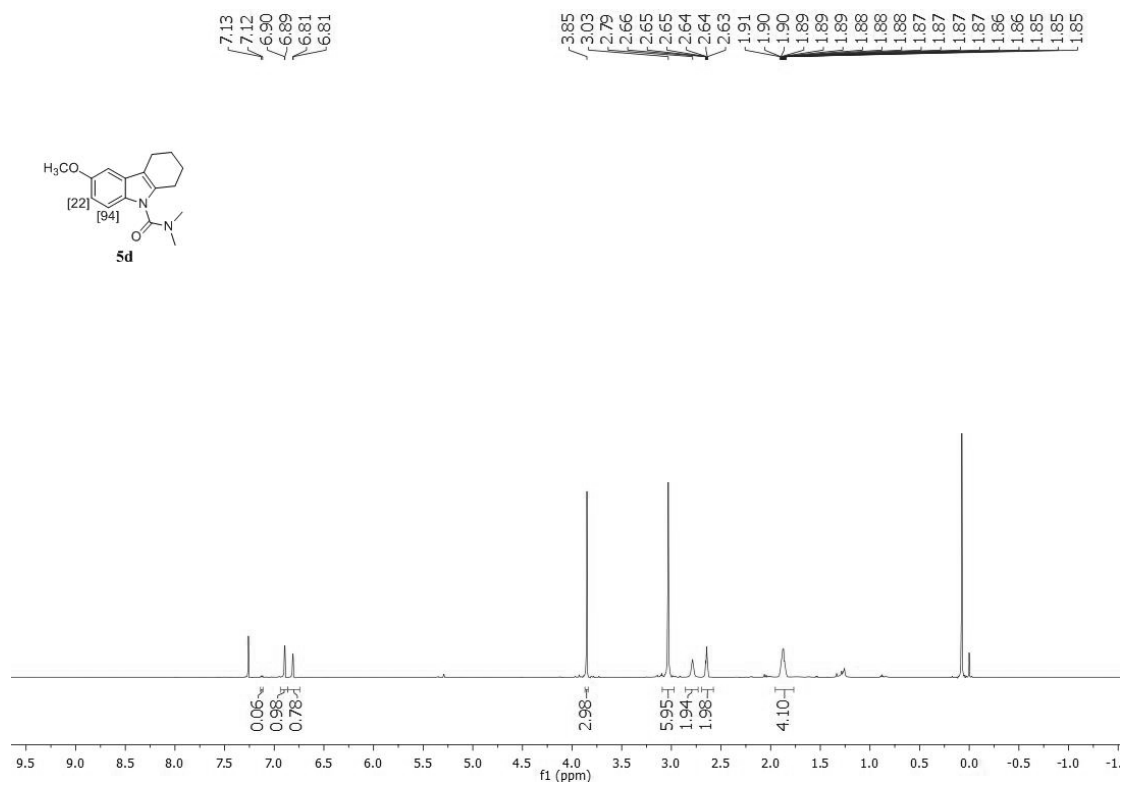

### $^{13}\text{C}$ NMR spectra of compound **5d**

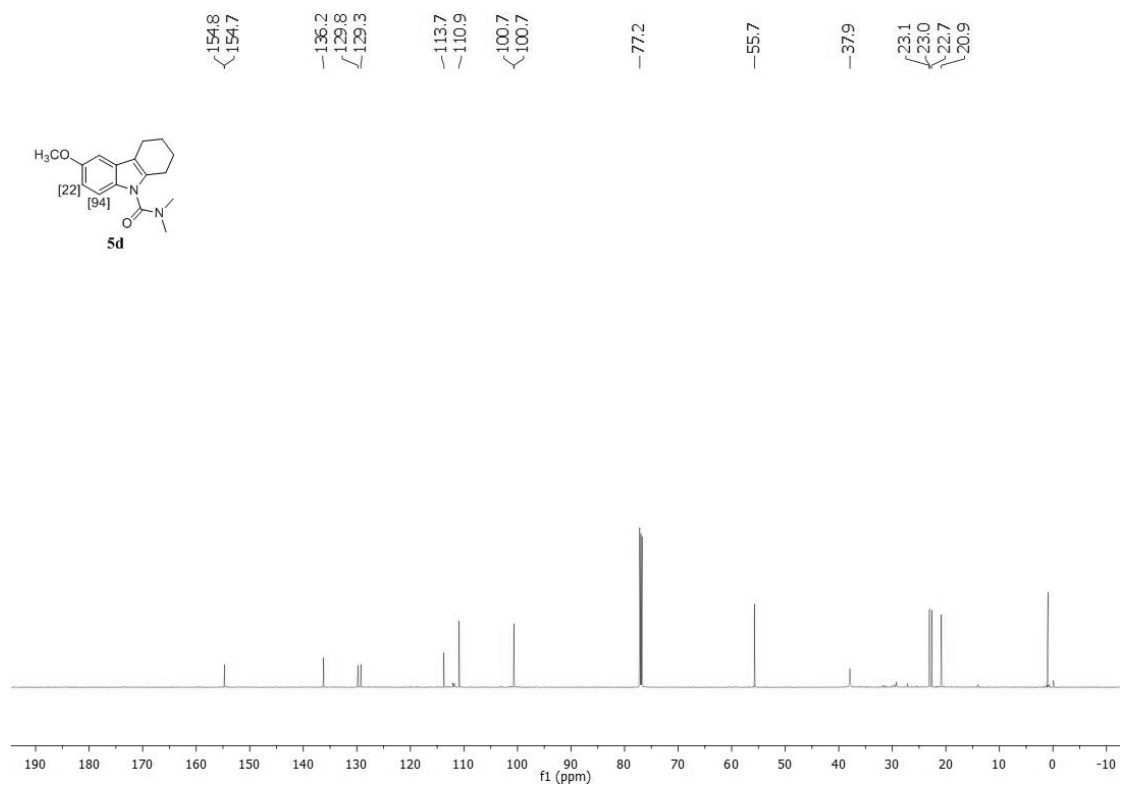

## HRMS spectrum of compound **5d**

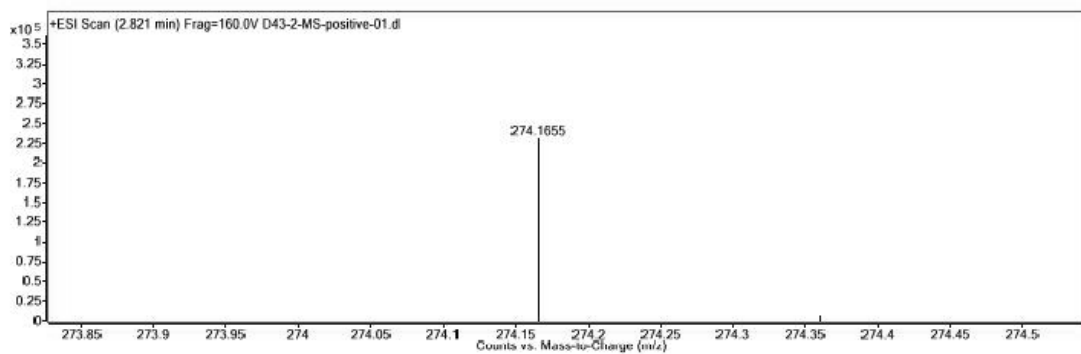

### Elemental Composition Calculator

|                                                                |                                                 |                     |               |                  |                    |
|----------------------------------------------------------------|-------------------------------------------------|---------------------|---------------|------------------|--------------------|
| <b>Target m/z:</b>                                             | 274.1655                                        | <b>Result type:</b> | Positive ions | <b>Species:</b>  | [M+H] <sup>+</sup> |
| <b>Elements:</b>                                               | C (0-80); H (0-120); O (0-30) ; N(0-5) ; D(0-5) |                     |               |                  |                    |
| <b>Ion Formula</b>                                             | <b>Calculated m/z</b>                           |                     |               | <b>PPM Error</b> |                    |
| C <sub>16</sub> H <sub>19</sub> DN <sub>2</sub> O <sub>2</sub> | 274.1660                                        |                     |               | 1.89             |                    |

$^1\text{H}$  NMR spectra of compound **5e**

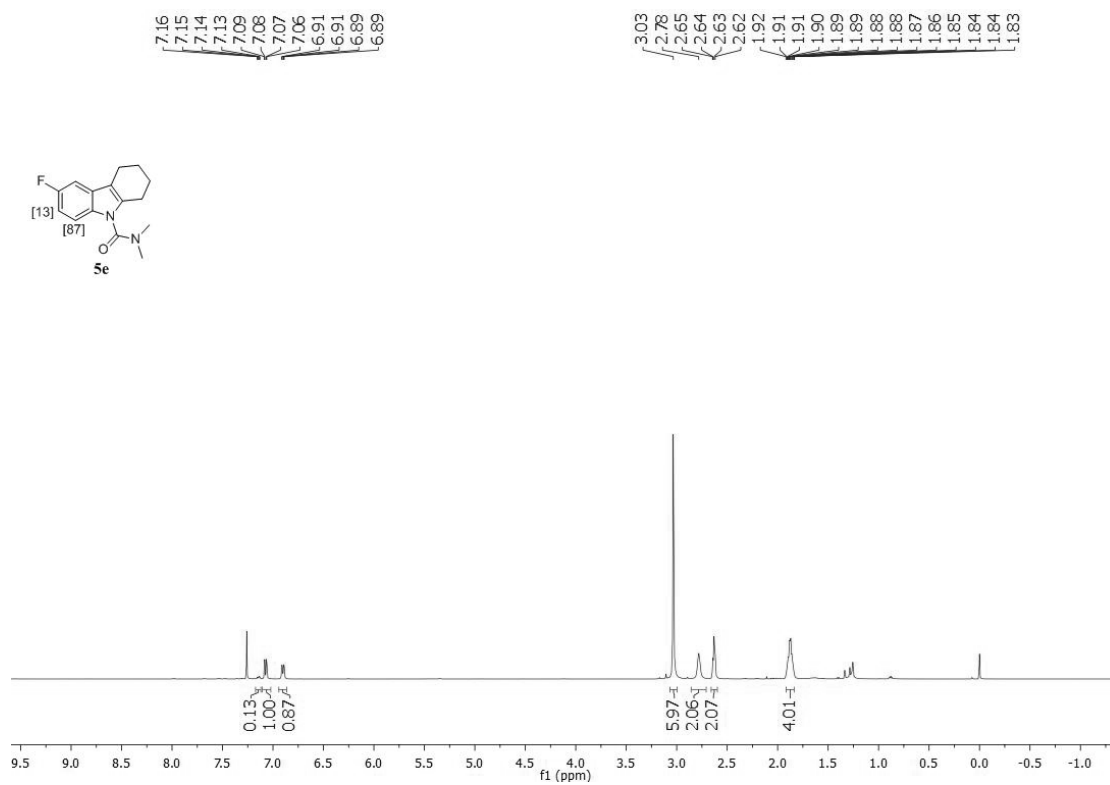

$^{13}\text{C}$  NMR spectra of compound **5e**

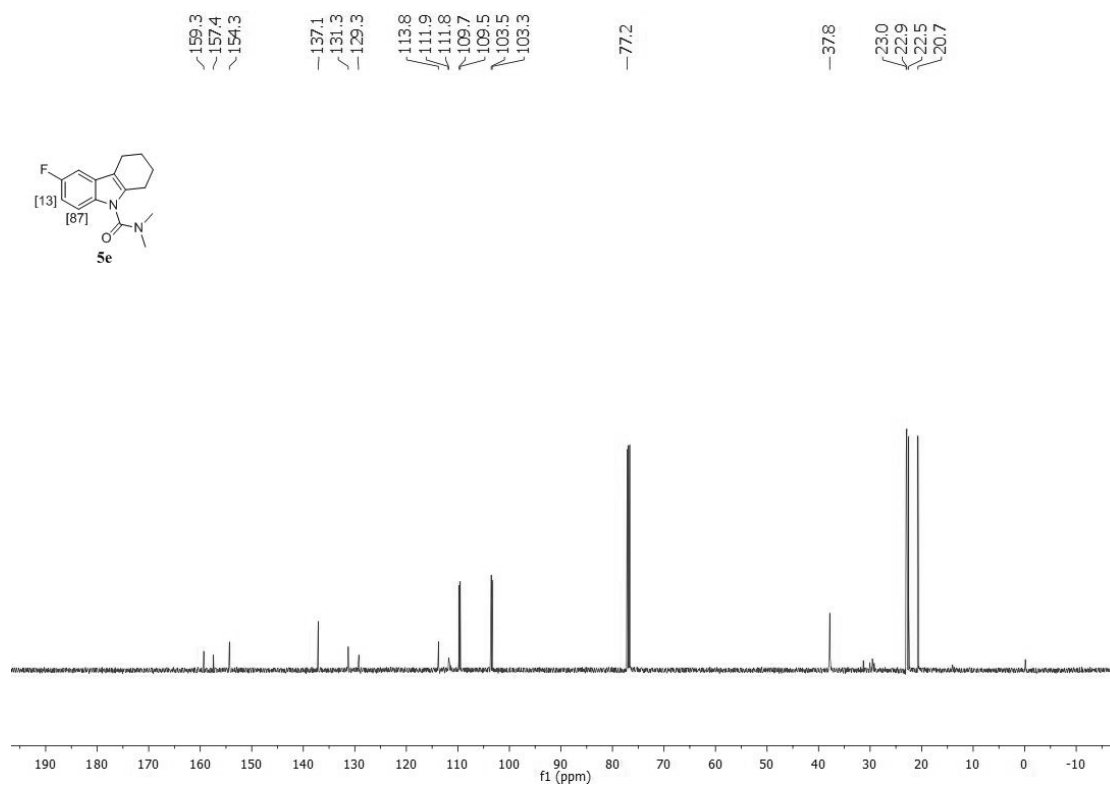

## HRMS spectrum of compound **5e**

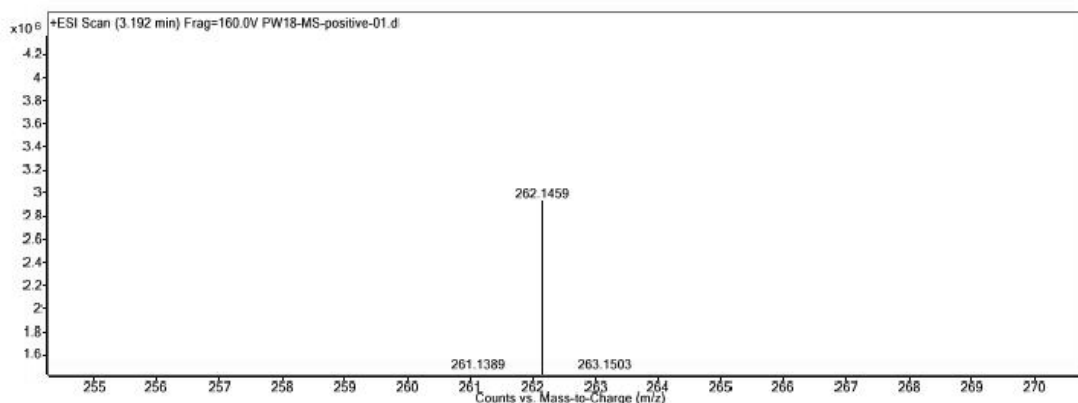

### Elemental Composition Calculator

|                                                    |                                                       |                     |                  |                 |                    |
|----------------------------------------------------|-------------------------------------------------------|---------------------|------------------|-----------------|--------------------|
| <b>Target m/z:</b>                                 | 262.1459                                              | <b>Result type:</b> | Positive ions    | <b>Species:</b> | [M+H] <sup>+</sup> |
| <b>Elements:</b>                                   | C (0-80); H (0-120); O (0-30); N(0-5); D(0-5); F(0-5) |                     |                  |                 |                    |
| <b>Ion Formula</b>                                 | <b>Calculated m/z</b>                                 |                     | <b>PPM Error</b> |                 |                    |
| C <sub>15</sub> H <sub>17</sub> DFN <sub>2</sub> O | 262.1460                                              |                     | 0.40             |                 |                    |



# <sup>1</sup>H NMR spectra of compound **5g**

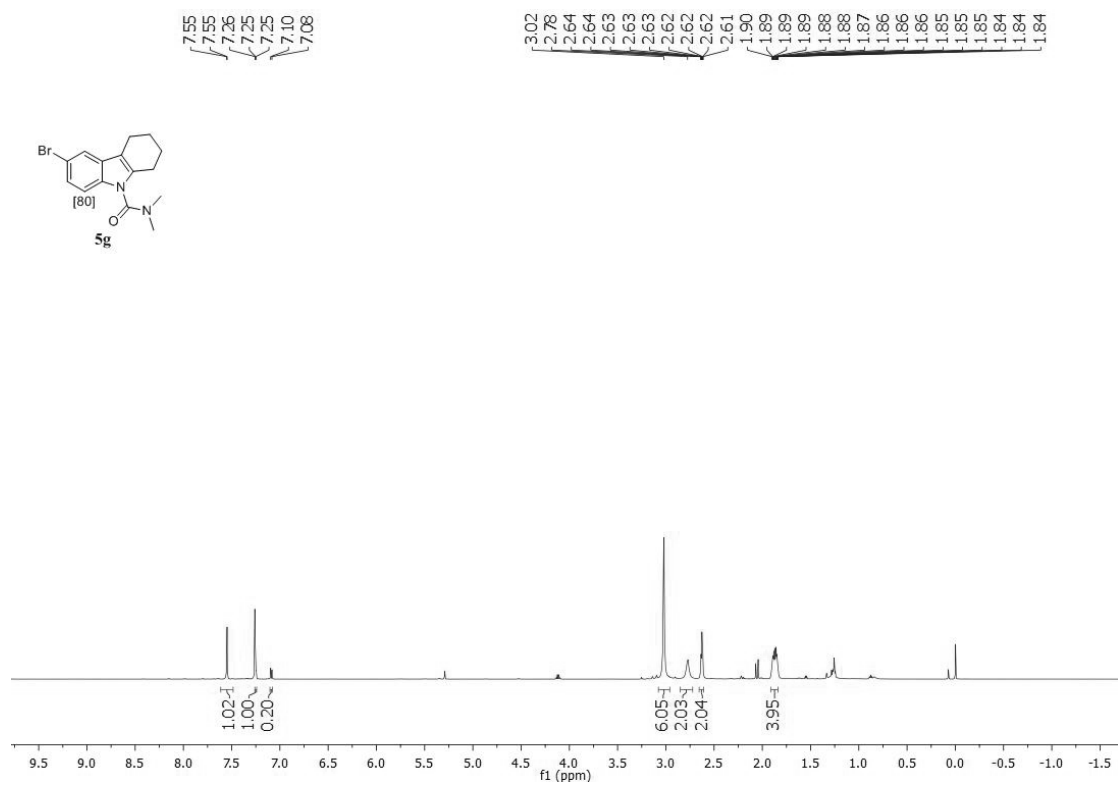

# <sup>13</sup>C NMR spectra of compound **5g**

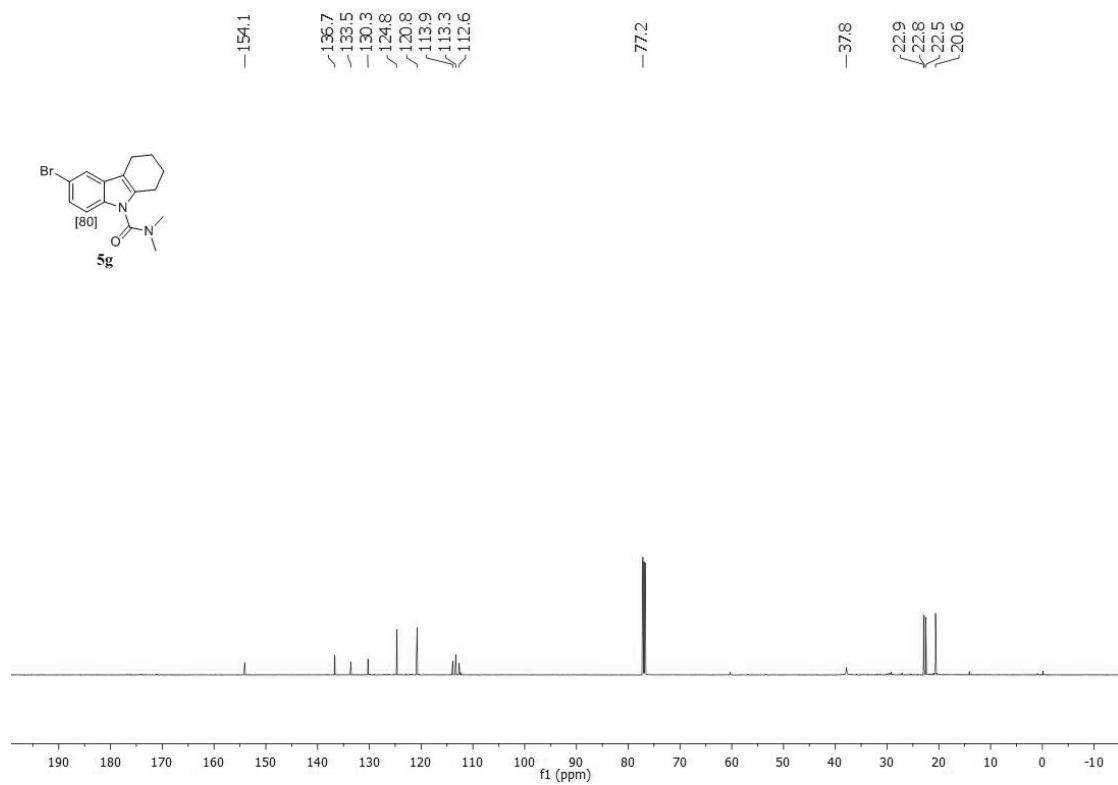

## HRMS spectrum of compound **5g**

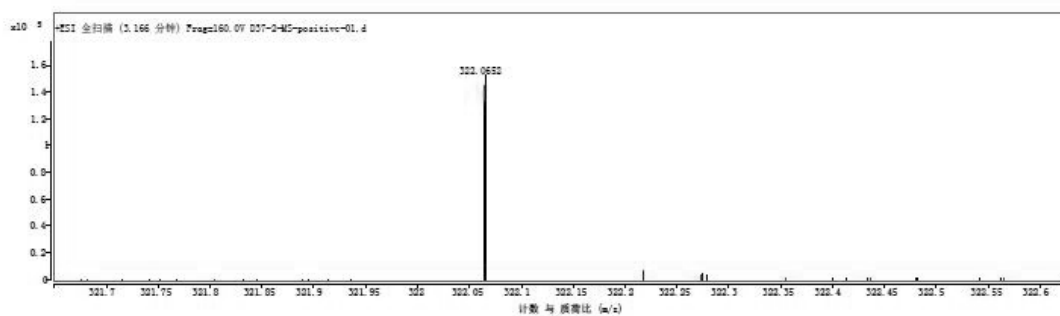

### Elemental Composition Calculator

|                                                                |                                        |                     |                  |                 |                    |
|----------------------------------------------------------------|----------------------------------------|---------------------|------------------|-----------------|--------------------|
| <b>Target m/z:</b>                                             | 322.0652                               | <b>Result type:</b> | Positive ions    | <b>Species:</b> | [M+H] <sup>+</sup> |
| <b>Elements:</b>                                               | C (0-80); H (0-120); O (0-30) ; N(0-5) |                     |                  |                 |                    |
| <b>Ion Formula</b>                                             | <b>Calculated m/z</b>                  |                     | <b>PPM Error</b> |                 |                    |
| C <sub>28</sub> H <sub>38</sub> N <sub>0</sub> O <sub>10</sub> | 322.066                                |                     | 3.52             |                 |                    |

# <sup>1</sup>H NMR spectra of compound **5h**

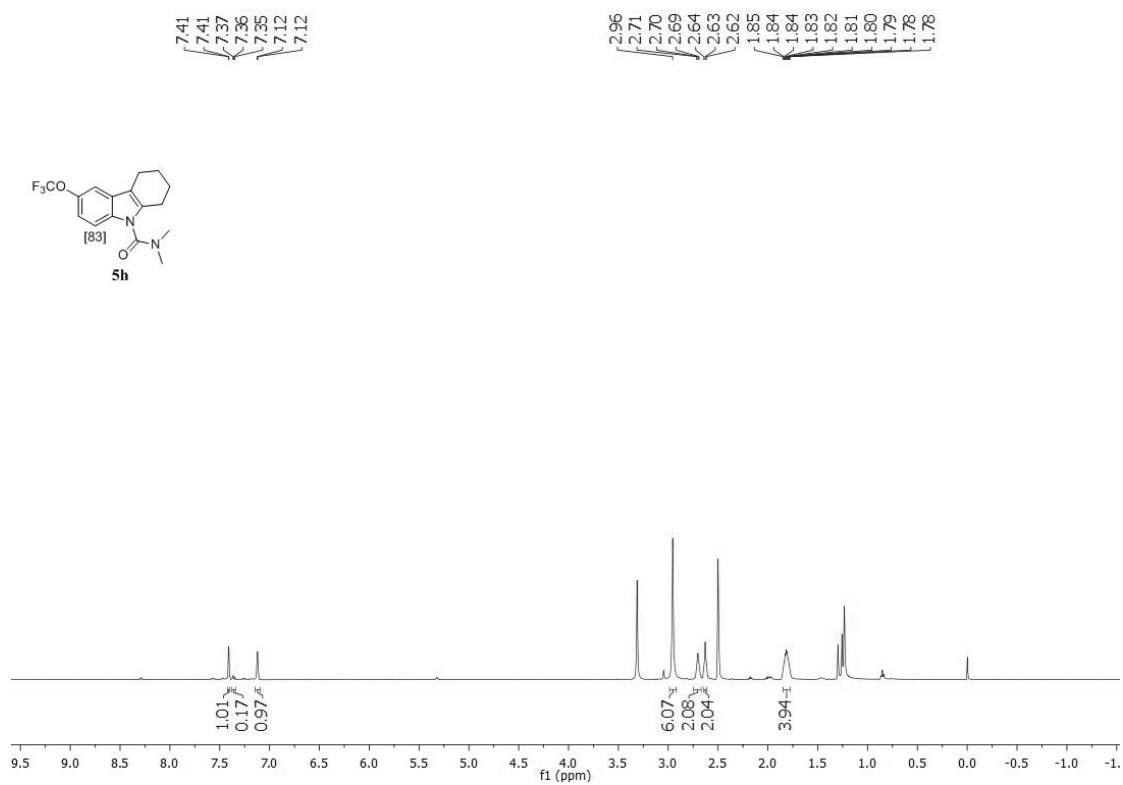

# <sup>13</sup>C NMR spectra of compound **5h**

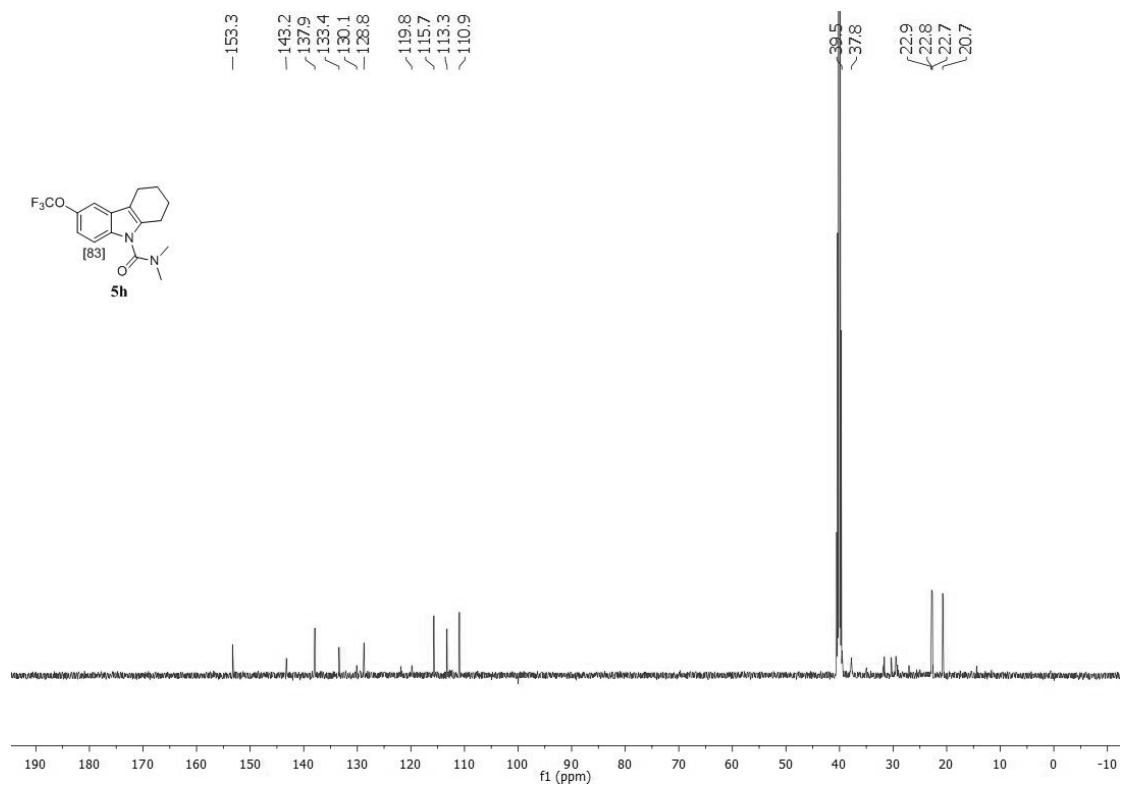

## HRMS spectrum of compound **5h**

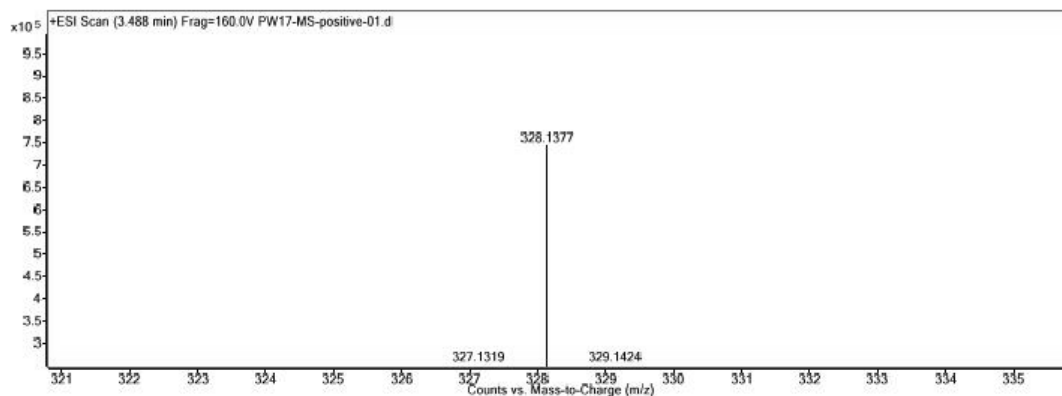

### Elemental Composition Calculator

|                                                                               |                                                       |                     |                  |                 |                    |
|-------------------------------------------------------------------------------|-------------------------------------------------------|---------------------|------------------|-----------------|--------------------|
| <b>Target m/z:</b>                                                            | 328.1377                                              | <b>Result type:</b> | Positive ions    | <b>Species:</b> | [M+H] <sup>+</sup> |
| <b>Elements:</b>                                                              | C (0-80); H (0-120); O (0-30); N(0-5); D(0-5); F(0-5) |                     |                  |                 |                    |
| <b>Ion Formula</b>                                                            | <b>Calculated m/z</b>                                 |                     | <b>PPM Error</b> |                 |                    |
| C <sub>16</sub> H <sub>17</sub> DF <sub>3</sub> N <sub>2</sub> O <sub>2</sub> | 328.1378                                              |                     | 0.14             |                 |                    |

# <sup>1</sup>H NMR spectra of compound **5i**

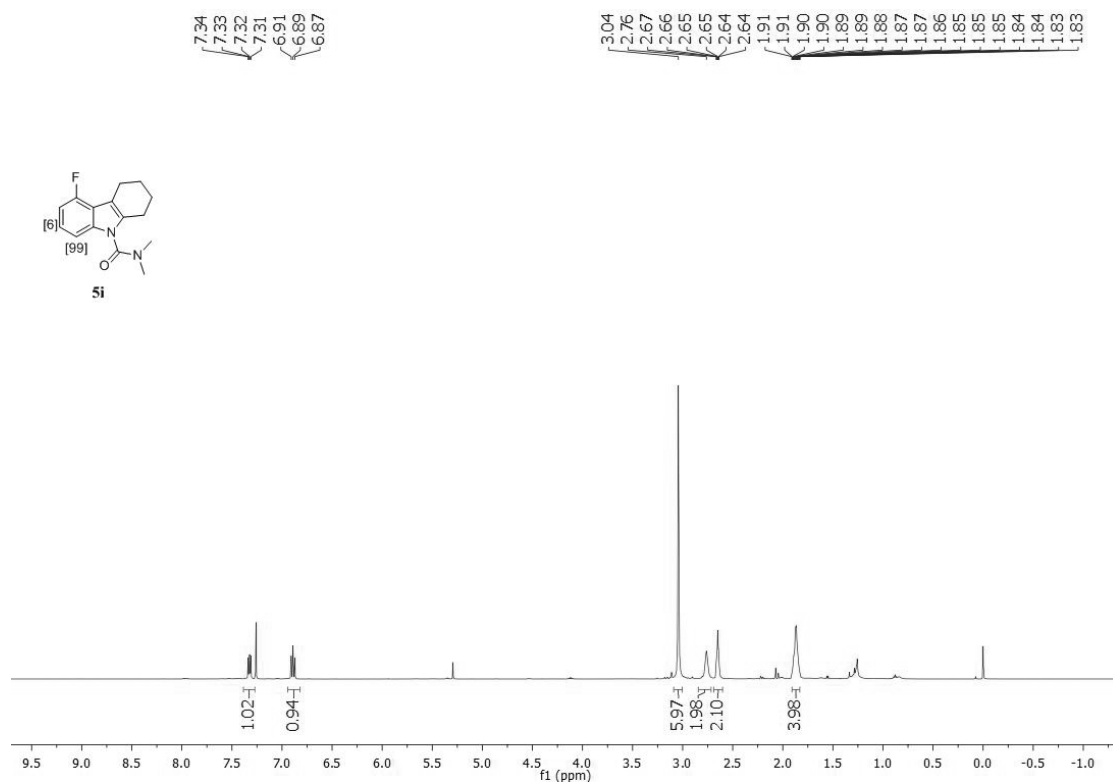

# <sup>13</sup>C NMR spectra of compound **5i**

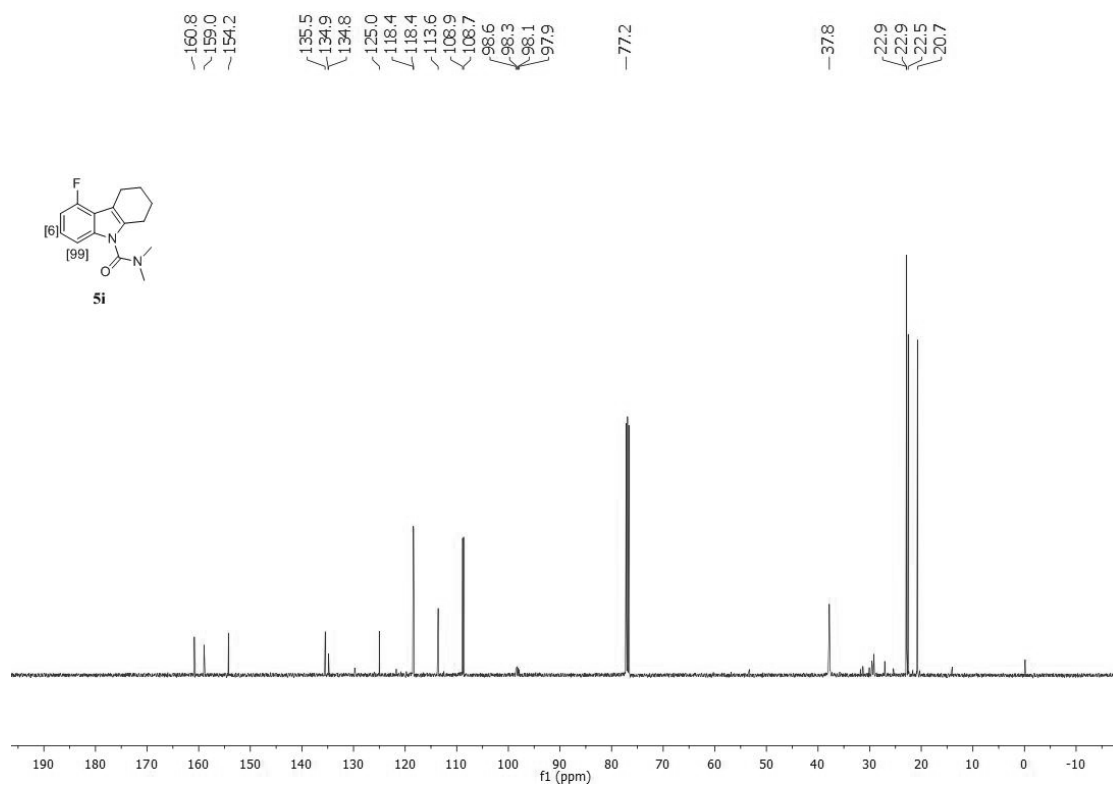

## HRMS spectrum of compound **5i**

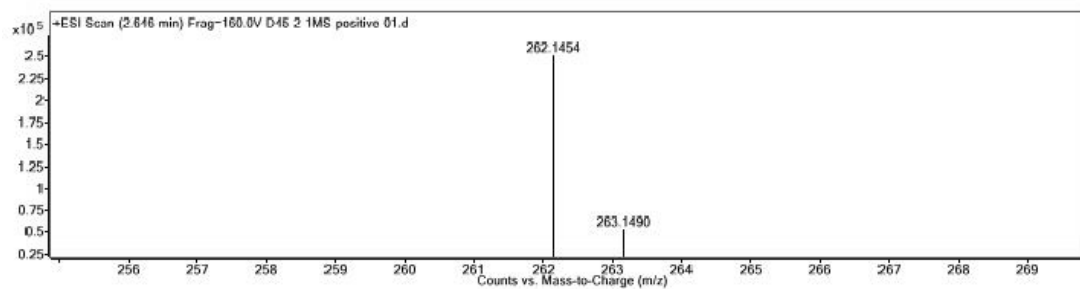

### Elemental Composition Calculator

|                                                    |                                                       |                     |                  |                 |                    |
|----------------------------------------------------|-------------------------------------------------------|---------------------|------------------|-----------------|--------------------|
| <b>Target m/z:</b>                                 | 262.1454                                              | <b>Result type:</b> | Positive ions    | <b>Species:</b> | [M+H] <sup>+</sup> |
| <b>Elements:</b>                                   | C (0-80); H (0-120); O (0-30); N(0-5); D(0-5); F(0-5) |                     |                  |                 |                    |
| <b>Ion Formula</b>                                 | <b>Calculated m/z</b>                                 |                     | <b>PPM Error</b> |                 |                    |
| C <sub>15</sub> H <sub>17</sub> DFN <sub>2</sub> O | 262.1460                                              |                     | 2.44             |                 |                    |

# <sup>1</sup>H NMR spectra of compound **5m**

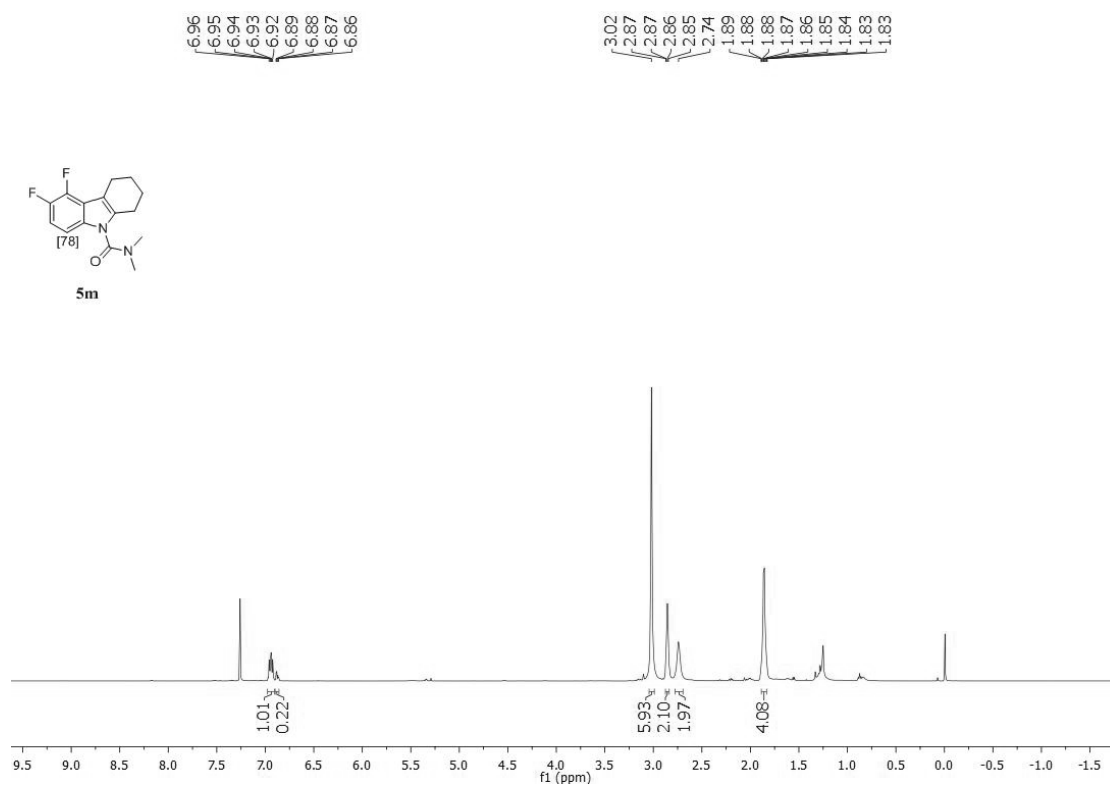

# <sup>13</sup>C NMR spectra of compound **5m**

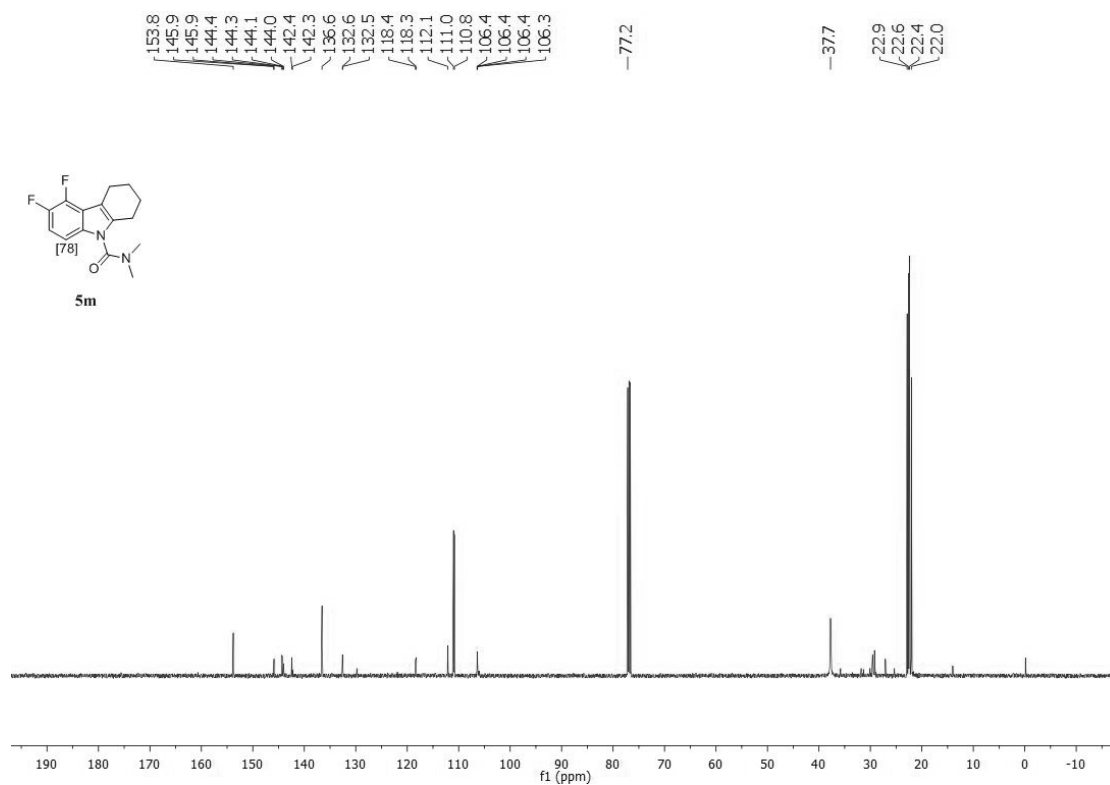

## HRMS spectrum of compound **5m**

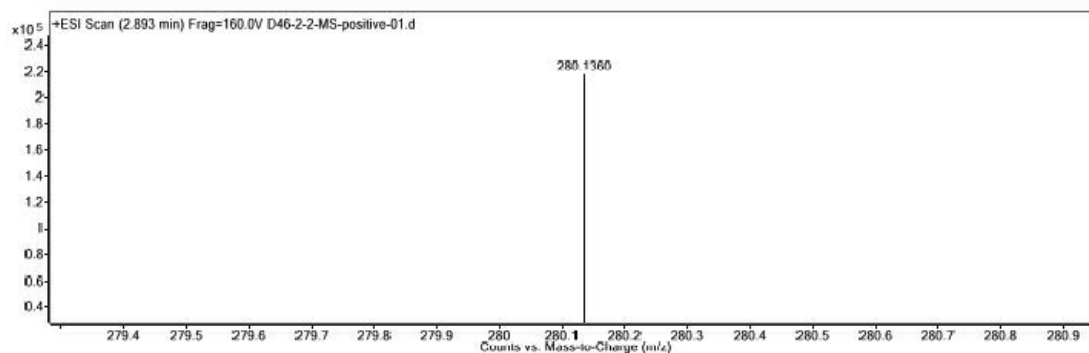

### Elemental Composition Calculator

|                                                                  |                                                       |                     |               |                 |                    |
|------------------------------------------------------------------|-------------------------------------------------------|---------------------|---------------|-----------------|--------------------|
| <b>Target m/z:</b>                                               | 280.1360                                              | <b>Result type:</b> | Positive ions | <b>Species:</b> | [M+H] <sup>+</sup> |
| <b>Elements:</b>                                                 | C (0-80); H (0-120); O (0-30); N(0-5); D(0-5); F(0-5) |                     |               |                 |                    |
| <b>Ion Formula</b>                                               | <b>Calculated m/z</b>                                 | <b>PPM Error</b>    |               |                 |                    |
| C <sub>15</sub> H <sub>16</sub> DF <sub>2</sub> N <sub>2</sub> O | 280.1366                                              | 2.38                |               |                 |                    |



$^1\text{H}$  NMR spectra of compound **5n**

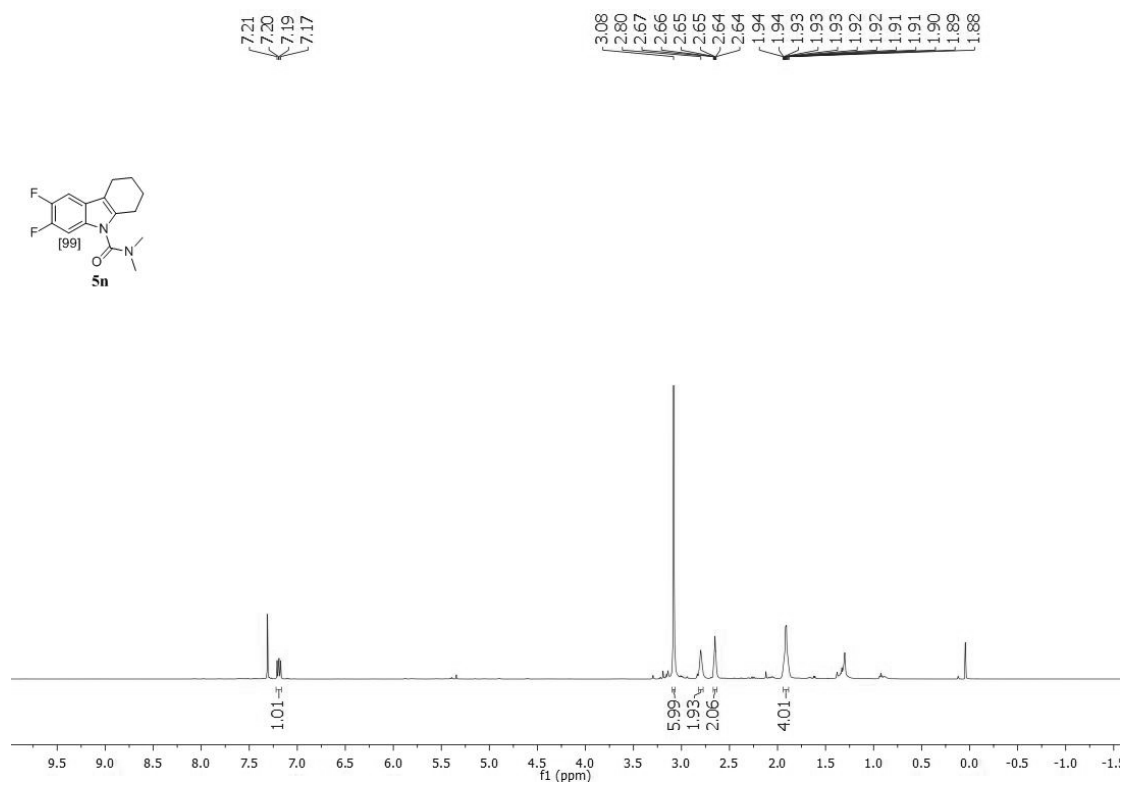

$^{13}\text{C}$  NMR spectra of compound **5n**

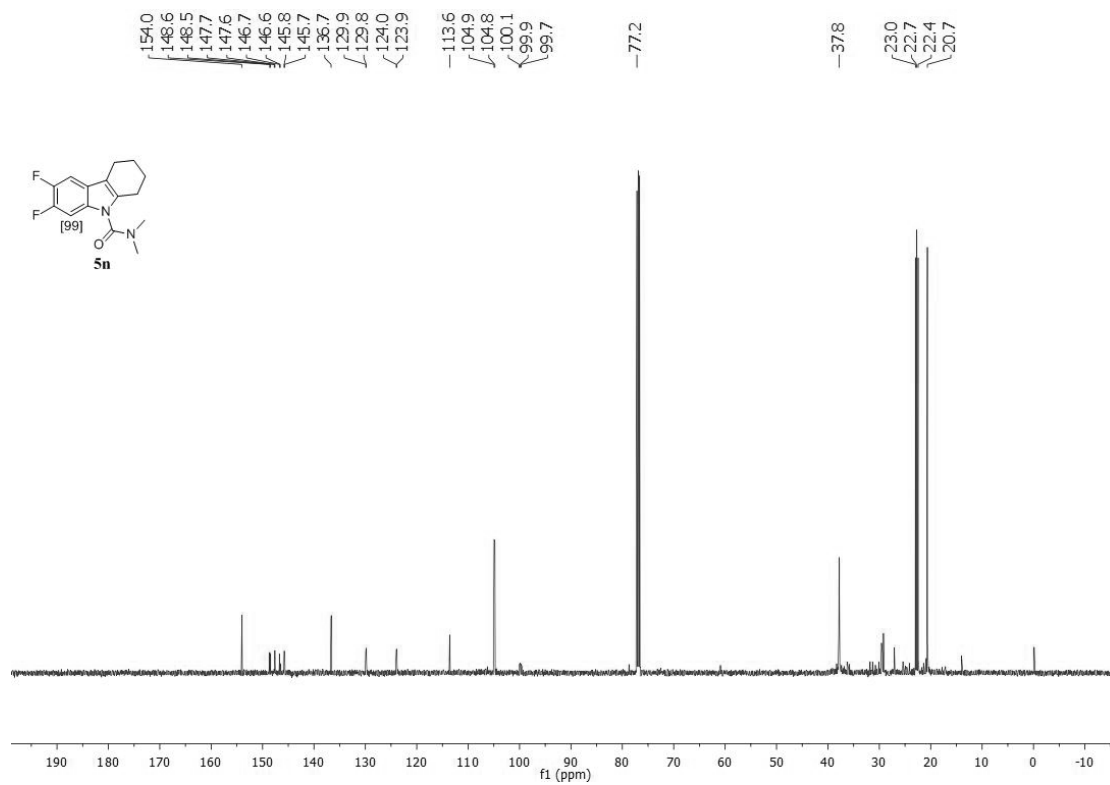

## HRMS spectrum of compound **5n**

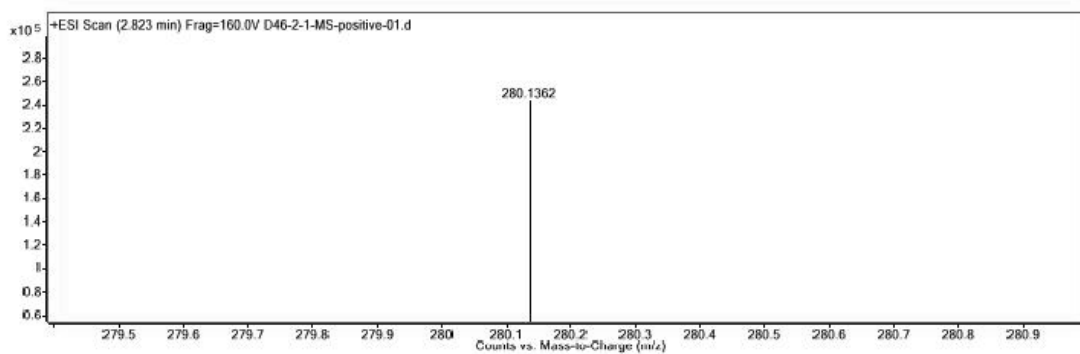

### Elemental Composition Calculator

|                                                                  |                                                       |                     |               |                 |                    |
|------------------------------------------------------------------|-------------------------------------------------------|---------------------|---------------|-----------------|--------------------|
| <b>Target m/z:</b>                                               | 280.1362                                              | <b>Result type:</b> | Positive ions | <b>Species:</b> | [M+H] <sup>+</sup> |
| <b>Elements:</b>                                                 | C (0-80); H (0-120); O (0-30); N(0-5); D(0-5); F(0-5) |                     |               |                 |                    |
| <b>Ion Formula</b>                                               | <b>Calculated m/z</b>                                 | <b>PPM Error</b>    |               |                 |                    |
| C <sub>15</sub> H <sub>16</sub> DF <sub>2</sub> N <sub>2</sub> O | 280.1366                                              | 1.51                |               |                 |                    |

### <sup>1</sup>H NMR spectra of compound **50**

7.44  
7.44  
7.43  
7.42  
7.24  
7.24  
7.22  
7.19  
7.18  
7.15  
7.14  
7.12  
3.06  
3.03  
2.84  
2.83  
2.81  
2.80  
2.28  
2.28  
2.28  
2.27  
2.26  
2.26  
2.25  
2.24  
2.23  
2.23  
2.22  
2.00  
1.99  
1.98  
1.98  
1.98  
1.97  
1.96  
1.95  
1.95  
1.59  
1.57  
1.56  
1.56  
1.55  
1.55  
1.54  
1.54  
1.53  
1.53  
1.52  
1.50  
1.15  
1.14

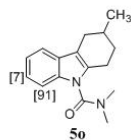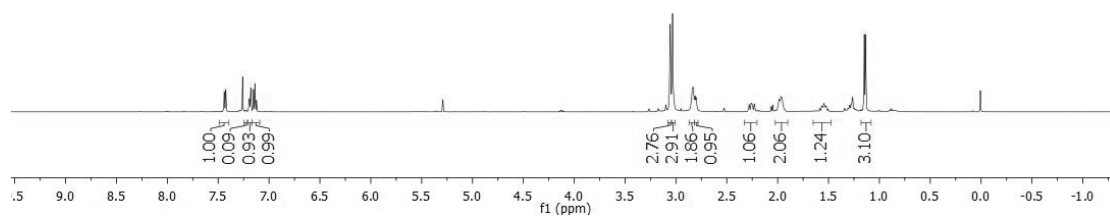

### <sup>13</sup>C NMR spectra of compound **50**

155.1  
135.6  
135.5  
128.9  
122.5  
121.1  
118.4  
114.2  
111.8  
77.2  
38.5  
36.2  
31.7  
29.7  
29.5  
23.1  
22.0

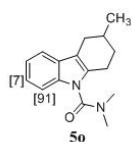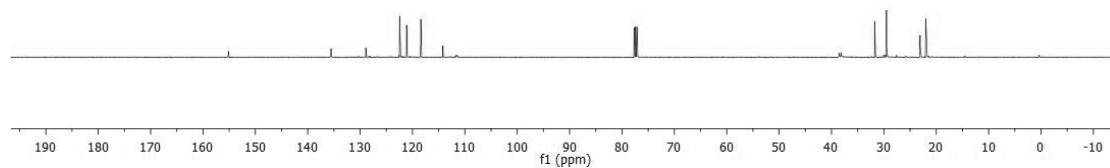

## HRMS spectrum of compound **5o**

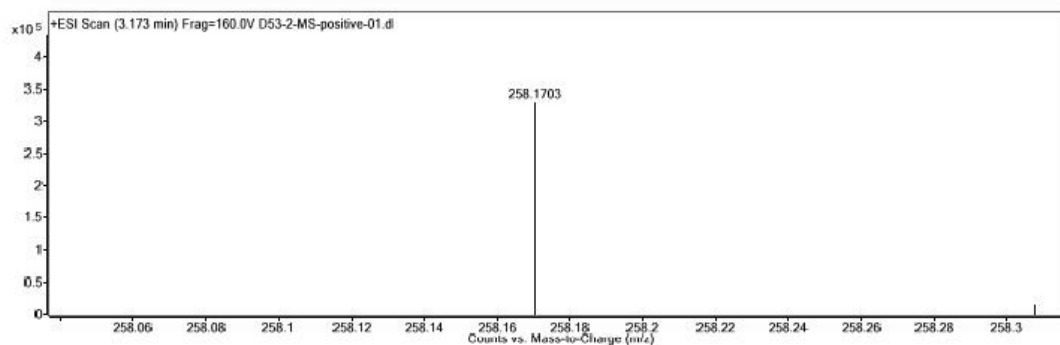

### Elemental Composition Calculator

|                                                   |                                               |                     |                  |                 |                    |
|---------------------------------------------------|-----------------------------------------------|---------------------|------------------|-----------------|--------------------|
| <b>Target m/z:</b>                                | 258.1703                                      | <b>Result type:</b> | Positive ions    | <b>Species:</b> | [M+H] <sup>+</sup> |
| <b>Elements:</b>                                  | C (0-80); H (0-120); O (0-30); N(0-5); D(0-5) |                     |                  |                 |                    |
| <b>Ion Formula</b>                                | <b>Calculated m/z</b>                         |                     | <b>PPM Error</b> |                 |                    |
| C <sub>16</sub> H <sub>20</sub> DN <sub>2</sub> O | 258.1711                                      |                     | 3.11             |                 |                    |

### <sup>1</sup>H NMR spectra of compound **5p**

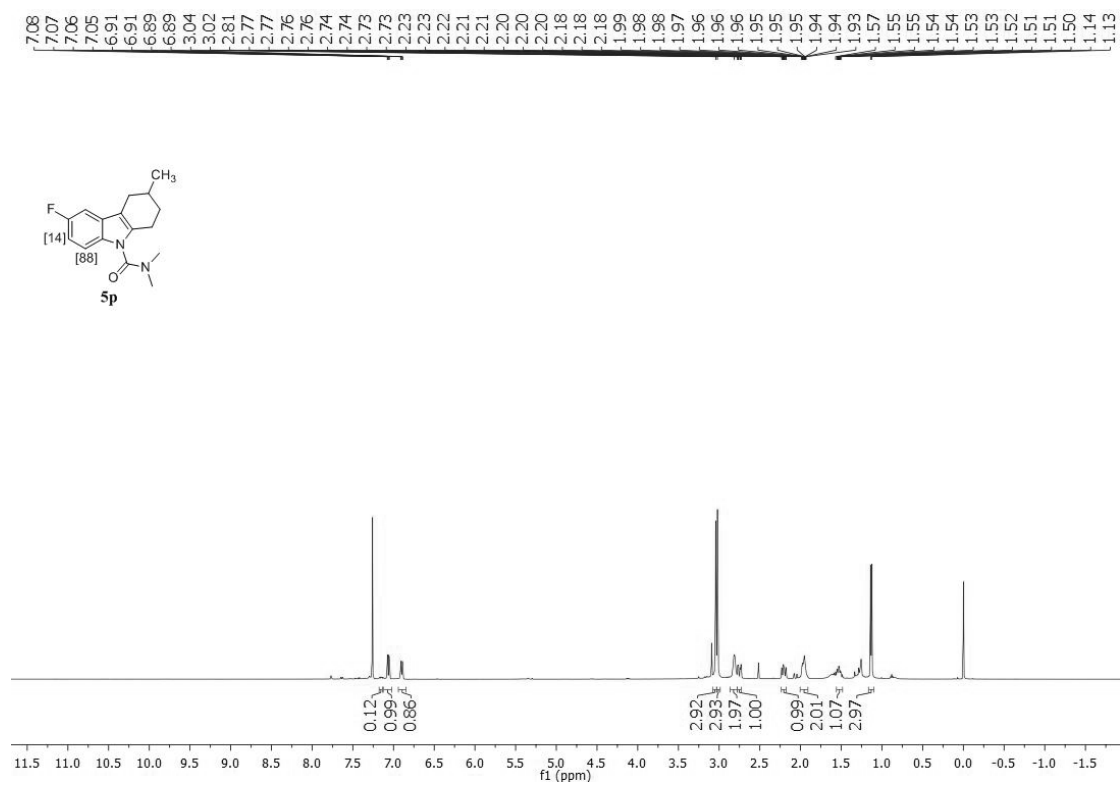

### <sup>13</sup>C NMR spectra of compound **5p**

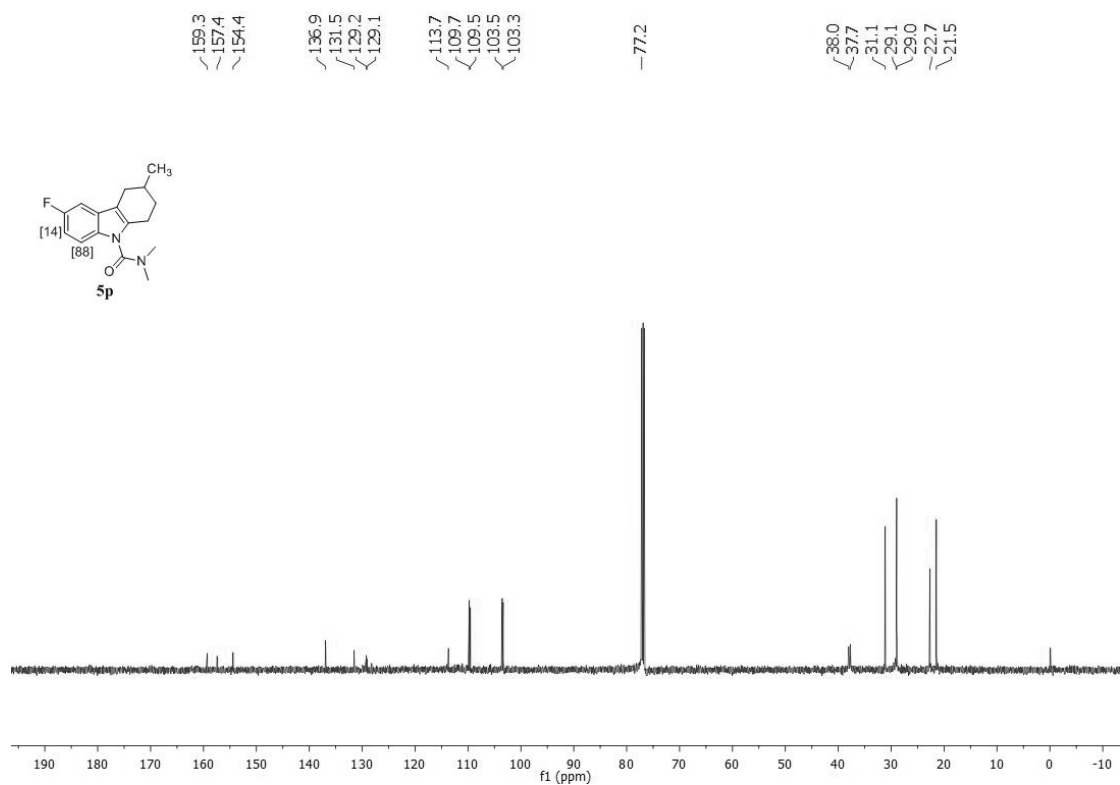

## HRMS spectrum of compound **5p**

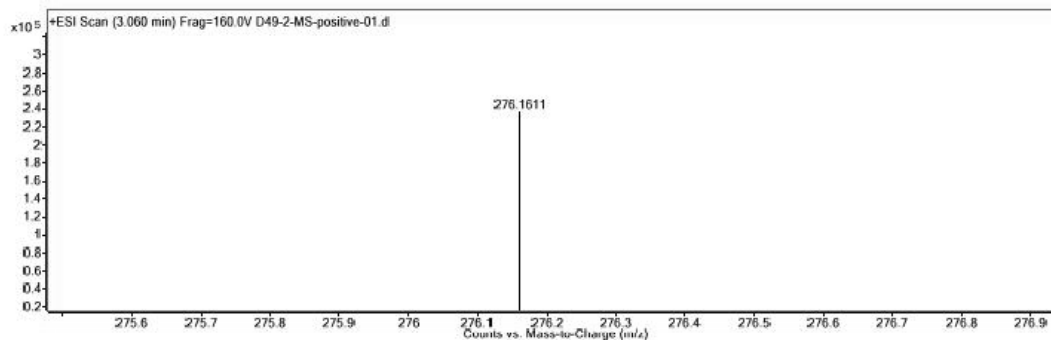

### Elemental Composition Calculator

|                                                    |                                                       |                     |                  |                 |                    |
|----------------------------------------------------|-------------------------------------------------------|---------------------|------------------|-----------------|--------------------|
| <b>Target m/z:</b>                                 | 276.1611                                              | <b>Result type:</b> | Positive ions    | <b>Species:</b> | [M+H] <sup>+</sup> |
| <b>Elements:</b>                                   | C (0-80); H (0-120); O (0-30); N(0-5); D(0-5); F(0-5) |                     |                  |                 |                    |
| <b>Ion Formula</b>                                 | <b>Calculated m/z</b>                                 |                     | <b>PPM Error</b> |                 |                    |
| C <sub>16</sub> H <sub>19</sub> DFN <sub>2</sub> O | 276.1617                                              |                     | 2.07             |                 |                    |

### <sup>1</sup>H NMR spectra of compound **5u**

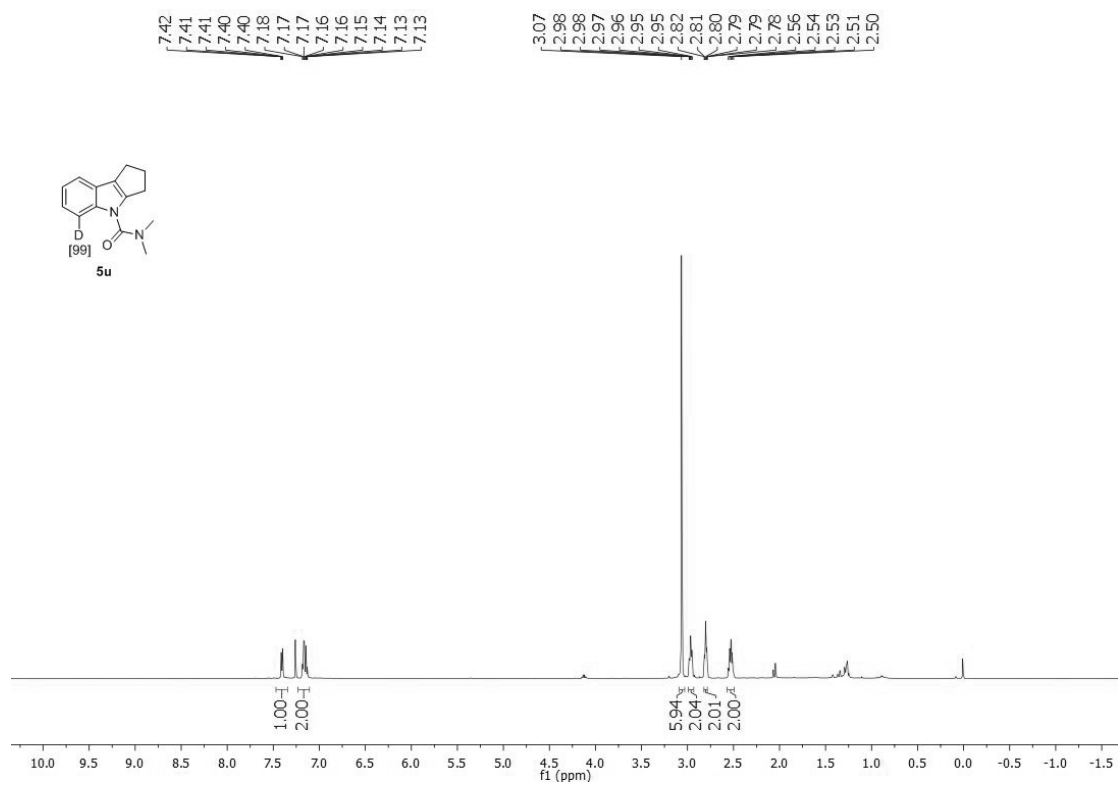

### <sup>13</sup>C NMR spectra of compound **5u**

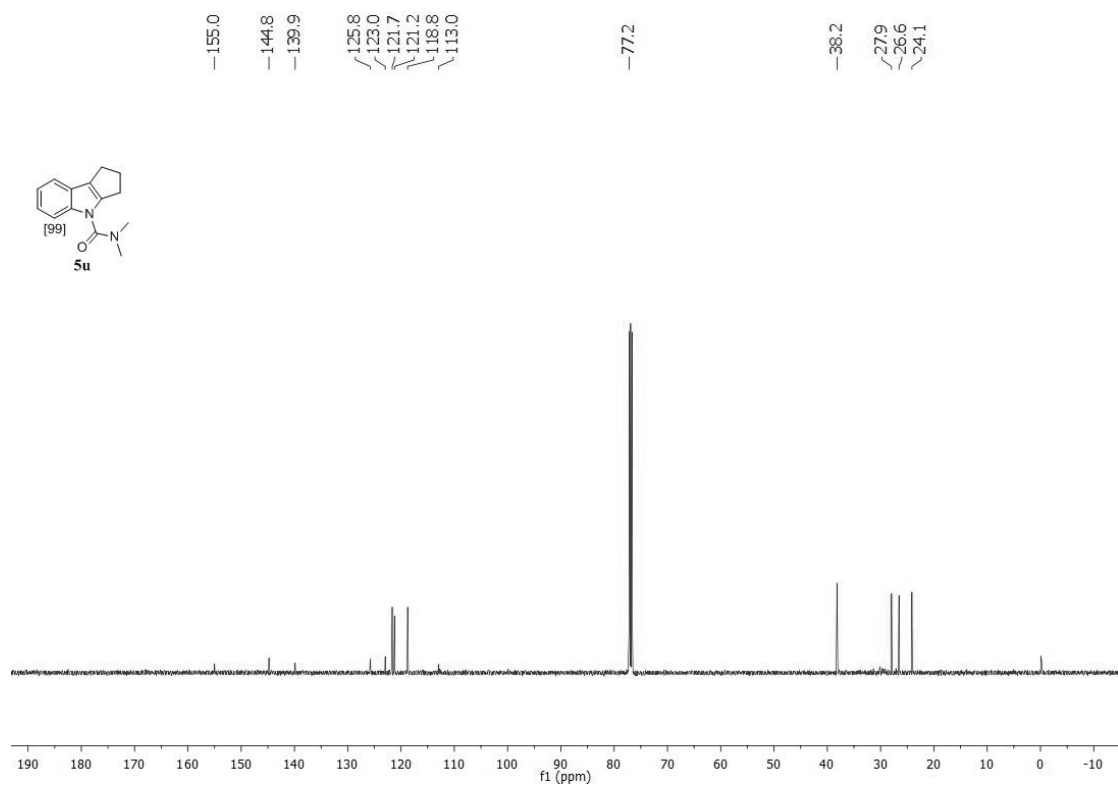

## HRMS spectrum of compound **5u**

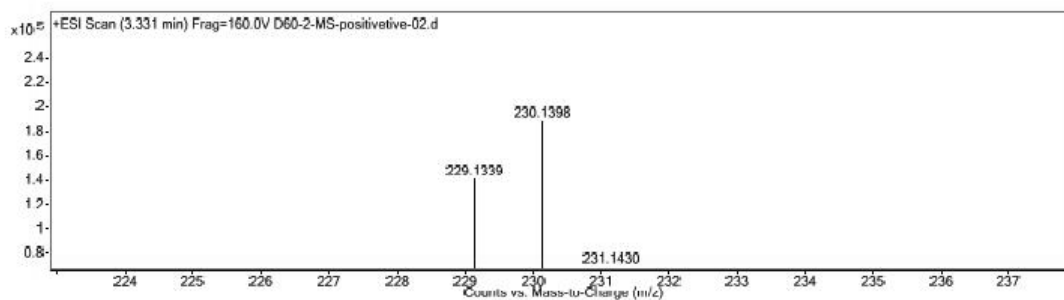

### Elemental Composition Calculator

|                    |                                               |                     |                  |                 |                    |
|--------------------|-----------------------------------------------|---------------------|------------------|-----------------|--------------------|
| <b>Target m/z:</b> | 230.1398                                      | <b>Result type:</b> | Positive ions    | <b>Species:</b> | [M+H] <sup>+</sup> |
| <b>Elements:</b>   | C (0-80); H (0-120); O (0-30); N(0-5); D(0-5) |                     |                  |                 |                    |
| <b>Ion Formula</b> | <b>Calculated m/z</b>                         |                     | <b>PPM Error</b> |                 |                    |
| C14H16DN2O         | 230.1398                                      |                     | 0.04             |                 |                    |



# <sup>1</sup>H NMR spectra of compound **5y**

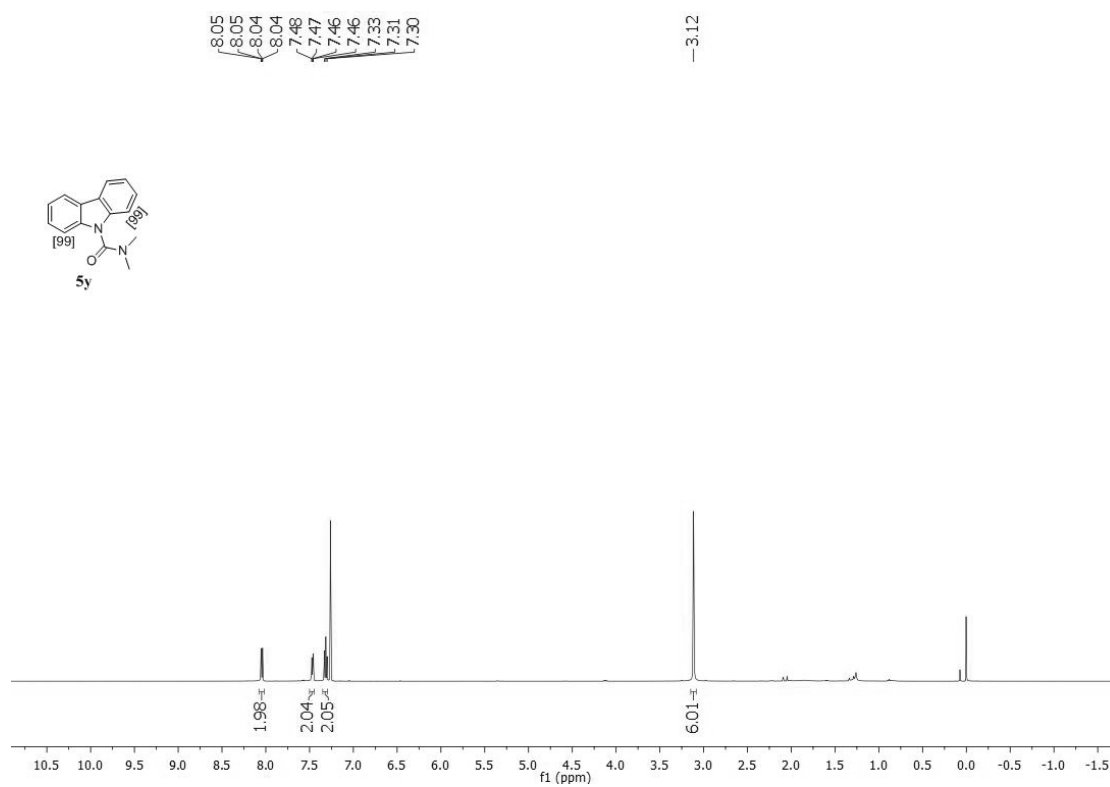

# <sup>13</sup>C NMR spectra of compound **5y**

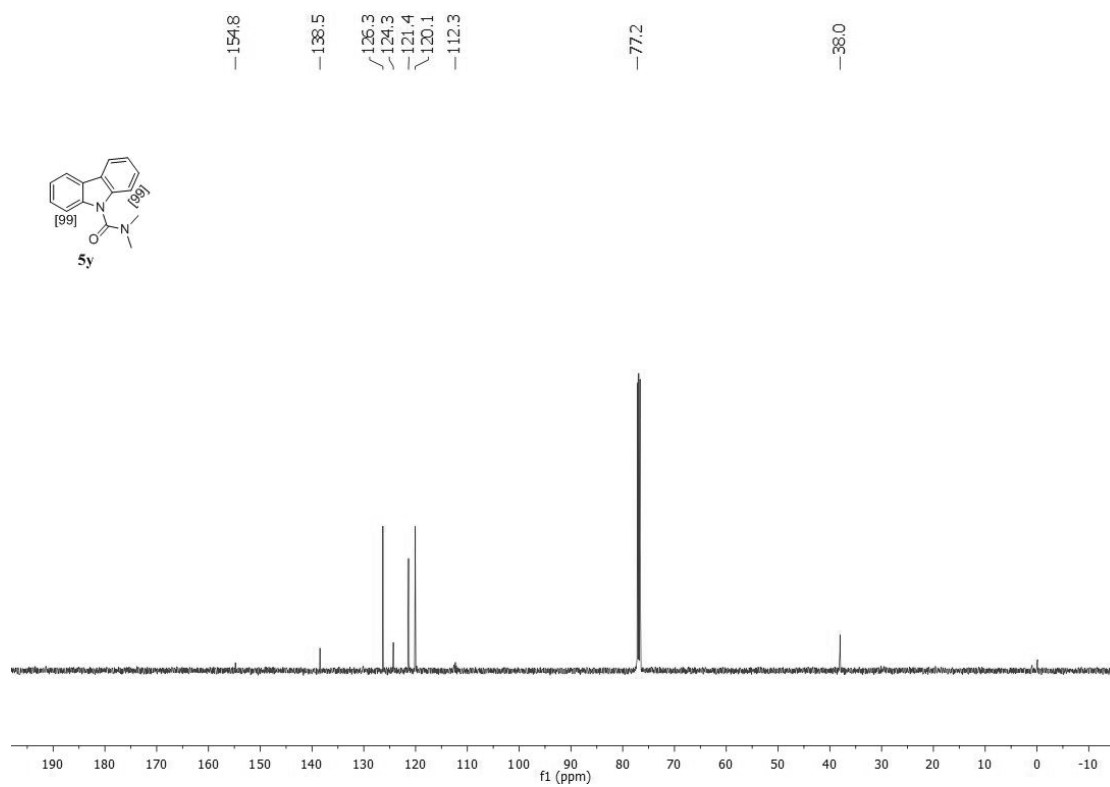

## HRMS spectrum of compound **5y**

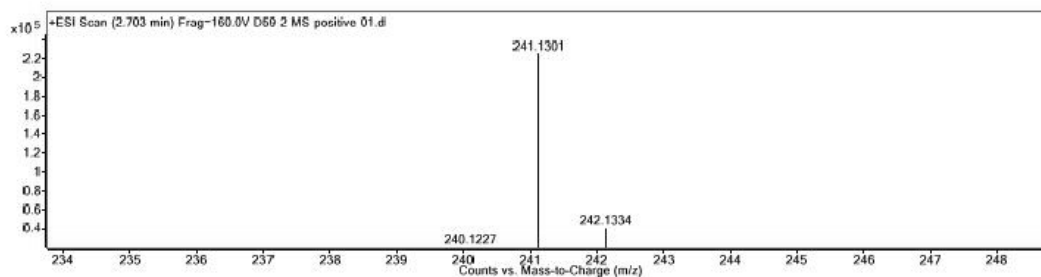

### Elemental Composition Calculator

|                                                                 |                                               |                     |                  |                 |                    |
|-----------------------------------------------------------------|-----------------------------------------------|---------------------|------------------|-----------------|--------------------|
| <b>Target m/z:</b>                                              | 241.1301                                      | <b>Result type:</b> | Positive ions    | <b>Species:</b> | [M+H] <sup>+</sup> |
| <b>Elements:</b>                                                | C (0-80); H (0-120); O (0-30); N(0-5); D(0-5) |                     |                  |                 |                    |
| <b>Ion Formula</b>                                              | <b>Calculated m/z</b>                         |                     | <b>PPM Error</b> |                 |                    |
| C <sub>15</sub> H <sub>13</sub> D <sub>2</sub> N <sub>2</sub> O | 241.1304                                      |                     | 1.55             |                 |                    |

<sup>1</sup>H NMR spectra of compound **3u'**

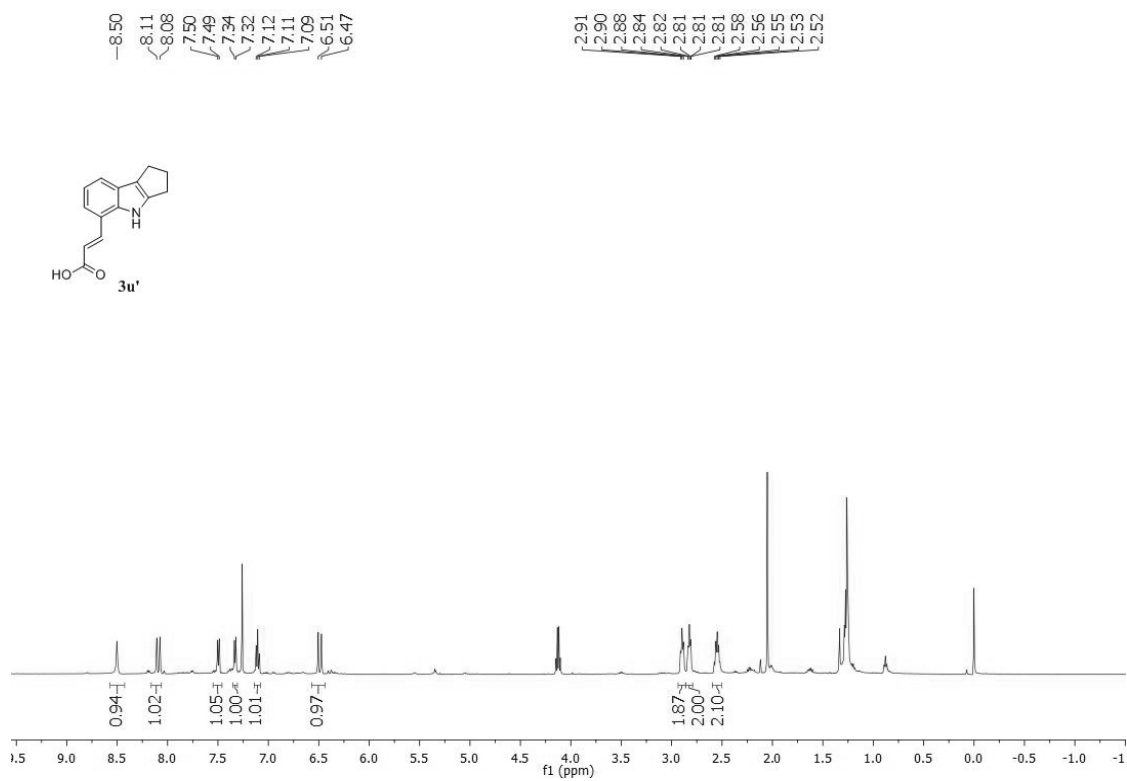

<sup>13</sup>C NMR spectra of compound **3u'**

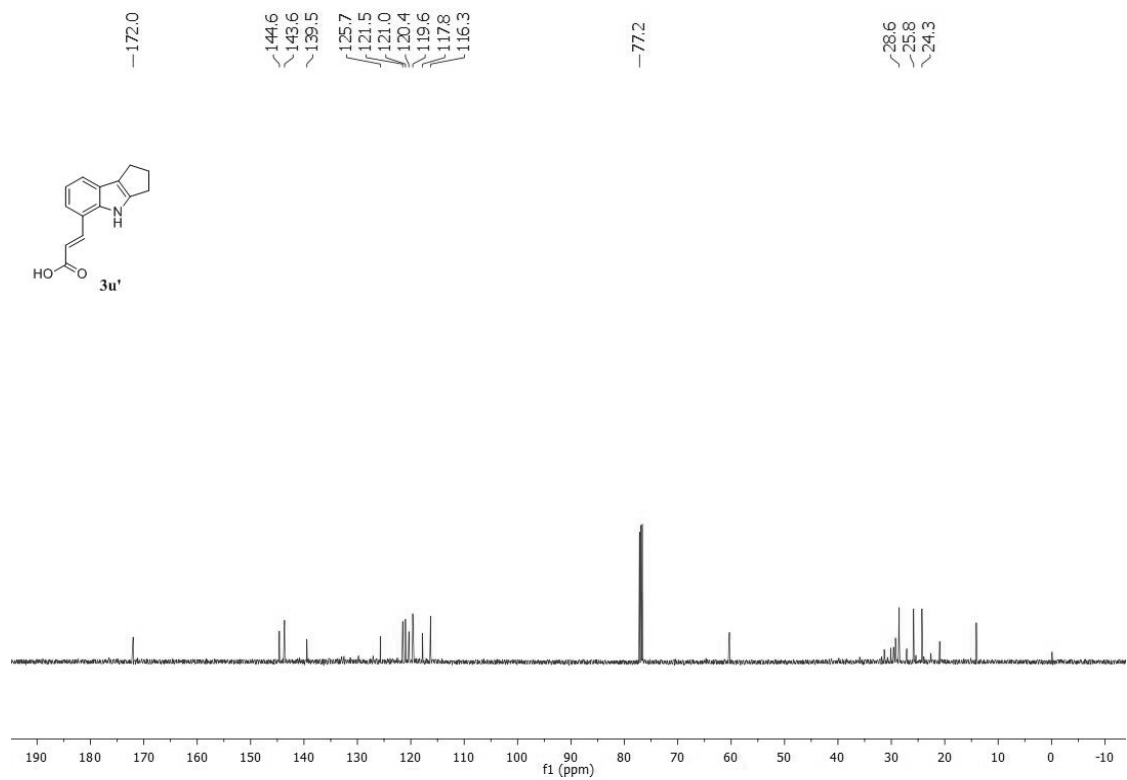

## HRMS spectrum of compound **3u**'

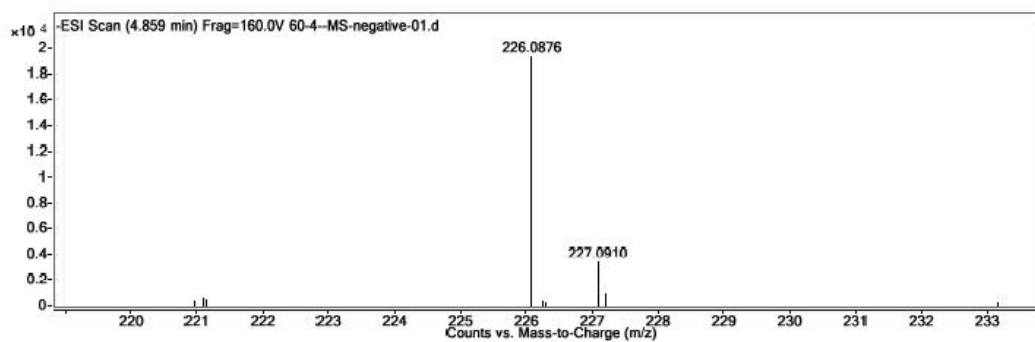

### Elemental Composition Calculator

|                                                 |                                       |                     |                  |                 |                    |
|-------------------------------------------------|---------------------------------------|---------------------|------------------|-----------------|--------------------|
| <b>Target m/z:</b>                              | 226.0876                              | <b>Result type:</b> | Negative ions    | <b>Species:</b> | [M-H] <sup>-</sup> |
| <b>Elements:</b>                                | C (0-80); H (0-120); O (0-30); N(0-5) |                     |                  |                 |                    |
| <b>Ion Formula</b>                              | <b>Calculated m/z</b>                 |                     | <b>PPM Error</b> |                 |                    |
| C <sub>14</sub> H <sub>12</sub> NO <sub>2</sub> | 226.0874                              |                     | -1.0             |                 |                    |

### $^1\text{H}$ NMR spectra of compound **5y'**

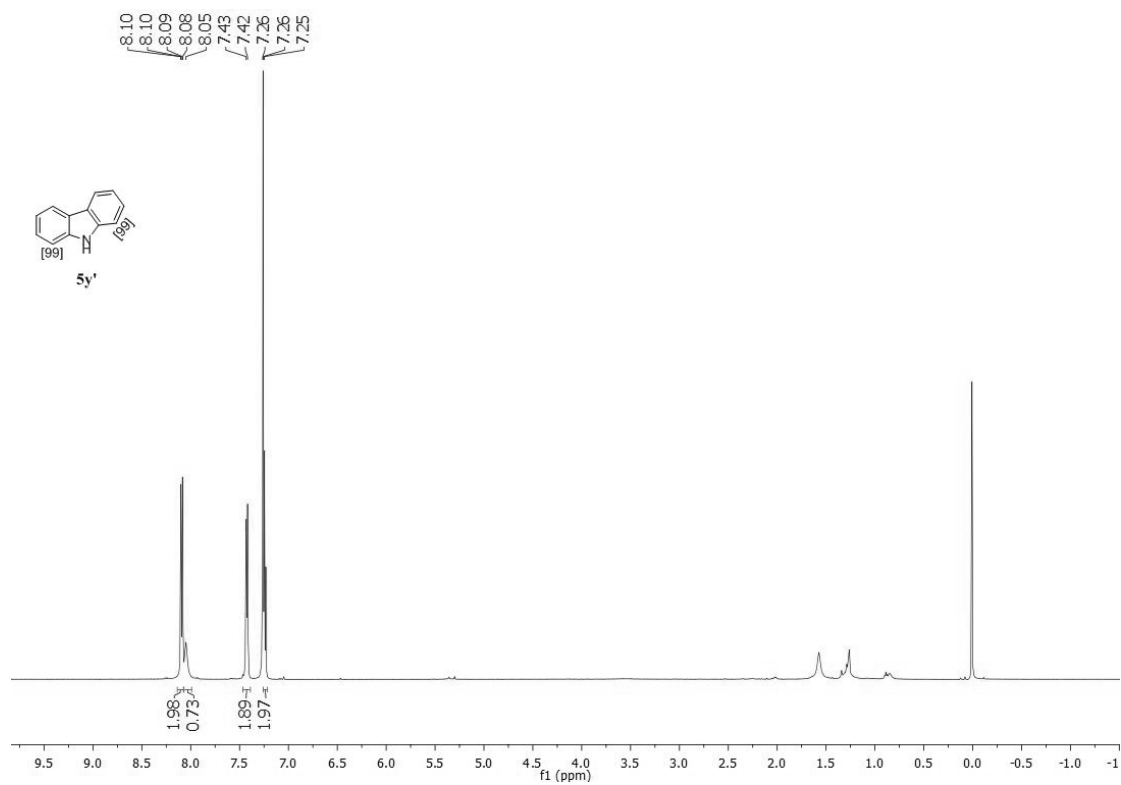

### $^{13}\text{C}$ NMR spectra of compound **5y'**

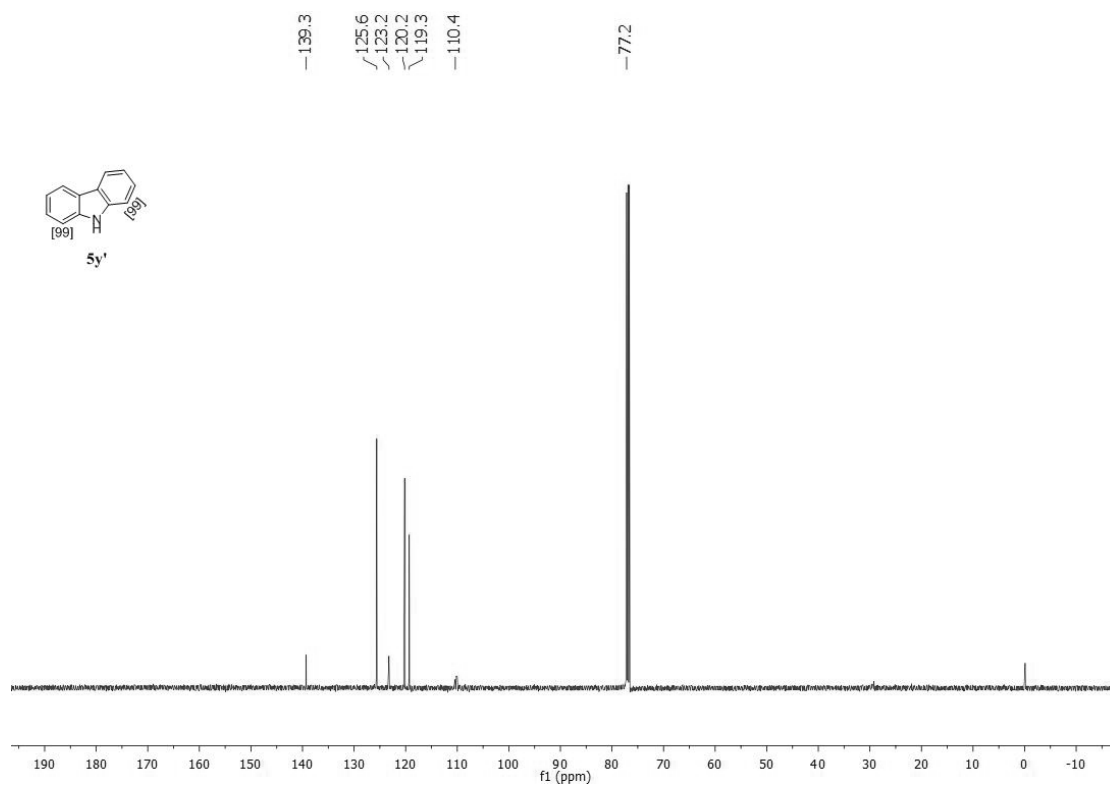

## HRMS spectrum of compound **5y**'

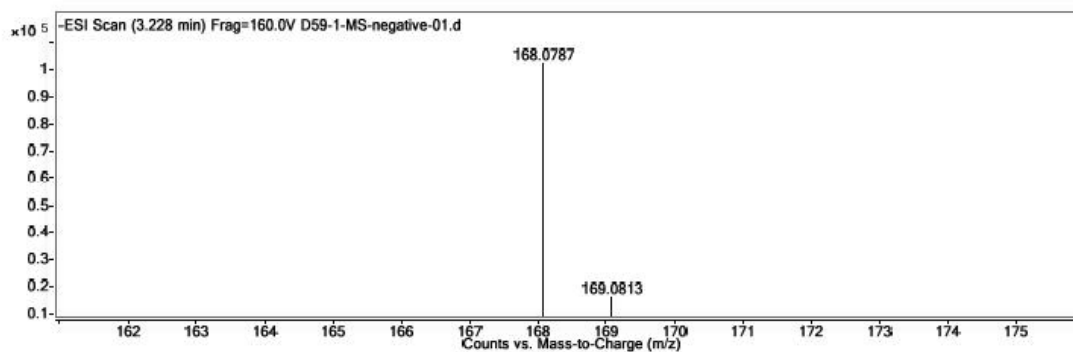

### Elemental Composition Calculator

|                                                 |                                               |                     |                  |                 |                    |
|-------------------------------------------------|-----------------------------------------------|---------------------|------------------|-----------------|--------------------|
| <b>Target m/z:</b>                              | 168.0787                                      | <b>Result type:</b> | Negative ions    | <b>Species:</b> | [M-H] <sup>-</sup> |
| <b>Elements:</b>                                | C (0-80); H (0-120); O (0-30); N(0-5); D(0-5) |                     |                  |                 |                    |
| <b>Ion Formula</b>                              | <b>Calculated m/z</b>                         |                     | <b>PPM Error</b> |                 |                    |
| C <sub>12</sub> H <sub>6</sub> D <sub>2</sub> N | 168.0788                                      |                     | 0.32             |                 |                    |

#### 4. X-ray Crystallographic Analysis of 3p

Crystallographic data have been deposited with the Cambridge Crystallographic Data Centre as supplementary publication no. CCDC Number: 2025858.

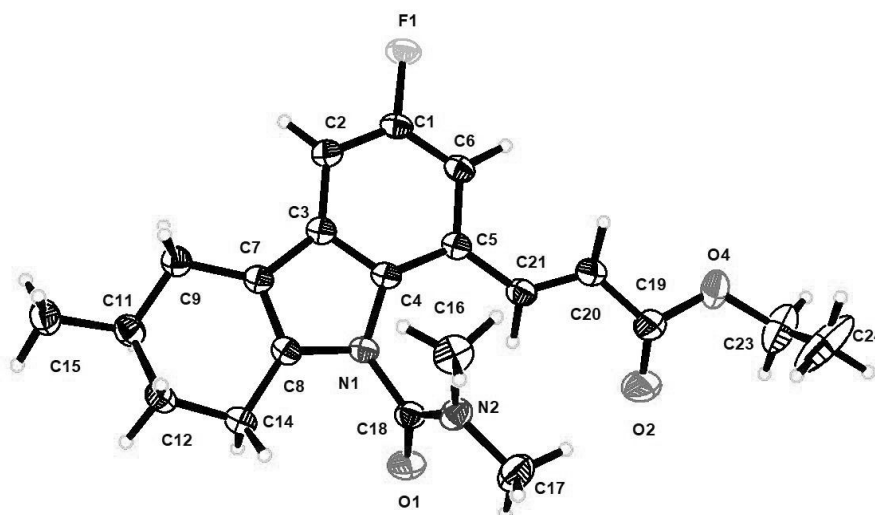

Table S6 Crystal data and structure refinement for **3p**.

|                                                                                       |                                                                |                                                                |                    |
|---------------------------------------------------------------------------------------|----------------------------------------------------------------|----------------------------------------------------------------|--------------------|
| Bond precision:                                                                       | C-C = 0.0027 Å                                                 |                                                                | Wavelength=1.54178 |
| Cell:                                                                                 | a = 10.4277 (3)                                                | b = 8.5846 (2)                                                 | c = 22.3869 (5)    |
|                                                                                       | alpha=90                                                       | beta=98.044 (1)                                                | gamma=90           |
| Temperature:                                                                          | 170 K                                                          |                                                                |                    |
|                                                                                       | Calculated                                                     | Reported                                                       |                    |
| Volume                                                                                | 1984.31 (9)                                                    | 1984.30 (9)                                                    |                    |
| Space group                                                                           | P 21/n                                                         | P 1 21/n 1                                                     |                    |
| Hall group                                                                            | -P 2yn                                                         | -P 2yn                                                         |                    |
| Moiety formula                                                                        | C <sub>21</sub> H <sub>25</sub> FN <sub>2</sub> O <sub>3</sub> | C <sub>21</sub> H <sub>25</sub> FN <sub>2</sub> O <sub>3</sub> |                    |
| Sum formula                                                                           | C <sub>21</sub> H <sub>25</sub> FN <sub>2</sub> O <sub>3</sub> | C <sub>21</sub> H <sub>25</sub> FN <sub>2</sub> O <sub>3</sub> |                    |
| Mr                                                                                    | 372.43                                                         | 372.43                                                         |                    |
| Dx, g cm <sup>-3</sup>                                                                | 1.247                                                          | 1.247                                                          |                    |
| Z                                                                                     | 4                                                              | 4                                                              |                    |
| Mu (mm <sup>-1</sup> )                                                                | 0.738                                                          | 0.738                                                          |                    |
| F000                                                                                  | 792.0                                                          | 792.0                                                          |                    |
| F000'                                                                                 | 794.53                                                         |                                                                |                    |
| h,k,lmax                                                                              | 12, 9, 26                                                      | 12, 9, 25                                                      |                    |
| Nref                                                                                  | 3257                                                           | 3203                                                           |                    |
| Tmin,Tmax                                                                             | 0.876, 0.915                                                   | 0.647, 0.754                                                   |                    |
| Tmin'                                                                                 | 0.869                                                          |                                                                |                    |
| Correction method= # Reported T Limits: Tmin=0.647 Tmax=0.754<br>AbsCorr = MULTI-SCAN |                                                                |                                                                |                    |
| Data completeness = 0.983                                                             |                                                                | Theta (max) = 63.675                                           |                    |
| R (reflections) = 0.0483 (2738)                                                       |                                                                | wR2 (reflections) = 0.1354 (3203)                              |                    |
| S = 1.040                                                                             |                                                                | Npar= 294                                                      |                    |
